# Supplementary material for: Enantioselective synthesis of tetrahydroisoquinolines via catalytic intramolecular asymmetric reductive amination
Source: Royal Society of Chemistry journal article supplement (doi:10.1039/d0qo01554g), 2021-01-01
Supplement: d0qo01554g1.pdf [file d0qo01554g1.pdf]

## Supporting Information

### **Enantioselective Synthesis of Tetrahydroisoquinolines via Catalytic Intramolecular Asymmetric Reductive Amination**

Ruixia Liu<sup>a,+</sup>, Jingkuo Han<sup>a,+</sup>, Bin Li<sup>b</sup>, Xian Liu<sup>c</sup>, Zhao Wei<sup>a</sup>, Jiaxin Wang<sup>a</sup>, Qiaofeng Wang<sup>a,d</sup>, Ru Jiang<sup>a,\*</sup>, Huifang Nie<sup>a,\*</sup>, and Shengyong Zhang<sup>a</sup>

<sup>a</sup>School of Pharmacy, Fourth Military Medical University, Xi'an, 710032, China

<sup>b</sup>Key Laboratory of Resource Biology and Biotechnology in Western China, Ministry of Education, The College of Life Sciences, Northwest University, Xi'an 710069, PR China

<sup>c</sup>Beijing Institute of Radiation Medicine, 27 Taiping road, Beijing, 100850, PR China

<sup>d</sup>Xi'an Peihua University, Xi'an, 710032, PR China

<sup>+</sup>These authors contributed equally.

<sup>\*</sup>Corresponding author.

*E-mail addresses:* [jiangru@fmmu.edu.cn](mailto:jiangru@fmmu.edu.cn); [niehuifang@fmmu.edu.cn](mailto:niehuifang@fmmu.edu.cn)

### Contents

|                                                                                                                |      |
|----------------------------------------------------------------------------------------------------------------|------|
| 1. General remarks                                                                                             | S2   |
| 2. General procedure for synthesis of substrates                                                               | S2   |
| 3. Procedure for one-pot <i>N</i> -Boc deprotection and intramolecular asymmetric reductive amination reaction | S18  |
| 4. NMR spectra and HRMS                                                                                        | S32  |
| 5. HPLC spectra                                                                                                | S101 |

## 1. General remarks

Unless otherwise specified, all experiments dealing with air- or moisture-sensitive compounds were performed using standard Schlenk techniques. All other commercial chemicals were purchased from J&K or Energy Chemical (Shanghai, China) in the highest purity and used without purification. THF, *t*-butyl methyl ether (TBME) and toluene were distilled from sodium benzophenone ketyl. CH<sub>2</sub>Cl<sub>2</sub>, CHCl<sub>3</sub> and ethyl acetate were distilled from CaH<sub>2</sub> under an atmosphere of argon. NMR spectra were recorded on a Bruker 400 MHz NMR spectrometer. Optical rotations were measured on a PERKIN ELMER polarimeter 343 instrument. HRMS were recorded on ZAB-MS spectrometer with ES ionization (ESI). Enantiomeric excesses were determined by Daicel chiral column on an Agilent 1260 Series HPLC instrument.

## 2. General procedure for synthesis of substrates

Substrates **2a-2f'** were prepared according to literature.<sup>1</sup>

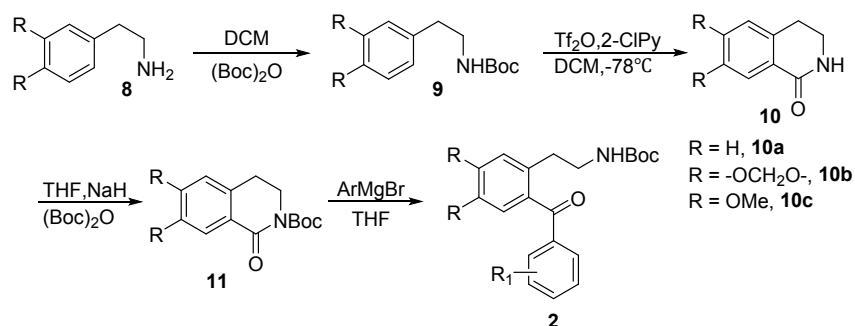

Phenyl ethyl amines **8** (50 mmol, 0.1 equiv) was resolved in DCM (200 mL), after cooling to 0 °C, NEt<sub>3</sub> (100 mmol, 2.0 equiv), DMAP (5 mmol, 0.1 equiv) and (Boc)<sub>2</sub>O (55 mmol, 1.1 equiv) were subsequently added, stirred at room temperature for 3 h. Then the reaction was quenched by the addition of a saturated NH<sub>4</sub>Cl solution at 0 °C. This solution was extracted with CH<sub>2</sub>Cl<sub>2</sub>. The organic phase washed with saturated NaCl, dried with anhydrous NaSO<sub>4</sub>, filtered, and concentrated in vacuo. The residue was purified by flash chromatography on silica gel (Petroleum ether/EtOAc = 5:1) to give the *N*-Boc-carbamate products **9a-c** as a white solid.

2-chloropyridine (75 mmol, 1.5 equiv) and triflic anhydride (52.5 mmol, 1.05 equiv) was added to a stirred solution of *N*-Boc-carbamate **9** (50 mmol, 1.0 equiv) in CH<sub>2</sub>Cl<sub>2</sub> (10 mL) at -78 °C. After 30 min, the reaction mixture was warmed to room temperature. Then the reaction was quenched by the addition of a saturated NaHCO<sub>3</sub> solution at 0 °C. This solution was diluted with CH<sub>2</sub>Cl<sub>2</sub>, washed with brine, dried with MgSO<sub>4</sub>, filtered, and concentrated in vacuo. The residue was purified by flash chromatography on silica gel (CH<sub>2</sub>Cl<sub>2</sub>/MeOH, 20:1) to give the cyclized products **10a-c** as a white solid.

NaH (60 mmol, 2.0 equiv) was slowly added to a solution of **10** (30 mmol, 1.0 equiv) in anhydrous THF (100 mL) at 0 °C. Then the reaction was stirred at this temperature for 1h. A solution of (Boc)<sub>2</sub>O (30 mmol, 1.0 equiv) in THF (20 mL) was slowly added to the above mixture. After stirring at room temperature for 12 h, the reaction was quenched with aq. NH<sub>4</sub>Cl solution and concentrated under vacuum. Then the reaction mixture was extracted with EtOAc (3 × 50 mL). The combined organic layers were washed with brine, dried over Na<sub>2</sub>SO<sub>4</sub>, and concentrated under vacuum. The crude product was purified by recrystallization (EtOAc/Petroleum ether) to provide product **11a-c**.

To a solution of the resulting **11** (6 mmol, 1.0 equiv) in THF (20 mL) was added Grignard reagent (9.0 mmol, 1.5 equiv) via syringe dropwise at 0 °C. The reaction was stirred at this temperature for 15 min and slowly warm to room temperature overnight. The reaction was quenched by water and extracted with EtOAc (3 × 50 mL). The combined organic layers were washed with brine, dried over Na<sub>2</sub>SO<sub>4</sub>, and concentrated under vacuum. The product **2a-c** was purified by column chromatography or recrystallization (Petroleum ether/EtOAc=5:1).<sup>2</sup>

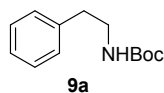

*tert*-butyl phenethylcarbamate<sup>1</sup> (**9a**): 10.84 g, 98% yield; colorless oil; <sup>1</sup>H NMR (400 MHz, CDCl<sub>3</sub>) δ 7.34 - 7.28 (m, 2H), 7.25 - 7.17 (m, 3H), 4.55 (s, 1H), 3.38 (q, *J* = 6.8 Hz, 2H), 2.80 (t, *J* = 7.1 Hz, 2H), 1.43 (s, 9H).

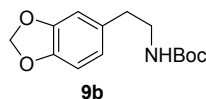

*tert*-butyl(2-(benzo[d][1,3]dioxol-5-yl)ethyl)carbamate<sup>1</sup> (**9b**): 13.0 g, 98% yield; white solid; <sup>1</sup>H NMR (400 MHz, CDCl<sub>3</sub>) δ 6.74 (d, *J* = 7.8 Hz, 1H), 6.68 (s, 1H), 6.63 (d, *J* = 7.7 Hz, 1H), 5.93 (s, 2H), 3.41 - 3.20 (m, 2H), 2.71 (t, *J* = 6.8 Hz, 2H), 1.44 (s, 9H).

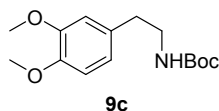

*tert*-butyl (3,4-dimethoxyphenethyl)carbamate<sup>1</sup> (**9c**): 13.8 g, 98 %yield; white solid; <sup>1</sup>H NMR (400 MHz, CDCl<sub>3</sub>) δ 6.81 (d, *J* = 8.0 Hz, 1H), 6.73 (d, *J* = 9.7 Hz, 2H), 4.57 (s,1H), 3.87 (d, *J* = 4.2 Hz, 6H), 3.36 (q, *J* = 6.3 Hz, 2H), 2.75 (t, *J* = 6.9 Hz, 2H), 1.44 (s, 9H).

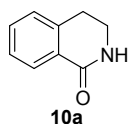

3,4-dihydroisoquinolin-1(2*H*)-one<sup>1</sup> (**10a**): 5.15 g, 70% yield; white solid; <sup>1</sup>H NMR (400 MHz, CDCl<sub>3</sub>) δ 8.07 (d, *J* = 7.6 Hz, 1H), 7.45 (t, *J* = 7.9 Hz, 1H), 7.36 (t, *J* = 7.4 Hz, 1H), 7.23 (d, *J* = 7.5 Hz, 1H), 6.68 (s, 1H), 3.58 (td, *J* = 6.6, 2.9 Hz, 2H), 3.01 (t, *J* = 6.6 Hz, 2H).

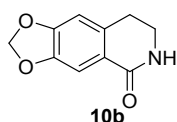

7,8-dihydro-[1,3]dioxolo[4,5-*g*]isoquinolin-5(6*H*)-one<sup>1</sup> (**10b**): 6.59g, 69%yield; white solid; <sup>1</sup>H NMR (400 MHz, CDCl<sub>3</sub>) δ 7.51 (s, 1H), 6.62 (d, *J* = 21.5 Hz, 2H), 6.00 (s, 2H), 3.52 (td, *J* = 6.7, 2.8 Hz, 2H), 2.89 (t, *J* = 6.6 Hz, 2H).

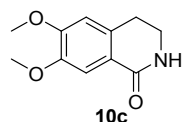

6,7-dimethoxy-3,4-dihydroisoquinolin-1(2*H*)-one<sup>1</sup> (**10c**): 7.77 g, 75% yield; white solid; <sup>1</sup>H NMR (400 MHz, CDCl<sub>3</sub>) δ 7.59 (s, 1H), 6.70 (s, 1H), 4.19 (t, *J* = 6.1

Hz, 2H), 3.97 (s, 3H), 3.92 (s, 3H), 3.12 (t,  $J = 6.1$  Hz, 2H).

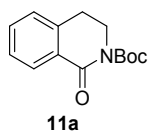

*tert*-butyl-1-oxo-3,4-dihydroisoquinoline-2(1*H*)-carboxylate<sup>1</sup> (**11a**): 7.05 g, 95% yield; white solid; <sup>1</sup>H NMR (400 MHz, CDCl<sub>3</sub>)  $\delta$  8.16 (m, 1H), 7.47 (m, 1H), 7.36 (m, 1H), 7.21 (d,  $J = 7.7$  Hz, 1H), 4.00 (m, 2H), 3.01 (t,  $J = 6.1$  Hz, 2H), 1.59 (s, 9H).

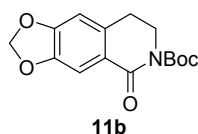

*tert*-butyl-5-oxo-7,8-dihydro-[1,3]dioxolo[4,5-*g*]isoquinoline-6(5*H*)-carboxylate (**11b**): 7.05 g, 95% yield; white solid; <sup>1</sup>H NMR (400 MHz, CDCl<sub>3</sub>)  $\delta$  7.58 (s, 1H), 6.62 (s, 1H), 6.01 (s, 2H), 4.05 - 3.83 (m, 2H), 2.95 - 2.86 (m, 2H), 1.58 (s, 9H). <sup>13</sup>C NMR (100 MHz, CDCl<sub>3</sub>)  $\delta$  163.34, 153.14, 151.53, 147.17, 135.83, 123.32, 108.90, 106.79, 101.73, 83.04, 44.51, 28.44, 28.11. HRMS (ESI)  $m/z$  Calculated for C<sub>15</sub>H<sub>17</sub>NO<sub>5</sub> [M+Na]<sup>+</sup>: 314.1004, Found: 314.1003.

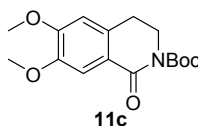

*tert*-butyl 6,7-dimethoxy-1-oxo-3,4-dihydroisoquinoline-2(1*H*)-carboxylate<sup>3</sup> (**10c**): 8.85 g, 96% yield; white solid; <sup>1</sup>H NMR (400 MHz, CDCl<sub>3</sub>)  $\delta$  7.65 (s, 1H), 6.64 (s, 1H), 3.98 (t,  $J = 6.2$  Hz, 2H), 3.93 (s, 3H), 3.91 (s, 3H), 2.94 (t,  $J = 6.2$  Hz, 2H), 1.59 (s, 9H).

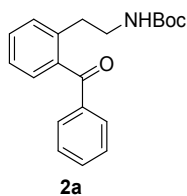

*tert*-butyl(2-benzoylphenethyl)carbamate<sup>2</sup> (**2a**): 1.66 g, 85% yield, colorless oil liquid; <sup>1</sup>H NMR (400 MHz, CDCl<sub>3</sub>)  $\delta$  7.80 (d,  $J = 7.6$  Hz, 2H), 7.60 (t,  $J = 7.4$  Hz, 1H), 7.47 (t,  $J = 7.7$  Hz, 2H), 7.39 (d,  $J = 7.7$  Hz, 1H), 7.35 - 7.26 (m, 2H), 5.02 (s, 1H), 3.39 (q,  $J = 6.6$  Hz, 2H), 2.86 (t,  $J = 6.9$  Hz, 2H), 1.40 (s, 9H).

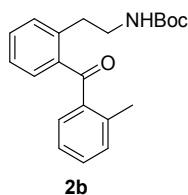

*tert*-butyl(2-(2-methylbenzoyl)phenethyl)carbamate<sup>2</sup> (**2b**): 1.77 g, 87% yield, colorless oil liquid; <sup>1</sup>H NMR (400 MHz, CDCl<sub>3</sub>) δ 7.50 - 7.34 (m, 3H), 7.34 - 7.23 (m, 3H), 7.21 (q, *J* = 8.1 Hz, 2H), 5.04 (s, 1H), 3.44 (q, *J* = 6.8 Hz, 2H), 3.00 (t, *J* = 7.2 Hz, 2H), 2.45 (s, 3H), 1.41 (s, 9H).

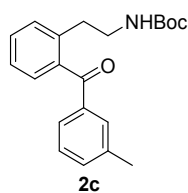

*tert*-butyl(2-(3-methylbenzoyl)phenethyl)carbamate<sup>2</sup> (**2c**): 1.77 g, 87% yield, colorless oil liquid; <sup>1</sup>H NMR (400 MHz, CDCl<sub>3</sub>) δ 7.64 (s, 1H), 7.56 (d, *J* = 7.8 Hz, 1H), 7.50 - 7.36 (m, 3H), 7.36 - 7.24 (m, 3H), 5.09 (s, 1H), 3.39 (m, 2H), 2.86 (m, 2H), 2.39 (s, 3H), 1.40 (s, 9H).

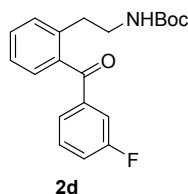

*tert*-butyl(2-(3-fluorobenzoyl)phenethyl)carbamate<sup>2</sup> (**2d**): 1.67 g, 81% yield, colorless oil liquid; <sup>1</sup>H NMR (400 MHz, CDCl<sub>3</sub>) δ 7.60 - 7.35 (m, 5H), 7.32-7.26 (m, 3H), 4.91 (s, 1H), 3.38 (q, *J* = 6.6 Hz, 2H), 2.86 (t, *J* = 7.0 Hz, 2H), 1.40 (s, 9H). <sup>19</sup>F NMR (376 MHz, Chloroform-*d*) δ -111.74.

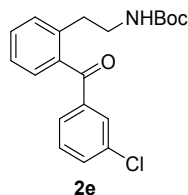

*tert*-butyl (2-(3-chlorobenzoyl)phenethyl)carbamate<sup>2</sup> (**2e**): 1.75 g, 81% yield, colorless oil liquid; <sup>1</sup>H NMR (400 MHz, CDCl<sub>3</sub>) δ 7.79 (s, 1H), 7.66 (d, *J* = 7.8 Hz, 1H), 7.57 (d, *J* = 8.1 Hz, 1H), 7.51 - 7.45 (m, 1H), 7.44 - 7.36 (m, 2H), 7.31-7.30 (m,

2H), 4.97 (d,  $J = 6.7$  Hz, 1H), 3.39 (q,  $J = 6.8$  Hz, 2H), 2.87 (t,  $J = 7.1$  Hz, 2H), 1.40 (s, 9H).

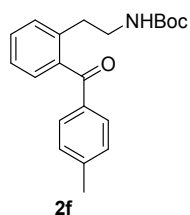

*tert*-butyl(2-(4-methylbenzoyl)phenethyl)carbamate<sup>2</sup> (**2f**): 1.77 g, 87% yield, colorless oil liquid; <sup>1</sup>H NMR (400 MHz, CDCl<sub>3</sub>)  $\delta$  7.83 - 7.60 (m, 2H), 7.52 - 7.41 (m, 1H), 7.37 (d,  $J = 7.9$  Hz, 1H), 7.33 - 7.14 (m, 4H), 4.98 (s, 1H), 3.37 (q,  $J = 7.2, 6.5$  Hz, 2H), 2.83 (t,  $J = 7.1$  Hz, 2H), 2.43 (s, 3H), 1.40 (s, 9H).

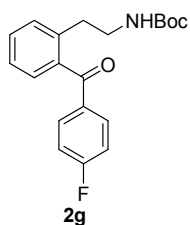

*tert*-butyl(2-(4-fluorobenzoyl)phenethyl)carbamate<sup>2</sup> (**2g**): 1.71 g, 83% yield, colorless oil liquid; <sup>1</sup>H NMR (400 MHz, CDCl<sub>3</sub>)  $\delta$  7.84 (dd,  $J = 8.4, 5.5$  Hz, 2H), 7.48-7.44 (m, 1H), 7.39 (d,  $J = 7.7$  Hz, 1H), 7.29 (d,  $J = 4.3$  Hz, 2H), 7.13 (t,  $J = 8.4$  Hz, 2H), 4.96 (s, 1H), 3.37 (q,  $J = 6.6$  Hz, 2H), 2.84 (t,  $J = 7.0$  Hz, 2H), 1.40 (s, 9H). <sup>19</sup>F NMR (376 MHz, Chloroform-*d*)  $\delta$  -104.50.

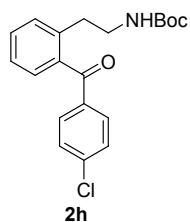

*tert*-butyl (2-(4-chlorobenzoyl)phenethyl) carbamate<sup>2</sup> (**2h**): 1.70 g, 79% yield, colorless oil liquid; <sup>1</sup>H NMR (400 MHz, CDCl<sub>3</sub>)  $\delta$  7.88 - 7.63 (m, 2H), 7.63 - 7.34 (m, 4H), 7.29 (d,  $J = 4.1$  Hz, 2H), 4.98 (s, 1H), 3.38 (q,  $J = 6.7$  Hz, 2H), 2.85 (t,  $J = 7.0$  Hz, 2H), 1.40 (s, 9H).

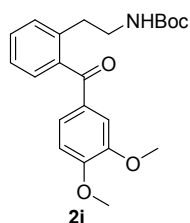

*tert*-butyl(2-(3,4-dimethoxybenzoyl)phenethyl)carbamate<sup>2</sup> (**2i**): 1.96 g, 85% yield, colorless oil liquid; <sup>1</sup>H NMR (400 MHz, CDCl<sub>3</sub>) δ 7.58 (s, 1H), 7.47-7.43 (m, 1H), 7.38 (d, *J* = 7.8 Hz, 1H), 7.29 (d, *J* = 8.1 Hz, 2H), 7.24 (d, *J* = 8.7 Hz, 1H), 6.84 (d, *J* = 8.4 Hz, 1H), 5.09 (s, 1H), 3.95 (s, 6H), 3.38 (q, *J* = 6.6 Hz, 2H), 2.83 (t, *J* = 7.1 Hz, 2H), 1.40 (s, 9H).

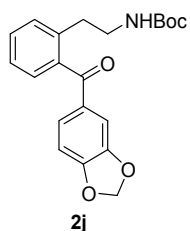

*tert*-butyl(2-(benzo[d][1,3]dioxole-5-carbonyl)phenethyl) carbamate (**2j**): 1.84 g, 83% yield, colorless oil liquid; <sup>1</sup>H NMR (400 MHz, CDCl<sub>3</sub>) δ 7.55 - 7.33 (m, 3H), 7.34 - 7.16 (m, 3H), 6.82 (d, *J* = 8.2 Hz, 1H), 6.07 (s, 2H), 5.04 (s, 1H), 3.36 (q, *J* = 6.6 Hz, 2H), 2.81 (t, *J* = 7.0 Hz, 2H), 1.40 (s, 9H). <sup>13</sup>C NMR (100 MHz, CDCl<sub>3</sub>) δ 196.67, 155.95, 152.21, 148.16, 138.93, 138.06, 132.26, 130.68, 130.25, 128.39, 127.70, 125.66, 109.41, 107.78, 101.99, 78.92, 42.06, 33.05, 28.38. HRMS (ESI) *m/z* Calculated for C<sub>21</sub>H<sub>23</sub>NNaO<sub>5</sub> [M+Na]<sup>+</sup>: 392.1474, Found: 392.1471.

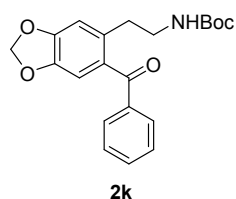

*tert*-butyl(2-(6-benzoylbenzo[d][1,3]dioxol-5-yl)ethyl) carbamate (**2k**): 1.96 g, 85% yield, white solid, *m.p.* 126.6-127.3 °C; <sup>1</sup>H NMR (400 MHz, CDCl<sub>3</sub>) δ 7.79-7.77 (m, 2H), 7.66 - 7.53 (m, 1H), 7.46 (t, *J* = 7.7 Hz, 2H), 6.85 (s, 1H), 6.79 (s, 1H), 6.01 (s, 2H), 5.10 (s, 1H), 3.36 (q, *J* = 6.5 Hz, 2H), 2.81 (t, *J* = 6.9 Hz, 2H), 1.41 (s, 9H). <sup>13</sup>C NMR (100 MHz, CDCl<sub>3</sub>) δ 196.64, 155.39, 149.02, 144.74, 137.42, 134.17,



132.43, 131.05, 129.66, 127.77, 110.25, 109.10, 101.00, 78.34, 41.76, 32.50, 27.78.

**HRMS (ESI)  $m/z$**  Calculated for  $C_{21}H_{23}NNaO_5$   $[M+Na]^+$ : 392.1468, Found: 392.1468.

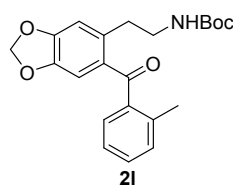

*tert*-butyl(2-(6-(2-methylbenzoyl)benzo[d][1,3]dioxol-5-yl) ethyl) carbamate (**2l**):

1.91 g, 83% yield, white solid, **m.p.** 102.5-104.3 °C;  **$^1H$  NMR** (400 MHz,  $CDCl_3$ )  $\delta$  7.38 (t,  $J = 7.3$  Hz, 1H), 7.29-7.26 (m, 2H), 7.21 (t,  $J = 7.4$  Hz, 1H), 6.84 (s, 1H), 6.73 (s, 1H), 5.99 (s, 2H), 5.11 (s, 1H), 3.41 (q,  $J = 6.6$  Hz, 2H), 2.99 (t,  $J = 7.1$  Hz, 2H), 2.39 (s, 3H), 1.42 (s, 9H).  **$^{13}C$  NMR** (100 MHz,  $CDCl_3$ )  $\delta$  199.18, 156.04, 150.22, 145.58, 139.31, 137.65, 136.46, 132.05, 131.26, 130.85, 129.75, 125.38, 111.34, 111.16, 101.72, 78.86, 42.32, 33.64, 28.40, 20.35. **HRMS (ESI)  $m/z$**  Calculated for  $C_{22}H_{25}NNaO_5$   $[M+Na]^+$ : 406.1630, Found: 406.1631.

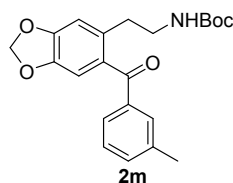

*tert*-butyl(2-(6-(3-methylbenzoyl)benzo[d][1,3]dioxol-5-yl) ethyl) carbamate

(**2m**): 1.91 g, 83% yield, white solid, **m.p.** 94.7-95.0 °C;  **$^1H$  NMR** (400 MHz,  $CDCl_3$ )  $\delta$  7.61 (s, 1H), 7.55 (d,  $J = 7.6$  Hz, 1H), 7.40 (d,  $J = 7.6$  Hz, 1H), 7.34 (d,  $J = 7.5$  Hz, 1H), 6.85 (s, 1H), 6.79 (s, 1H), 6.02 (s, 2H), 5.19 (s, 1H), 3.37 (q,  $J = 6.6$  Hz, 2H), 2.80 (t,  $J = 6.9$  Hz, 2H), 2.40 (s, 3H), 1.41 (s, 9H).  **$^{13}C$  NMR** (100 MHz,  $CDCl_3$ )  $\delta$  197.40, 156.01, 149.55, 145.29, 138.21, 138.00, 134.68, 133.86, 131.80, 130.59, 128.24, 127.65, 110.79, 109.62, 101.60, 78.80, 42.38, 33.05, 28.38, 21.28. **HRMS (ESI)  $m/z$**  Calculated for  $C_{22}H_{25}NNaO_5$   $[M+Na]^+$ : 406.1630, Found: 406.1628.

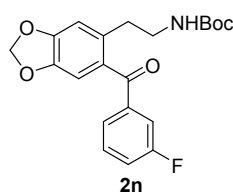

*tert*-butyl(2-(6-(3-fluorobenzoyl)benzo[d][1,3]dioxol-5-yl)ethyl) carbamate (**2n**): 1.93 g, 83% yield, white solid, **m.p.** 132.6-153.4 °C; **<sup>1</sup>H NMR** (400 MHz, CDCl<sub>3</sub>) δ 7.54 (d, *J* = 7.7 Hz, 1H), 7.50-7.47 (m, 1H), 7.46-7.41 (m, 1H), 7.30-7.28 (m, 1H), 6.85 (s, 1H), 6.78 (s, 1H), 6.03 (s, 2H), 5.02 (s, 1H), 3.36 (q, *J* = 6.6 Hz, 2H), 2.82 (t, *J* = 6.9 Hz, 2H), 1.41 (s, 9H). **<sup>13</sup>C NMR** (100 MHz, CDCl<sub>3</sub>) δ 195.69, 162.52 (d, *J* = 248.3 Hz), 155.97, 149.92, 145.42, 140.21 (d, *J* = 6.1 Hz), 135.21, 130.91, 130.05 (d, *J* = 7.6 Hz), 126.11 (d, *J* = 2.9 Hz), 120.00 (d, *J* = 21.4 Hz), 116.76 (d, *J* = 22.3 Hz), 111.03, 109.66, 101.74, 78.95, 42.34, 33.19, 28.36. **<sup>19</sup>F NMR** (376 MHz, CDCl<sub>3</sub>) δ -111.81. **HRMS (ESI)** *m/z* Calculated for C<sub>21</sub>H<sub>22</sub>FNNaO<sub>5</sub> [M+Na]<sup>+</sup>: 410.1380, Found: 410.1380.

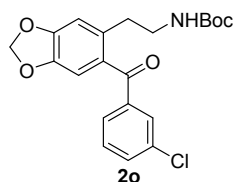

*tert*-butyl(2-(6-(4-chlorobenzoyl)benzo[d][1,3]dioxol-5-yl)ethyl) carbamate (**2o**): 2.06 g, 85% yield, white solid, **m.p.** 121.0-121.7 °C; **<sup>1</sup>H NMR** (400 MHz, CDCl<sub>3</sub>) δ 7.76 (s, 1H), 7.65 (d, *J* = 7.8 Hz, 1H), 7.56 (d, *J* = 7.6 Hz, 1H), 7.40 (t, *J* = 7.9 Hz, 1H), 6.86 (s, 1H), 6.77 (s, 1H), 6.04 (s, 2H), 5.07 (s, 1H), 3.37 (q, *J* = 6.6 Hz, 2H), 2.81 (d, *J* = 7.1 Hz, 2H), 1.41 (s, 9H). **<sup>13</sup>C NMR** (100 MHz, CDCl<sub>3</sub>) δ 195.68, 155.99, 150.00, 145.47, 139.78, 135.34, 134.69, 132.92, 130.80, 130.07, 129.73, 128.38, 111.09, 109.72, 101.76, 79.0, 42.37, 33.23, 28.39. **HRMS (ESI)** *m/z* Calculated for C<sub>21</sub>H<sub>22</sub>ClNNaO<sub>5</sub> [M+Na]<sup>+</sup>: 426.1084, Found: 426.1081.

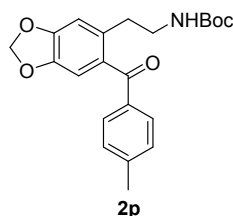

*tert*-butyl(2-(6-(4-methylbenzoyl)benzo[d][1,3]dioxol-5-yl)ethyl) carbamate (**2p**): 1.93 g, 84% yield, white solid, **m.p.** 102.2-103.7 °C; **<sup>1</sup>H NMR** (400 MHz, CDCl<sub>3</sub>) δ 7.76 - 7.59 (m, 2H), 7.25 (d, *J* = 8.2 Hz, 2H), 6.84 (s, 1H), 6.78 (s, 1H), 6.01 (s, 2H),

5.12 (s, 1H), 3.35 (q,  $J = 6.5$  Hz, 2H), 2.78 (t,  $J = 6.9$  Hz, 2H), 2.43 (s, 3H), 1.41 (s, 9H).  $^{13}\text{C}$  NMR (100 MHz,  $\text{CDCl}_3$ )  $\delta$  197.03, 156.03, 149.45, 145.35, 144.06, 135.37, 134.35, 132.05, 130.49, 129.13, 110.76, 109.49, 101.58, 78.94, 42.37, 33.02, 28.41, 21.70. HRMS (ESI)  $m/z$  Calculated for  $\text{C}_{22}\text{H}_{25}\text{NNaO}_5$   $[\text{M}+\text{Na}]^+$ : 406.1625, Found: 406.1621.

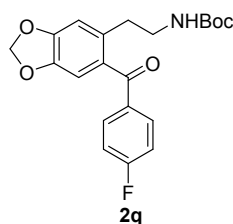

*tert*-butyl(2-(6-(4-fluorobenzoyl)benzo[d][1,3]dioxol-5-yl)ethyl) carbamate (**2q**): 2.0 g, 86% yield, white solid, **m.p.** 90.7-92.0 °C;  $^1\text{H}$  NMR (400 MHz,  $\text{CDCl}_3$ )  $\delta$  8.01 - 7.62 (m, 2H), 7.19 - 7.05 (m, 2H), 6.85 (s, 1H), 6.76 (s, 1H), 6.02 (s, 2H), 5.07 (s, 1H), 3.36 (q,  $J = 6.5$  Hz, 2H), 2.79 (t,  $J = 6.8$  Hz, 2H), 1.41 (s, 9H).  $^{13}\text{C}$  NMR (100 MHz,  $\text{CDCl}_3$ )  $\delta$  195.67, 165.74 (d,  $J = 255.4$  Hz), 155.99, 149.71, 145.45, 134.69, 134.33, 132.92 (d,  $J = 9.3$  Hz), 131.41, 115.58 (d,  $J = 21.9$  Hz), 110.94, 109.41, 101.69, 78.99, 42.36, 33.13, 28.40.  $^{19}\text{F}$  NMR (376 MHz,  $\text{CDCl}_3$ )  $\delta$  -104.90. HRMS (ESI)  $m/z$  Calculated for  $\text{C}_{21}\text{H}_{22}\text{FNNaO}_5$   $[\text{M}+\text{Na}]^+$ : 410.1380, Found: 410.1378.

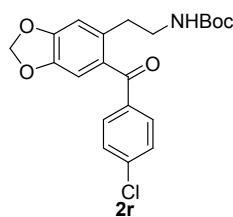

*tert*-butyl(2-(6-(4-chlorobenzoyl)benzo[d][1,3]dioxol-5-yl)ethyl) carbamate (**2r**): 2.04 g, 84% yield, white solid, **m.p.** 160.0-161.7 °C;  $^1\text{H}$  NMR (400 MHz,  $\text{CDCl}_3$ )  $\delta$  7.73 (d,  $J = 8.2$  Hz, 2H), 7.44 (d,  $J = 8.2$  Hz, 2H), 6.85 (s, 1H), 6.76 (s, 1H), 6.03 (s, 2H), 5.08 (s, 1H), 3.36 (q,  $J = 6.7$  Hz, 2H), 2.80 (t,  $J = 6.8$  Hz, 2H), 1.41 (s, 9H).  $^{13}\text{C}$  NMR (100 MHz,  $\text{CDCl}_3$ )  $\delta$  195.92, 155.99, 149.85, 145.47, 139.58, 136.38, 134.99, 131.66, 131.13, 128.76, 111.02, 109.54, 101.73, 79.02, 42.37, 33.17, 28.40. HRMS (ESI)  $m/z$  Calculated for  $\text{C}_{21}\text{H}_{22}\text{ClNNaO}_5$   $[\text{M}+\text{Na}]^+$ : 426.1084, Found: 426.1085.

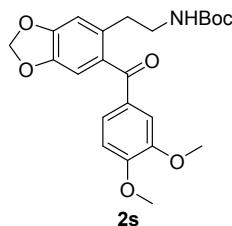

*tert*-butyl(2-(6-(3,4-dimethoxybenzoyl)benzo[d][1,3]dioxol-5-yl)ethyl)carbamate (**2s**): 2.24 g, 87% yield, colorless oil liquid; <sup>1</sup>H NMR (400 MHz, CDCl<sub>3</sub>) δ 7.53 (s, 1H), 7.32 - 7.24 (m, 1H), 6.85 (d, *J* = 7.9 Hz, 2H), 6.79 (s, 1H), 6.02 (s, 2H), 5.22 (s, 1H), 3.95 (s, 6H), 3.35 (q, *J* = 6.5 Hz, 2H), 2.76 (t, *J* = 6.9 Hz, 2H), 1.41 (s, 9H). <sup>13</sup>C NMR (100 MHz, CDCl<sub>3</sub>) δ 196.09, 156.00, 153.51, 149.13, 149.04, 145.27, 133.84, 132.11, 130.67, 126.14, 111.51, 110.62, 109.74, 109.10, 101.53, 78.86, 56.09, 55.99, 42.31, 32.91, 28.38. **HRMS (ESI)** *m/z* Calculated for C<sub>23</sub>H<sub>27</sub>NNaO<sub>7</sub> [M+Na]<sup>+</sup>: 452.1685, Found: 452.1686.

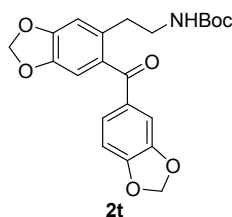

*tert*-butyl(2-(6-(benzo[d][1,3]dioxole-5-carbonyl)benzo[d][1,3]dioxol-5-yl)ethyl)carbamate (**2t**): 1.88 g, 76% yield, colorless oil liquid; <sup>1</sup>H NMR (400 MHz, CDCl<sub>3</sub>) δ 7.39 - 7.24 (m, 2H), 6.98 - 6.79 (m, 2H), 6.77 (s, 1H), 6.07 (s, 2H), 6.02 (s, 2H), 5.17 (s, 1H), 3.34 (q, *J* = 6.7 Hz, 2H), 2.92 - 2.62 (t, *J* = 6.9 Hz, 2H), 1.42 (s, 9H). <sup>13</sup>C NMR (100 MHz, CDCl<sub>3</sub>) δ 195.59, 156.01, 152.03, 149.31, 148.07, 145.33, 133.89, 132.45, 132.05, 127.42, 110.64, 109.56, 109.06, 107.75, 101.97, 101.57, 78.91, 42.30, 32.93, 28.39. **HRMS (ESI)** *m/z* Calculated for C<sub>22</sub>H<sub>23</sub>NNaO<sub>7</sub> [M+Na]<sup>+</sup>: 436.1372, Found: 436.1374.

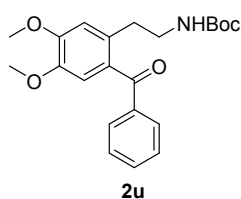

*tert*-butyl(2-benzoyl-4,5-dimethoxyphenethyl)carbamate (**2u**): 1.83 g, 79% yield,

white solid, **m.p.** 113.3-114.9 °C;  $^1\text{H NMR}$  (400 MHz,  $\text{CDCl}_3$ )  $\delta$  7.91-7.70 (m, 2H), 7.64-7.55 (m, 1H), 7.54-7.34 (m, 2H), 6.85 (t,  $J = 2.9$  Hz, 2H), 5.11 (s, 1H), 3.96 (s, 3H), 3.78 (s, 3H), 3.42 - 3.38 (m, 2H), 3.07 - 2.62 (t,  $J = 6.6$  Hz, 2H), 1.42 (s, 9H).  $^{13}\text{C NMR}$  (100 MHz,  $\text{CDCl}_3$ )  $\delta$  197.58, 156.08, 151.01, 146.39, 138.32, 133.14, 133.01, 130.34, 130.31, 128.41, 113.49, 113.09, 78.97, 56.12, 56.04, 42.36, 32.97, 28.43. **HRMS (ESI)**  $m/z$  Calculated for  $\text{C}_{22}\text{H}_{27}\text{NNaO}_5$   $[\text{M}+\text{Na}]^+$ : 408.1781, Found: 408.1781.

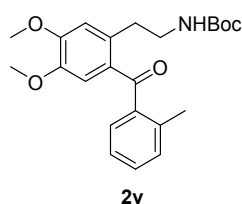

*tert*-butyl(4,5-dimethoxy-2-(2-methylbenzoyl)phenethyl) carbamate (**2v**): 1.87 g, 78% yield, white solid, **m.p.** 97.9 - 100.3 °C;  $^1\text{H NMR}$  (400 MHz,  $\text{CDCl}_3$ )  $\delta$  7.39 (t,  $J = 7.4$  Hz, 1H), 7.34 - 7.25 (m, 2H), 7.21 (t,  $J = 7.6$  Hz, 1H), 6.83 (s, 1H), 6.79 (s, 1H), 5.07 (s, 1H), 3.95 (s, 3H), 3.70 (s, 3H), 3.43 (q,  $J = 6.8$  Hz, 2H), 3.00 (t,  $J = 7.2$  Hz, 2H), 2.40 (s, 3H), 1.42 (s, 9H).  $^{13}\text{C NMR}$  (100 MHz,  $\text{CDCl}_3$ )  $\delta$  199.51, 156.08, 151.61, 146.50, 139.42, 137.75, 134.61, 131.30, 130.85, 130.61, 129.85, 125.34, 114.57, 113.89, 78.93, 56.03, 42.26, 33.46, 28.43, 20.42. **HRMS (ESI)**  $m/z$  Calculated for  $\text{C}_{23}\text{H}_{29}\text{NNaO}_5$   $[\text{M}+\text{Na}]^+$ : 422.1943, Found: 422.1938.

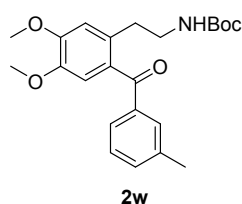

*tert*-butyl(4,5-dimethoxy-2-(3-methylbenzoyl)phenethyl) carbamate (**2w**): 1.94 g, 81% yield, white solid, **m.p.** 92.5-93.5 °C;  $^1\text{H NMR}$  (400 MHz,  $\text{CDCl}_3$ )  $\delta$  7.64 (s, 1H), 7.56 (d,  $J = 7.7$  Hz, 1H), 7.41 (d,  $J = 7.7$  Hz, 1H), 7.37-7.33 (m, 1H), 6.86-6.85 (m, 2H), 5.19 (s, 1H), 3.96 (s, 3H), 3.79 (s, 3H), 3.40-3.37 (m, 2H), 2.86-2.83 (m, 2H), 2.41 (s, 3H), 1.42 (s, 9H).  $^{13}\text{C NMR}$  (100 MHz,  $\text{CDCl}_3$ )  $\delta$  197.68, 156.02, 150.81, 146.22, 138.19, 133.74, 132.97, 130.57, 130.40, 128.16, 127.61, 113.32, 112.93, 78.77, 55.99, 55.90, 42.29, 32.81, 28.33, 21.23. **HRMS (ESI)**  $m/z$  Calculated for

$C_{23}H_{29}NNaO_5$   $[M+Na]^+$ : 422.1943, Found: 422.1937.

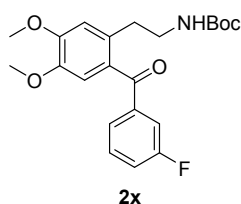

*tert*-butyl(2-(3-fluorobenzoyl)-4,5-dimethoxyphenethyl) carbamate (**2x**): 1.91 g, 79% yield, white solid, **m.p.** 107.3-107.7 °C;  $^1\text{H NMR}$  (400 MHz,  $\text{CDCl}_3$ )  $\delta$  7.57 - 7.47 (m, 2H), 7.47-7.41 (m, 1H), 7.33 - 7.25 (m, 1H), 6.86 (s, 1H), 6.83 (s, 1H), 5.03 (s, 1H), 3.96 (s, 3H), 3.79 (s, 3H), 3.39 (q,  $J = 6.6$  Hz, 2H), 2.85 (t,  $J = 7.0$  Hz, 2H), 1.41 (s, 9H).  $^{13}\text{C NMR}$  (100 MHz,  $\text{CDCl}_3$ )  $\delta$  196.04, 162.61 (d,  $J = 248.4$  Hz), 156.03, 151.29, 146.45, 140.54 (d,  $J = 6.1$  Hz), 133.49, 130.03 (d,  $J = 7.6$  Hz), 129.64, 126.11 (d,  $J = 2.7$  Hz), 119.96 (d,  $J = 21.4$  Hz), 116.79 (d,  $J = 22.3$  Hz), 113.62, 113.07, 79.04, 56.10 (d,  $J = 8.5$  Hz), 42.33, 33.07, 28.42.  $^{19}\text{F NMR}$  (376 MHz,  $\text{CDCl}_3$ )  $\delta$  -111.80. **HRMS (ESI)**  $m/z$  Calculated for  $C_{22}H_{26}FNNaO_5$   $[M+Na]^+$ : 426.1693, Found: 426.1690.

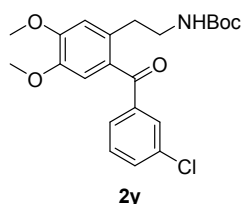

*tert*-butyl(2-(3-chlorobenzoyl)-4,5-dimethoxyphenethyl) carbamate (**2y**): 2.04 g, 81% yield, white solid, **m.p.** 102.9-103.9 °C;  $^1\text{H NMR}$  (400 MHz,  $\text{CDCl}_3$ )  $\delta$  7.79 (s, 1H), 7.65 (d,  $J = 7.8$  Hz, 1H), 7.60 - 7.48 (m, 1H), 7.41 (t,  $J = 7.9$  Hz, 1H), 6.86 (s, 1H), 6.82 (s, 1H), 5.09 (s, 1H), 3.97 (s, 3H), 3.79 (s, 3H), 3.40 (q,  $J = 6.7$  Hz, 2H), 2.85 (d,  $J = 7.2$  Hz, 2H), 1.41 (s, 9H).  $^{13}\text{C NMR}$  (100 MHz,  $\text{CDCl}_3$ )  $\delta$  195.90, 156.00, 151.28, 146.38, 140.02, 134.66, 133.60, 132.79, 130.04, 129.68, 129.42, 128.36, 113.61, 113.05, 78.92, 56.01, 42.30, 33.02, 28.38. **HRMS (ESI)**  $m/z$  Calculated for  $C_{22}H_{26}ClNNaO_5$   $[M+Na]^+$ : 442.1397, Found: 442.1398.

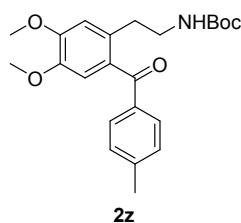

*tert*-butyl(4,5-dimethoxy-2-(4-methylbenzoyl)phenethyl) carbamate (**2z**): 1.99 g, 83% yield, white solid, **m.p.** 110.4-110.6 °C; <sup>1</sup>H NMR (400 MHz, CDCl<sub>3</sub>) δ 7.72-7.69 (m, 2H), 7.28-7.25 (m, 2H), 6.88 – 6.76 (m, 2H), 5.13 (s, 1H), 3.95 (s, 3H), 3.78 (s, 3H), 3.40-3.35 (m, 2H), 2.83 (t, *J* = 7.0 Hz, 2H), 2.43 (s, 3H), 1.41 (s, 9H). <sup>13</sup>C NMR (100 MHz, CDCl<sub>3</sub>) δ 197.34, 156.10, 150.79, 146.36, 143.97, 135.63, 132.75, 130.70, 130.51, 129.14, 113.37, 112.83, 78.93, 56.09, 56.02, 42.36, 32.86, 28.43, 21.70. **HRMS (ESI)** *m/z* Calculated for C<sub>23</sub>H<sub>29</sub>NNaO<sub>5</sub> [M+Na]<sup>+</sup>: 422.1938, Found: 422.1937.

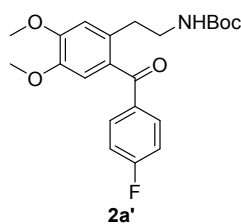

*tert*-butyl(2-(4-fluorobenzoyl)-4,5-dimethoxyphenethyl) carbamate (**2a'**): 1.86 g, 77% yield, white solid, **m.p.** 84.7 - 85.6 °C; <sup>1</sup>H NMR (400 MHz, CDCl<sub>3</sub>) δ 7.83 (m, 2H), 7.14 (t, *J* = 8.4 Hz, 2H), 6.85 (s, 1H), 6.81 (s, 1H), 5.07 (s, 1H), 3.96 (s, 3H), 3.79 (s, 3H), 3.38 (m, 2H), 2.83 (t, *J* = 7.0 Hz, 2H), 1.41 (s, 9H). <sup>13</sup>C NMR (100 MHz, CDCl<sub>3</sub>) δ 196.02, 165.72 (d, *J* = 255.1 Hz), 156.05, 151.08, 146.49, 134.64 (d, *J* = 2.8 Hz), 133.05, 132.91 (d, *J* = 9.3 Hz), 130.12, 115.59 (d, *J* = 21.8 Hz), 113.55, 112.81, 79.00, 56.09 (d, *J* = 8.3 Hz), 42.34, 32.98, 28.43. <sup>19</sup>F NMR (376 MHz, CDCl<sub>3</sub>) δ -105.09. **HRMS (ESI)** *m/z* Calculated for C<sub>22</sub>H<sub>26</sub>FNO<sub>5</sub> [M+Na]<sup>+</sup>: 426.1693, Found: 426.1689.

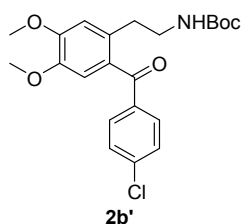

*tert*-butyl(2-(4-chlorobenzoyl)-4,5-dimethoxyphenethyl) carbamate (**2b'**): 2.02 g, 80% yield, white solid, **m.p.** 111.5-111.7 °C; **<sup>1</sup>H NMR** (400 MHz, CDCl<sub>3</sub>) δ 7.79 - 7.70 (m, 2H), 7.49 - 7.39 (m, 2H), 6.85 (s, 1H), 6.80 (s, 1H), 5.10 (s, 1H), 3.96 (s, 3H), 3.79 (s, 3H), 3.39 (m, 2H), 2.84 (t, *J* = 6.9 Hz, 2H), 1.41 (s, 9H). **<sup>13</sup>C NMR** (100 MHz, CDCl<sub>3</sub>) δ 196.19, 156.01, 151.15, 146.41, 139.43, 136.65, 133.30, 131.64, 129.76, 128.72, 113.54, 112.84, 78.96, 56.03, 42.33, 32.98, 28.41. **HRMS (ESI) *m/z*** Calculated for C<sub>22</sub>H<sub>26</sub>ClNO<sub>5</sub> [M+Na]<sup>+</sup>: 442.1397, Found: 442.1398.

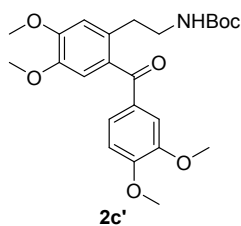

*tert*-butyl(2-(3,4-dimethoxybenzoyl)-4,5-dimethoxyphenethyl) carbamate (**2c'**): 2.22 g, 83% yield, light yellow solid, **m.p.** 164.7-165.9 °C; **<sup>1</sup>H NMR** (400 MHz, CDCl<sub>3</sub>) δ 7.54 (s, 1H), 7.34 - 7.25 (m, 1H), 6.86 (d, *J* = 9.0 Hz, 3H), 5.22 (s, 1H), 4.03 - 3.91 (m, 9H), 3.81 (s, 3H), 3.38 (q, *J* = 6.7 Hz, 2H), 2.81 (t, *J* = 7.0 Hz, 2H), 1.42 (s, 9H). **<sup>13</sup>C NMR** (100 MHz, CDCl<sub>3</sub>) δ 196.43, 156.09, 153.44, 150.56, 149.05, 146.29, 132.32, 130.95, 130.80, 126.03, 113.23, 112.42, 111.65, 109.77, 78.95, 56.12, 56.10, 56.03, 56.01, 42.34, 32.79, 28.43. **HRMS (ESI) *m/z*** Calculated for C<sub>24</sub>H<sub>31</sub>NO<sub>7</sub> [M+Na]<sup>+</sup>: 468.1998, Found: 468.1996.

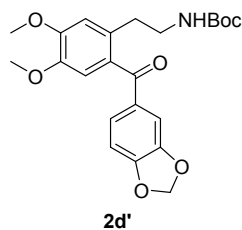

*tert*-butyl(2-(benzo[d][1,3]dioxole-5-carbonyl)-4,5-dimethoxyphenethyl) carbamate (**2d'**): 2.04 g, 79% yield, white solid, **m.p.** 126.5-127.3 °C; **<sup>1</sup>H NMR** (400 MHz, CDCl<sub>3</sub>) δ 7.37 (s, 1H), 7.32 (d, *J* = 8.3 Hz, 1H), 6.84-6.82 (m, 3H), 6.08 (s, 2H), 5.16 (s, 1H), 3.95 (s, 3H), 3.81 (s, 3H), 3.39-3.34 (m, 2H), 2.79 (t, *J* = 7.0 Hz, 2H), 1.41 (s, 9H). **<sup>13</sup>C NMR** (100 MHz, CDCl<sub>3</sub>) δ 195.96, 156.06, 151.98, 150.61, 148.12, 146.36, 132.73, 132.25, 130.78, 127.36, 113.21, 112.30, 109.57, 107.74, 101.97,



78.92, 56.09, 55.99, 42.28, 32.78, 28.42. **HRMS (ESI)  $m/z$**  Calculated for  $C_{23}H_{27}NO_7$   $[M+Na]^+$ : 452.1685, Found: 452.1677.

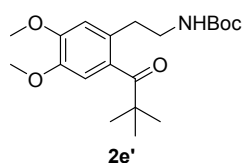

*tert*-butyl(4,5-dimethoxy-2-pivaloylphenethyl)carbamate (**2e'**): 1.52g, 83% yield, colorless oil;  $^1H$  NMR (400 MHz,  $CDCl_3$ )  $\delta$  6.77 (s, 1H), 6.75 (s, 1H), 5.10 (s, 1H), 3.90 (s, 3H), 3.86 (s, 3H), 3.34 (q,  $J = 6.6$  Hz, 2H), 2.58 (t,  $J = 6.9$  Hz, 2H), 1.43 (s, 9H), 1.26 (s, 9H).  $^{13}C$  NMR (100 MHz,  $CDCl_3$ )  $\delta$  213.74, 156.09, 149.52, 146.34, 132.69, 129.22, 112.88, 108.70, 79.00, 77.27, 56.09, 55.88, 45.02, 42.19, 33.12, 28.45, 27.70. **HRMS (ESI)  $m/z$**  Calculated for  $C_{20}H_{31}NO_5$   $[M+Na]^+$ : 388.2100, Found: 388.2095.

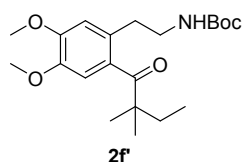

*tert*-butyl(2-(2,2-dimethylbutanoyl)-4,5-dimethoxyphenethyl)carbamate (**2f'**): 1.48g, 78% yield, colorless oil;  $^1H$  NMR (400 MHz,  $CDCl_3$ )  $\delta$  6.77 (s, 2H), 5.15 (s, 1H), 3.90 (s, 3H), 3.86 (s, 3H), 3.36 (q,  $J = 6.6$  Hz, 2H), 2.60 (t,  $J = 6.9$  Hz, 2H), 1.72 (q,  $J = 7.5$  Hz, 2H), 1.43 (s, 9H), 1.20 (s, 6H), 0.92 (t,  $J = 7.5$  Hz, 3H).  $^{13}C$  NMR (101 MHz,  $CDCl_3$ )  $\delta$  213.24, 156.11, 149.55, 146.32, 132.86, 129.66, 113.03, 108.63, 78.95, 77.30, 56.07, 55.86, 48.59, 42.27, 33.00, 28.45, 25.17, 9.15. **HRMS (ESI)  $m/z$**  Calculated for  $C_{21}H_{33}NO_5$   $[M+Na]^+$ : 402.2256, Found: 402.2255.

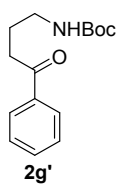

Substrates **2g'** was prepared according to ref 4.

*tert*-butyl (4-oxo-4-phenylbutyl)carbamate (**2g'**):<sup>4</sup> 3.21g, 61% yield, white solid;

$^1\text{H NMR}$  (400 MHz,  $\text{CDCl}_3$ )  $\delta$  7.96 (d,  $J = 7.3$  Hz, 2H), 7.63 - 7.52 (m, 1H), 7.50 - 7.42 (m, 2H), 3.23 (q,  $J = 6.6$  Hz, 2H), 3.03 (t,  $J = 7.1$  Hz, 2H), 1.97 - 1.92 (m, 2H), 1.42 (s, 9H).

### 3. Procedure for one-pot *N*-Boc deprotection and intramolecular asymmetric reductive amination reaction

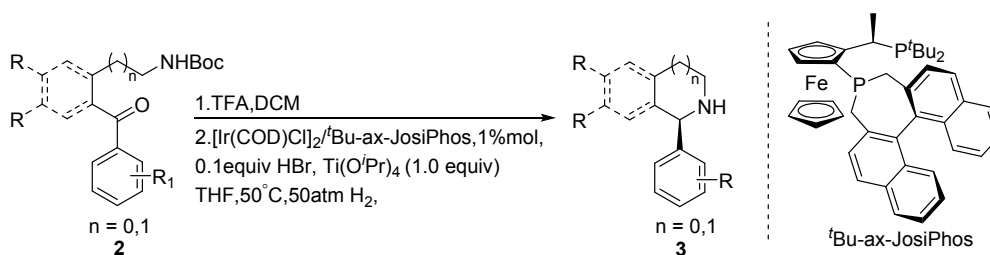

Substrate **2** (0.5 mmol) and TFA (3 mmol) were stirred in  $\text{CH}_2\text{Cl}_2$  under argon for 3 h, and then all volatiles were removed. In a glass tube equipped with a stir bar, the catalyst (1 mol %) was prepared *in situ* from  $[\text{Ir}(\text{COD})\text{Cl}]_2$  (0.0025 mmol, 1.6 mg) and (*R*)-*t*-Bu-ax-Josiphos (0.0055 mmol, 3.4 mg) in anhydrous THF (1 mL) over 30 min. The obtained *N*-Boc deprotected substance was dissolved in THF (1 mL) and then transferred to the above catalyst solution followed by the addition of HBr (0.1 equiv, 40% aq) and  $\text{Ti}(\text{O}^i\text{Pr})_4$  (1.0 equiv). The glass tube was then placed into an autoclave, followed by replacing air with  $\text{H}_2$  three times. The autoclave was charged with hydrogen to 50 atm, and then the reaction mixture was stirred at 50 °C for 24 h. The resulted solution was neutralized with aqueous sodium bicarbonate solution. The organic phase was concentrated and passed through a short column of silica gel to remove the metal complex to give the chiral tetrahydroisoquinoline product, which was then converted to the corresponding trifluoroacetamide and analyzed by chiral HPLC to determine the enantiomeric excess.

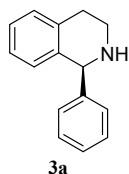

(*S*)-1-phenyl-1,2,3,4-tetrahydroisoquinoline<sup>2</sup> (**3a**): 103.60 mg, 94% yield, 95% *ee*,

white solid, **m.p.** 95.9-96.9 °C; **<sup>1</sup>H NMR** (400 MHz, CDCl<sub>3</sub>) δ 7.30 (m, 5H), 7.14 (d, *J* = 4.4 Hz, 2H), 7.04 (m, 1H), 6.75 (d, *J* = 7.8 Hz, 1H), 5.11 (s, 1H), 3.28 (m, 1H), 3.17 - 2.97 (m, 2H), 2.92 - 2.75 (m, 1H), 1.98(s, 1H). Enantiomeric excess was determined by chiral HPLC on a Chiralpak AS-H column, Hex/IPA = 95:5, 1 mL/min, 220 nm, *t<sub>R</sub>* = 5.75 min (minor), *t<sub>S</sub>* = 10.05 min (major).

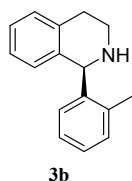

(*S*)-1-(2-methylphenyl)-1,2,3,4-tetrahydroisoquinoline<sup>2</sup> (**3b**): 102.73 mg, 81% yield, 87% *ee*, light yellow oil; **<sup>1</sup>H NMR** (400 MHz, CDCl<sub>3</sub>) δ 7.23 - 7.08 (m, 5H), 7.04 (m, 2H), 6.69 (d, *J* = 7.7 Hz, 1H), 5.34 (s, 1H), 3.42 - 3.23 (m, 1H), 3.21 - 2.93 (m, 2H), 2.90 - 2.77 (m, 1H), 2.41 (s, 3H), 1.73(s, 1H). Enantiomeric excess was determined by chiral HPLC on a Chiralpak AS-H+AD-H column, Hex/IPA = 95:5, 1 mL/min, 220 nm, *t<sub>R</sub>* = 9.89 min (minor), *t<sub>S</sub>* = 10.49 min (major).

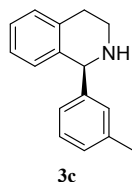

(*S*)-1-(3-methylphenyl)-1,2,3,4-tetrahydroisoquinoline<sup>2</sup> (**3c**): 110.54 mg, 91% yield, 90% *ee*, white solid, **m.p.** 85.1 - 87.2 °C; **<sup>1</sup>H NMR** (400 MHz, CDCl<sub>3</sub>) δ 7.21 (t, *J* = 7.9 Hz, 1H), 7.14 (m, 2H), 7.09 (d, *J* = 6.6 Hz, 2H), 7.07 - 6.95 (m, 2H), 6.76 (d, *J* = 7.7 Hz, 1H), 5.06 (s, 1H), 3.36 - 3.21 (m, 1H), 3.15 - 2.95 (m, 2H), 2.88 - 2.73 (m, 1H), 2.32 (s, 3H), 1.92(s, 1H). Enantiomeric excess was determined by chiral HPLC on a Chiralpak AS-H column, Hex/IPA = 95:5, 1 mL/min, 220 nm, *t<sub>R</sub>* = 4.68 min (minor), *t<sub>S</sub>* = 8.26 min (major).

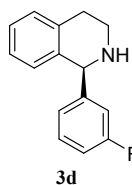

(*S*)-1-(3-fluorophenyl)-1,2,3,4-tetrahydroisoquinoline<sup>2</sup> (**3d**): 111.37 mg, 94% yield, 94% *ee*, white solid, **m.p.** 78.3 - 88.2 °C; <sup>1</sup>H NMR (400 MHz, CDCl<sub>3</sub>) δ 7.28 (m, 1H), 7.15 (m, 2H), 7.06 (m, 2H), 7.01 - 6.86 (m, 2H), 6.75 (d, *J* = 7.7 Hz, 1H), 5.10 (s, 1H), 3.31 - 3.19 (m, 1H), 3.14 - 2.96 (m, 2H), 2.83 (m, 1H), 1.90(s, 1H). <sup>19</sup>F NMR (376 MHz, CDCl<sub>3</sub>) δ -113.14. Enantiomeric excess was determined by chiral HPLC on a Chiralpak AS-H column, Hex/IPA = 95:5, 1 mL/min, 220 nm, *t<sub>R</sub>* = 5.55 min (minor), *t<sub>S</sub>* = 9.41 min (major).

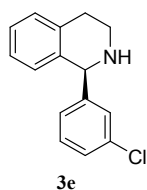

(*S*)-1-(3-chlorophenyl)-1,2,3,4-tetrahydroisoquinoline<sup>2</sup> (**3e**): 118.21 mg, 92% yield, 91% *ee*, white solid, **m.p.** 88.9 - 90.2 °C; <sup>1</sup>H NMR (400 MHz, CDCl<sub>3</sub>) δ 7.31 - 7.21 (m, 3H), 7.16 (m, 3H), 7.06 (dq, *J* = 8.4, 4.3 Hz, 1H), 6.74 (d, *J* = 7.7 Hz, 1H), 5.08 (s, 1H), 3.29 - 3.19 (m, 1H), 3.13 - 2.99 (m, 2H), 2.88 - 2.76 (m, 1H), 1.89(s, 1H). Enantiomeric excess was determined by chiral HPLC on a Chiralpak AS-H column, Hex/IPA = 95:5, 1 mL/min, 220 nm, *t<sub>R</sub>* = 5.42 min (minor), *t<sub>S</sub>* = 9.80 min (major).

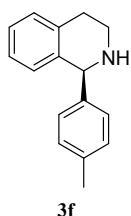

(*S*)-1-(4-methylphenyl)-1,2,3,4-tetrahydroisoquinoline<sup>2</sup> (**3f**): 109.43 mg, 95% yield, 79% *ee*, white solid, **m.p.** 81.9-83.9 °C; <sup>1</sup>H NMR (400 MHz, CDCl<sub>3</sub>) δ 7.26 (s, 2H), 7.14 (s, 6H), 7.03 (m, 1H), 6.76 (d, *J* = 7.8 Hz, 1H), 5.07 (s, 1H), 3.28 (m, 1H), 3.17 - 2.93 (m, 2H), 2.83 (m, 1H), 2.34 (s, 3H), 1.73(s, 1H). Enantiomeric excess was determined by chiral HPLC on a Chiralpak AS-H column, Hex/IPA = 95:5, 1 mL/min, 220 nm, *t<sub>R</sub>* = 5.76 min (minor), *t<sub>S</sub>* = 8.74 min (major).

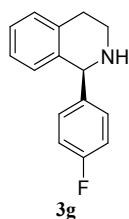

(*S*)-1-(4-fluorophenyl)-1,2,3,4-tetrahydroisoquinoline<sup>2</sup> (**3g**): 112.50 mg, 96% yield, 95% *ee*, white solid, **m.p.** 83.5 - 85.5 °C; <sup>1</sup>H NMR (400 MHz, CDCl<sub>3</sub>) δ 7.24 (dd, *J* = 8.2, 5.3 Hz, 2H), 7.15 (d, *J* = 4.2 Hz, 2H), 7.09 - 6.91 (m, 3H), 6.72 (d, *J* = 7.8 Hz, 1H), 5.09 (s, 1H), 3.30 - 3.20 (m, 1H), 3.15 - 2.98 (m, 2H), 2.90 - 2.73 (m, 1H), 1.93(s, 1H). <sup>19</sup>F NMR (376 MHz, CDCl<sub>3</sub>) δ -115.30. Enantiomeric excess was determined by chiral HPLC on a Chiralpak AS-H column, Hex/IPA = 95:5, 1 mL/min, 220 nm, *t<sub>R</sub>* = 5.52 min (minor), *t<sub>S</sub>* = 9.52 min (major).

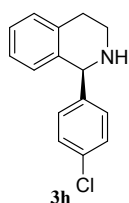

(*S*)-1-(4-chlorophenyl)-1,2,3,4-tetrahydroisoquinoline<sup>2</sup> (**3h**): 120.65 mg, 95% yield, 89% *ee*, white solid, **m.p.** 104.6 - 106.0 °C; <sup>1</sup>H NMR (400 MHz, CDCl<sub>3</sub>) δ 7.29 (d, *J* = 8.4 Hz, 2H), 7.21 (d, *J* = 8.2 Hz, 2H), 7.15 (d, *J* = 3.2 Hz, 2H), 7.04 (dt, *J* = 8.5, 4.3 Hz, 1H), 6.71 (d, *J* = 7.7 Hz, 1H), 5.08 (s, 1H), 3.30 - 3.20 (m, 1H), 3.15 - 2.98 (m, 2H), 2.89 - 2.75 (m, 1H), 1.84(s, 1H). Enantiomeric excess was determined by chiral HPLC on a Chiralpak AS-H column, Hex/IPA = 95:5, 1 mL/min, 220 nm, *t<sub>R</sub>* = 5.35 min (minor), *t<sub>S</sub>* = 7.54 min (major).

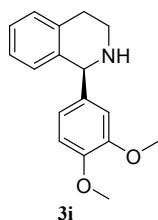

(*S*)-1-(3,4-dimethoxyphenyl)-1,2,3,4-tetrahydroisoquinoline<sup>2</sup> (**3i**): 133.33 mg, 92% yield, 87% *ee*, light yellow solid, **m.p.** 88.4 - 89.0 °C; <sup>1</sup>H NMR (400 MHz, CDCl<sub>3</sub>) δ 7.14 (d, *J* = 4.2 Hz, 2H), 7.04 (dt, *J* = 8.6, 4.3 Hz, 1H), 6.85 - 6.68 (m, 4H), 5.04 (s,

1H), 3.88 (s, 3H), 3.83 (s, 3H), 3.38 - 3.18 (m, 1H), 3.16 - 2.98 (m, 2H), 2.88 - 2.75 (m, 1H), 1.85(s, 1H). Enantiomeric excess was determined by chiral HPLC on a Chiralpak AS-H column, Hex/IPA = 95:5, 1 mL/min, 220 nm,  $t_R$  = 7.12 min (minor),  $t_S$  = 11.17 min (major).

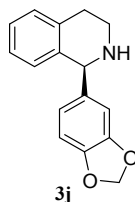

(*S*)-1-(benzo[d][1,3]dioxol-5-yl)-1,2,3,4-tetrahydroisoquinoline (**3j**): 124.12 mg, 81% yield, 89% *ee*, white solid, **m.p.** 72.0 - 73.3 °C;  $[\alpha]_D^{25}$  = -34.27 (*c* 0.25, CH<sub>2</sub>Cl<sub>2</sub>). **<sup>1</sup>H NMR** (400 MHz, CDCl<sub>3</sub>)  $\delta$  7.24 - 7.09 (m, 2H), 7.09 - 6.99 (m, 1H), 6.95 - 6.74 (m, 3H), 6.72 (s, 1H), 5.93 (s, 2H), 5.03 (s, 1H), 3.28 (m, 1H), 3.16 - 2.91 (m, 2H), 2.90 - 2.67 (m, 1H), 1.84(s, 1H). **<sup>13</sup>C NMR** (100 MHz, CDCl<sub>3</sub>)  $\delta$  129.01, 128.03, 126.27, 125.62, 122.30, 109.19, 107.84, 100.95, 61.82, 42.26, 29.74. **HRMS (ESI)** *m/z* Calculated for C<sub>16</sub>H<sub>16</sub>NO<sub>2</sub> [M+H]<sup>+</sup>: 254.1181, Found: 254.1178. Enantiomeric excess was determined by chiral HPLC on a Chiralpak AS-H column, Hex/IPA = 90:10, 1 mL/min, 220 nm,  $t_R$  = 7.85 min (minor),  $t_S$  = 21.04 min (major).

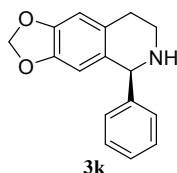

(*S*)-5-phenyl-5,6,7,8-tetrahydro-[1,3]dioxolo[4,5-g]isoquinoline<sup>5</sup> (**3k**) 120.32 mg, 82% yield, 90% *ee*, white solid, **m.p.** 107.3 - 108.6 °C;  $[\alpha]_D^{25}$  = -14.1 (*c* 0.27, CH<sub>2</sub>Cl<sub>2</sub>). **<sup>1</sup>H NMR** (400 MHz, CDCl<sub>3</sub>)  $\delta$  7.65 - 7.11 (m, 5H), 6.61 (s, 1H), 6.21 (s, 1H), 5.85 (s, 2H), 5.00 (s, 1H), 3.22 (m, 1H), 3.10 - 2.99 (m, 1H), 2.93 (m, 1H), 2.73 (m, 1H), 1.82(s, 1H). Enantiomeric excess was determined by chiral HPLC on a Chiralpak AS-H column, Hex/IPA = 95:5, 1 mL/min, 220 nm,  $t_R$  = 12.08 min (minor),  $t_S$  = 22.75 min (major).

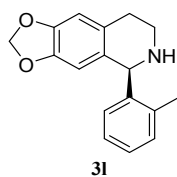

(*S*)-5-(2-methylphenyl)-5,6,7,8-tetrahydro-[1,3]dioxolo[4,5-*g*] isoquinoline (**3l**): 120.30 mg, 78% yield, 94% *ee*, colorless oil liquid;  $[\alpha]_D^{25} = -3.4$  (*c* 0.37, CH<sub>2</sub>Cl<sub>2</sub>). <sup>1</sup>H NMR (400 MHz, CDCl<sub>3</sub>)  $\delta$  7.24 - 7.07 (m, 3H), 7.03 (d, *J* = 7.6 Hz, 1H), 6.61 (s, 1H), 6.16 (s, 1H), 5.86 (s, 2H), 5.24 (s, 1H), 3.24 (m, 1H), 3.04 (m, 1H), 2.94 (m, 1H), 2.73 (m, 1H), 2.41 (s, 3H), 1.88 (s, 1H). <sup>13</sup>C NMR (100 MHz, CDCl<sub>3</sub>)  $\delta$  145.89, 145.72, 142.34, 136.57, 131.43, 130.80, 129.45, 128.62, 127.26, 125.94, 108.49, 107.49, 100.57, 58.84, 42.36, 29.88, 19.41. HRMS (ESI) *m/z* Calculated for C<sub>17</sub>H<sub>18</sub>NO<sub>2</sub> [M+H]<sup>+</sup>: 268.1338, Found: 268.1334. Enantiomeric excess was determined by chiral HPLC on a Chiralpak AS-H column, Hex/IPA = 95:5, 1 mL/min, 220 nm, *t<sub>R</sub>* = 8.51 min (minor), *t<sub>S</sub>* = 9.72 min (major).

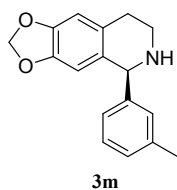

(*S*)-5-(3-methylphenyl)-5,6,7,8-tetrahydro-[1,3]dioxolo[4,5-*g*] isoquinoline (**3m**): 128.32 mg, 85% yield, 91% *ee*, white solid, **m.p.** 116.1 - 117.9 °C;  $[\alpha]_D^{25} = -27.1$  (*c* 0.25, CH<sub>2</sub>Cl<sub>2</sub>). <sup>1</sup>H NMR (400 MHz, CDCl<sub>3</sub>)  $\delta$  7.21 (t, *J* = 7.5 Hz, 1H), 7.16 - 6.87 (m, 3H), 6.60 (s, 1H), 6.22 (s, 1H), 5.85 (s, 2H), 4.95 (s, 1H), 3.31 - 3.18 (m, 1H), 3.09 - 2.88 (m, 2H), 2.71 (m, 1H), 2.33 (s, 3H), 1.85 (s, 1H). <sup>13</sup>C NMR (100MHz, CDCl<sub>3</sub>)  $\delta$  145.94, 145.55, 144.70, 138.12, 131.31, 129.47, 128.55, 128.26, 128.19, 125.95, 108.45, 107.97, 100.56, 62.11, 42.25, 29.88, 21.43. HRMS (ESI) *m/z* Calculated for C<sub>17</sub>H<sub>18</sub>NO<sub>2</sub> [M+H]<sup>+</sup>: 268.1338, Found: 268.1333. Enantiomeric excess was determined by chiral HPLC on a Chiralpak AS-H column, Hex/IPA = 95:5, 1 mL/min, 220 nm, *t<sub>R</sub>* = 8.56 min (minor), *t<sub>S</sub>* = 19.54 min (major).

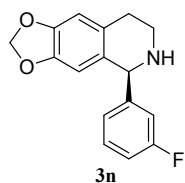

(*S*)-5-(3-fluorophenyl)-5,6,7,8-tetrahydro-[1,3]dioxolo[4,5-*g*] isoquinoline (**3n**): 132.93 mg, 82% yield, 94% *ee*, white solid, **m.p.** 118.0 - 118.5 °C;  $[\alpha]_D^{25} = -16.1$  (*c* 0.25, CH<sub>2</sub>Cl<sub>2</sub>). **<sup>1</sup>H NMR** (400 MHz, CDCl<sub>3</sub>)  $\delta$  7.35 – 7.27 (m, 1H), 7.07 (d, *J* = 7.7 Hz, 1H), 6.97 (t, *J* = 8.9 Hz, 2H), 6.61 (s, 1H), 6.21 (s, 1H), 5.87 (s, 2H), 5.00 (s, 1H), 3.20 (m, 1H), 3.03 (m, 1H), 2.92 (m, 1H), 2.72 (m, 1H), 1.76 (s, 1H). **<sup>13</sup>C NMR** (100 MHz, CDCl<sub>3</sub>)  $\delta$  162.87 (d, *J* = 246.1 Hz), 147.44 (d, *J* = 6.5 Hz), 146.18, 145.67, 130.38, 129.83 (d, *J* = 8.1 Hz), 128.64, 124.49, 115.70 (d, *J* = 21.4 Hz), 114.34 (d, *J* = 21.2 Hz), 108.60, 107.78, 100.66, 61.45, 41.86, 29.72. **<sup>19</sup>F NMR** (376 MHz, CDCl<sub>3</sub>)  $\delta$  -113.08. **HRMS (ESI)** *m/z* Calculated for C<sub>16</sub>H<sub>15</sub>FNO<sub>2</sub> [M+H]<sup>+</sup>: 272.1087, Found: 272.1083. Enantiomeric excess was determined by chiral HPLC on a Chiralpak AS-H column, Hex/IPA = 95:5, 1 mL/min, 220 nm, *t<sub>R</sub>* = 12.50 min (minor), *t<sub>S</sub>* = 24.08 min (major).

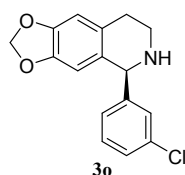

(*S*)-5-(3-chlorophenyl)-5,6,7,8-tetrahydro-[1,3]dioxolo[4,5-*g*] isoquinoline (**3o**): 142.43 mg, 81% yield, 93% *ee*, white solid, **m.p.** 114.3 - 115.9 °C;  $[\alpha]_D^{25} = -53.9$  (*c* 0.25, CH<sub>2</sub>Cl<sub>2</sub>). **<sup>1</sup>H NMR** (400 MHz, CDCl<sub>3</sub>)  $\delta$  7.25 (s, 3H), 7.15 (s, 1H), 6.61 (s, 1H), 6.19 (s, 1H), 5.87 (s, 2H), 4.97 (s, 1H), 3.19 (m, 1H), 3.02 (m, 1H), 2.97 - 2.81 (m, 1H), 2.72 (m, 1H), 1.84 (s, 1H). **<sup>13</sup>C NMR** (100 MHz, CDCl<sub>3</sub>)  $\delta$  146.89, 146.21, 145.69, 134.28, 130.25, 129.67, 128.94, 128.66, 127.62, 127.09, 108.62, 107.78, 100.67, 61.49, 41.89, 29.71. **HRMS (ESI)** *m/z* Calculated for C<sub>16</sub>H<sub>15</sub>ClNO<sub>2</sub> [M+H]<sup>+</sup>: 288.0791, Found: 288.0787. Enantiomeric excess was determined by chiral HPLC on a Chiralpak AS-H column, Hex/IPA = 90:10, 1 mL/min, 220 nm, *t<sub>R</sub>* = 8.30 min (minor), *t<sub>S</sub>* = 15.33 min (major).



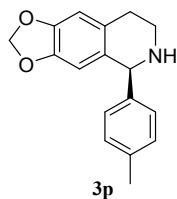

(*S*)-5-(4-methylphenyl)-5,6,7,8-tetrahydro-[1,3]dioxolo[4,5-*g*] isoquinoline<sup>5</sup> (**3p**): 126.98 mg, 90% yield, 85% *ee*, white solid, **m.p.** 81.5 - 83.2 °C;  $[\alpha]_D^{25} = -28.7$  (*c* 0.32, CH<sub>2</sub>Cl<sub>2</sub>). <sup>1</sup>H NMR (400 MHz, CDCl<sub>3</sub>)  $\delta$  7.13 (s, 4H), 6.60 (s, 1H), 6.22 (s, 1H), 5.84 (s, 2H), 4.96 (s, 1H), 3.22 (m, 1H), 3.02 (m, 1H), 2.92 (m, 1H), 2.71 (m, 1H), 2.34 (s, 3H), 1.87 (s, 1H). Enantiomeric excess was determined by chiral HPLC on a Chiralpak AS-H column, Hex/IPA = 95:5, 1 mL/min, 220 nm, *t<sub>R</sub>* = 8.97 min (minor), *t<sub>S</sub>* = 13.33 min (major).

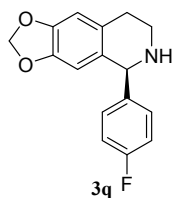

(*S*)-5-(4-fluorophenyl)-5,6,7,8-tetrahydro-[1,3]dioxolo[4,5-*g*] isoquinoline (**3q**): 134.29 mg, 86% yield, 90% *ee*, white solid, **m.p.** 102.9 - 104.1 °C;  $[\alpha]_D^{25} = -24.8$  (*c* 0.25, CH<sub>2</sub>Cl<sub>2</sub>). <sup>1</sup>H NMR (400 MHz, CDCl<sub>3</sub>)  $\delta$  7.44 - 7.12 (m, 2H), 7.00 (t, *J* = 8.5 Hz, 2H), 6.60 (s, 1H), 6.18 (s, 1H), 5.86 (s, 2H), 4.98 (s, 1H), 3.20 (m, 1H), 2.98 (m, 2H), 2.71 (m, 1H), 1.86 (s, 1H). <sup>13</sup>C NMR (100 MHz, CDCl<sub>3</sub>)  $\delta$  162.13 (d, *J* = 245.6 Hz), 146.11, 145.66, 140.63 (d, *J* = 3.1 Hz), 131.00, 130.41 (d, *J* = 8.0 Hz), 128.64, 115.24 (d, *J* = 21.3 Hz), 108.58, 107.80, 100.65, 61.33, 42.11, 29.81. <sup>19</sup>F NMR (376 MHz, CDCl<sub>3</sub>)  $\delta$  -115.24. **HRMS (ESI)** *m/z* Calculated for C<sub>16</sub>H<sub>15</sub>FNO<sub>2</sub> [M+H]<sup>+</sup>: 272.1087, Found: 272.1082. Enantiomeric excess was determined by chiral HPLC on a Chiralpak AS-H column, Hex/IPA = 95:5, 1 mL/min, 220 nm, *t<sub>R</sub>* = 12.53 min (minor), *t<sub>S</sub>* = 22.26 min (major).

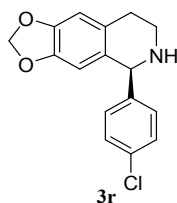

(*S*)-5-(4-chlorophenyl)-5,6,7,8-tetrahydro-[1,3]dioxolo[4,5-*g*] isoquinoline<sup>5</sup> (**3r**):

142.43 mg, 87% yield, 90% *ee*, white solid, **m.p.** 124.0 - 125.1 °C;  $[\alpha]_D^{25} = -41.9$  (*c* 0.34, CH<sub>2</sub>Cl<sub>2</sub>). **<sup>1</sup>H NMR** (400 MHz, CDCl<sub>3</sub>)  $\delta$  7.29 (d, *J* = 8.7 Hz, 2H), 7.20 (d, *J* = 8.6 Hz, 2H), 6.60 (s, 1H), 6.17 (s, 1H), 5.86 (s, 2H), 4.97 (s, 1H), 3.25 - 3.14 (m, 1H), 3.03 (m, 1H), 2.97 - 2.87 (m, 1H), 2.71 (m, 1H), 1.81 (s, 1H). Enantiomeric excess was determined by chiral HPLC on a Chiralpak AS-H column, Hex/IPA = 95:5, 1 mL/min, 220 nm, *t<sub>R</sub>* = 8.73 min (minor), *t<sub>S</sub>* = 12.04 min (major).

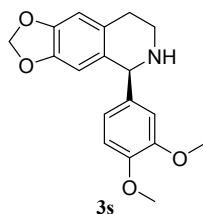

(*S*)-5-(3,4-dimethoxyphenyl)-5,6,7,8-tetrahydro-[1,3]dioxolo[4,5-g]isoquinoline<sup>5</sup> (**3s**): 148.84 mg, 92% yield, 88% *ee*, white solid, **m.p.** 79.5 - 80.5 °C;  $[\alpha]_D^{25} = -40.2$  (*c* 0.50, CH<sub>2</sub>Cl<sub>2</sub>). **<sup>1</sup>H NMR** (400 MHz, CDCl<sub>3</sub>)  $\delta$  6.94 - 6.72 (m, 3H), 6.60 (s, 1H), 6.23 (s, 1H), 5.86 (s, 2H), 4.93 (s, 1H), 3.86 (d, *J* = 13.6 Hz, 6H), 3.39 - 3.12 (m, 1H), 3.09 - 2.85 (m, 2H), 2.75 - 2.61 (m, 1H), 1.84 (s, 1H). Enantiomeric excess was determined by chiral HPLC on a Chiralpak AS-H column, Hex/IPA = 90:10, 1 mL/min, 220 nm, *t<sub>R</sub>* = 16.28 min (minor), *t<sub>S</sub>* = 30.78 min (major).

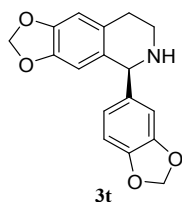

(*S*)-5-(benzo[d][1,3]dioxol-5-yl)-5,6,7,8-tetrahydro-[1,3]dioxolo[4,5-g] isoquinoline (**3t**): 141.22 mg, 82% yield, 92% *ee*, white solid, **m.p.** 136.7 - 139.2 °C;  $[\alpha]_D^{25} = -59.9$  (*c* 0.32, CH<sub>2</sub>Cl<sub>2</sub>). **<sup>1</sup>H NMR** (400 MHz, CDCl<sub>3</sub>)  $\delta$  6.75 (s, 2H), 6.71 (s, 1H), 6.59 (s, 1H), 6.24 (s, 1H), 5.94 (s, 2H), 5.86 (s, 2H), 4.92 (s, 1H), 3.40 - 3.10 (m, 1H), 3.09 - 2.86 (m, 2H), 2.70 (m, 1H), 1.78 (s, 1H). **<sup>13</sup>C NMR** (101 MHz, CDCl<sub>3</sub>)  $\delta$  147.77, 146.88, 146.05, 145.62, 138.93, 131.26, 128.61, 122.21, 109.10, 108.48, 107.90, 107.89, 100.98, 100.61, 61.80, 42.14, 29.84. **HRMS (ESI)** *m/z* Calculated for C<sub>17</sub>H<sub>16</sub>NO<sub>4</sub> [M+H]<sup>+</sup>: 298.1079, Found: 298.1079. Enantiomeric excess was

determined by chiral HPLC on a Chiralpak AS-H column, Hex/IPA = 80:20, 1 mL/min, 220 nm,  $t_R$  = 11.03 min (minor),  $t_S$  = 25.88 min (major).

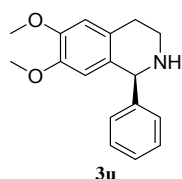

(*S*)-6,7-dimethoxy-1-phenyl-1,2,3,4-tetrahydroisoquinoline<sup>6</sup> (**3u**): 133.33 mg, 91% yield, 90% *ee*, white solid, **m.p.** 126.6 - 127.6 °C; <sup>1</sup>H NMR (400 MHz, CDCl<sub>3</sub>)  $\delta$  7.30 (m, 5H), 6.64 (s, 1H), 6.25 (s, 1H), 5.05 (s, 1H), 3.88 (m, 3H), 3.64 (m, 3H), 3.22 (m, 1H), 3.05 (m, 1H), 2.94 (m, 1H), 2.76 (m, 1H), 1.87(s,1H). Enantiomeric excess was determined by chiral HPLC on a Chiralpak AS-H column, Hex/IPA = 95:5, 1 mL/min, 220 nm,  $t_S$  = 10.33 min (major),  $t_R$  = 15.97 min (minor).

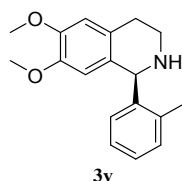

(*S*)-6,7-dimethoxy-1-(2-methylphenyl)-1,2,3,4-tetrahydro isoquinoline<sup>6</sup> (**3v**): 127.52 mg, 81% yield, 96% *ee*, light yellow oil; <sup>1</sup>H NMR (400 MHz, CDCl<sub>3</sub>)  $\delta$  7.17 (h,  $J$  = 7.0, 6.4 Hz, 2H), 7.12 - 7.04 (m, 1H), 6.98 (d,  $J$  = 7.6 Hz, 1H), 6.63 (s, 1H), 6.19 (s, 1H), 5.28 (s, 1H), 3.87 (s, 3H), 3.62 (s, 3H), 3.21 (m, 1H), 3.04 (m, 1H), 2.92 (m, 1H), 2.81 - 2.70 (m, 1H), 2.43 (s, 3H) , 2.06(s,1H). Enantiomeric excess was determined by chiral HPLC on a Chiralpak AD-H column, Hex/IPA = 90:10, 1 mL/min, 220 nm,  $t_S$  = 7.47 min (major),  $t_R$  = 10.42 min (minor).

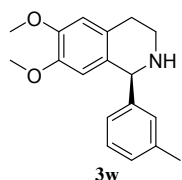

(*S*)-6,7-dimethoxy-1-(3-methylphenyl)-1,2,3,4-tetrahydro isoquinoline<sup>6</sup> (**3w**): 140.27 mg, 92% yield, 95% *ee*, white solid, **m.p.** 113.4 - 113.6 °C; <sup>1</sup>H NMR (400 MHz, CDCl<sub>3</sub>)  $\delta$  7.21 (t,  $J$  = 7.6 Hz, 1H), 7.09 (d,  $J$  = 7.9 Hz, 2H), 7.03 (d,  $J$  = 7.5 Hz,

1H), 6.63 (s, 1H), 6.26 (s, 1H), 5.01 (s, 1H), 3.88 (s, 3H), 3.64 (s, 3H), 3.26 - 3.16 (m, 1H), 3.04 (m, 1H), 2.93 (m, 1H), 2.75 (m, 1H), 2.32 (s, 3H), 1.89(s,1H). Enantiomeric excess was determined by chiral HPLC on a Chiralpak AS-H column, Hex/IPA = 95:5, 1 mL/min, 220 nm,  $t_S = 7.97$  min (major),  $t_R = 9.86$  min (minor).

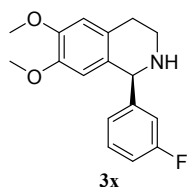

(*S*)-6,7-dimethoxy-1-(3-fluorophenyl)-1,2,3,4-tetrahydro isoquinoline<sup>6</sup> (**3x**): 142.23 mg, 92% yield, 90% *ee*, white solid, **m.p.** 118.0 - 119.6 °C; <sup>1</sup>H NMR (400 MHz, CDCl<sub>3</sub>)  $\delta$  7.29 (m, 1H), 7.06 (d,  $J = 7.7$  Hz, 1H), 6.97 (t,  $J = 8.6$  Hz, 2H), 6.64 (s, 1H), 6.24 (s, 1H), 5.05 (s, 1H), 3.88 (s, 3H), 3.66 (s, 3H), 3.26 - 3.14 (m, 1H), 3.11 - 2.99 (m, 1H), 2.92 (m, 1H), 2.81 - 2.66 (m, 1H), 1.86(s,1H). Enantiomeric excess was determined by chiral HPLC on a Chiralpak AS-H column, Hex/IPA = 95:5, 1 mL/min, 220 nm,  $t_S = 10.46$  min (major),  $t_R = 14.96$  min (minor).

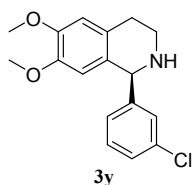

(*S*)-6,7-dimethoxy-1-(3-chlorophenyl)-1,2,3,4-tetrahydro isoquinoline<sup>7</sup> (**3y**): 147.34 mg, 93% yield, 90% *ee*, white solid, **m.p.** 102.9 - 103.8 °C; <sup>1</sup>H NMR (400 MHz, CDCl<sub>3</sub>)  $\delta$  7.36 - 7.19 (m, 3H), 7.20 - 7.06 (m, 1H), 6.64 (s, 1H), 6.22 (s, 1H), 5.02 (s, 1H), 3.88 (s, 3H), 3.66 (s, 3H), 3.19 ((m, 1H), 3.04 ((m, 1H), 2.92 ((m, 1H), 2.75 ((m, 1H), 1.89(s,1H). Enantiomeric excess was determined by chiral HPLC on a Chiralpak AS-H column, Hex/IPA = 90:10, 1 mL/min, 220 nm,  $t_S = 7.02$  min (major),  $t_R = 8.46$  min (minor).

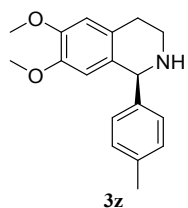

(*S*)-6,7-dimethoxy-1-(4-methylphenyl)-1,2,3,4-tetrahydro isoquinoline<sup>6</sup> (**3z**): 140.27 mg, 96% yield, 92% *ee*, white solid, **m.p.** 119.2 - 120.7 °C; <sup>1</sup>H NMR (400 MHz, CDCl<sub>3</sub>) δ 7.13 (s, 4H), 6.63 (s, 1H), 6.26 (s, 1H), 5.02 (s, 1H), 3.87 (s, 3H), 3.64 (s, 3H), 3.26 - 3.15 (m, 1H), 3.03 (m, 1H), 2.92 (m, 1H), 2.75 (m, 1H), 2.34 (s, 3H), 1.82(s,1H). Enantiomeric excess was determined by chiral HPLC on a Chiralpak AS-H column, Hex/IPA = 95:5, 1 mL/min, 220 nm, *t*<sub>S</sub> = 7.56 min (major), *t*<sub>R</sub> = 11.07 min (minor).

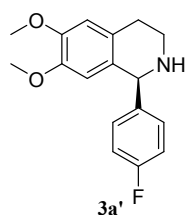

(*S*)-6,7-dimethoxy-1-(4-fluorophenyl)-1,2,3,4-tetrahydro isoquinoline<sup>6</sup> (**3a'**): 140.79 mg, 95% yield, 85% *ee*, white solid, **m.p.** 132.6 - 133.4 °C; <sup>1</sup>H NMR (400 MHz, CDCl<sub>3</sub>) δ 7.26 - 7.17 (m, 2H), 7.01 (t, *J* = 8.1 Hz, 3H), 6.63 (s, 1H), 6.20 (s, 1H), 5.03 (s, 1H), 3.88 (s, 3H), 3.65 (s, 3H), 3.21 (m, 1H), 3.05 (m, 1H), 2.94 (m, 1H), 2.74 (m, 1H), 1.84(s,1H). Enantiomeric excess was determined by chiral HPLC on a Chiralpak AS-H column, Hex/IPA = 95:5, 1 mL/min, 220 nm, *t*<sub>S</sub> = 10.62 min (major), *t*<sub>R</sub> = 14.54 min (minor).

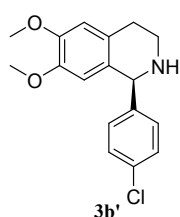

(*S*)-6,7-dimethoxy-1-(4-chlorophenyl)-1,2,3,4-tetrahydro isoquinoline<sup>6</sup> (**3b'**): 150.37 mg, 94% yield, 87% *ee*, white solid, **m.p.** 122.9 - 130.4 °C; <sup>1</sup>H NMR (400 MHz, CDCl<sub>3</sub>) δ 7.35 - 7.24 (m, 2H), 7.20 (d, *J* = 8.6 Hz, 2H), 6.63 (s, 1H), 6.20 (s, 1H), 5.02 (s, 1H), 3.88 (s, 3H), 3.65 (s, 3H), 3.19 (m, 1H), 3.04 (m, 1H), 2.92 (m, 1H), 2.74 (m, 1H), 1.75(s,1H). Enantiomeric excess was determined by chiral HPLC on a Chiralpak AS-H column, Hex/IPA = 90:10, 1 mL/min, 220 nm, *t*<sub>S</sub> = 6.73 min (major), *t*<sub>R</sub> = 8.45 min (minor).

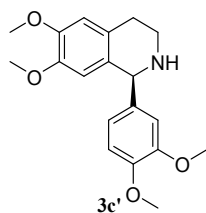

(*S*)-6,7-dimethoxy-1-(3,4-dimethylphenyl)-1,2,3,4-tetrahydro isoquinoline<sup>6</sup> (**3c'**): 161.40 mg, 91% yield, 99% *ee*, white solid, **m.p.** 108.0 - 112.3 °C; <sup>1</sup>H NMR (400 MHz, CDCl<sub>3</sub>) δ 6.89 - 6.76 (m, 3H), 6.63 (s, 1H), 6.27 (s, 1H), 4.99 (s, 1H), 3.88 (s, 6H), 3.83 (s, 3H), 3.65 (s, 3H), 3.38 - 3.15 (m, 1H), 3.15 - 2.84 (m, 2H), 2.74 (m, 1H), 1.80(s,1H). Enantiomeric excess was determined by chiral HPLC on a Chiralpak AS-H column, Hex/IPA = 90:10, 1 mL/min, 220 nm, *t*<sub>S</sub> = 11.85 min (major), *t*<sub>R</sub> = 14.74 min (minor).

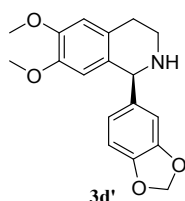

(*S*)-1-(benzo[d][1,3]dioxol-5-yl)-6,7-dimethoxy-1,2,3,4-tetrahydro isoquinoline<sup>8</sup> (**3d'**): 151.98 mg, 87% yield, 87.5% *ee*, white solid, **m.p.** 117.5 - 118.2 °C; <sup>1</sup>H NMR (400 MHz, CDCl<sub>3</sub>) δ 6.83 - 6.67 (m, 3H), 6.62 (s, 1H), 6.27 (s, 1H), 5.94 (s, 2H), 4.97 (s, 1H), 3.87 (s, 3H), 3.67 (s, 3H), 3.27 - 3.16 (m, 1H), 3.03 (m, 1H), 2.92 (m, 1H), 2.73 (m, 1H), 1.86 (s, 1H). Enantiomeric excess was determined by chiral HPLC on a Chiralpak AS-H column, Hex/IPA = 90:10, 1 mL/min, 220 nm, *t*<sub>S</sub> = 14.68 min (major), *t*<sub>R</sub> = 24.34 min (minor).

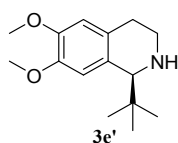

(*S*)-1-(*tert*-butyl)-6,7-dimethoxy-1,2,3,4-tetrahydroisoquinoline<sup>9</sup> (**3e'**): 107.2 mg, 86% yield, 98% *ee*, colorless oil. <sup>1</sup>H NMR (400 MHz, CDCl<sub>3</sub>) δ 6.67 (s, 1H), 6.58 (s, 1H), 3.85 (d, *J* = 7.9 Hz, 6H), 3.79 (s, 1H), 3.25 (dt, *J* = 9.9, 3.6 Hz, 1H), 2.80-2.63 (m, 2H), 2.52 (dt, *J* = 14.7, 2.8 Hz, 1H), 1.70 (s, 1H), 0.94 (s, 9H). Enantiomeric

excess was determined by chiral HPLC on a Chiralpak AS-H column, Hex/IPA = 80:20, 1 mL/min, 220 nm,  $t_S$  = 18.57 min (major),  $t_R$  = 33.54 min (minor).

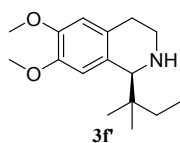

(*S*)-6,7-dimethoxy-1-(*tert*-pentyl)-1,2,3,4-tetrahydroisoquinoline (**3f'**): 114.6 mg, 87% yield, 97% *ee*, colorless oil;  $[\alpha]_D^{25}$  = -12.6 (*c* 0.12, CH<sub>2</sub>Cl<sub>2</sub>). **<sup>1</sup>H NMR** (400 MHz, CDCl<sub>3</sub>)  $\delta$  6.66 (s, 1H), 6.58 (s, 1H), 3.90 (s, 1H), 3.86 (s, 3H), 3.84 (s, 3H), 3.31-3.13 (m, 1H), 2.80 - 2.65 (m, 2H), 2.59 - 2.45 (m, 1H), 1.63 (s, 1H), 1.52 (dq, *J* = 14.8, 7.5 Hz, 1H), 1.25 (dq, *J* = 14.5, 7.5 Hz, 1H), 0.94 - 0.85 (m, 6H), 0.83 (s, 3H). **<sup>13</sup>C NMR** (101 MHz, CDCl<sub>3</sub>)  $\delta$  146.91, 145.99, 131.13, 128.48, 112.78, 111.38, 62.26, 55.94, 55.75, 42.82, 39.79, 31.58, 31.17, 24.81, 23.77, 8.40. **HRMS (ESI) *m/z*** Calculated for C<sub>16</sub>H<sub>25</sub>NO<sub>2</sub> [M+H]<sup>+</sup>: 264.1964, Found: 264.1959. Enantiomeric excess was determined by chiral HPLC on a Chiralpak AS-H column, Hex/IPA = 80:20, 1 mL/min, 220 nm,  $t_S$  = 17.15 min (major),  $t_R$  = 28.67 min (minor).

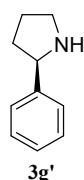

(*R*)-2-phenylpyrrolidine (**3g'**):<sup>4</sup> 138.2 mg, 94% yield, 35% *ee*, colourless oil. **<sup>1</sup>H NMR** (400 MHz, CDCl<sub>3</sub>)  $\delta$  7.39 - 7.28 (m, 4H), 7.26 - 7.19 (m, 1H), 4.10 (t, *J* = 7.7 Hz, 1H), 3.24 - 3.14 (m, 1H), 3.04 - 2.94 (m, 1H), 2.25 - 2.11 (m, 1H), 1.98 - 1.81 (m, 3H), 1.74 - 1.57 (m, 1H).

## 4. NMR spectra and HRMS

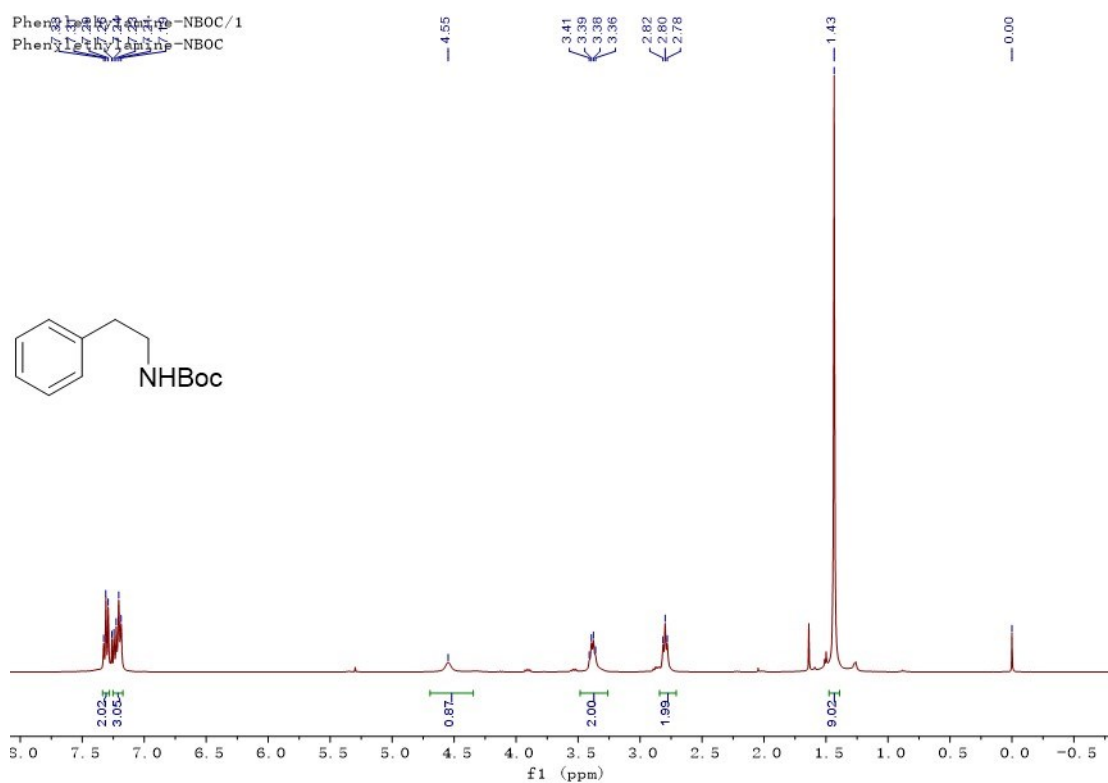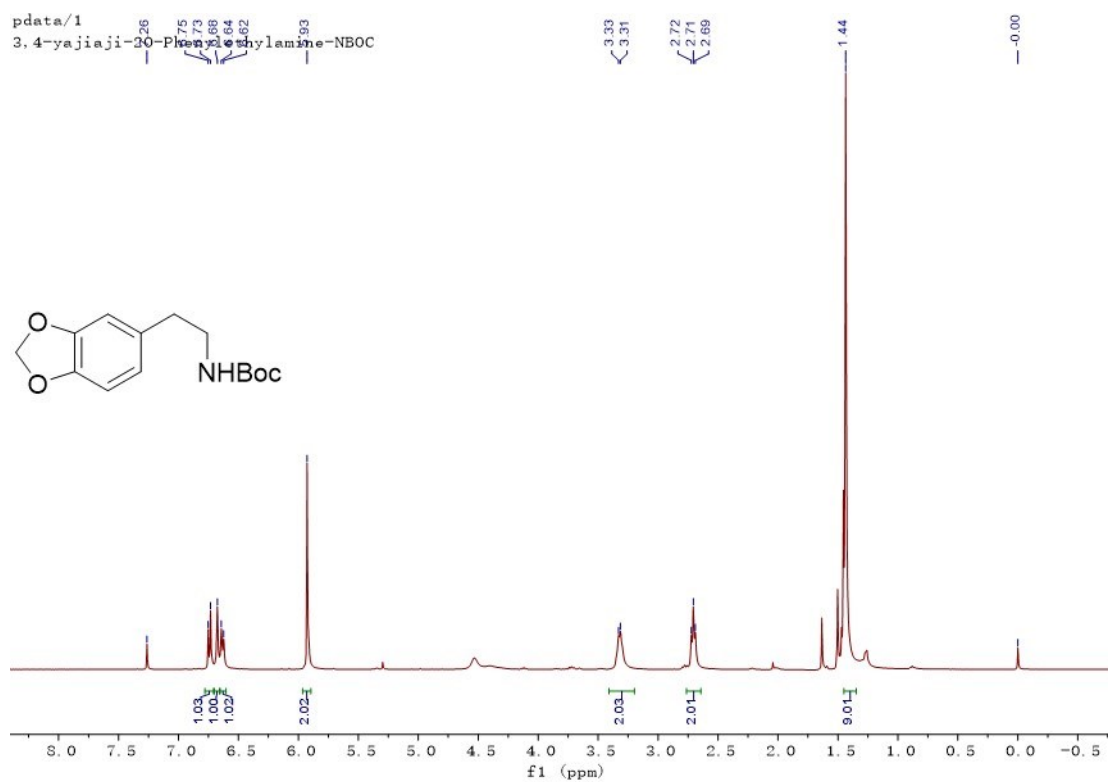



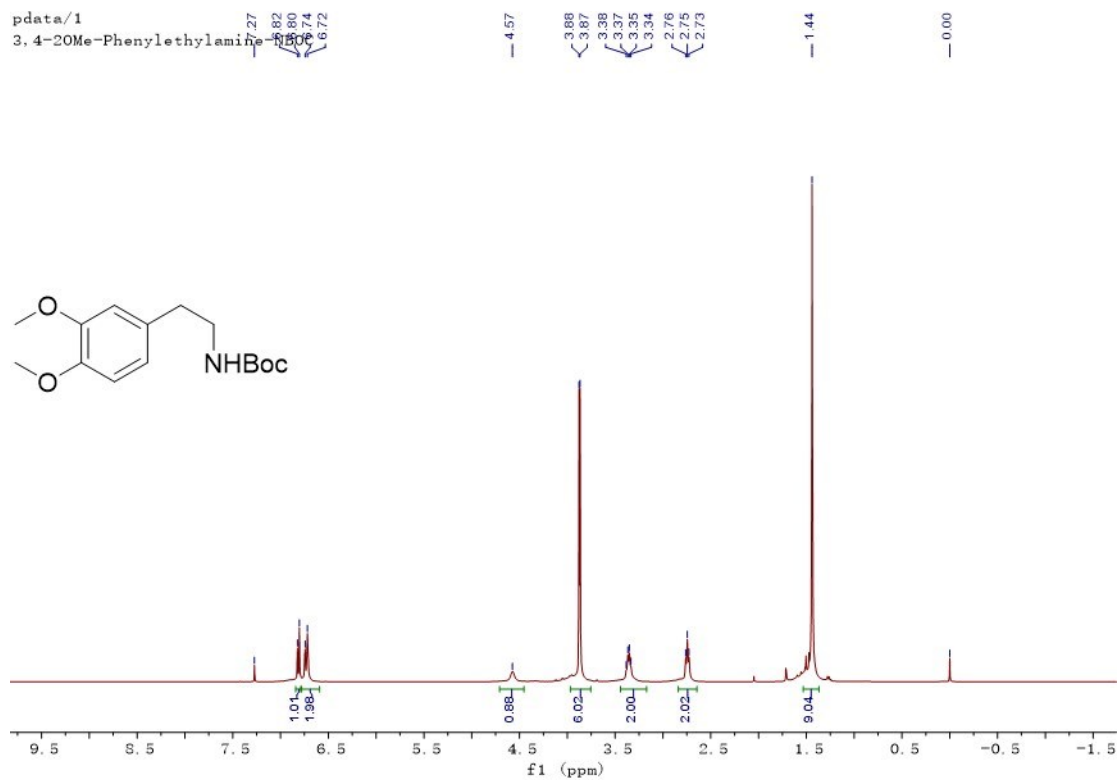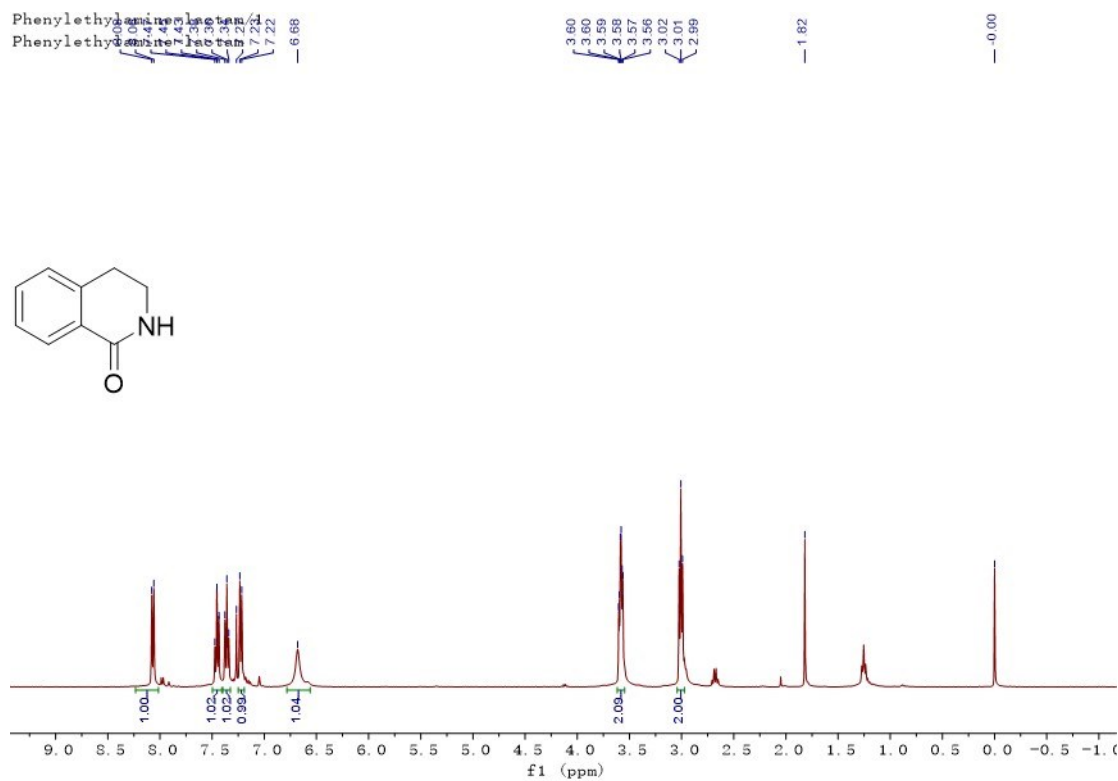

3,4-yajiaji-20-lactam. 1. 1. 1r  
3,4-yajiaji-20-lactam

-7.51  
-7.27

-6.65  
-6.60

-6.00

3.54  
3.54  
3.53  
3.52  
3.51  
3.50  
2.91  
2.89  
2.88

-0.00

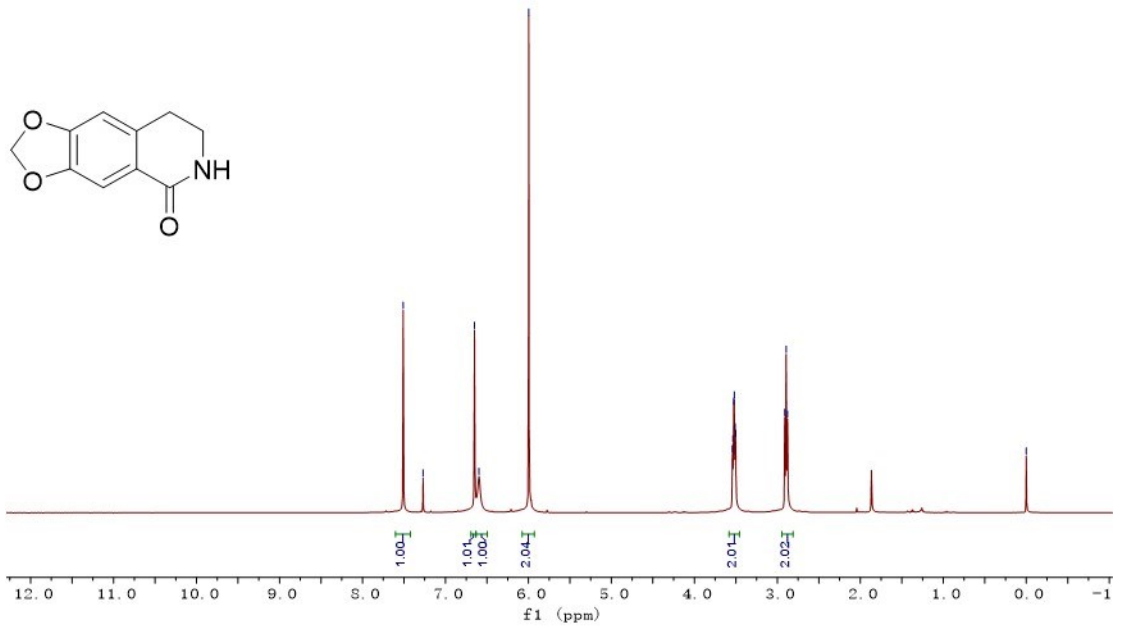

pdata/1

3,4-20Me-lactam

-7.59  
-7.27

-6.70

4.21

4.19

4.18

3.97

3.92

3.13

3.12

3.10

-0.00

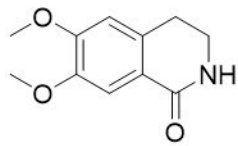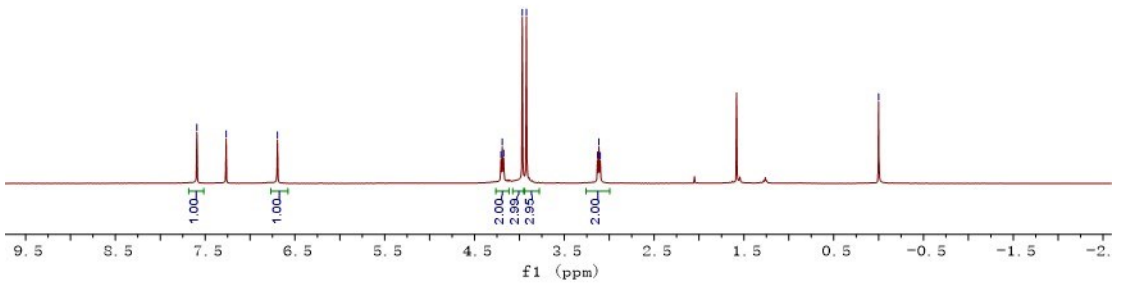

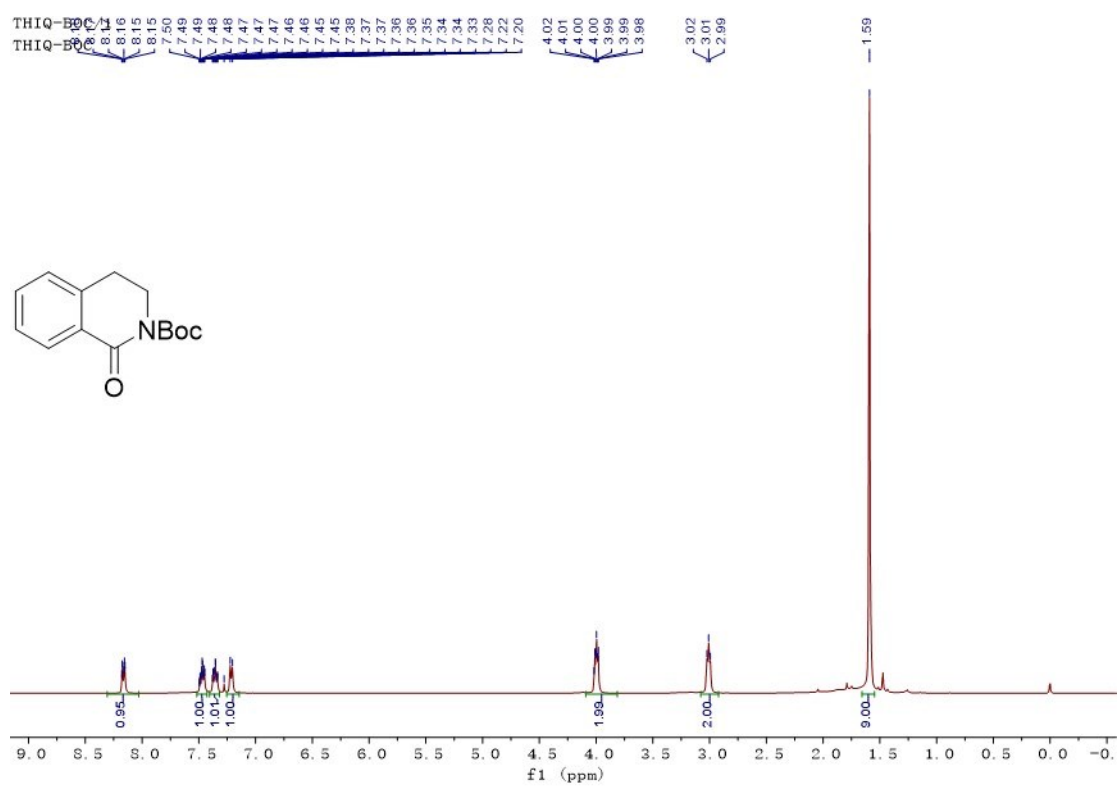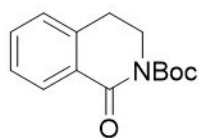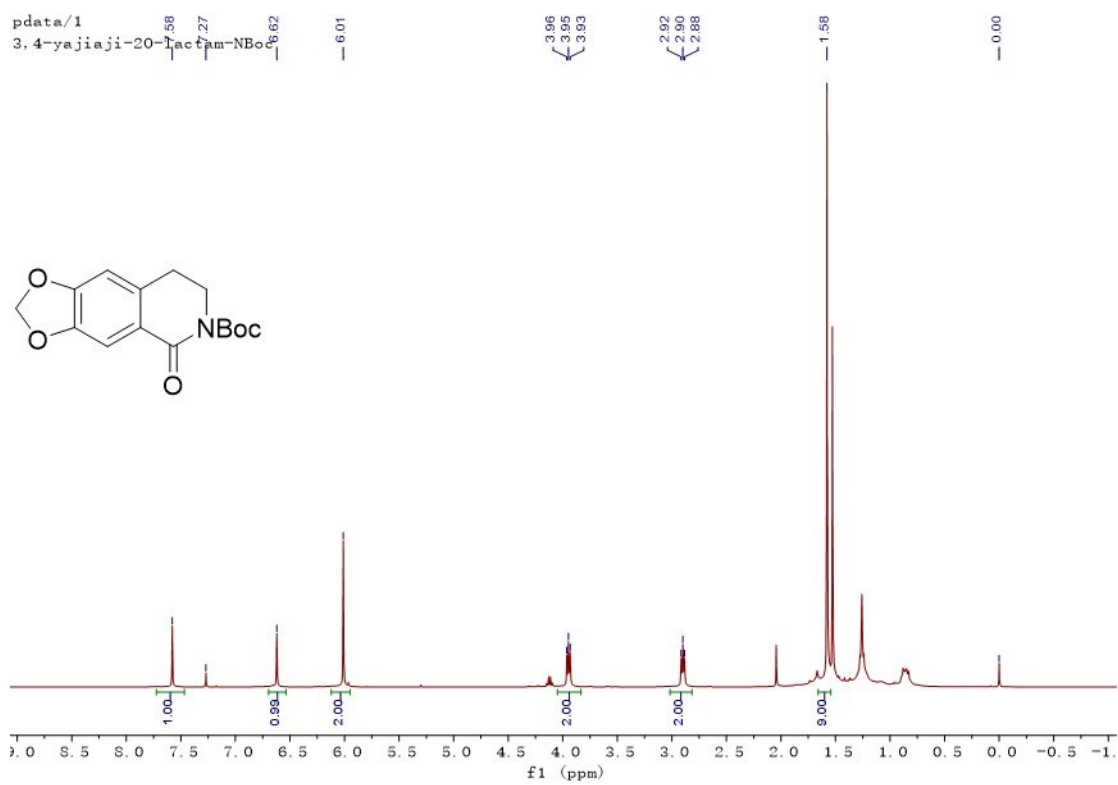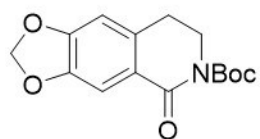

3,4-yajiaji-20-lactam-NBoc/4  
 3,4-yajiaji-20-lactam-NBoc

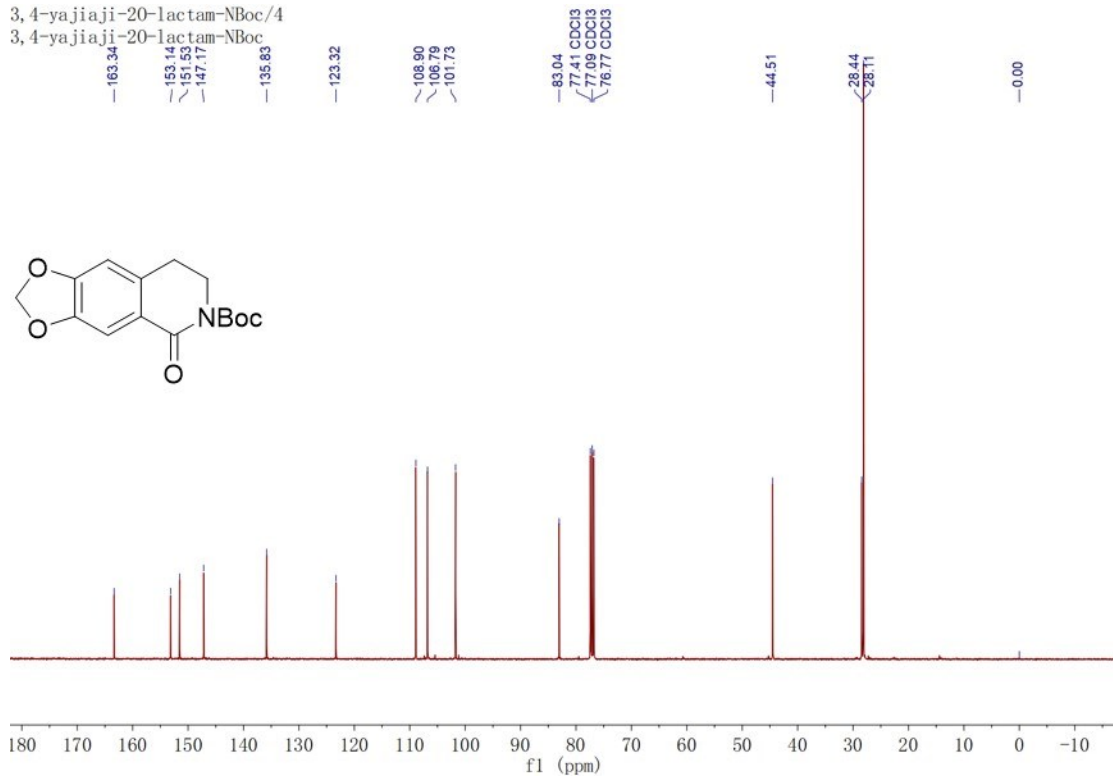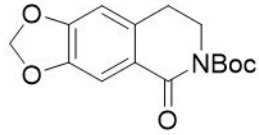

| Sample Name   | Position           | p1C2       | Instrument Name     | Instrument 1 | User Name              | G6520B-PC\Admin      |
|---------------|--------------------|------------|---------------------|--------------|------------------------|----------------------|
| Inj Vol       | 0.1                |            | SampleType          | Sample       | IRM Calibration Status | Success              |
| Data Filename | LRX-20201102-1-p.d | ACQ Method | 20110418-M5only-p.m | Comment      | Acquired Time          | 11/5/2020 1:41:05 PM |

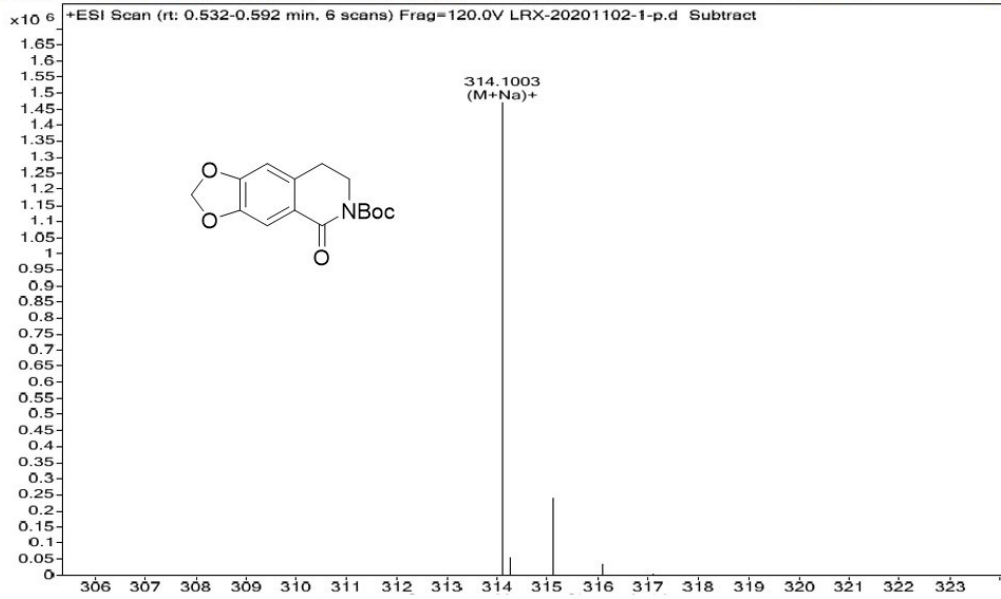

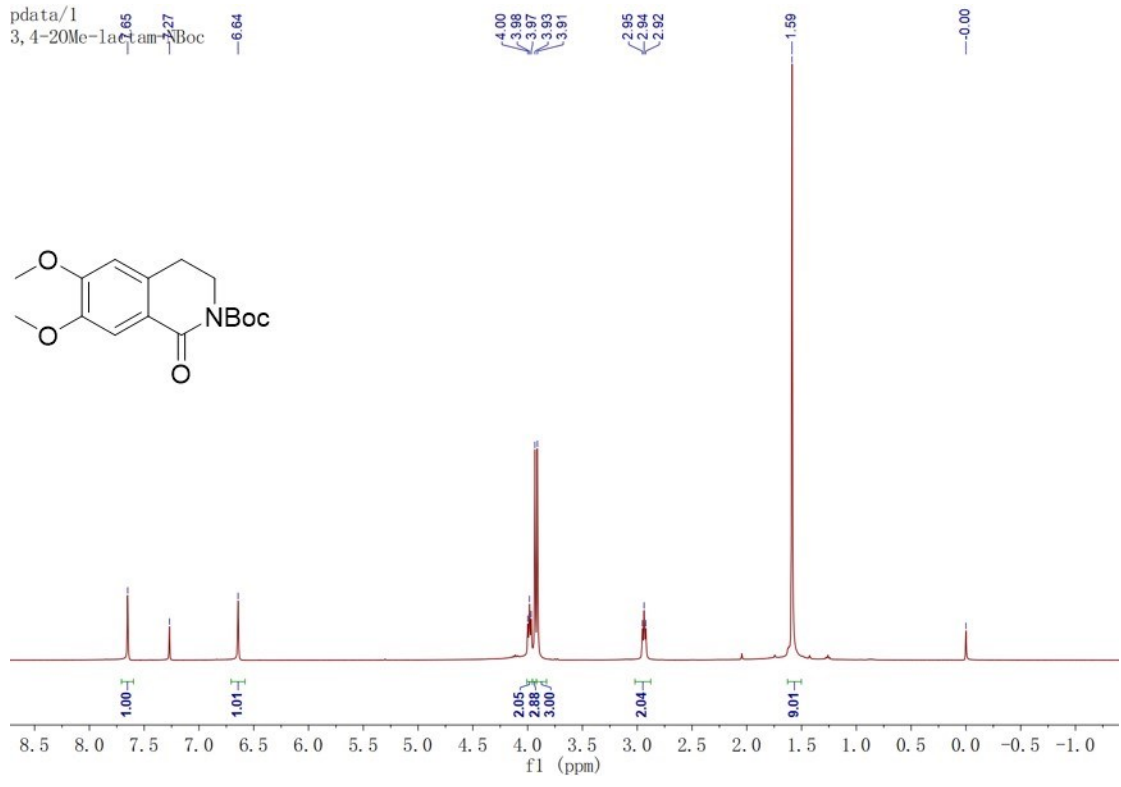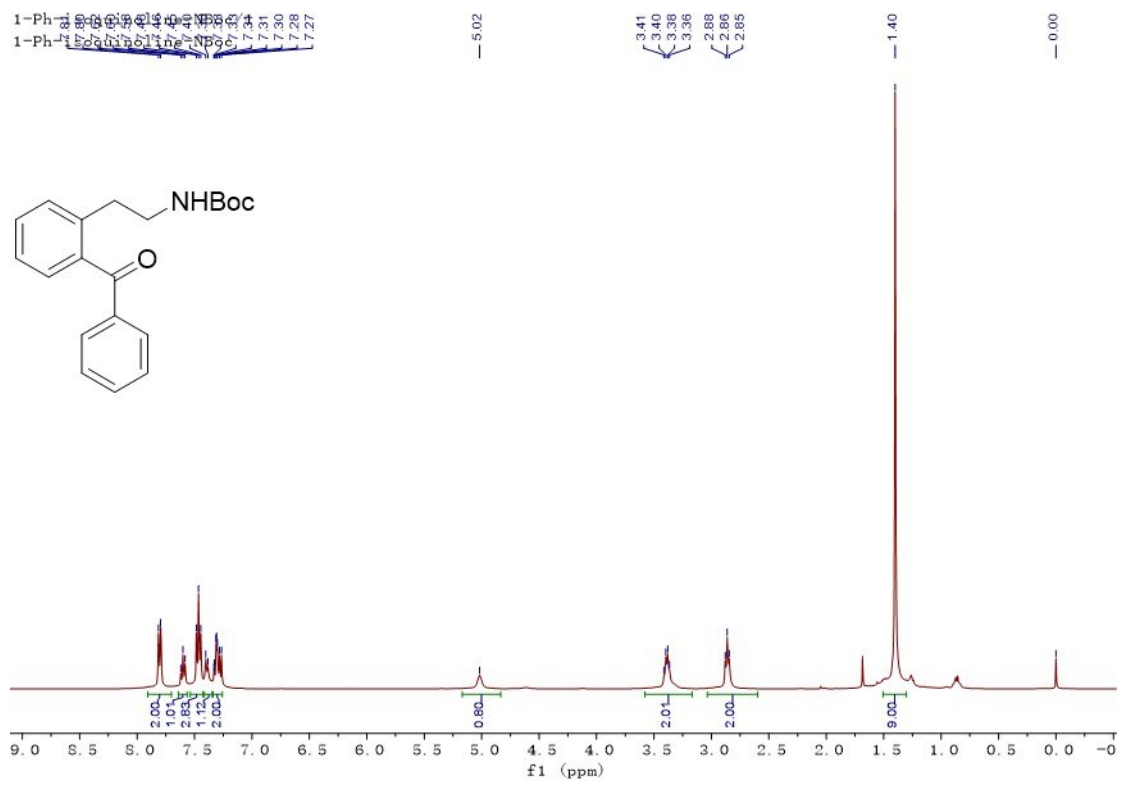

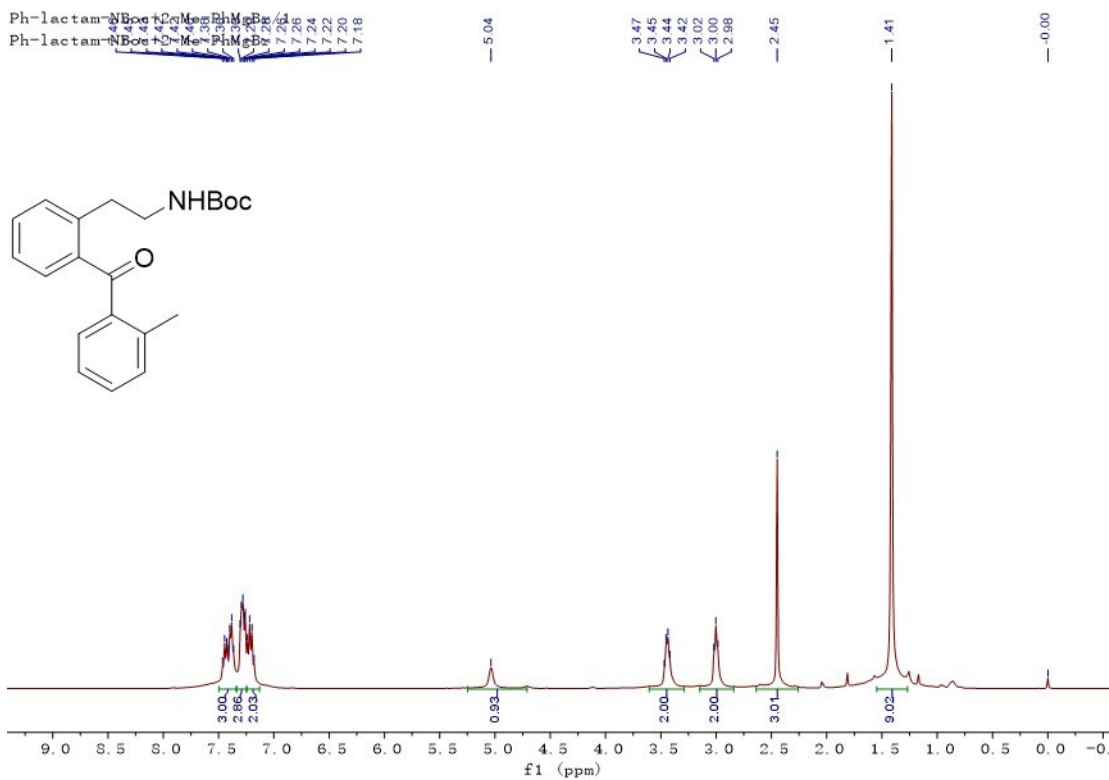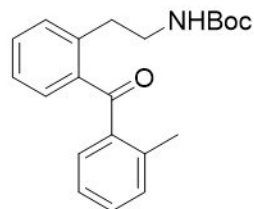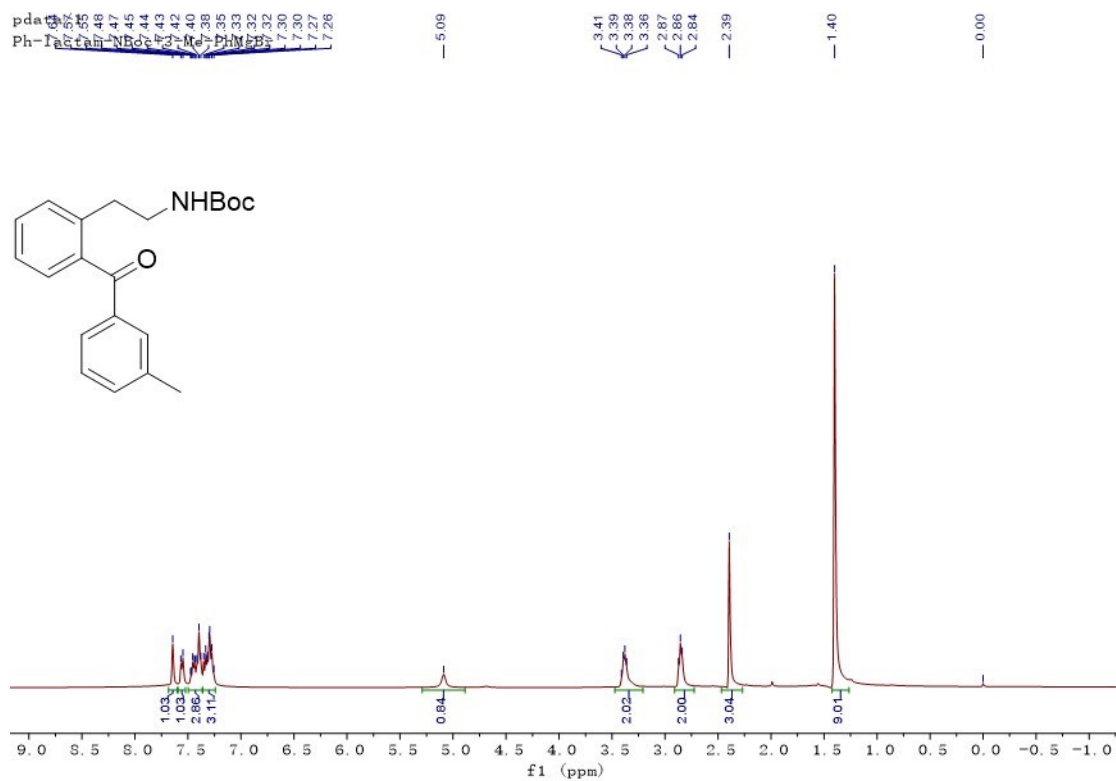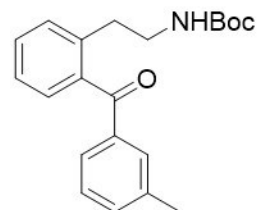

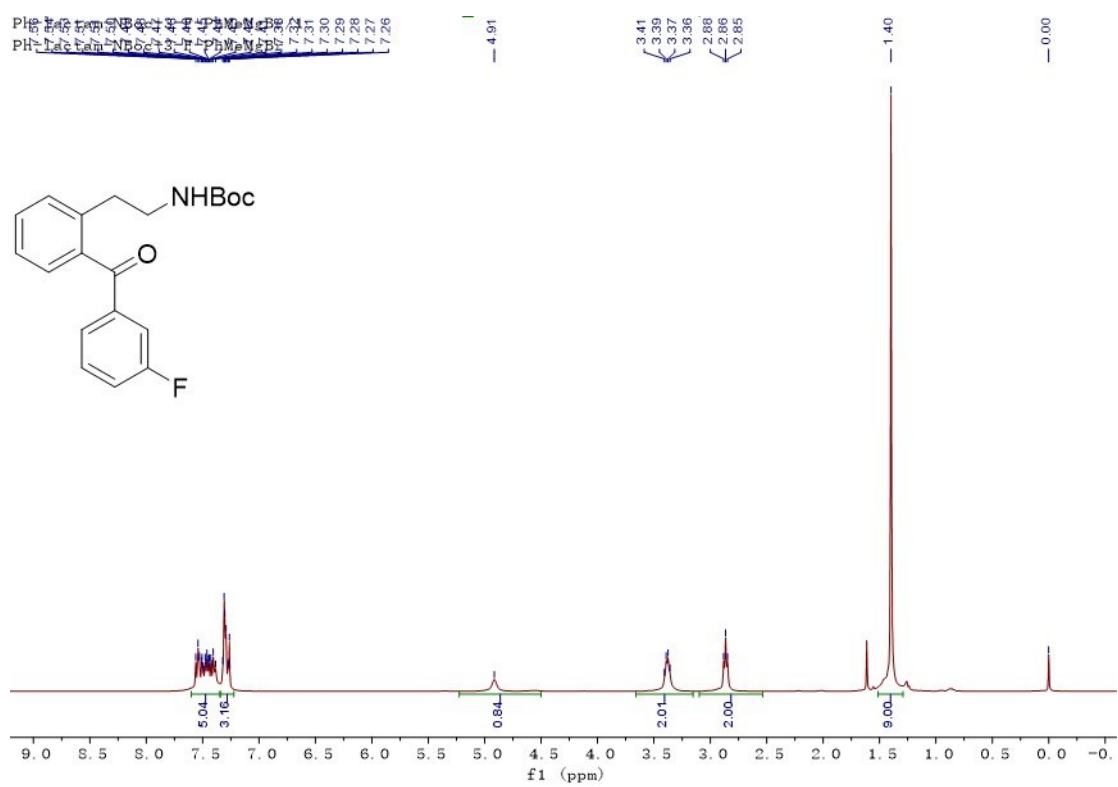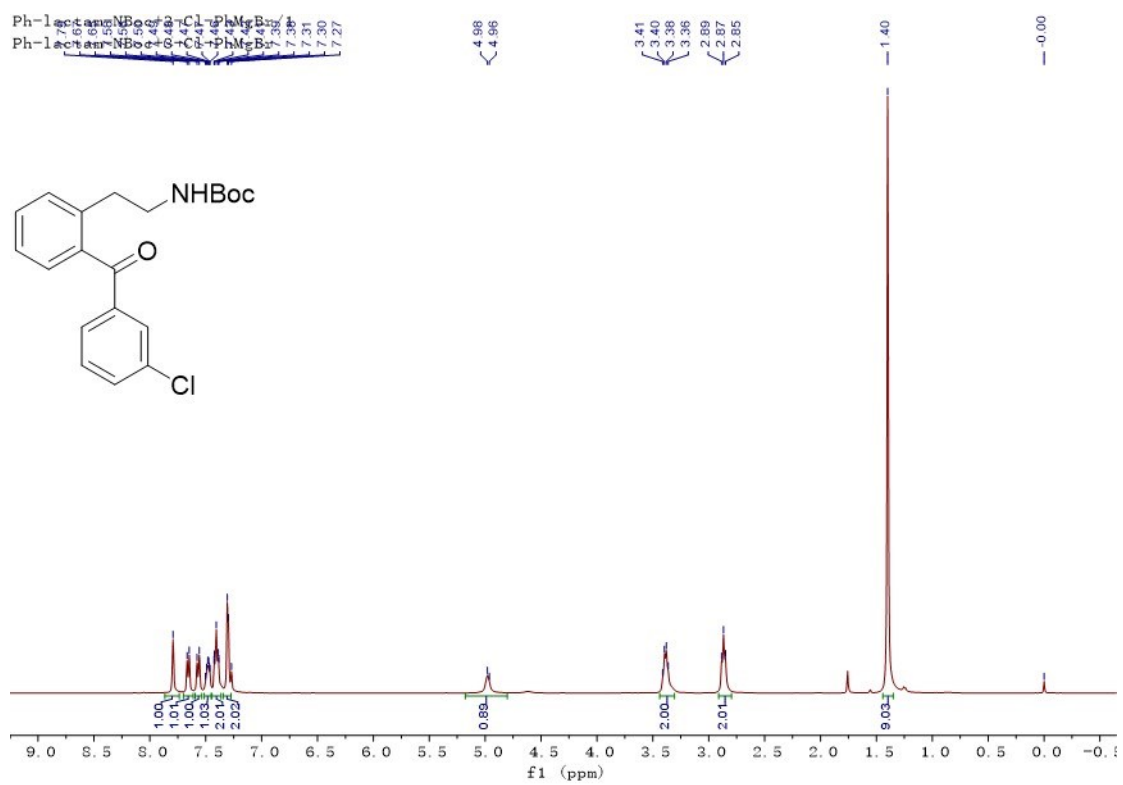

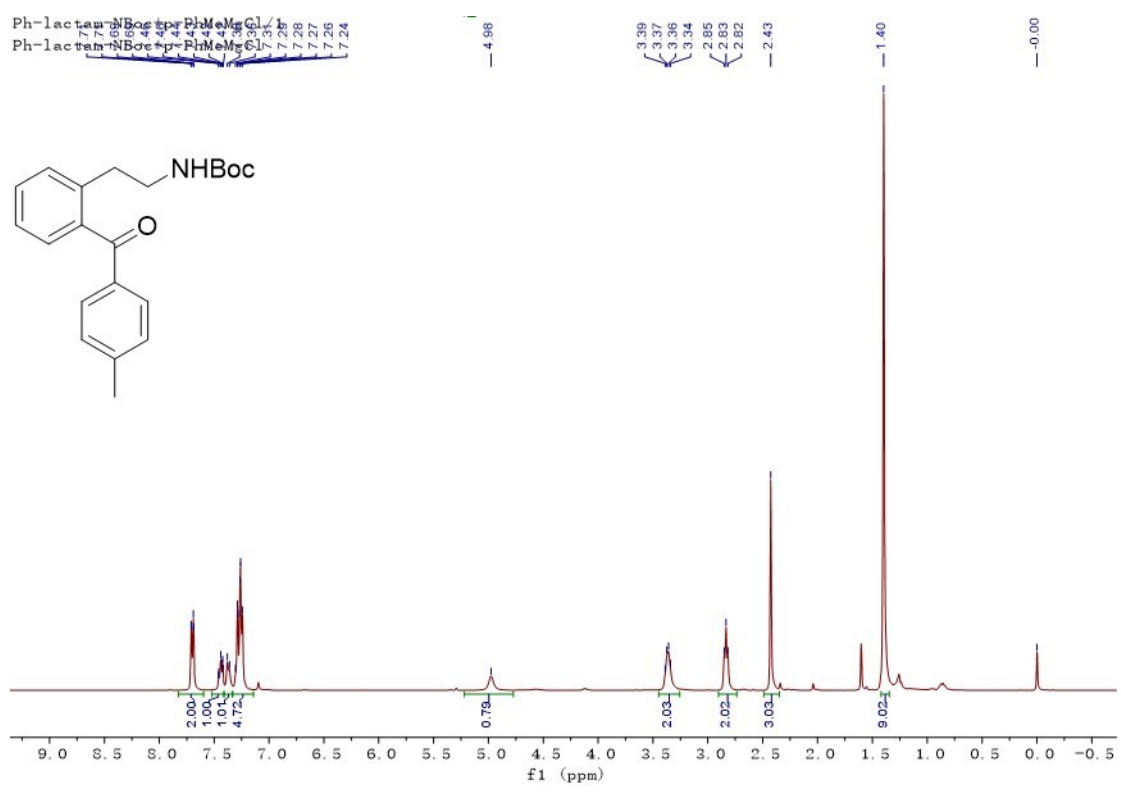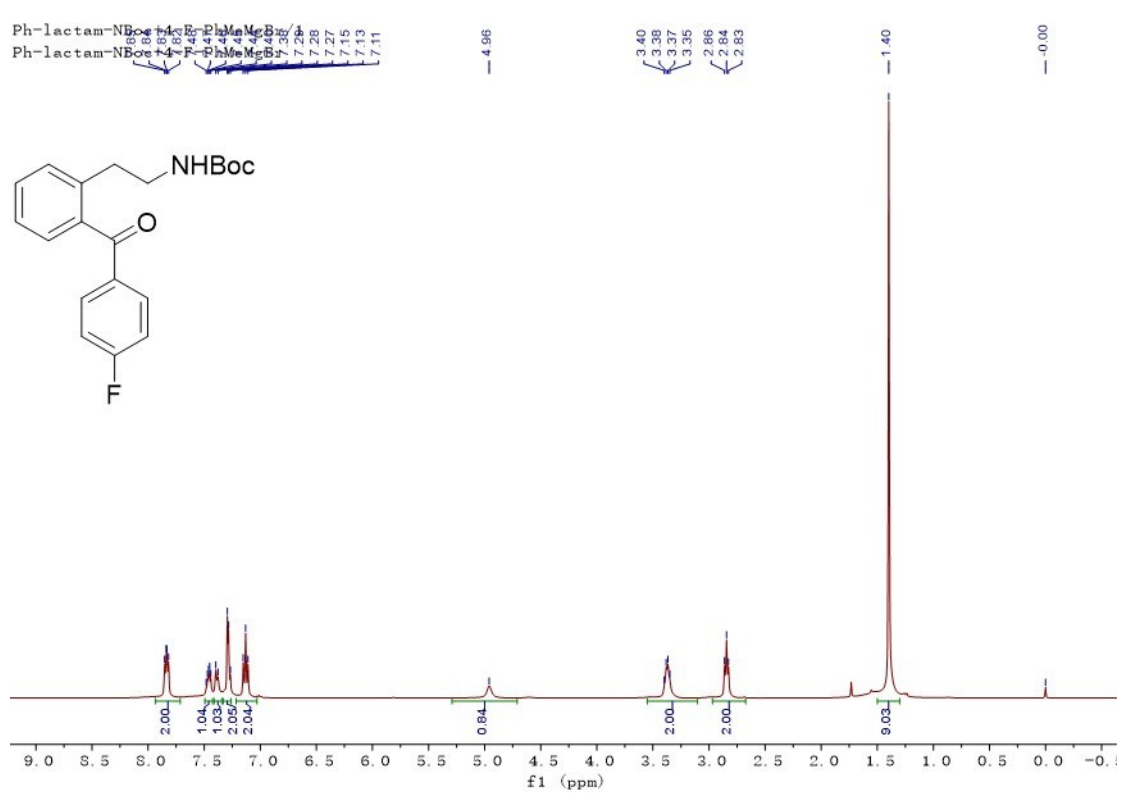



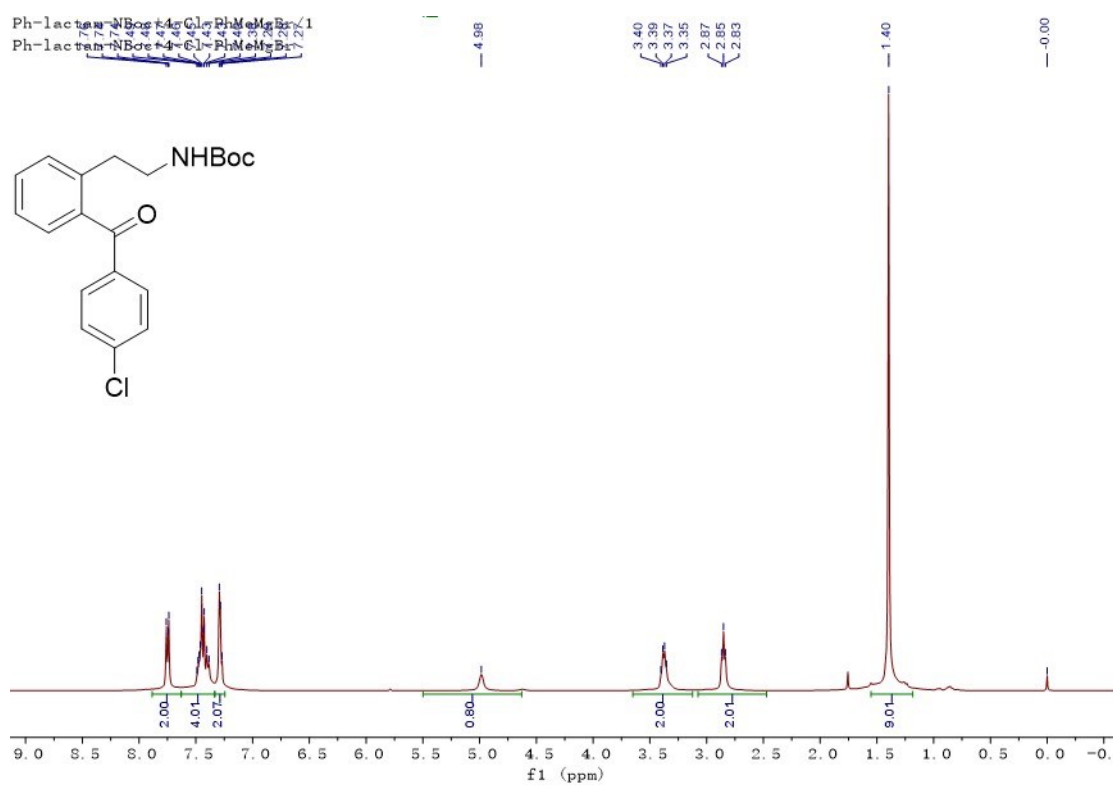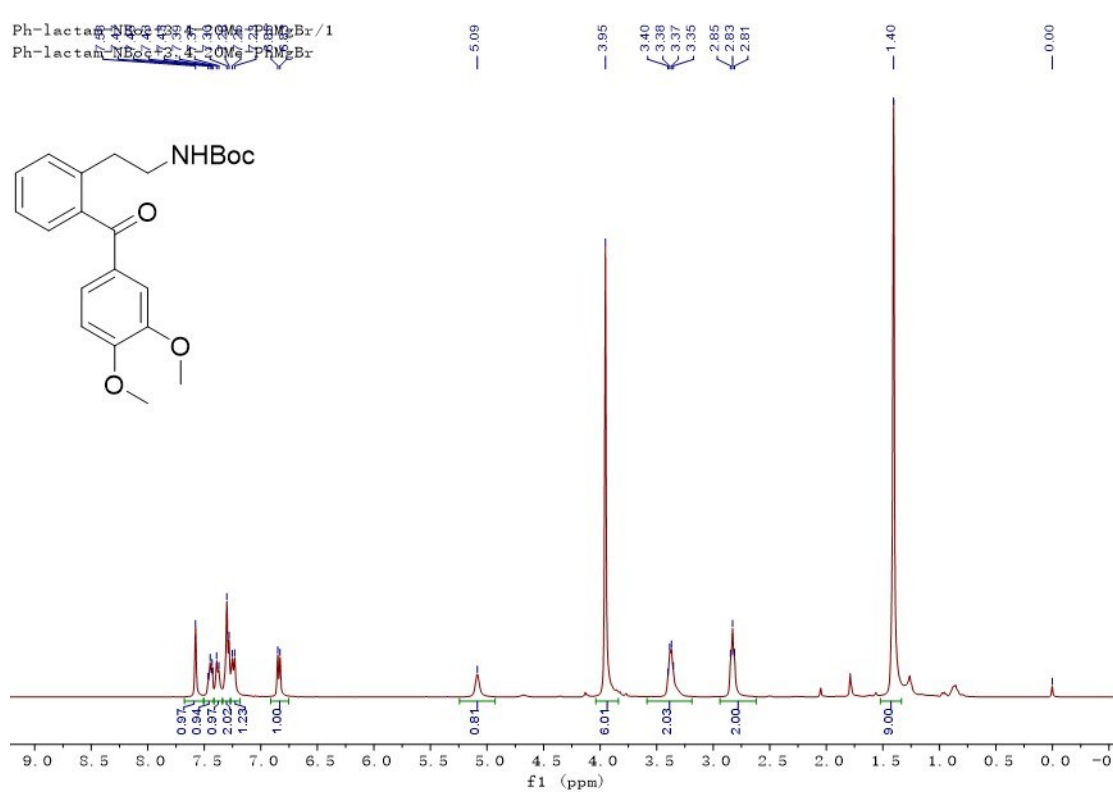

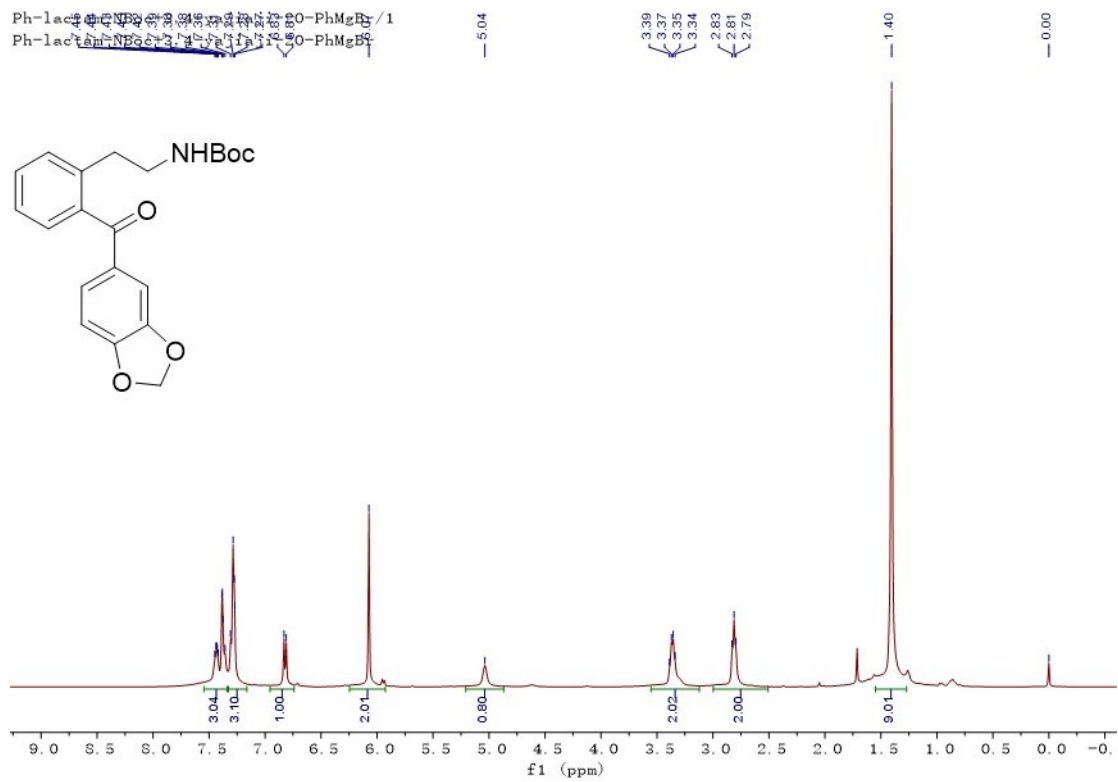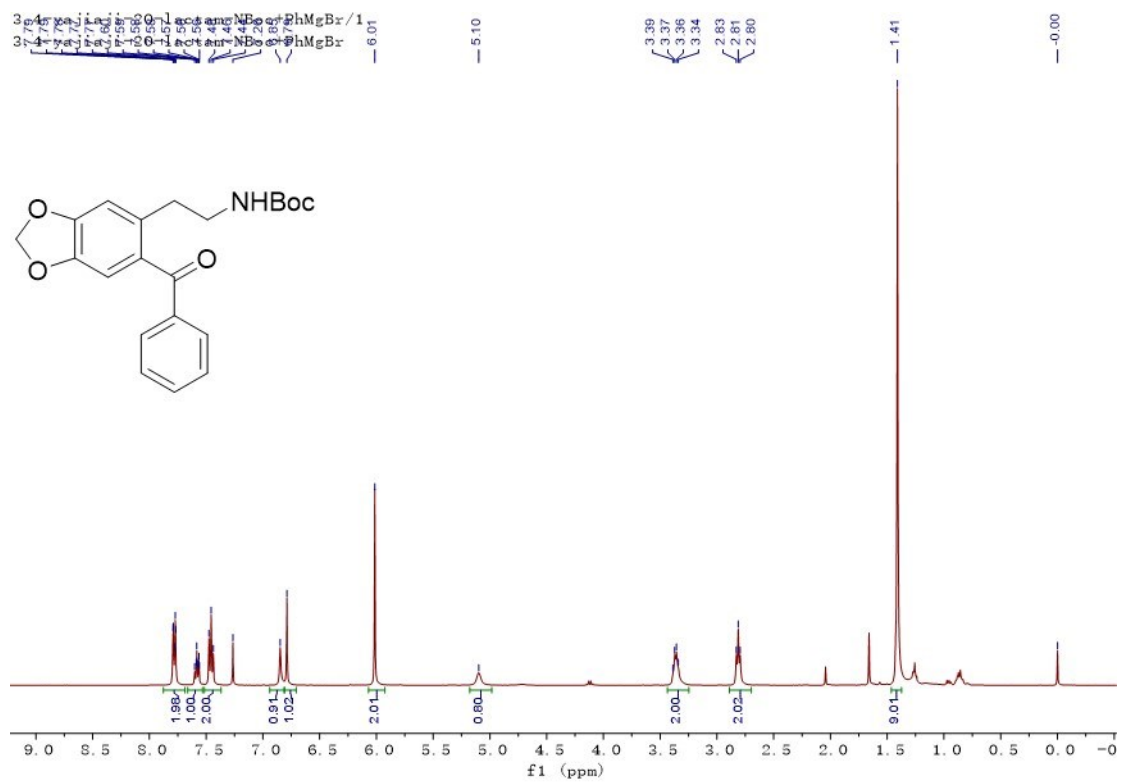

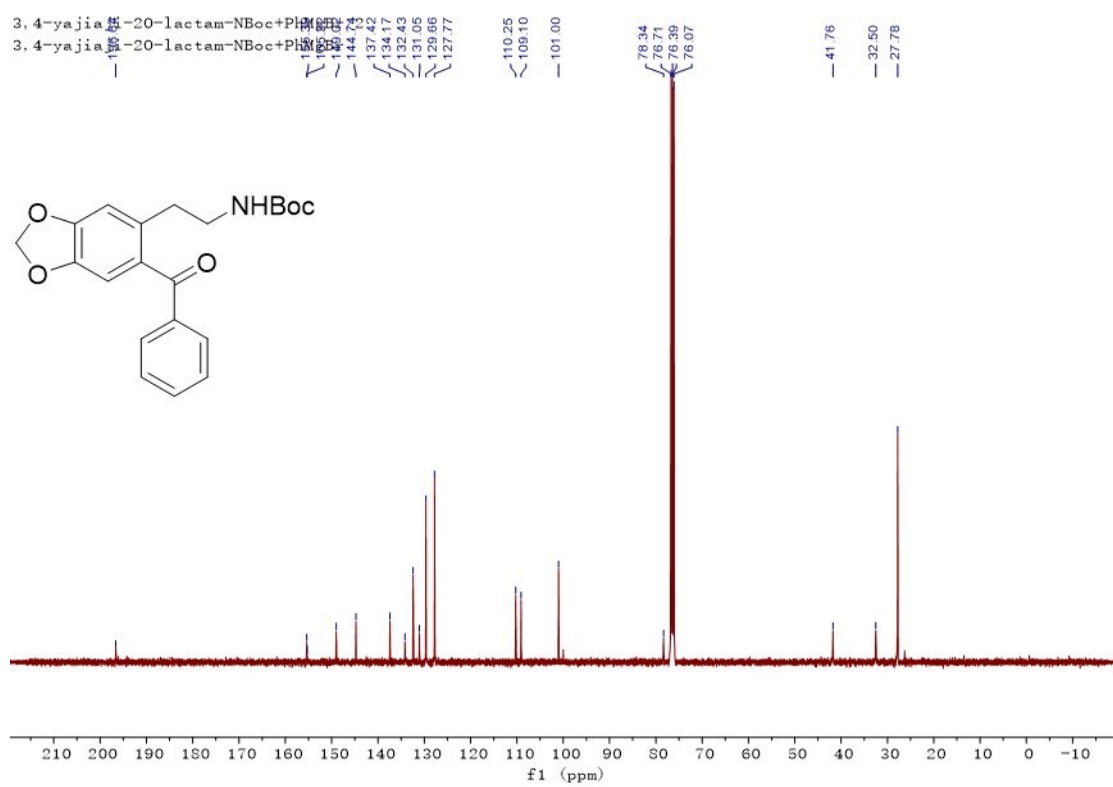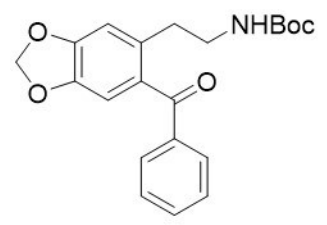

| Sample Name    | Position            | Instrument Name | User Name              |
|----------------|---------------------|-----------------|------------------------|
| 0.01           | p2C9                | Instrument 1    | G6520B-PC\Admin        |
| Inj Vol        | InjPosition         | SampleType      | IRM Calibration Status |
| 0.01           |                     | Sample          | Success                |
| Data Filename  | ACQ Method          | Comment         | Acquired Time          |
| LRX-0509-2-p.d | 20110418-MSonly-p.m |                 | 5/12/2020 3:36:25 PM   |

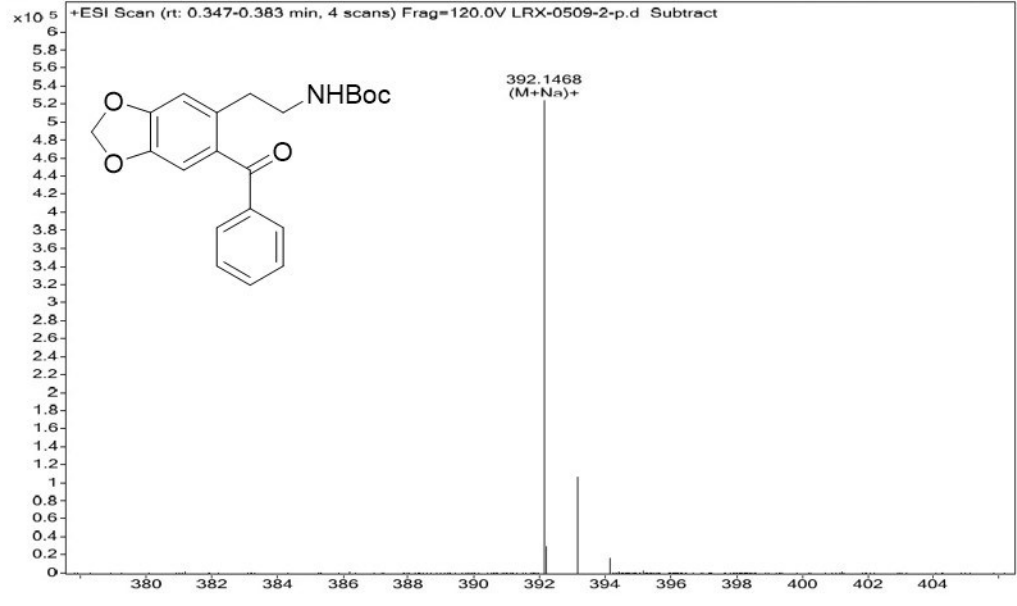

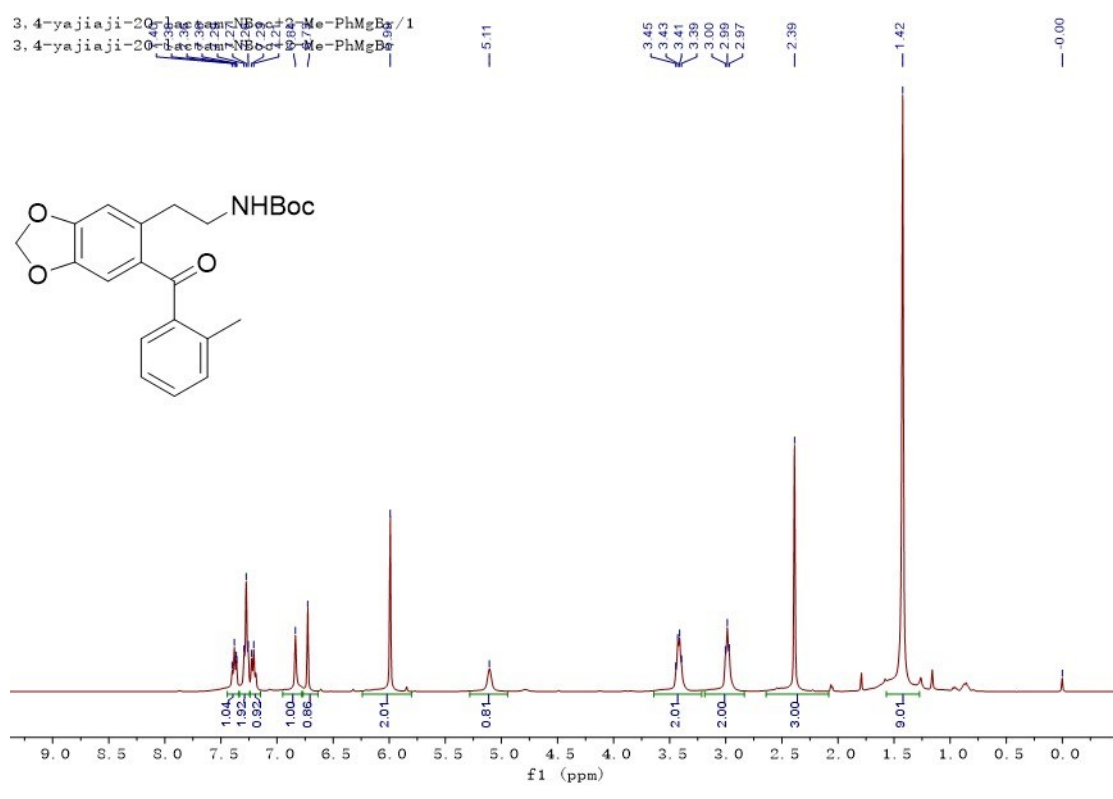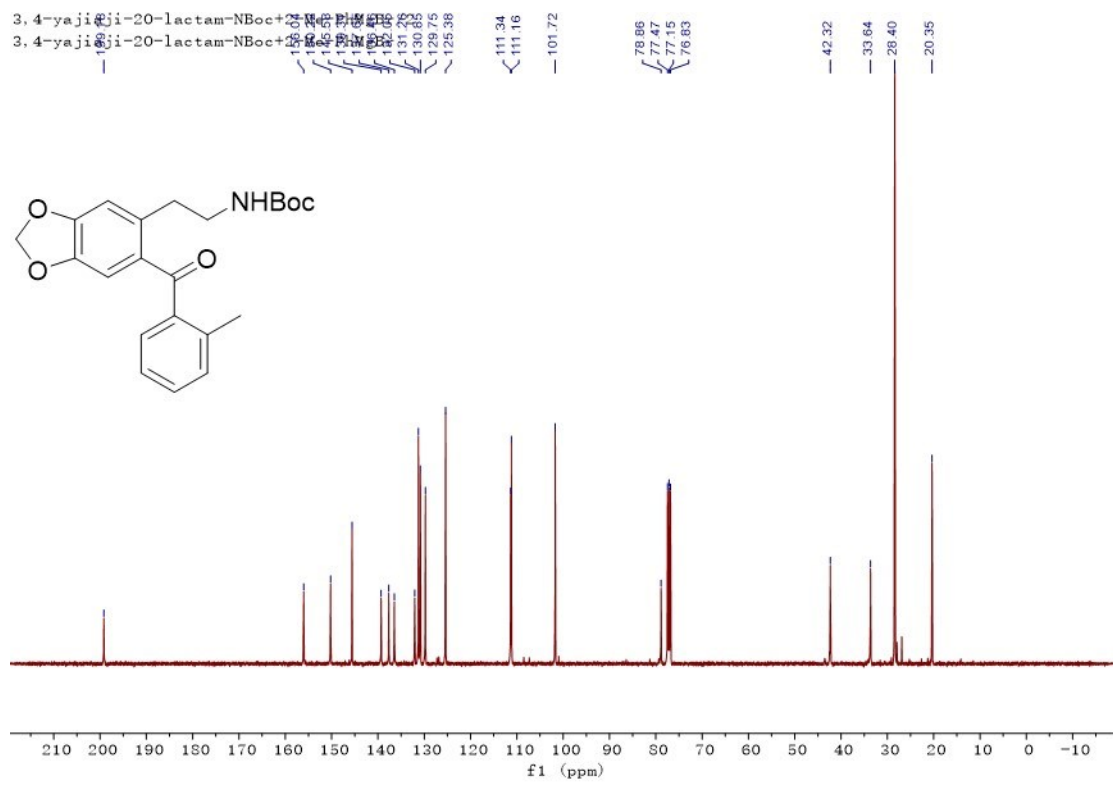

|               |                 |             |                     |                 |              |                        |                     |
|---------------|-----------------|-------------|---------------------|-----------------|--------------|------------------------|---------------------|
| Sample Name   | 0.01            | Position    | p283                | Instrument Name | Instrument 1 | User Name              | G65208-PC\Admin     |
| Inj Vol       | 0.01            | InjPosition |                     | SampleType      | Sample       | IRM Calibration Status | Success             |
| Data Filename | LRX-0628-12-p.d | ACQ Method  | 20110418-M5only-p.m | Comment         |              | Acquired Time          | 7/8/2020 2:02:08 PM |

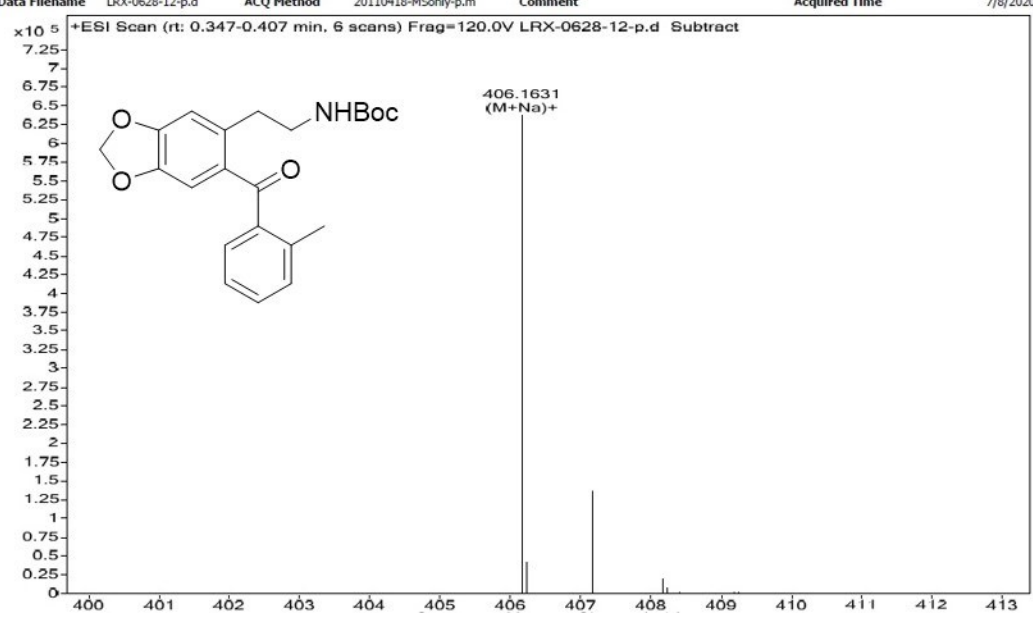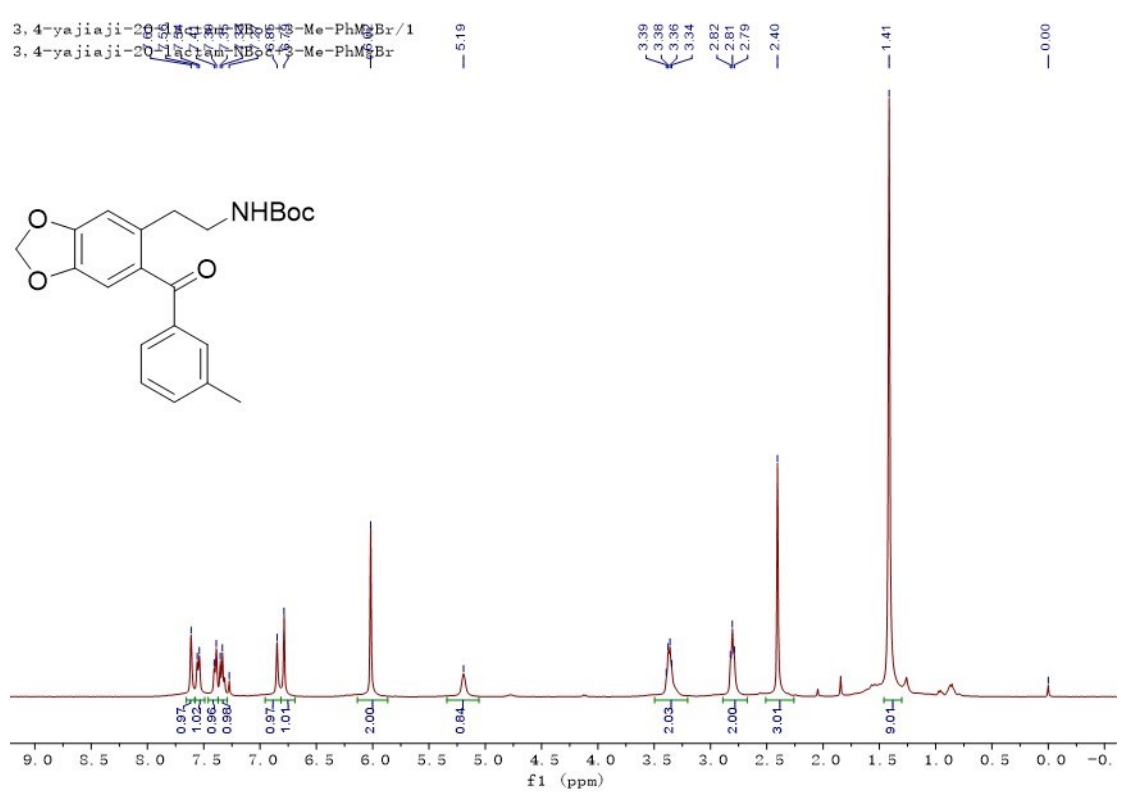

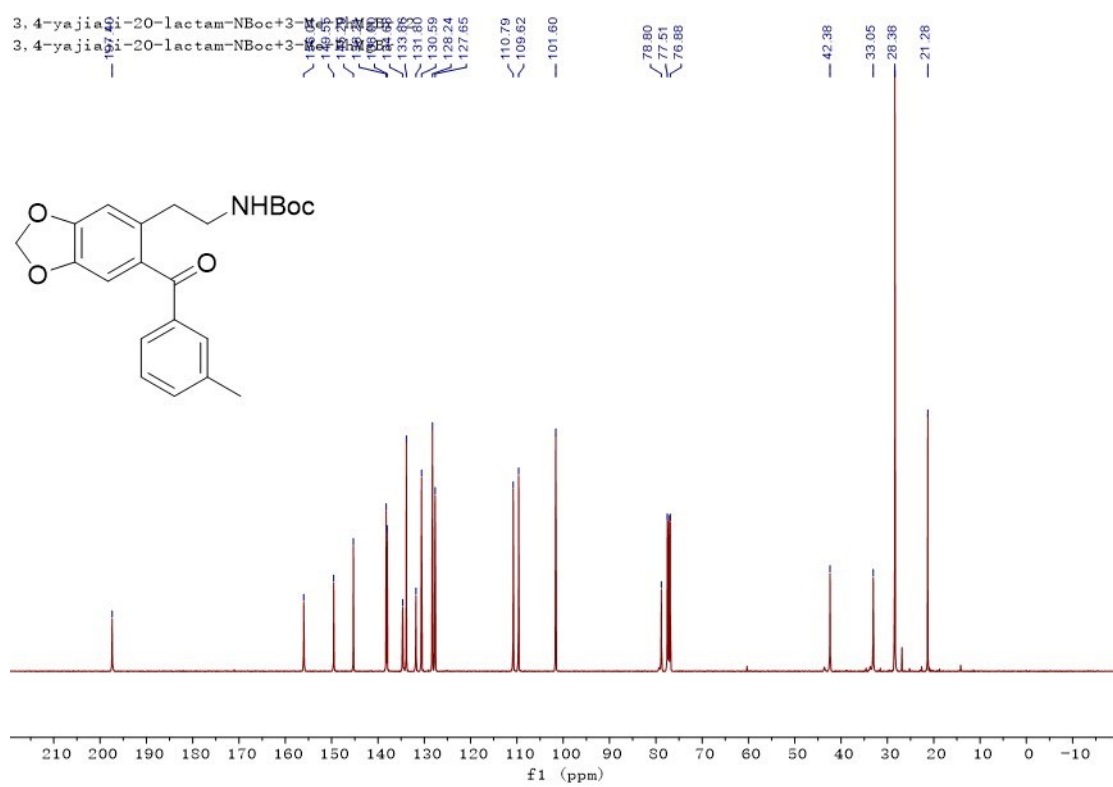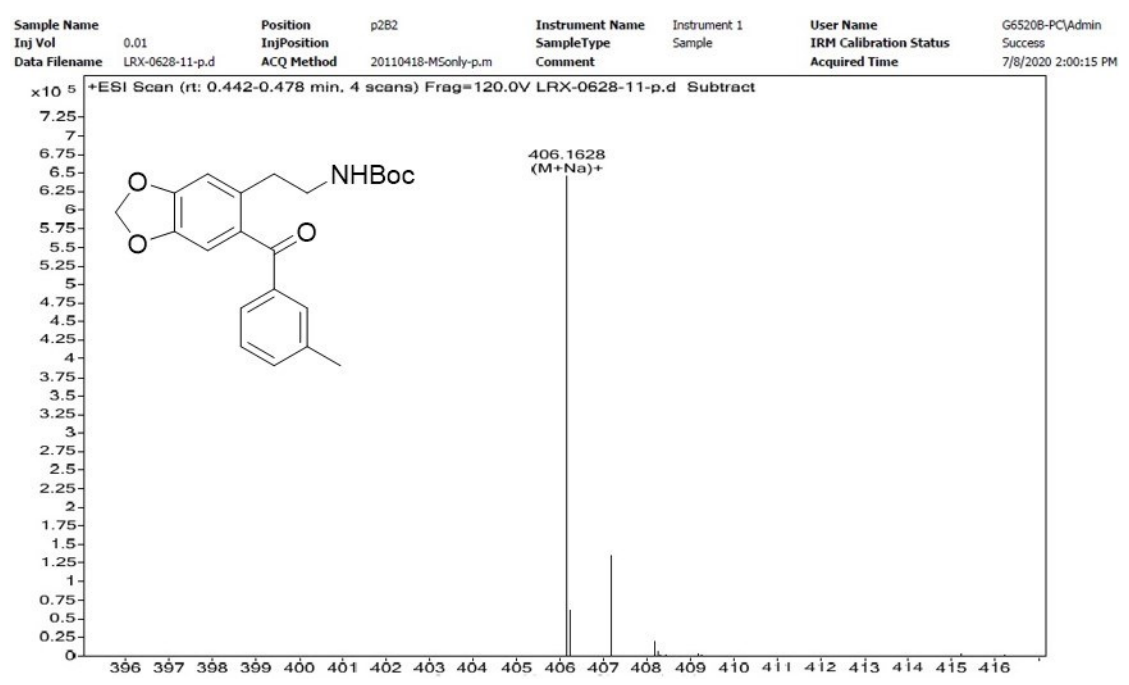



|               |             |                     |                 |              |                        |                     |
|---------------|-------------|---------------------|-----------------|--------------|------------------------|---------------------|
| Sample Name   | Position    | p2B5                | Instrument Name | Instrument 1 | User Name              | G65208-PC\Admin     |
| Inj Vol       | InjPosition |                     | SampleType      | Sample       | IRM Calibration Status | Success             |
| Data Filename | ACQ Method  | 20110418-M5only-p.m | Comment         |              | Acquired Time          | 7/8/2020 2:06:07 PM |

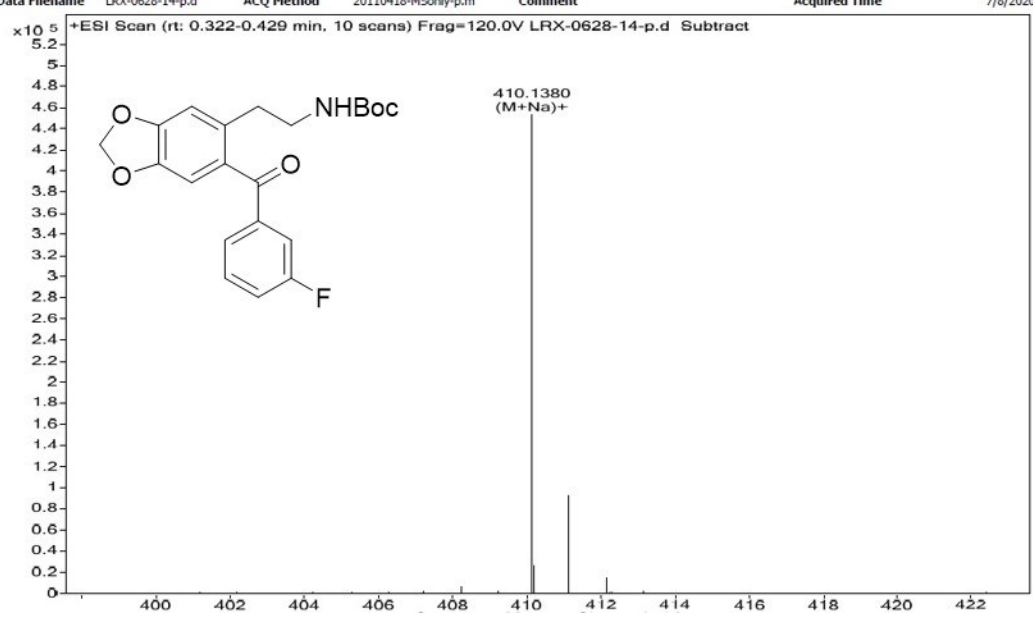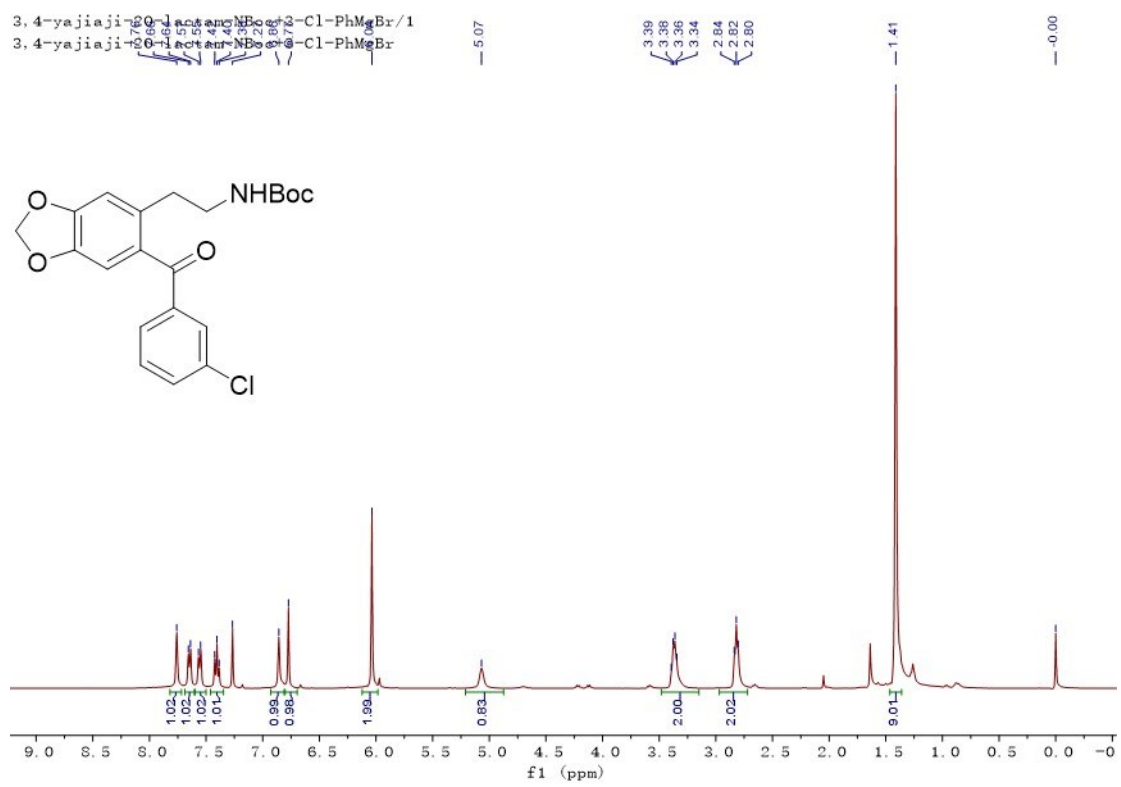



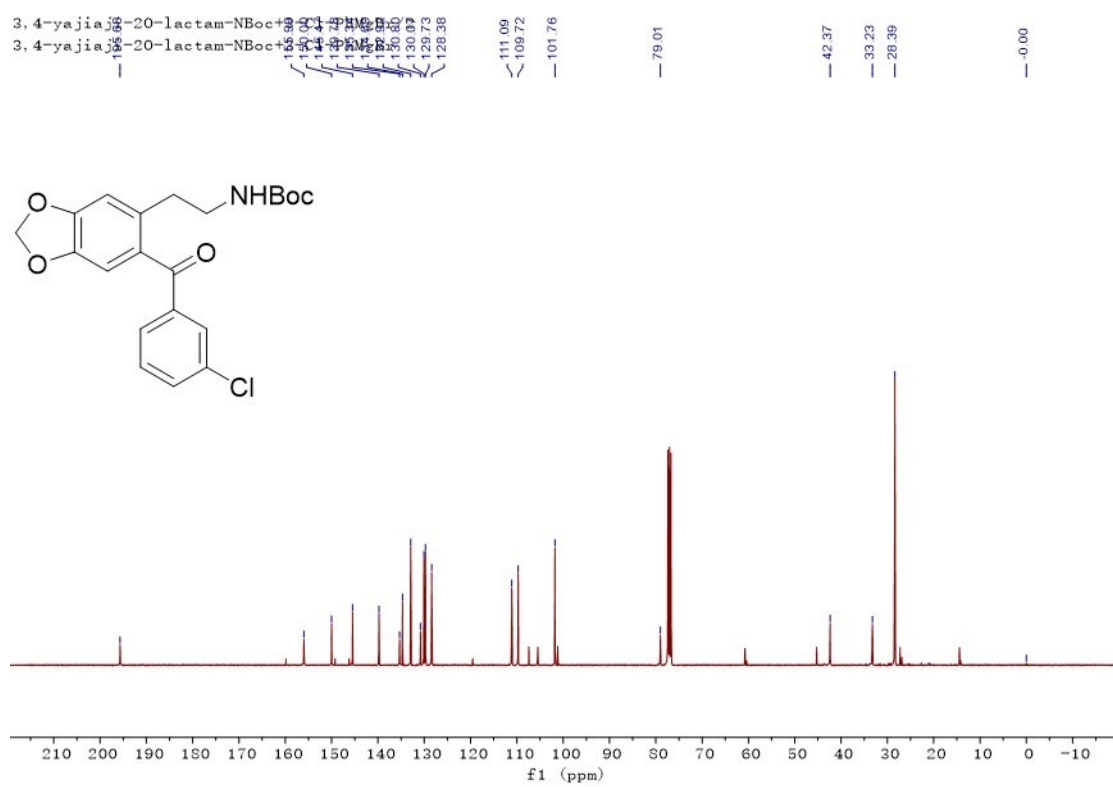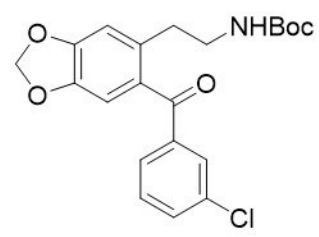

| Sample Name     | Position        | Instrument Name | User Name           |
|-----------------|-----------------|-----------------|---------------------|
| LRX-0628-16-p.d | p287            | Instrument 1    | G65208-PC\Admin     |
| Inj Vol         | 0.01            | Sample          | Success             |
| Data Filename   | LRX-0628-16-p.d | Comment         | 7/8/2020 2:09:55 PM |

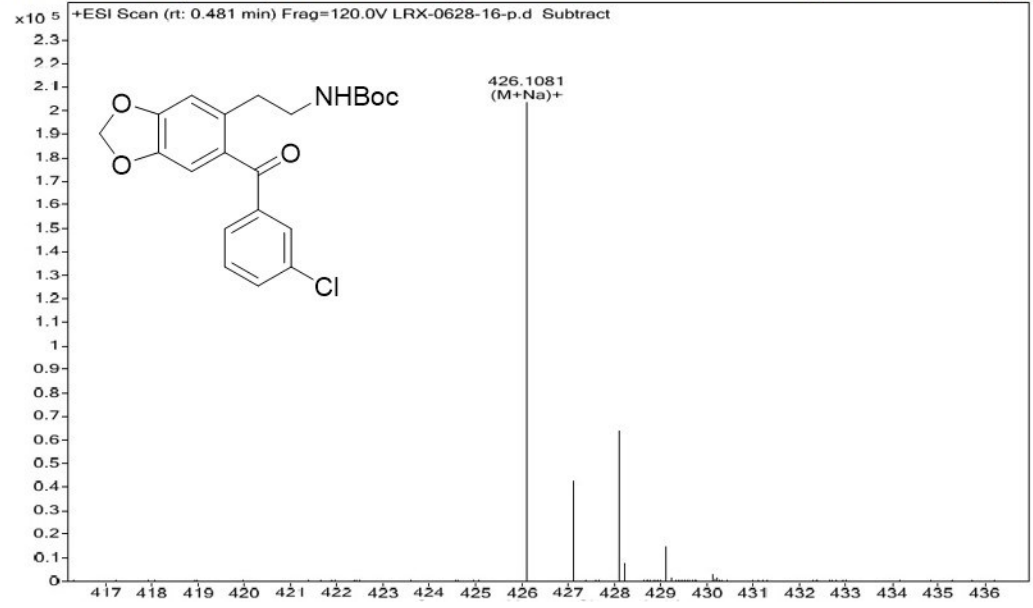

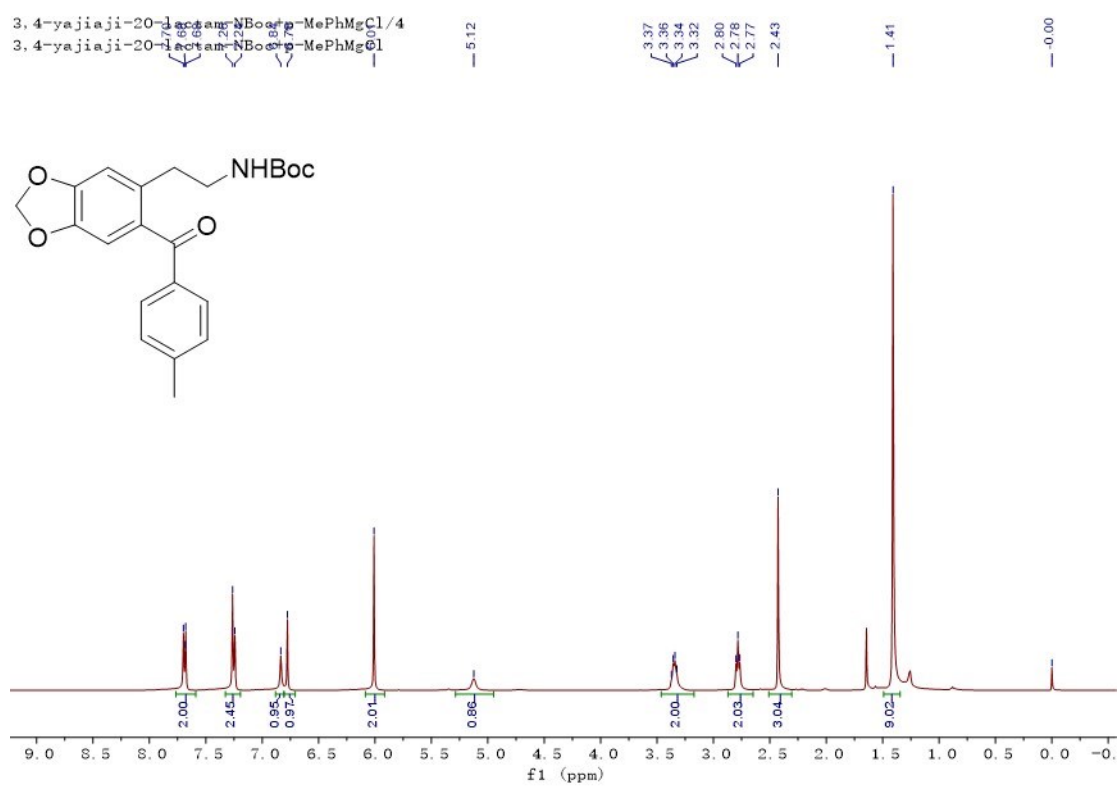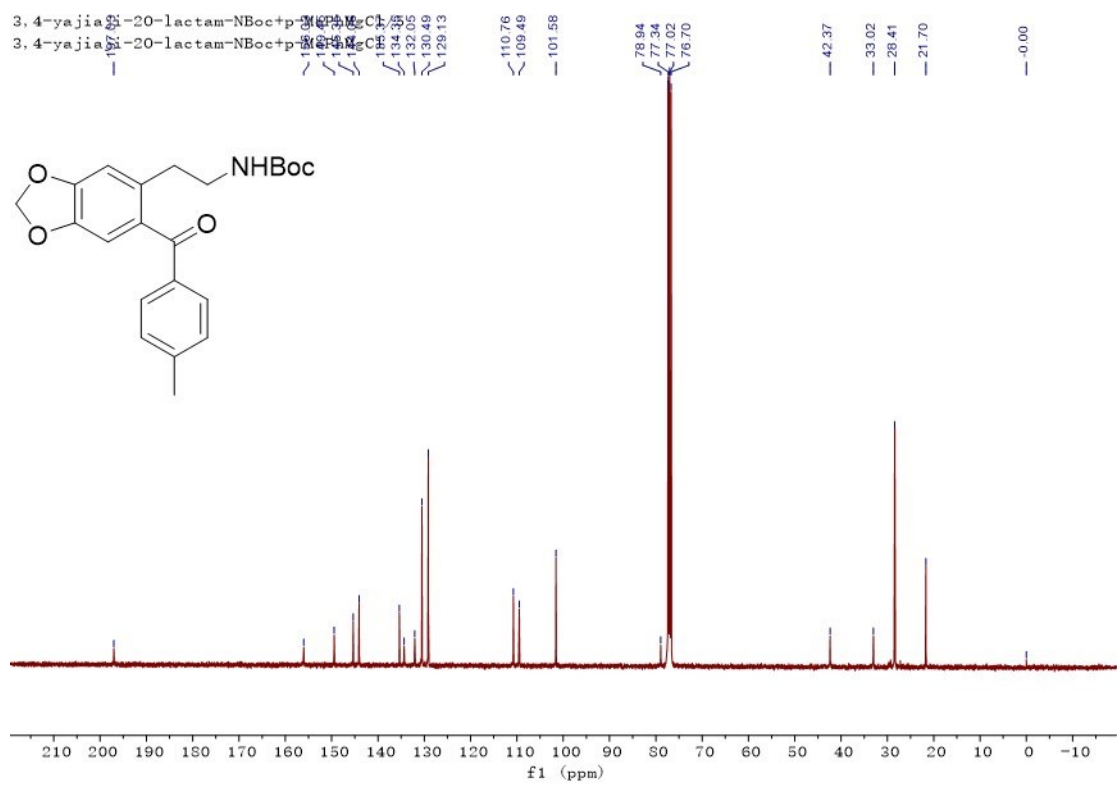

| Sample Name   | Position       | Instrument Name    | Instrument 1 | User Name              | G6520B-PC\Admin      |
|---------------|----------------|--------------------|--------------|------------------------|----------------------|
| Inj Vol       | 0.01           | p2D2               | Sample       | IRM Calibration Status | Success              |
| Data Filename | LRX-0509-4-p.d | 20110418-MOnly-p.m | Comment      | Acquired Time          | 5/12/2020 3:40:49 PM |

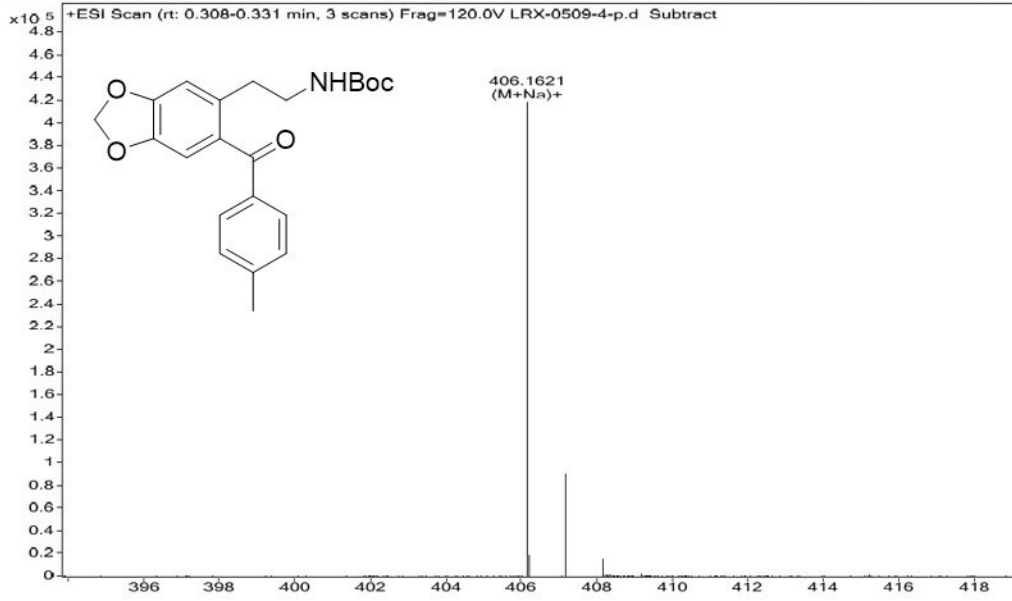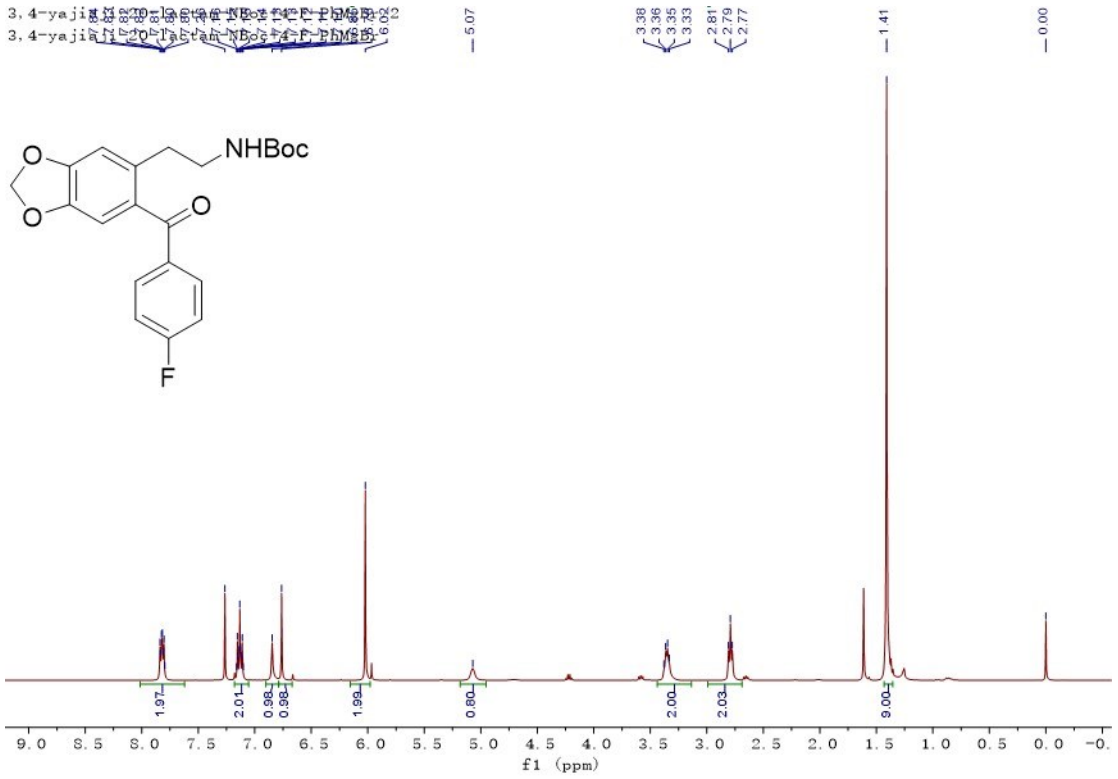

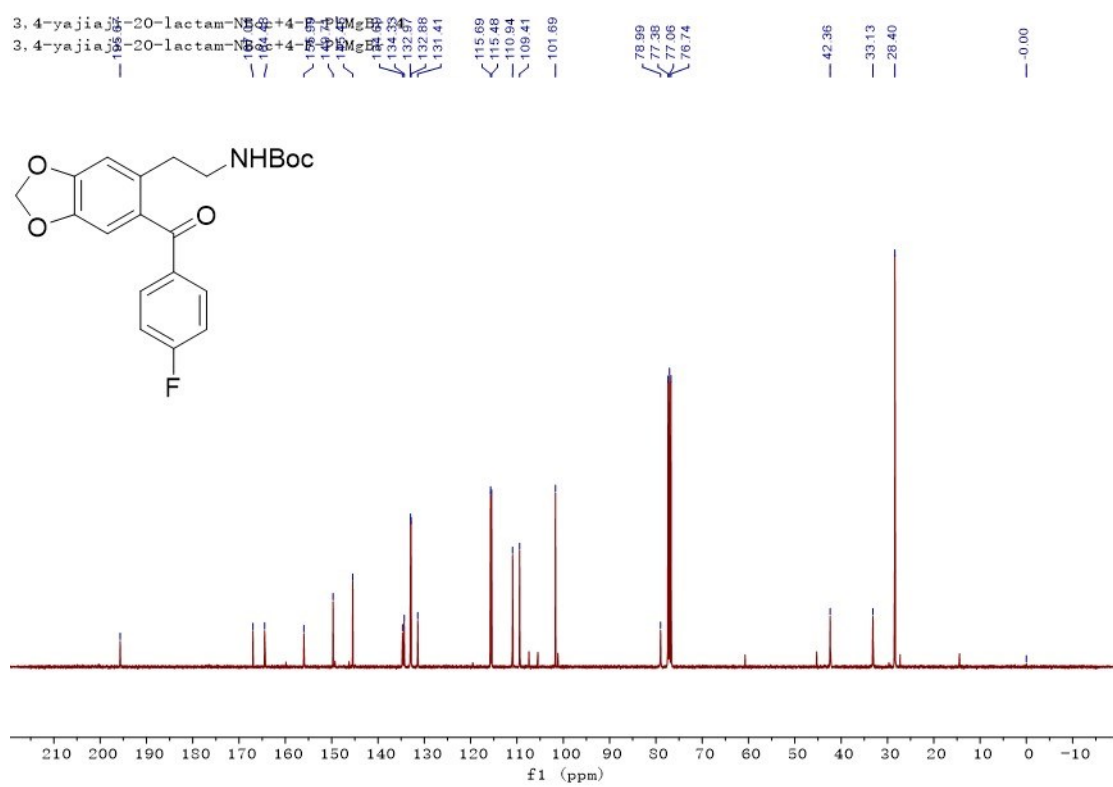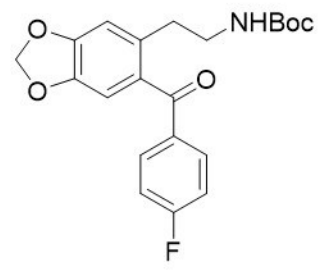

|               |                 |             |                     |                 |              |                        |                     |
|---------------|-----------------|-------------|---------------------|-----------------|--------------|------------------------|---------------------|
| Sample Name   | 0.01            | Position    | p2B4                | Instrument Name | Instrument 1 | User Name              | G65208-PC\Admin     |
| Inj Vol       |                 | InjPosition |                     | SampleType      | Sample       | IRM Calibration Status | Success             |
| Data Filename | LRX-0628-13-p.d | ACQ Method  | 20110418-MSonly-p.m | Comment         |              | Acquired Time          | 7/8/2020 2:04:14 PM |

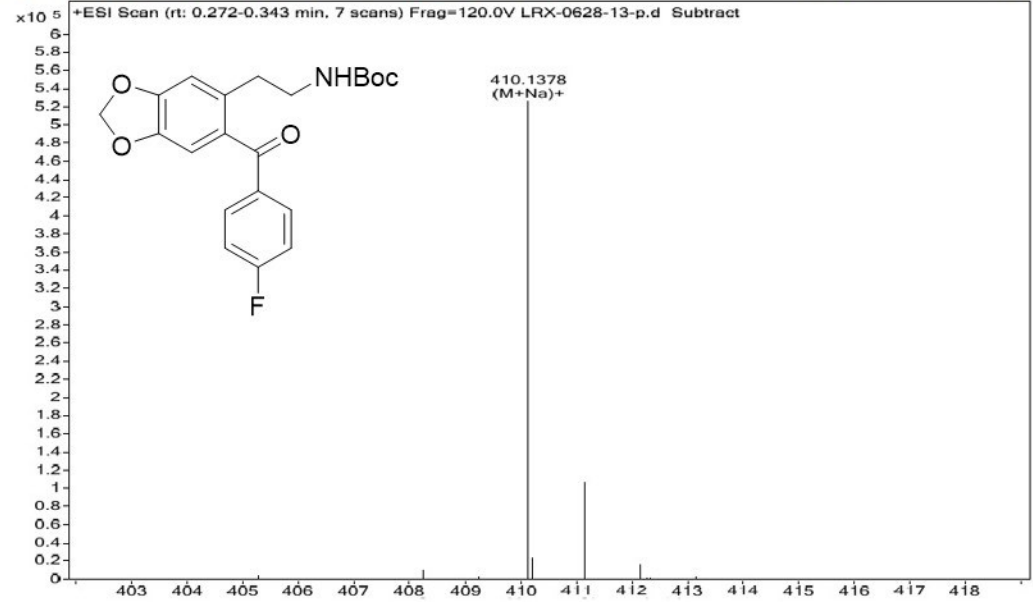

3,4-yajiaji-20-lactam-NBoc+4-Cl-PhMeBr/1  
 3,4-yajiaji-20-lactam-NBoc+4-Cl-PhMeBr

5.08 3.39 3.37 3.35 3.34 2.82 2.80 2.78 1.41 0.00

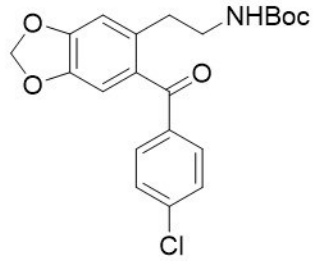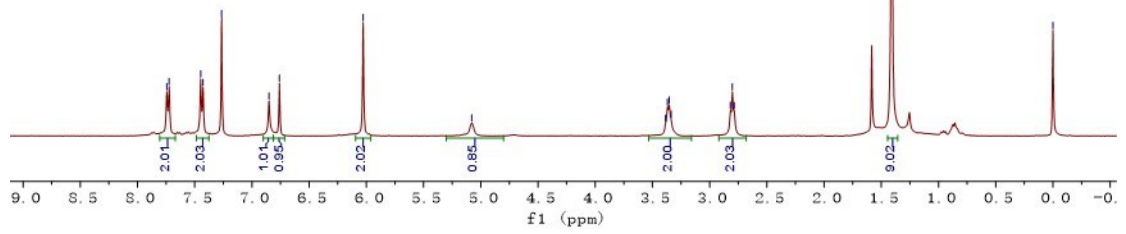

3,4-yajiaji-20-lactam-NBoc+4-Cl-PhMeBr/1  
 3,4-yajiaji-20-lactam-NBoc+4-Cl-PhMeBr

198.33 164.47 151.86 144.84 144.77 131.13 128.76 111.02 109.54 101.73 79.02 77.38 77.04 76.72 42.37 33.17 28.40 0.00

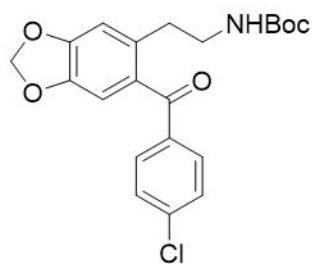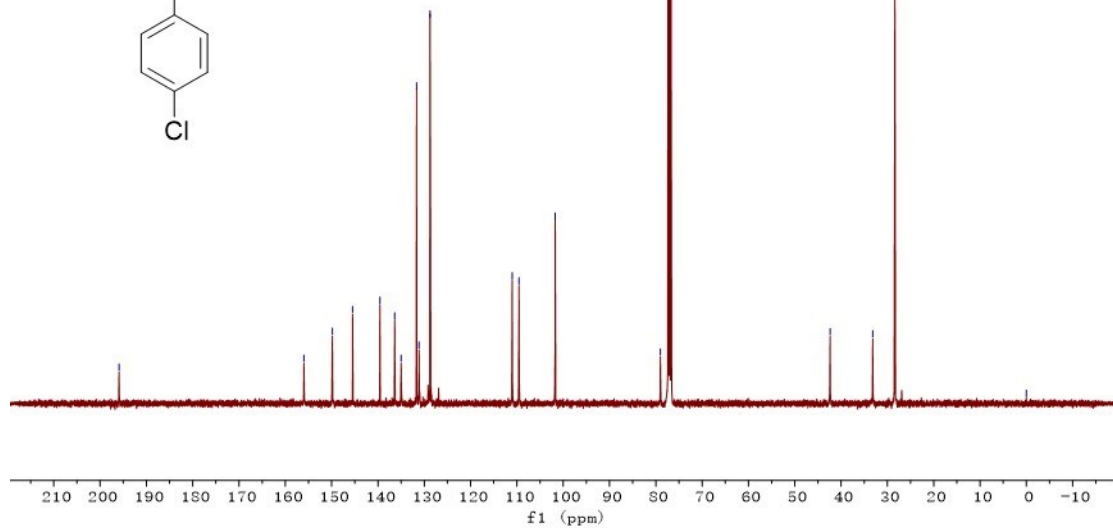

|               |             |                     |                 |              |                        |                     |
|---------------|-------------|---------------------|-----------------|--------------|------------------------|---------------------|
| Sample Name   | Position    | p2B6                | Instrument Name | Instrument 1 | User Name              | G6520B-PC\Admin     |
| Inj Vol       | InjPosition |                     | SampleType      | Sample       | IRM Calibration Status | Success             |
| Data Filename | ACQ Method  | 20110418-M5only-p.m | Comment         |              | Acquired Time          | 7/8/2020 2:08:03 PM |

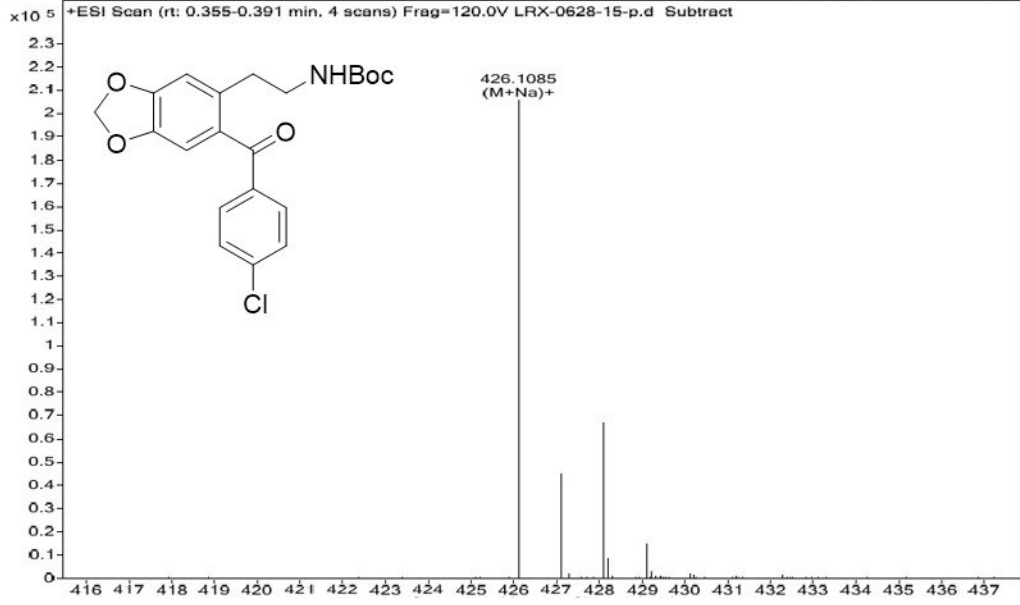

3,4-yajiaji-20201008-181818-3,4-2OMe-PhMgBr  
 3,4-yajiaji-20201008-181818-3,4-2OMe-PhMgBr

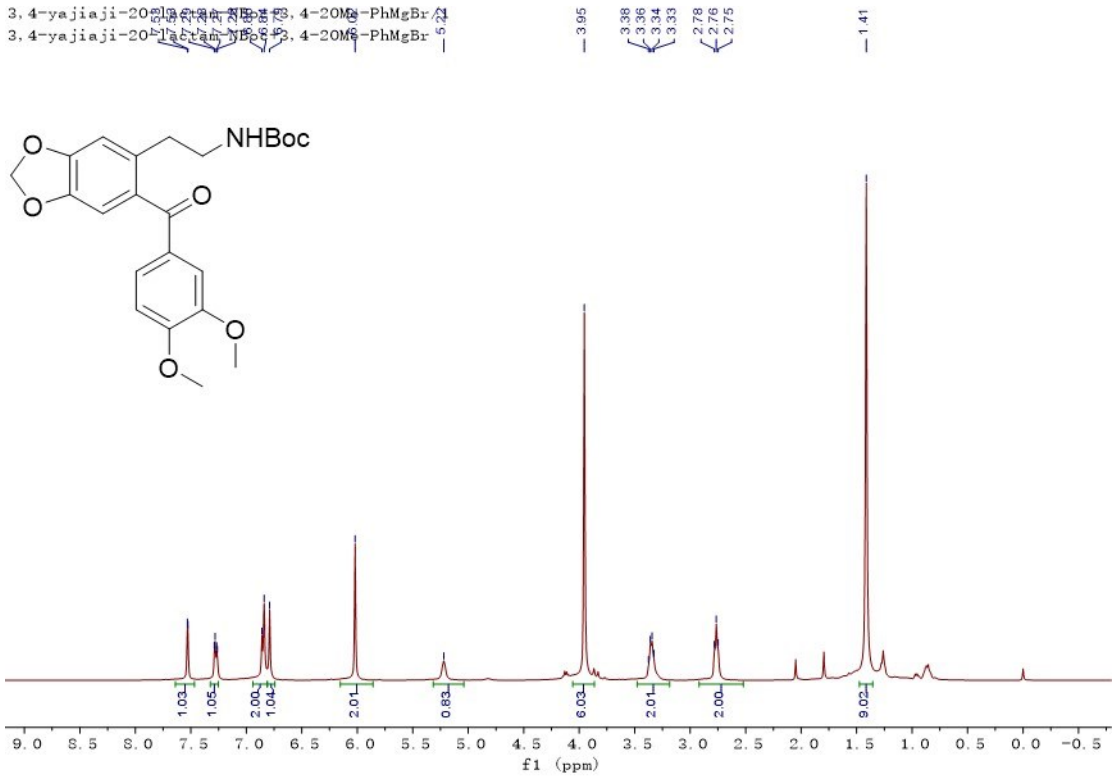

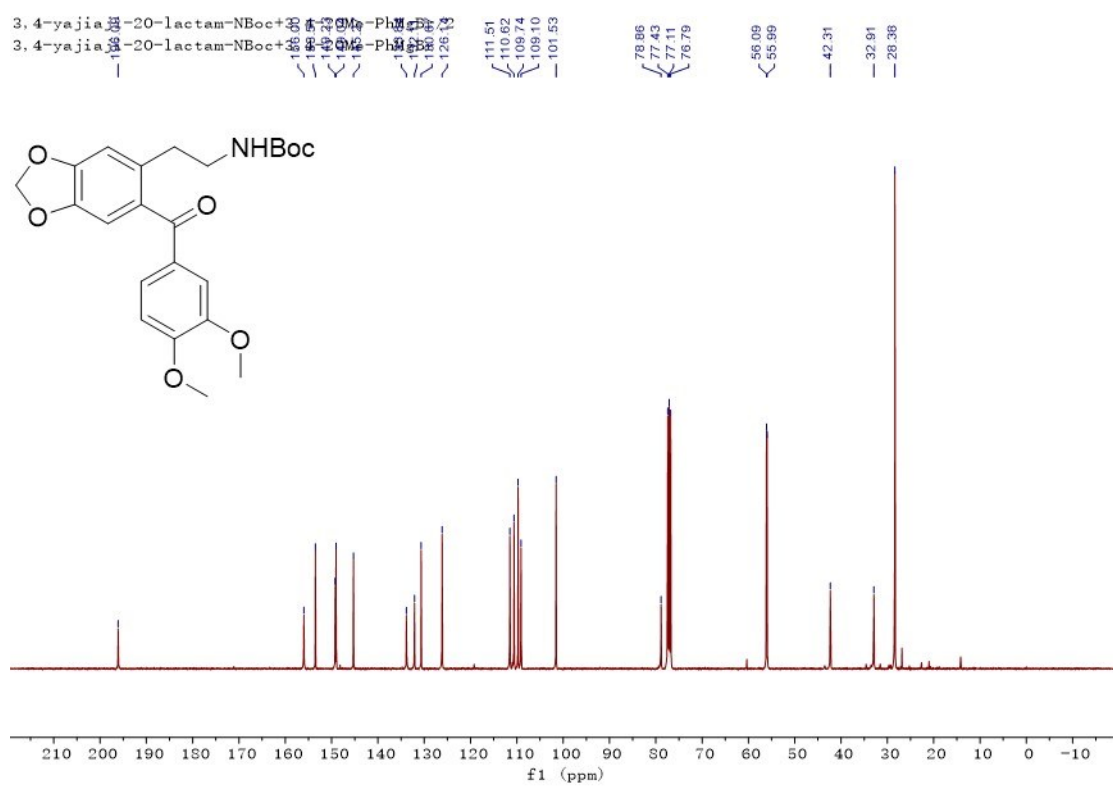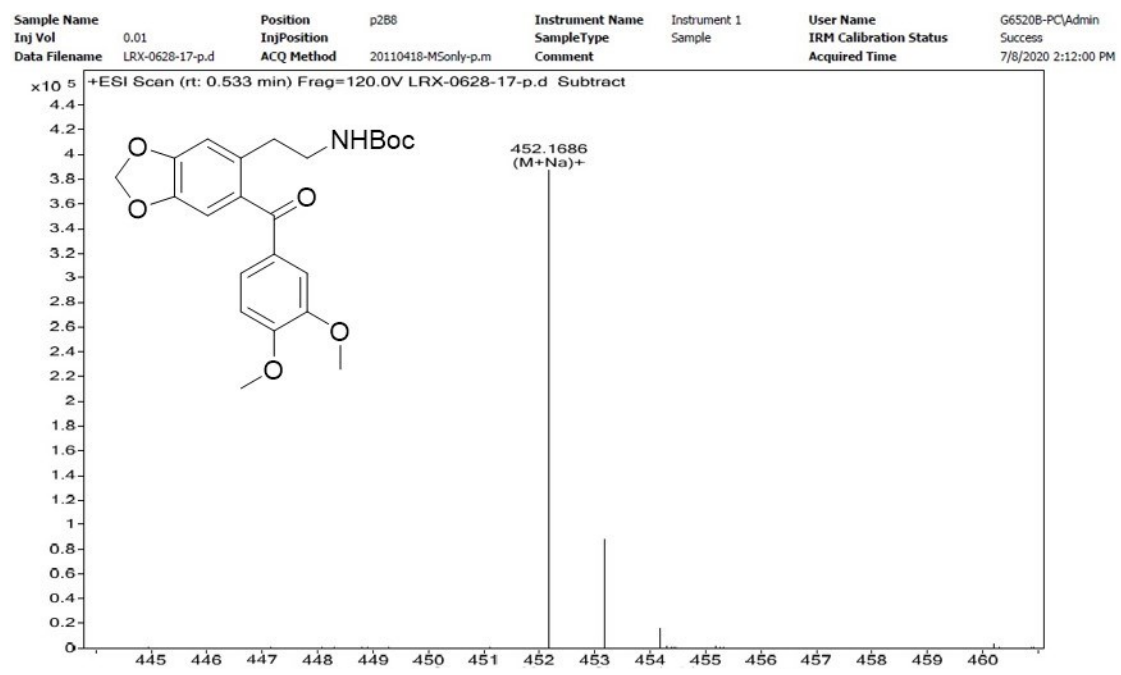





|               |             |                     |                 |              |                        |                     |
|---------------|-------------|---------------------|-----------------|--------------|------------------------|---------------------|
| Sample Name   | Position    | p2B9                | Instrument Name | Instrument 1 | User Name              | G6520B-PC\Admin     |
| Inj Vol       | InjPosition |                     | SampleType      | Sample       | IRM Calibration Status | Success             |
| Data Filename | ACQ Method  | 20110418-M5only-p.m | Comment         |              | Acquired Time          | 7/8/2020 2:14:16 PM |

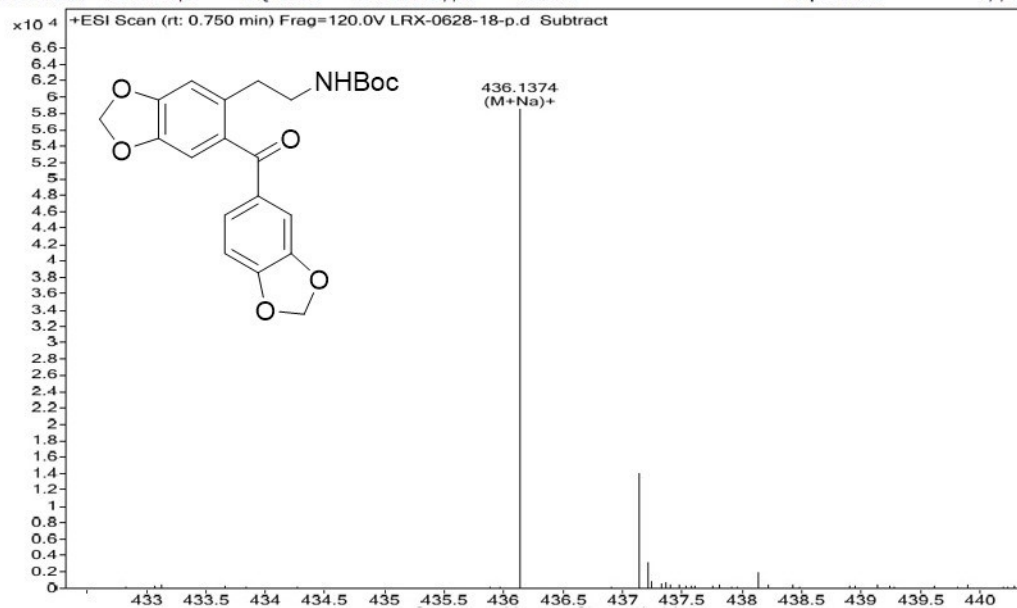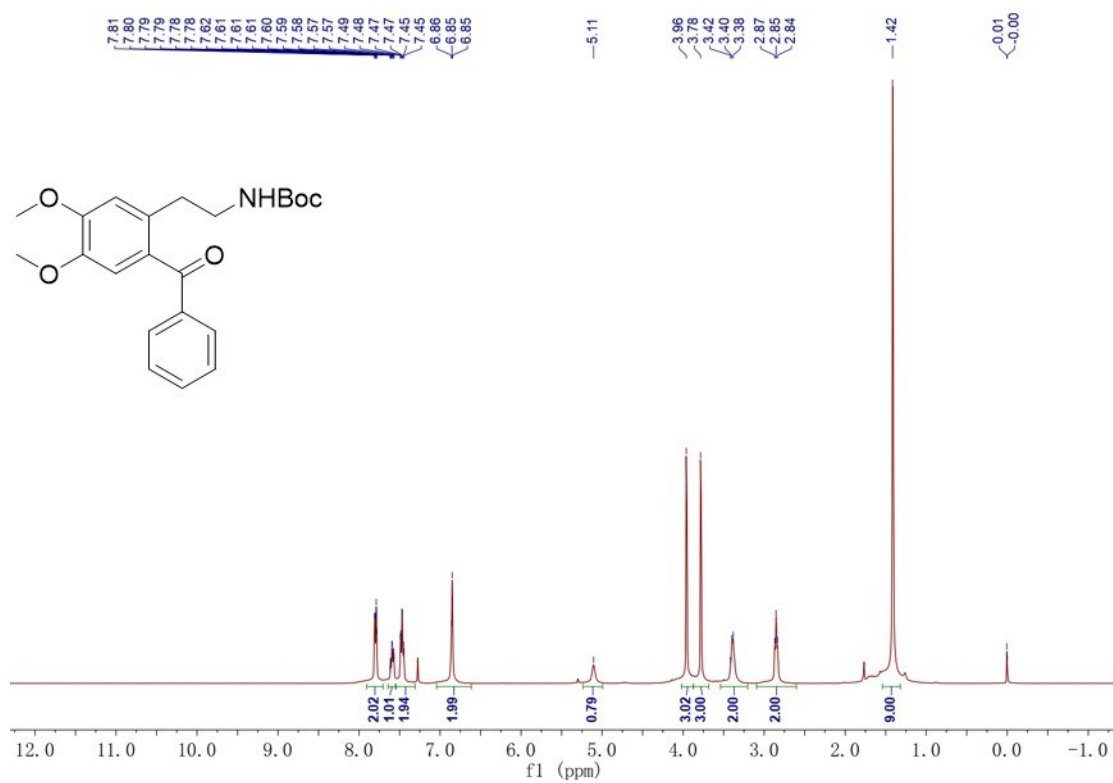

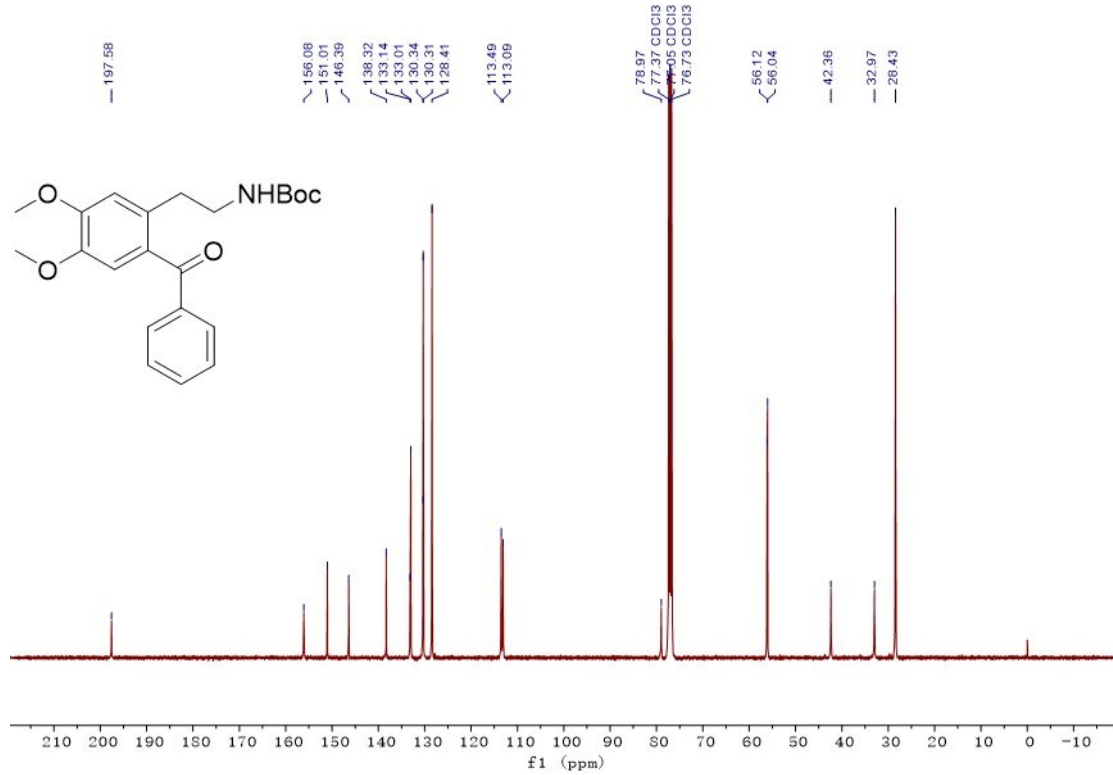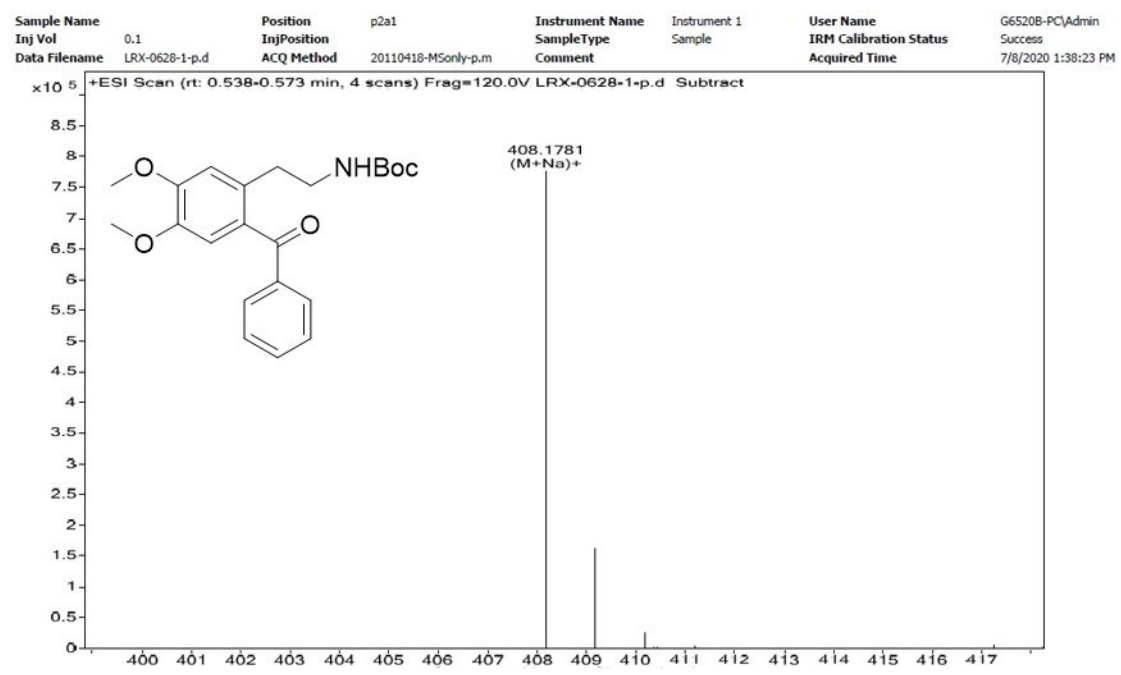

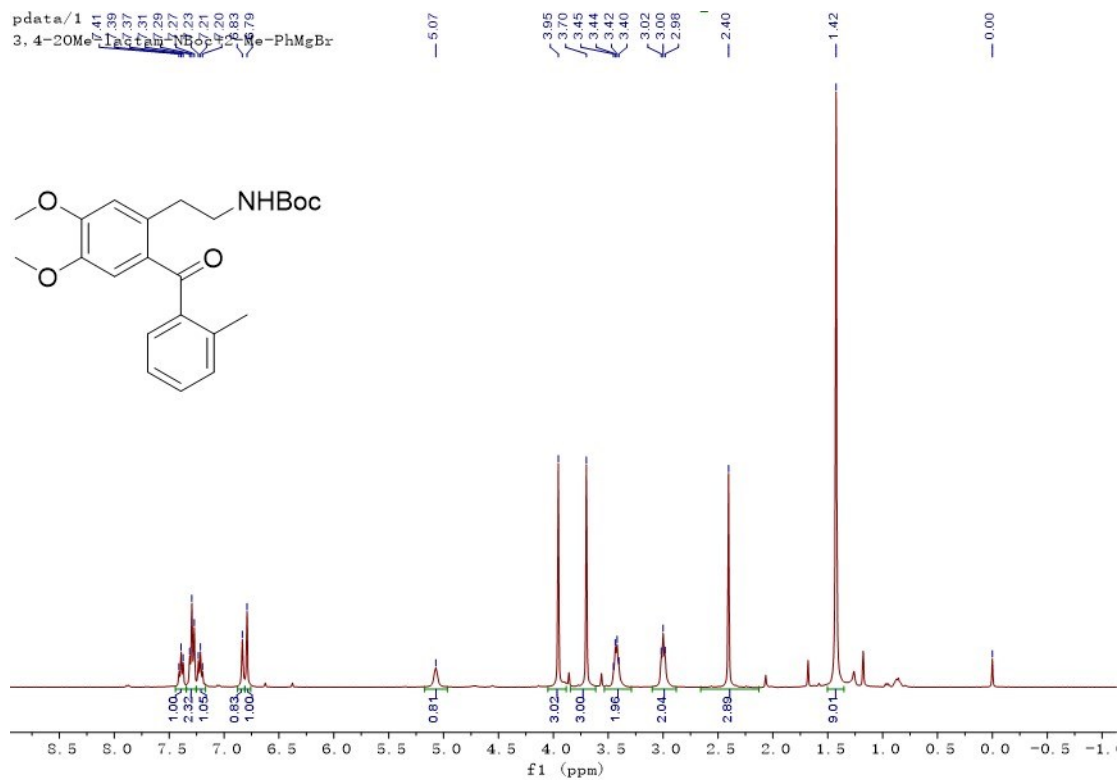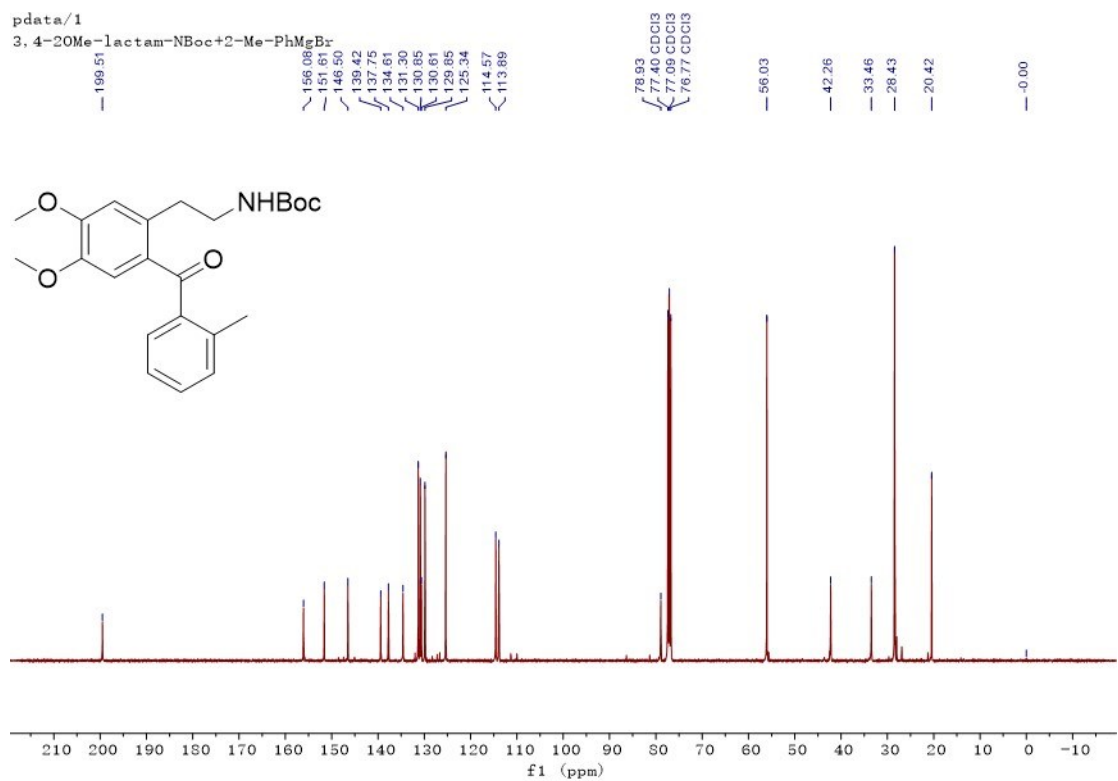

|               |                |             |                     |                 |              |                        |                     |
|---------------|----------------|-------------|---------------------|-----------------|--------------|------------------------|---------------------|
| Sample Name   | 0.02           | Position    | p2a3                | Instrument Name | Instrument 1 | User Name              | G6520B-PC\Admin     |
| Inj Vol       | 0.02           | InjPosition |                     | SampleType      | Sample       | IRM Calibration Status | Success             |
| Data Filename | LRX-0628-3-p.d | ACQ Method  | 20110418-M5only-p.m | Comment         |              | Acquired Time          | 7/8/2020 1:43:06 PM |

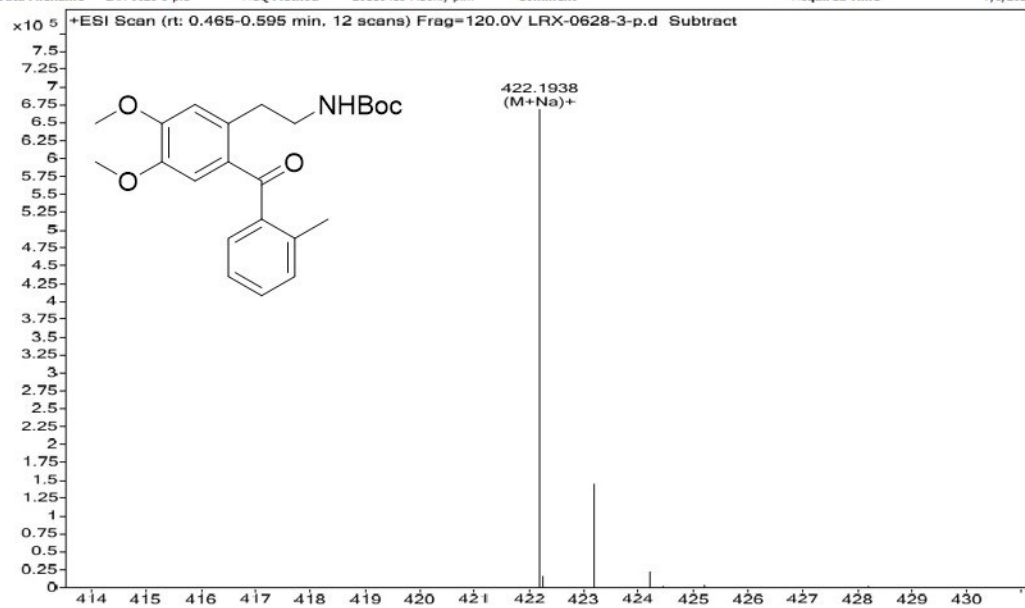

3.41 ppm (OMe), 3.37 ppm (OMe), 3.36 ppm (OMe), 3.34 ppm (OMe), 3.33 ppm (OMe), 3.28 ppm (OMe), 3.26 ppm (OMe), 3.25 ppm (OMe), 3.19 ppm (NH), 3.17 ppm (NH), 3.06 ppm (Me), 3.03 ppm (Me), 3.00 ppm (Me), 2.86 ppm (Me), 2.84 ppm (Me), 2.83 ppm (Me), 2.41 ppm (Me), 1.42 ppm (Me), 0.00 ppm (TMS)

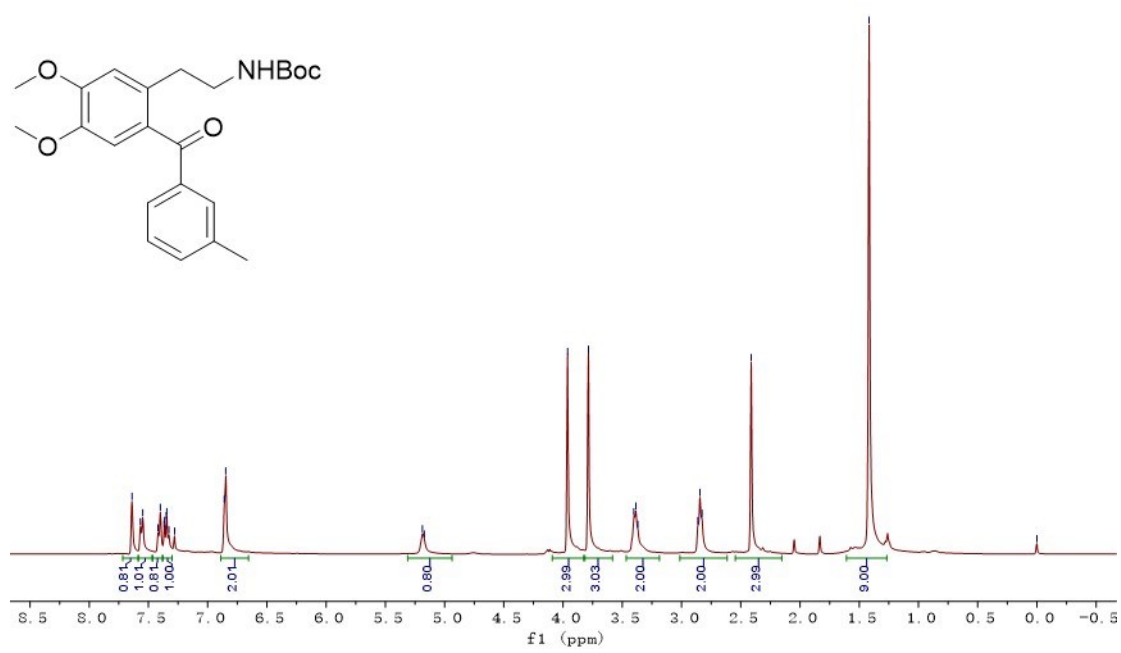

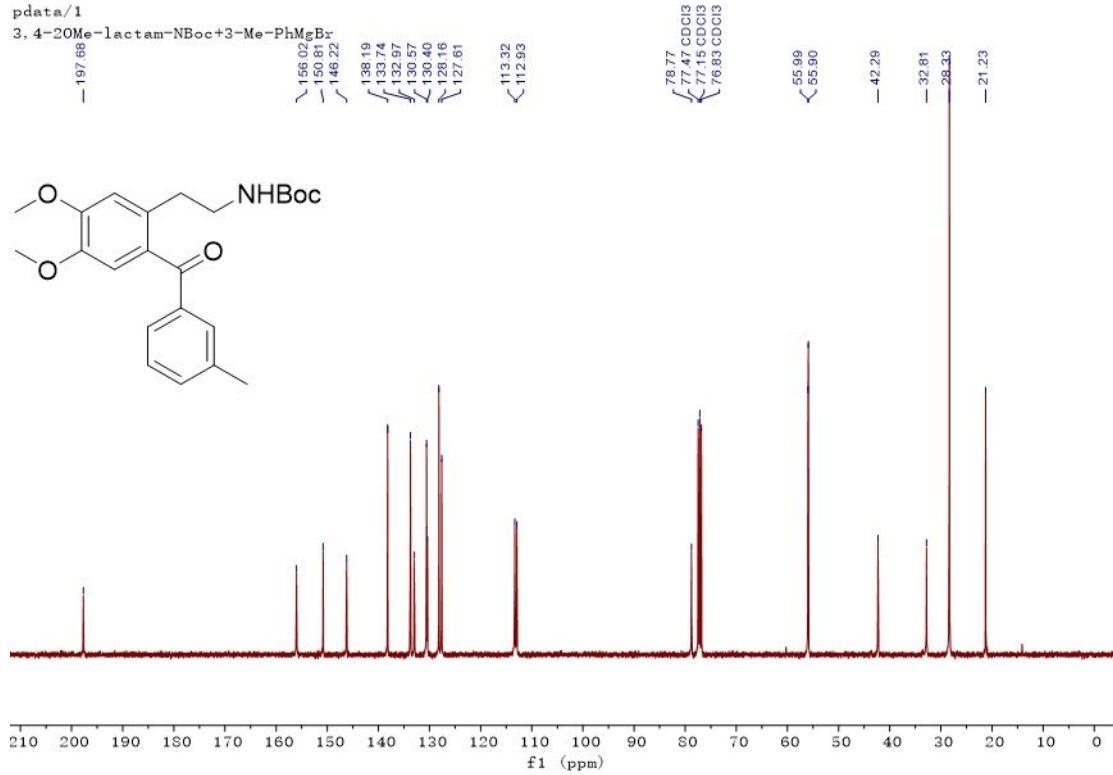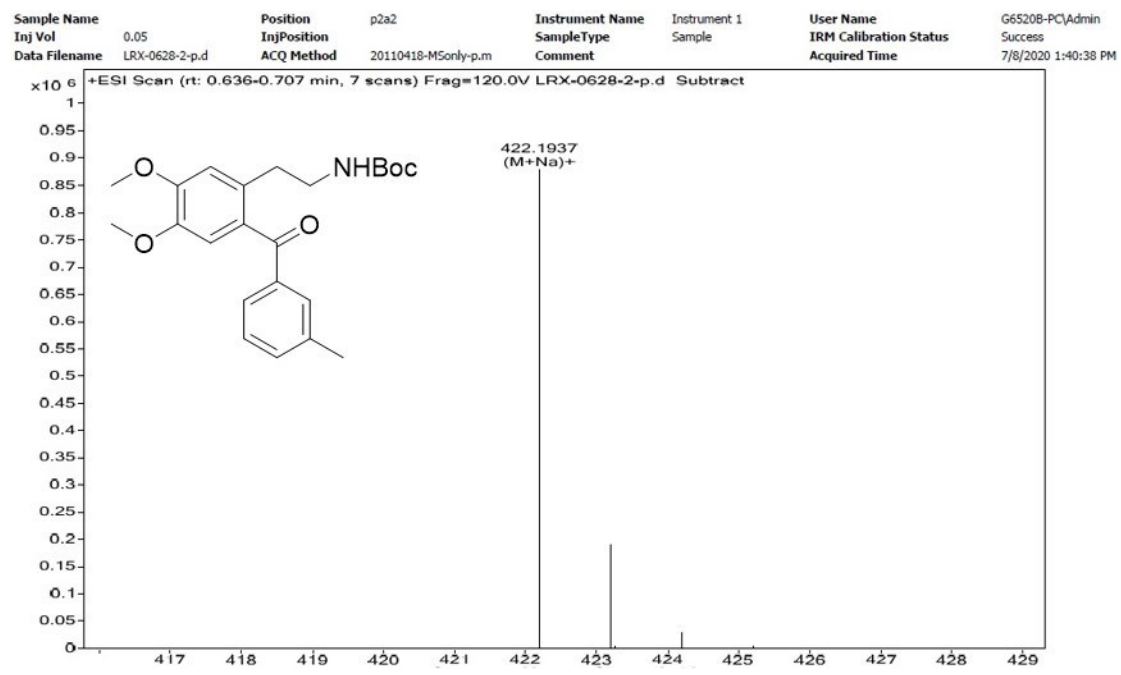

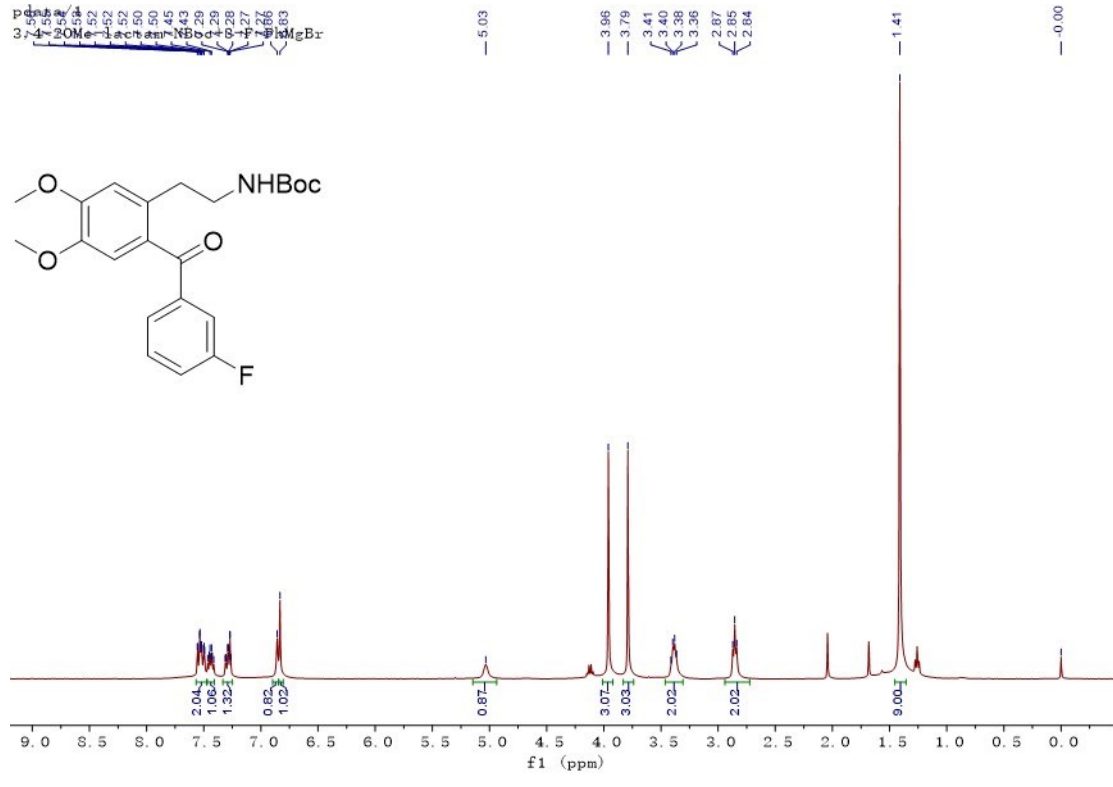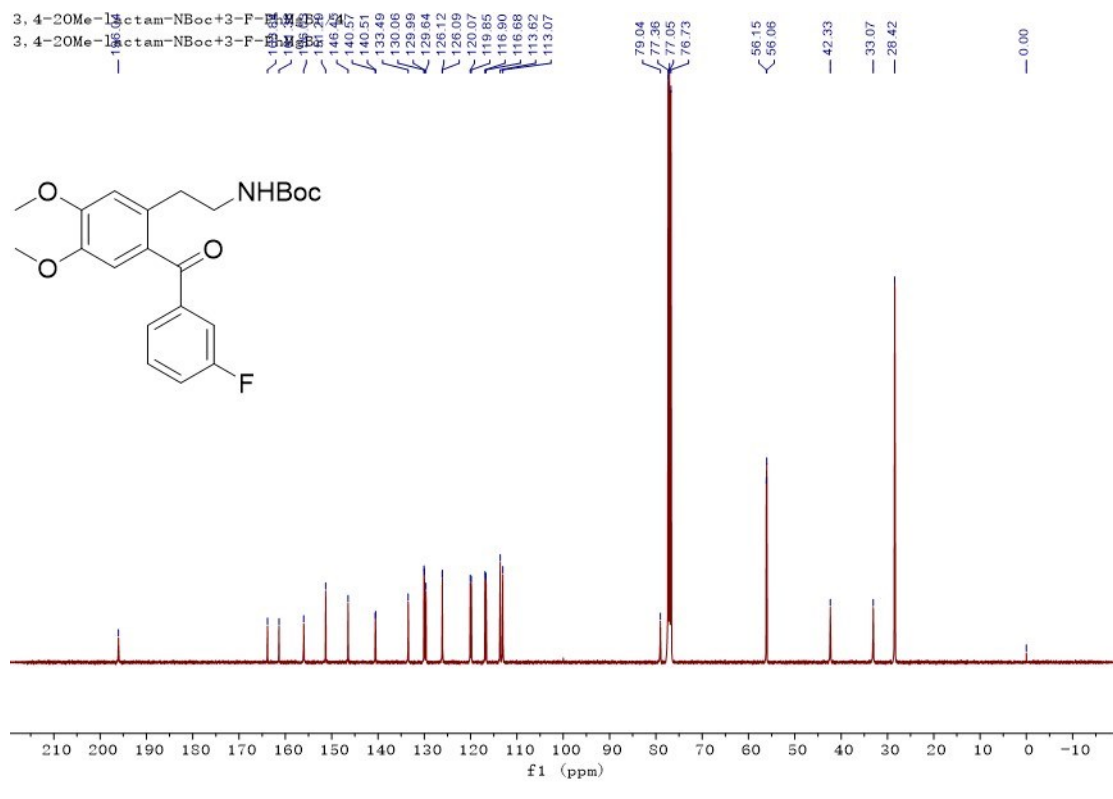

|               |             |                     |                 |              |                        |                     |
|---------------|-------------|---------------------|-----------------|--------------|------------------------|---------------------|
| Sample Name   | Position    | p2a5                | Instrument Name | Instrument 1 | User Name              | G6520B-PC\Admin     |
| Inj Vol       | InjPosition |                     | SampleType      | Sample       | IRM Calibration Status | Success             |
| Data Filename | ACQ Method  | 20110418-M5only-p.m | Comment         |              | Acquired Time          | 7/8/2020 1:47:57 PM |

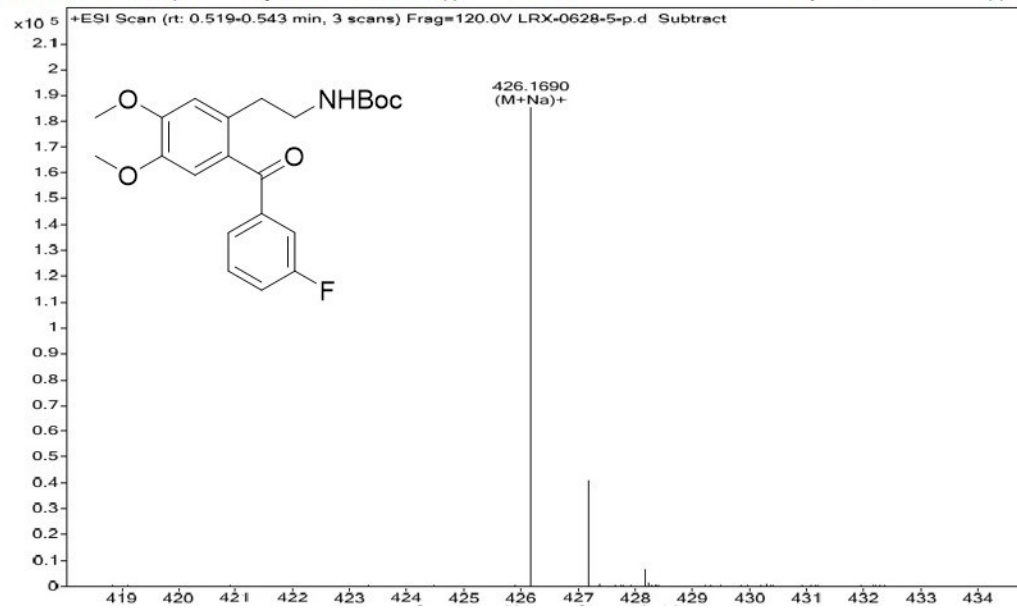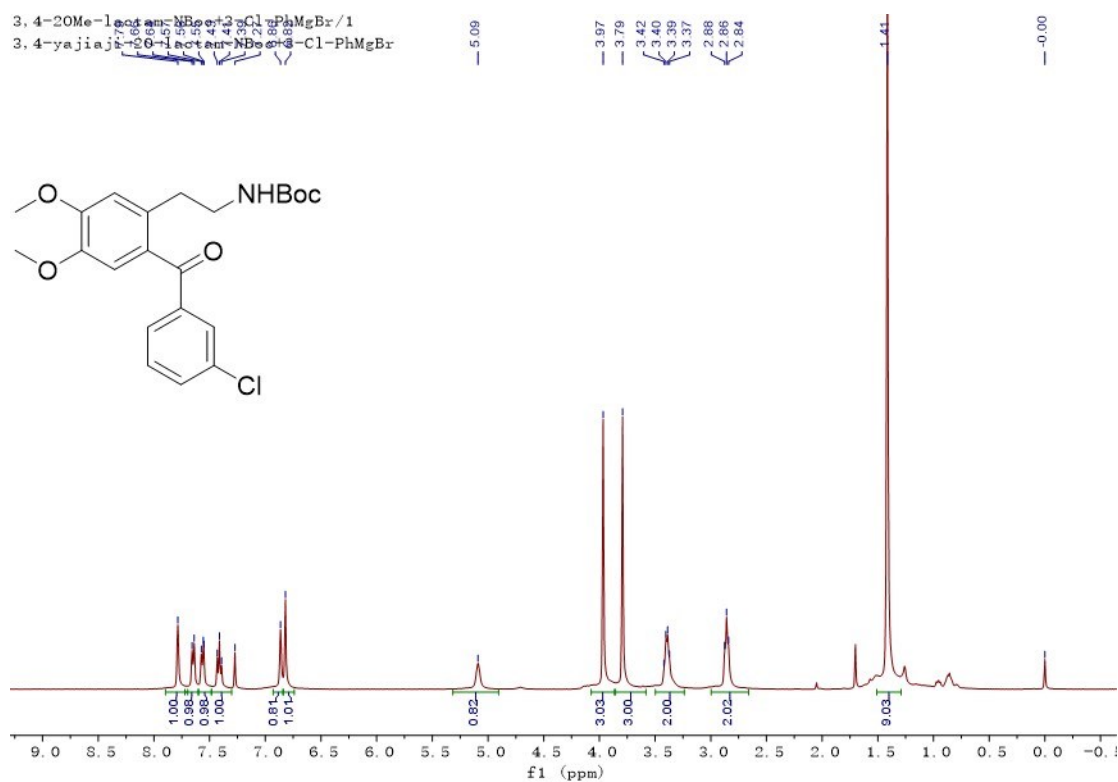

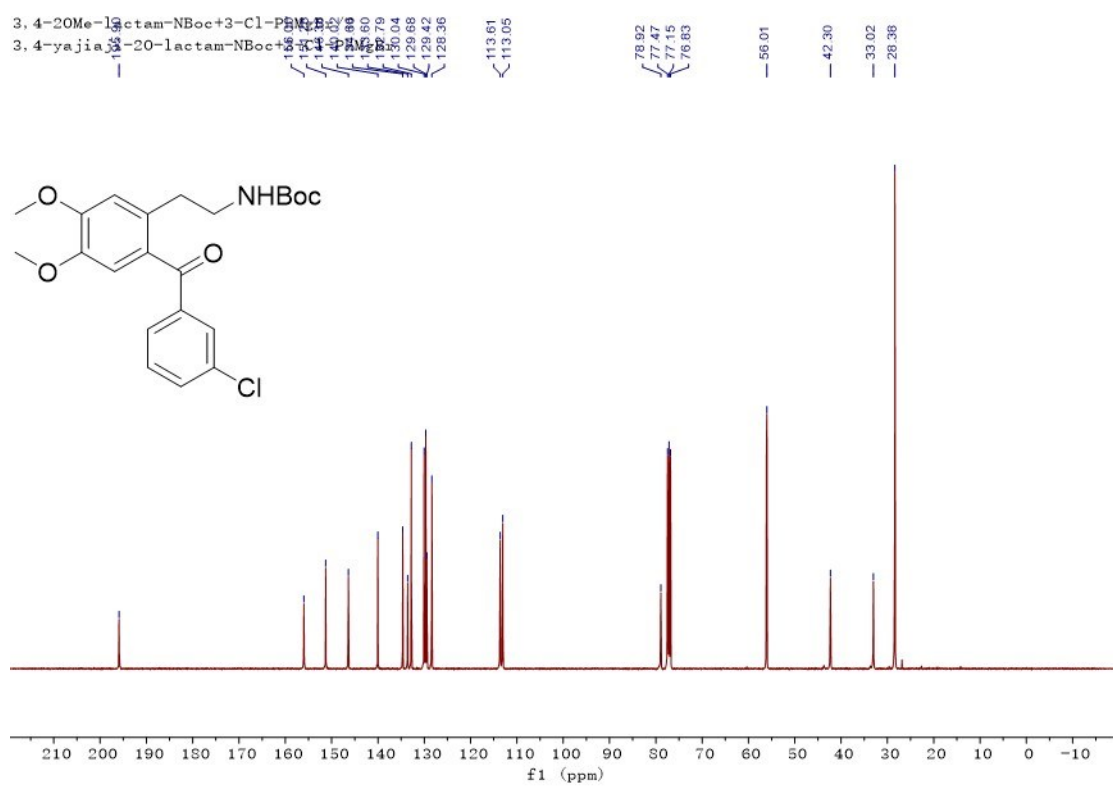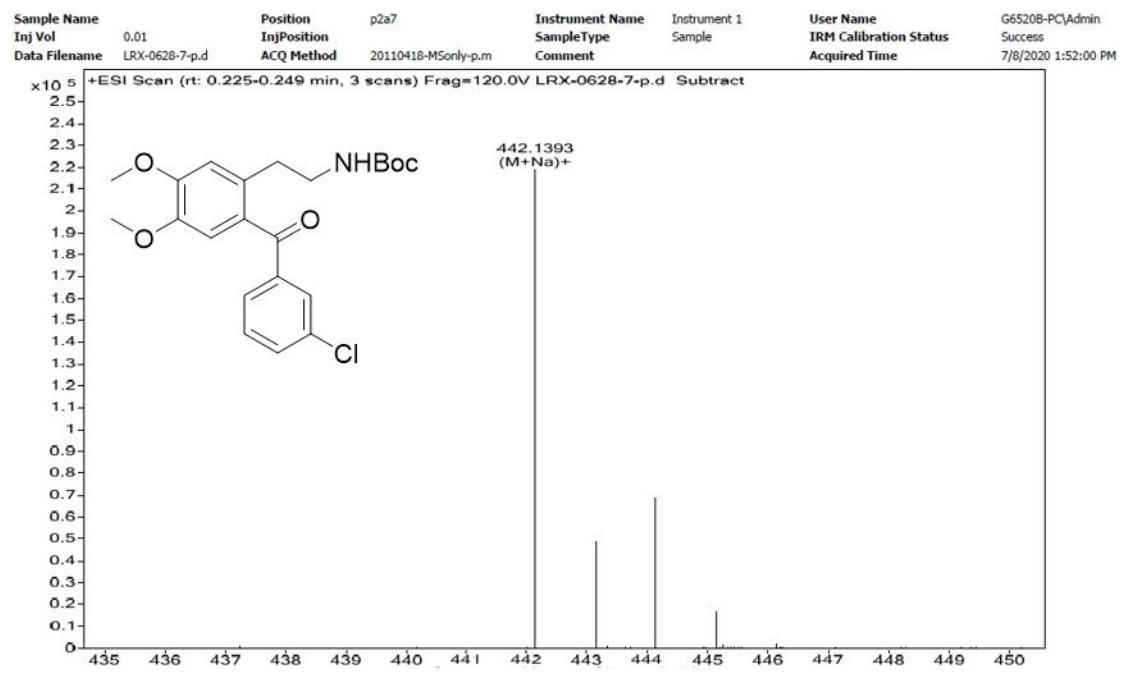



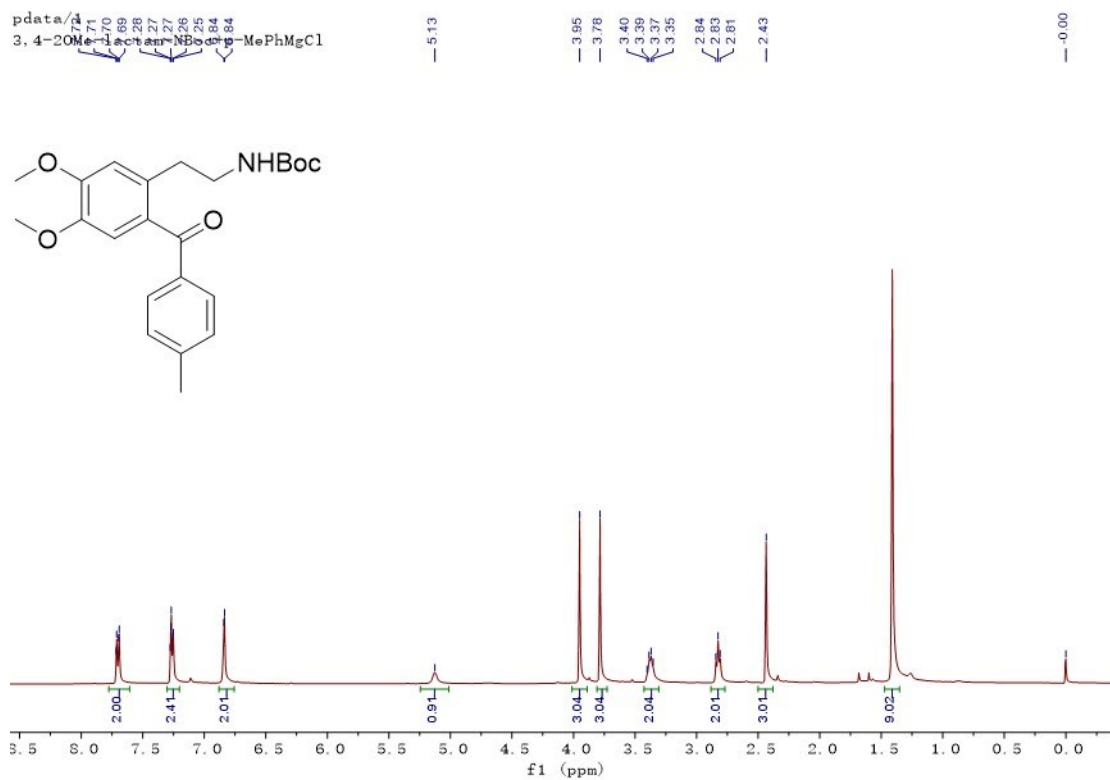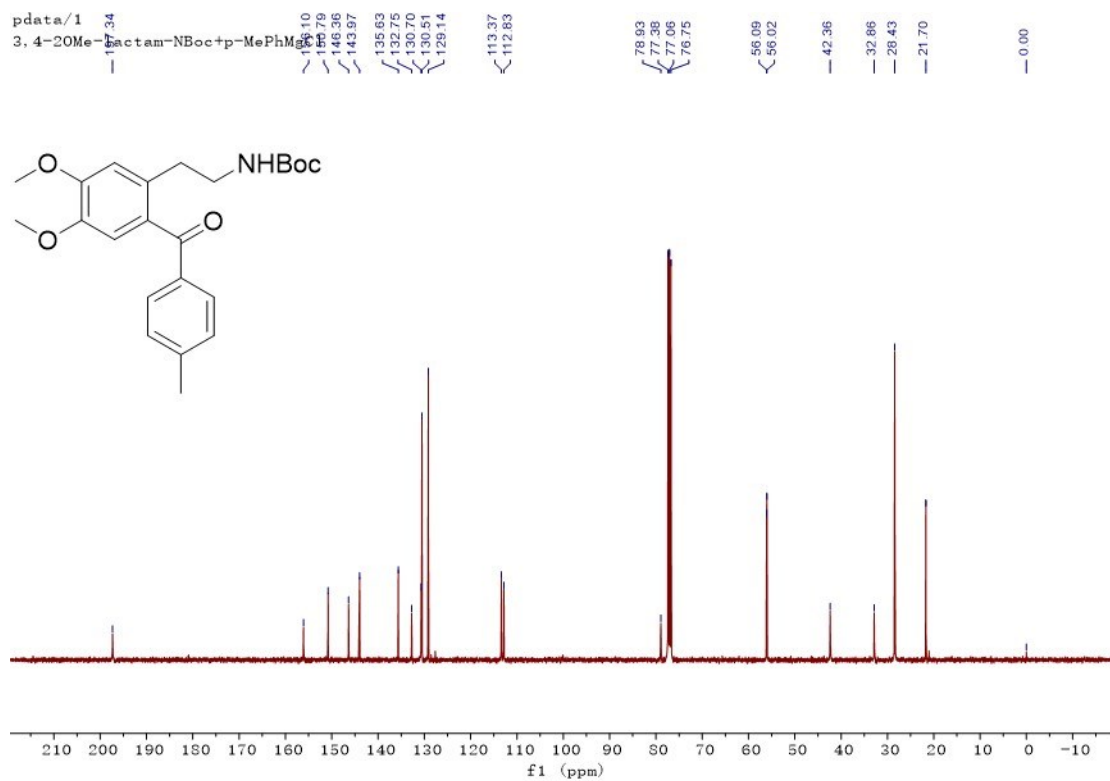

|               |                |             |                     |                 |              |                        |                      |
|---------------|----------------|-------------|---------------------|-----------------|--------------|------------------------|----------------------|
| Sample Name   | 0.01           | Position    | p2D1                | Instrument Name | Instrument 1 | User Name              | G6520B-PC\Admin      |
| Inj Vol       | 0.01           | InjPosition |                     | SampleType      | Sample       | IRM Calibration Status | Success              |
| Data Filename | LRX-0509-3-p.d | ACQ Method  | 20110418-MSonly-p.m | Comment         |              | Acquired Time          | 5/12/2020 3:39:04 PM |

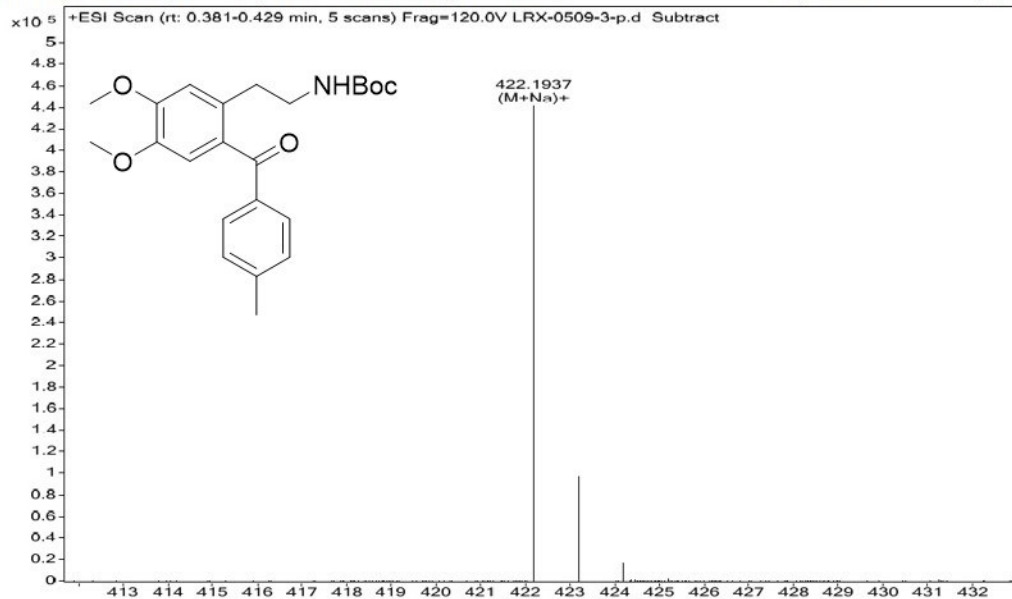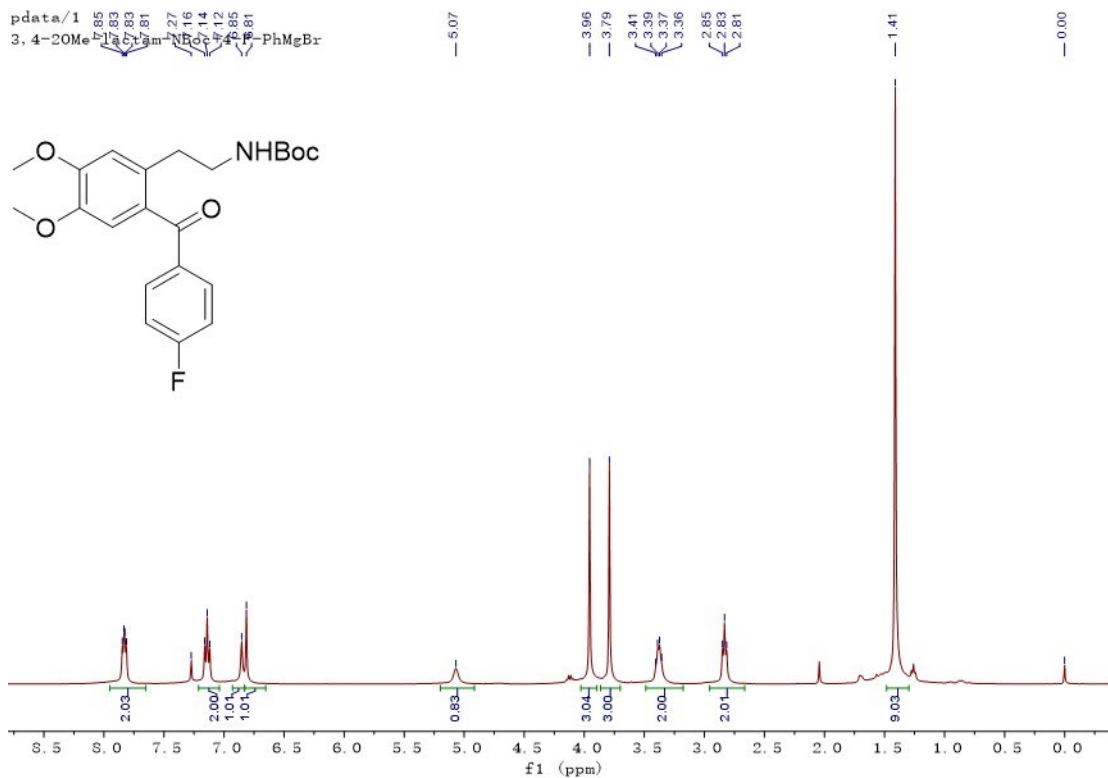

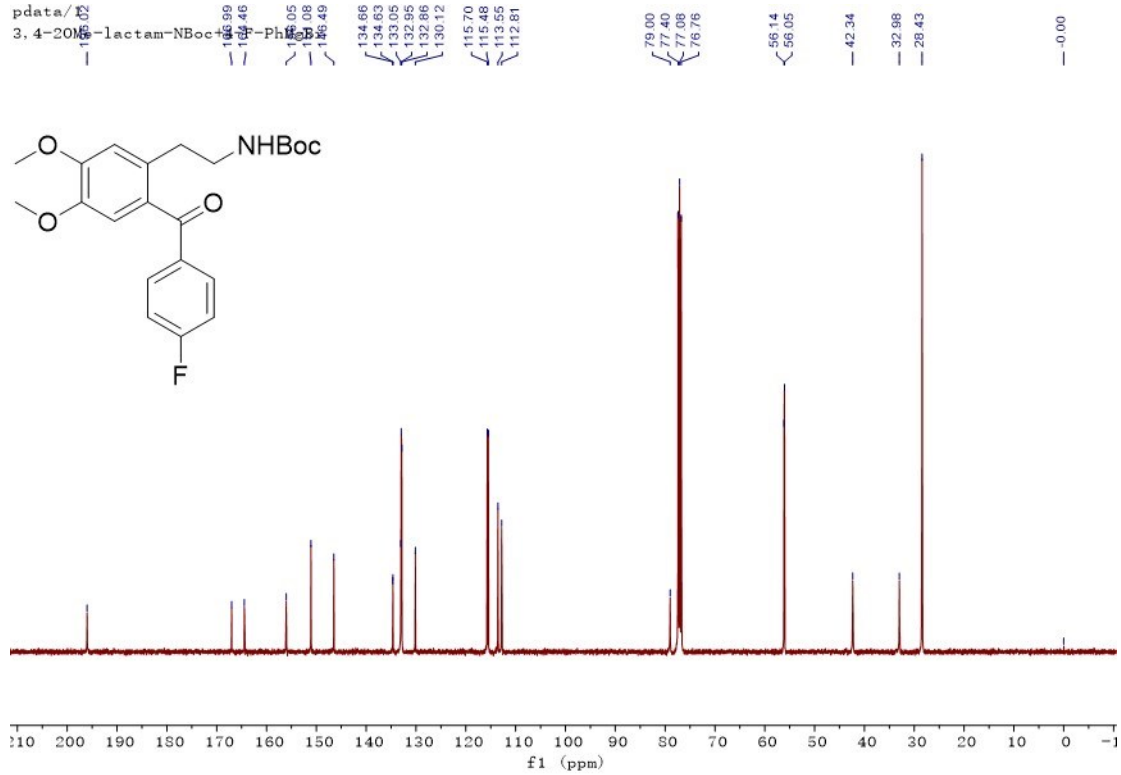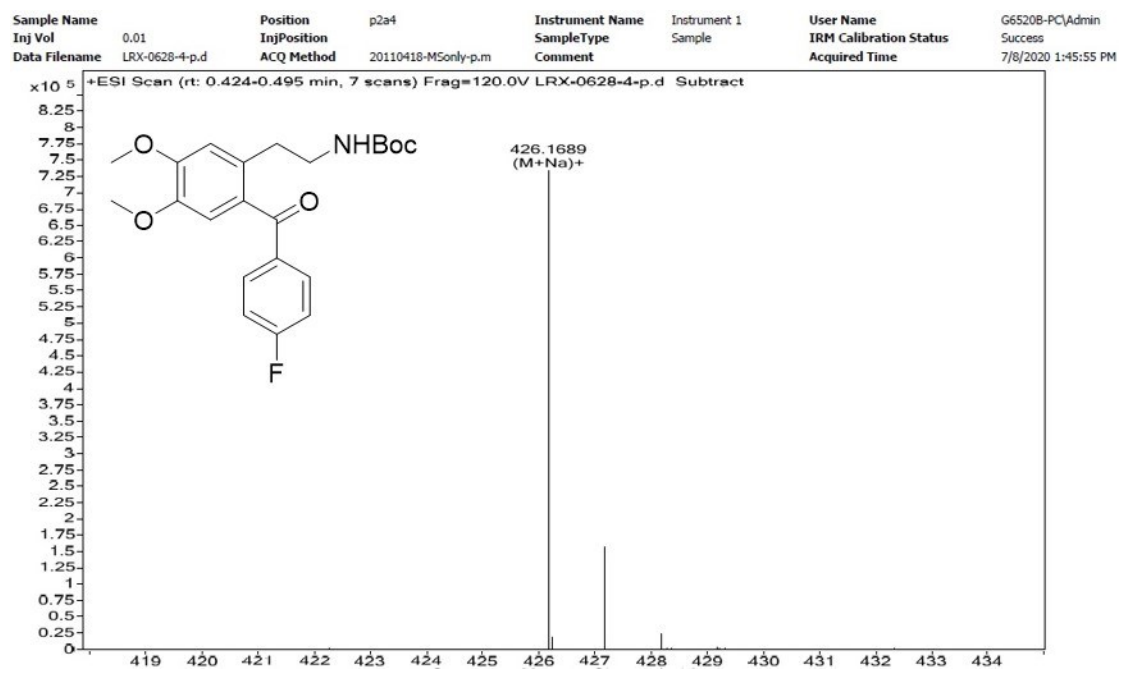

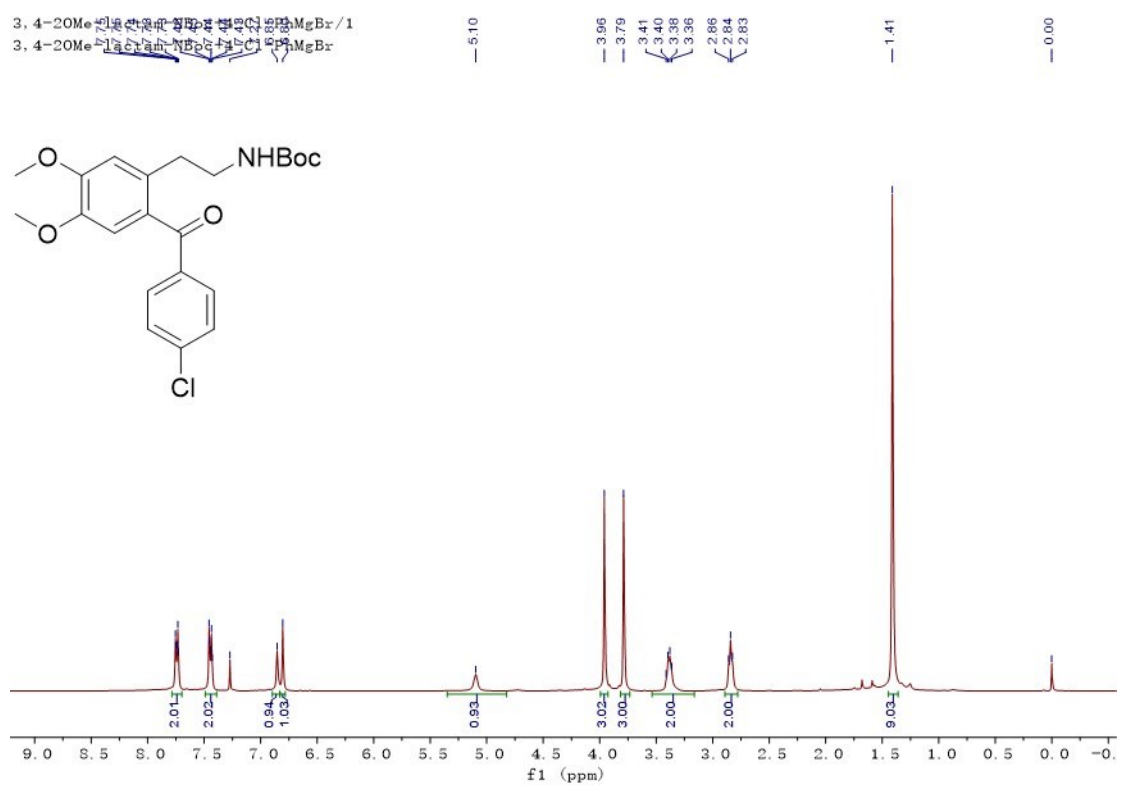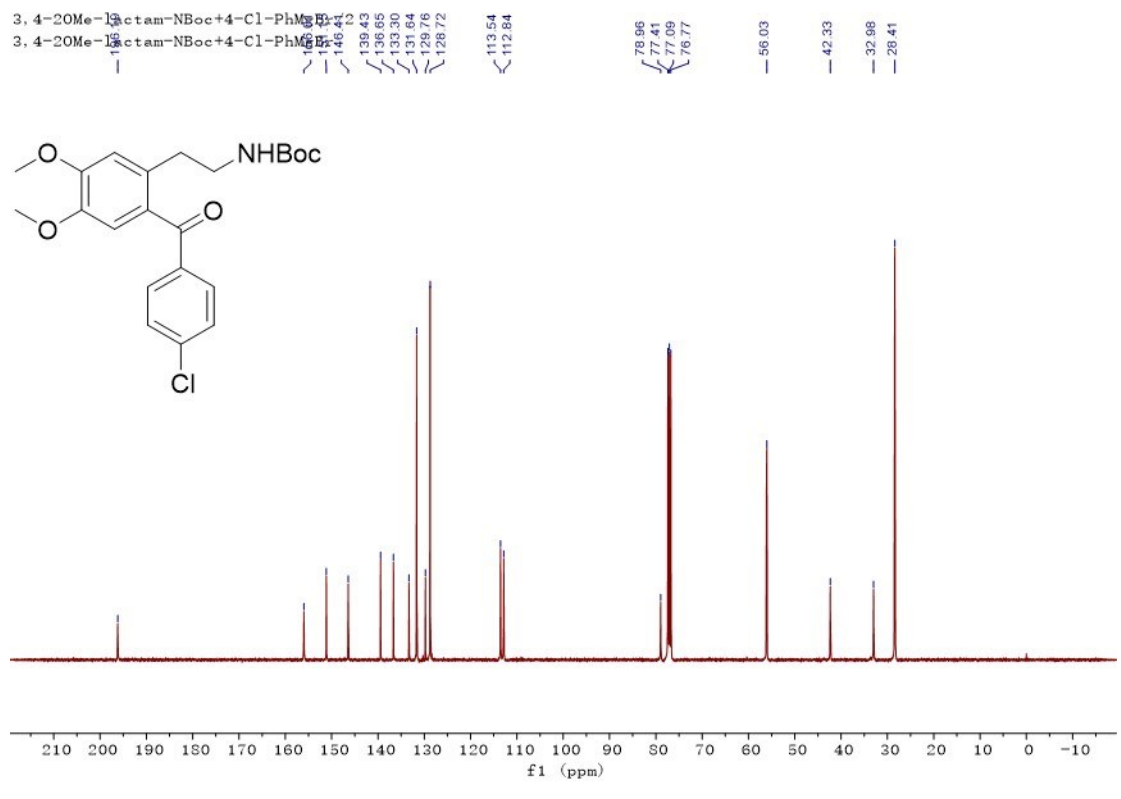

| Sample Name   | Position       | p2a6        | Instrument Name     | Instrument 1 | User Name              | G65208-PC\Admin     |
|---------------|----------------|-------------|---------------------|--------------|------------------------|---------------------|
| Inj Vol       | 0.01           | InjPosition | SampleType          | Sample       | IRM Calibration Status | Success             |
| Data Filename | LRX-0628-6-p.d | ACQ Method  | 20110418-M5only-p.m | Comment      | Acquired Time          | 7/8/2020 1:49:46 PM |

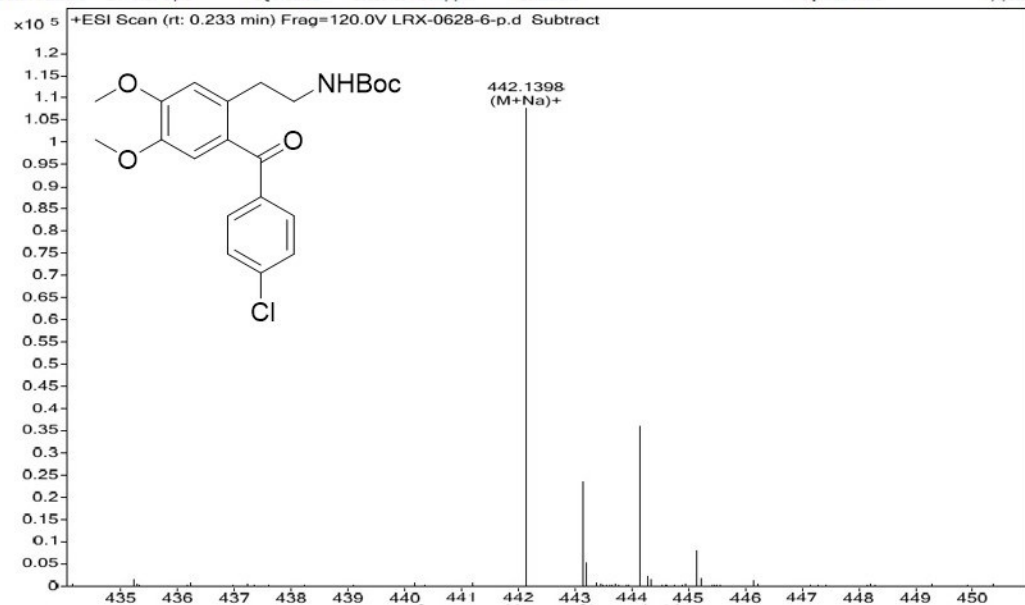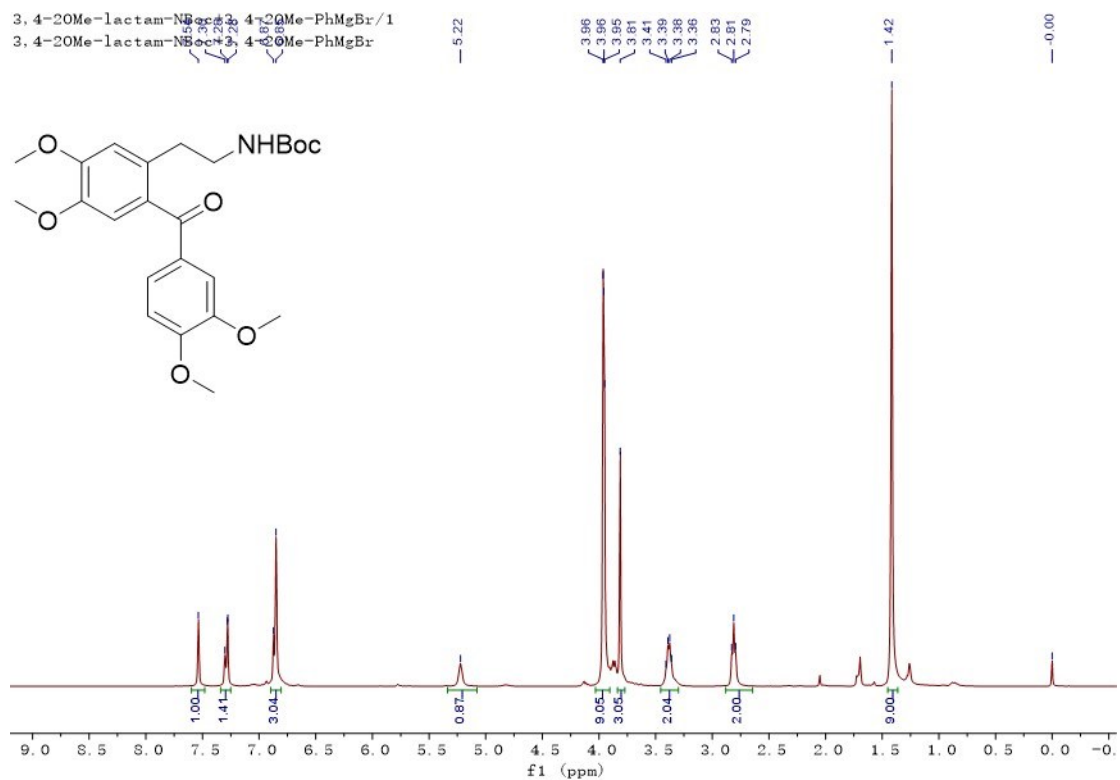

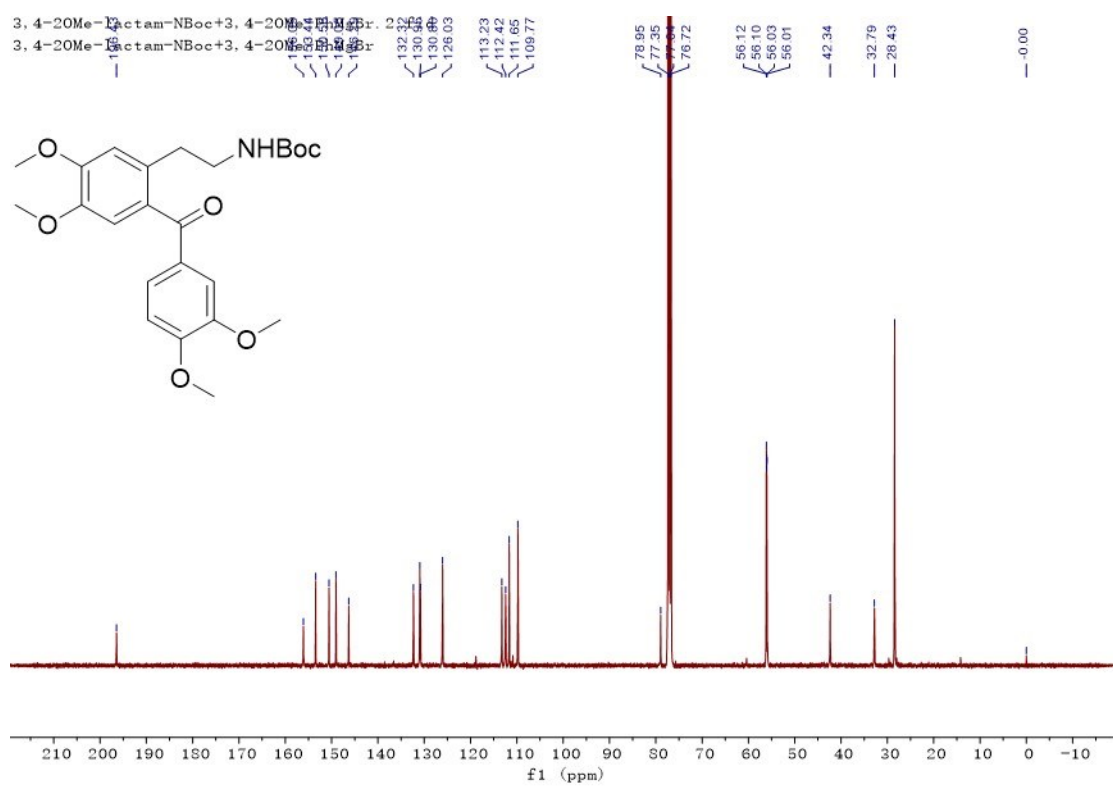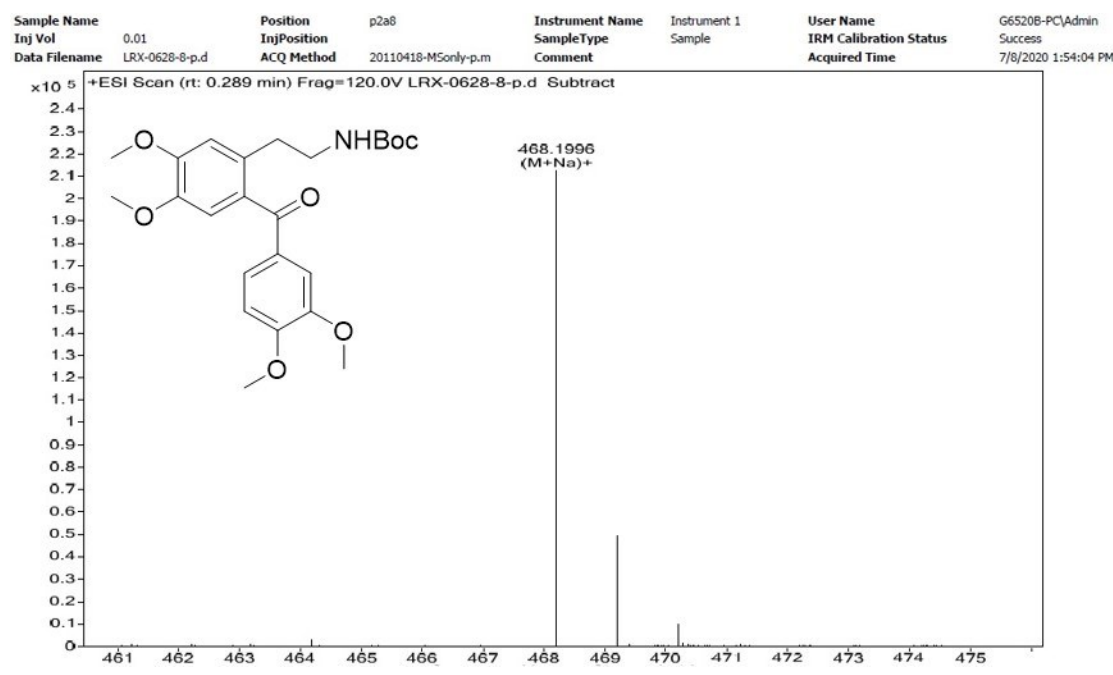

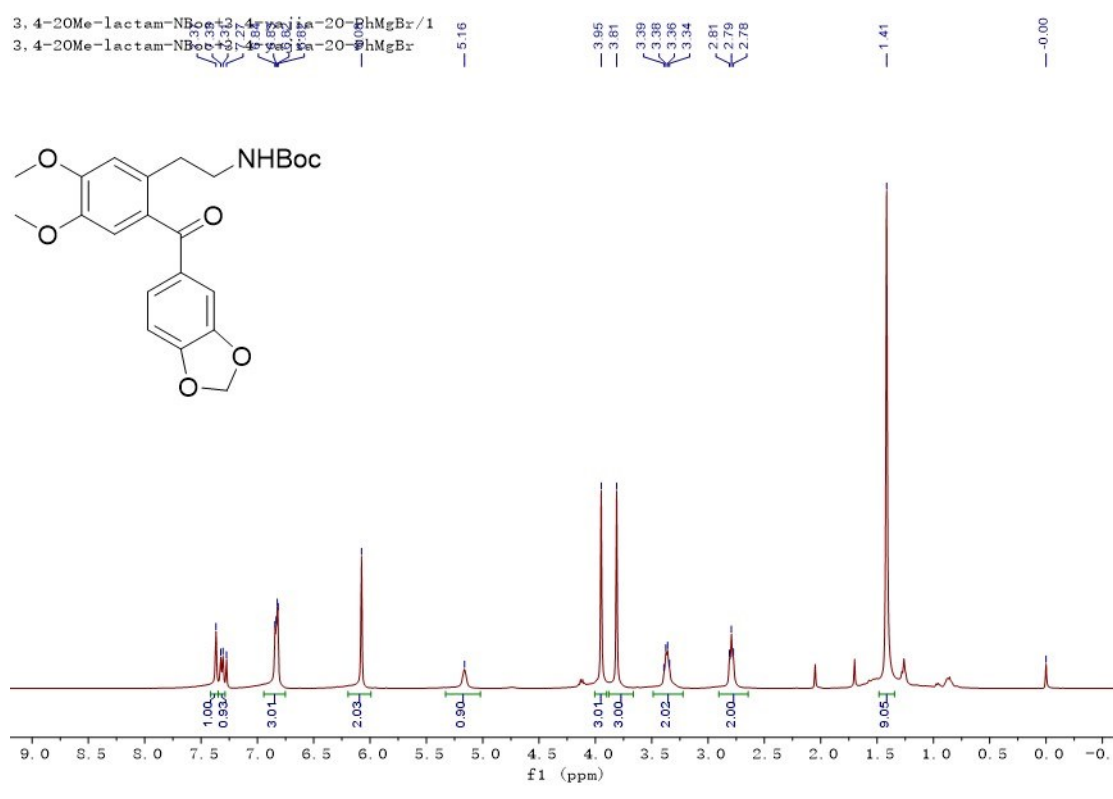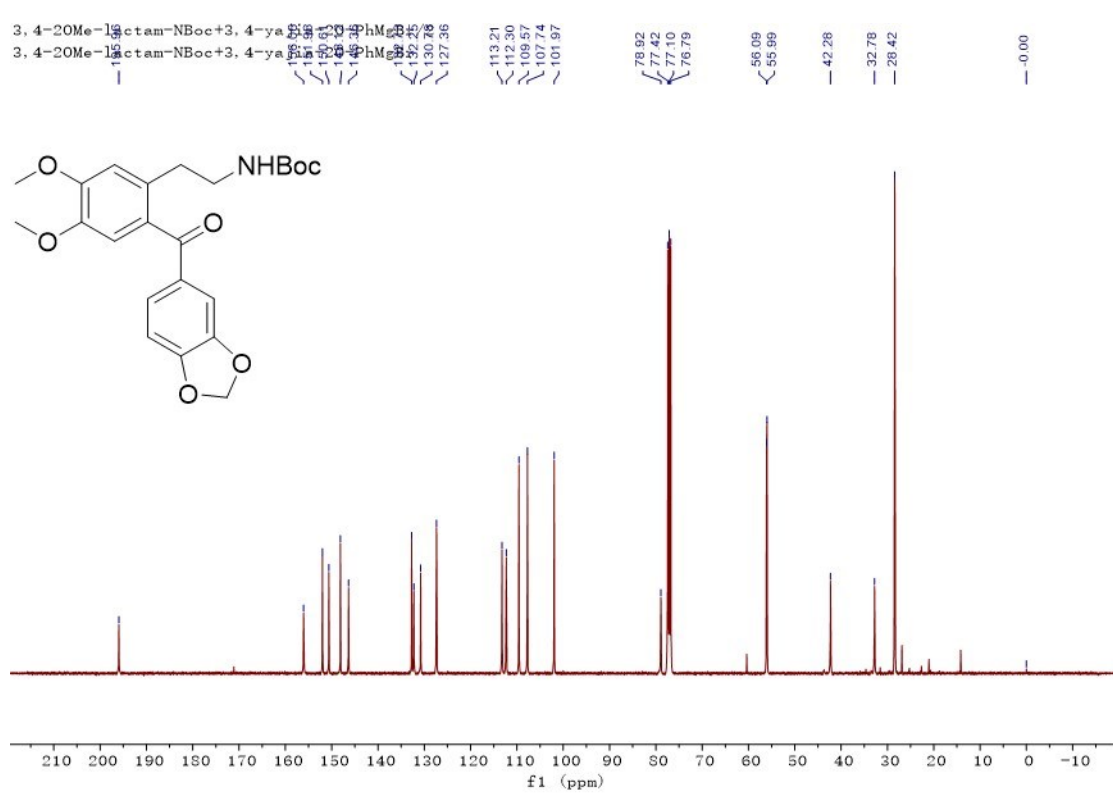

|               |                |             |                     |                 |              |                        |                     |
|---------------|----------------|-------------|---------------------|-----------------|--------------|------------------------|---------------------|
| Sample Name   | 0.01           | Position    | p2a9                | Instrument Name | Instrument 1 | User Name              | G65208-PC\Admin     |
| Inj Vol       | 0.01           | InjPosition |                     | SampleType      | Sample       | IRM Calibration Status | Success             |
| Data Filename | LRX-0628-9-p.d | ACQ Method  | 20110418-M5only-p.m | Comment         |              | Acquired Time          | 7/8/2020 1:55:52 PM |

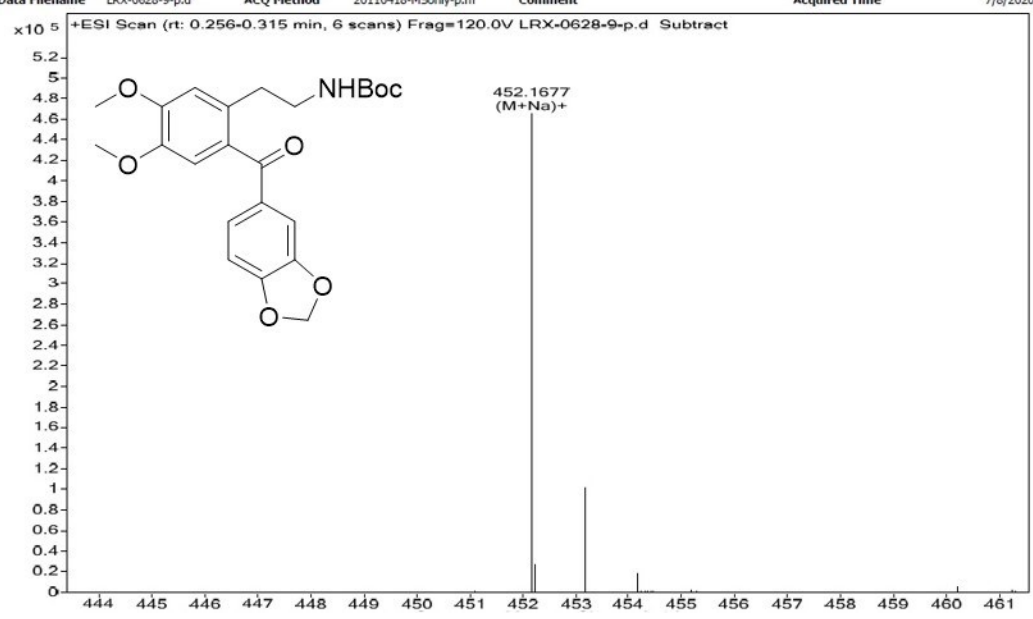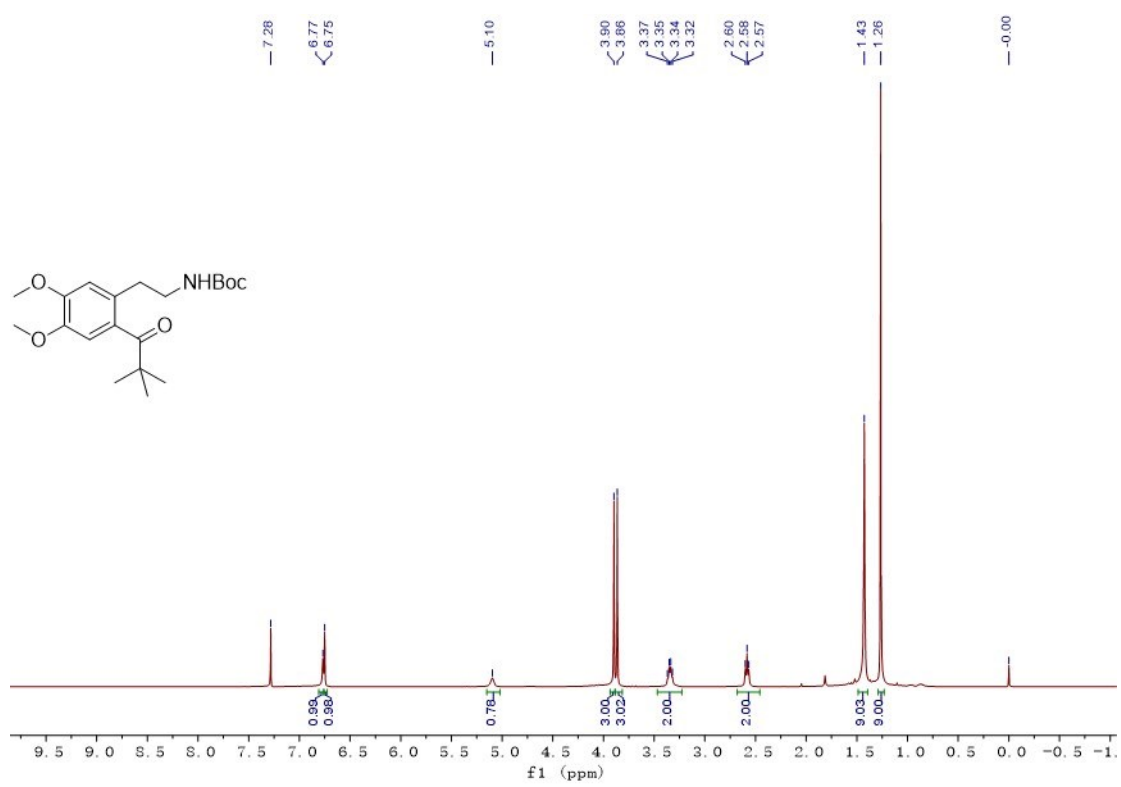



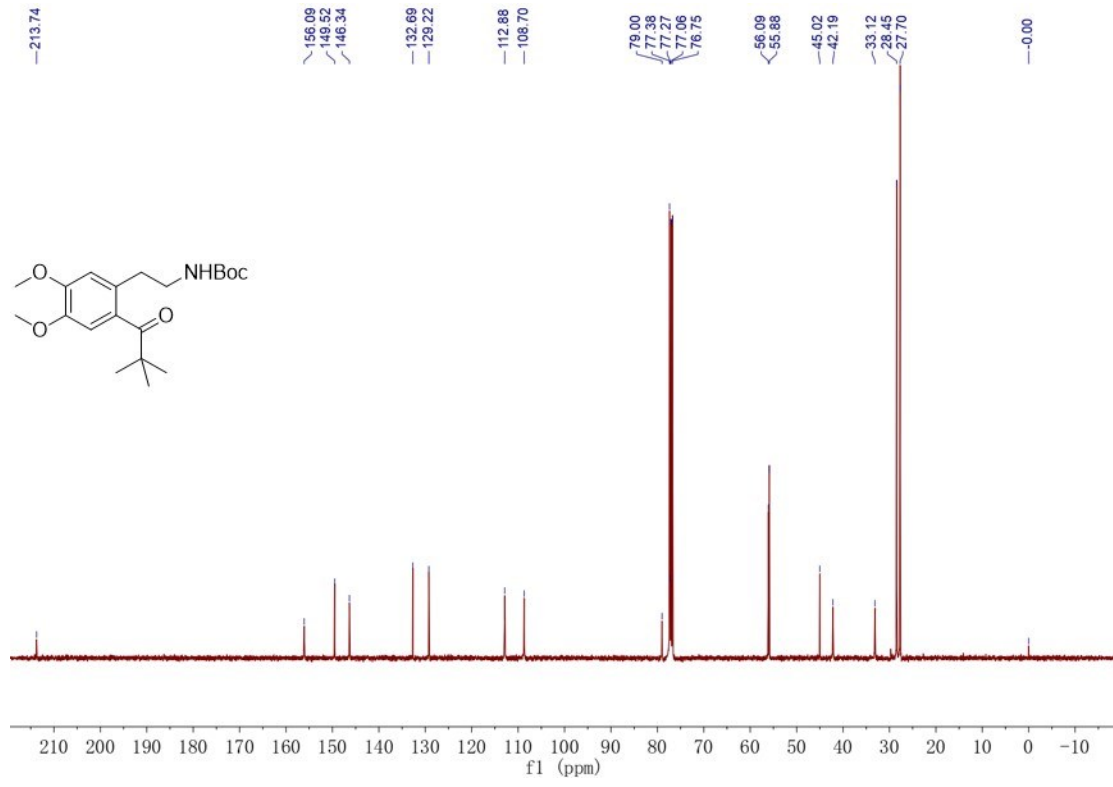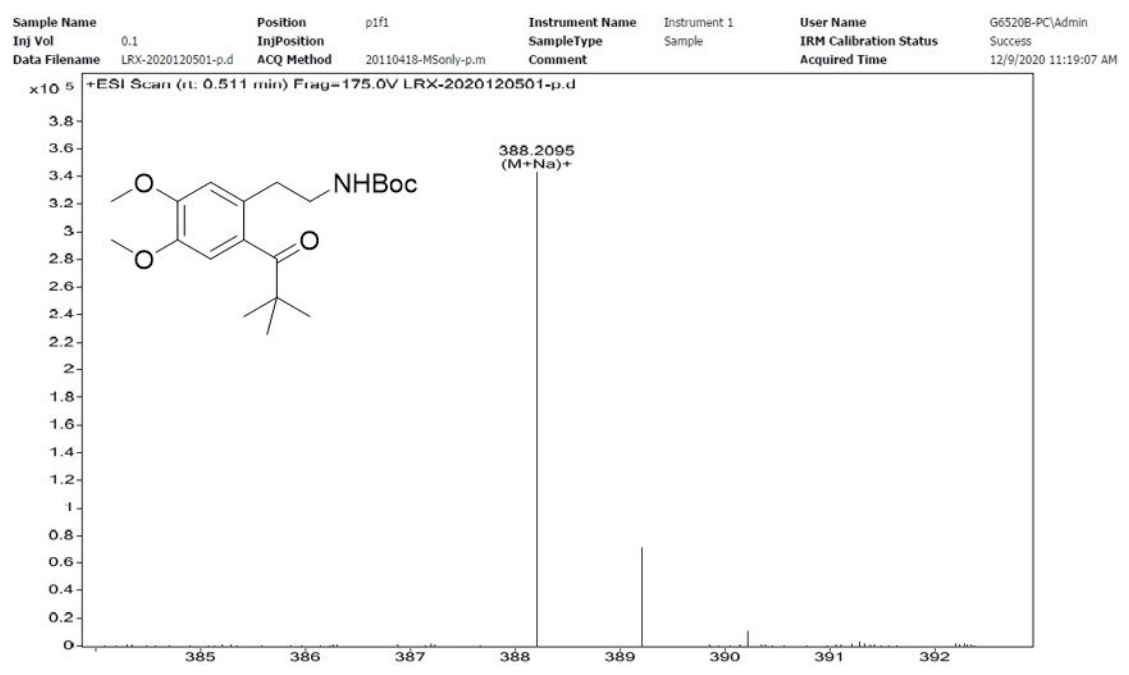

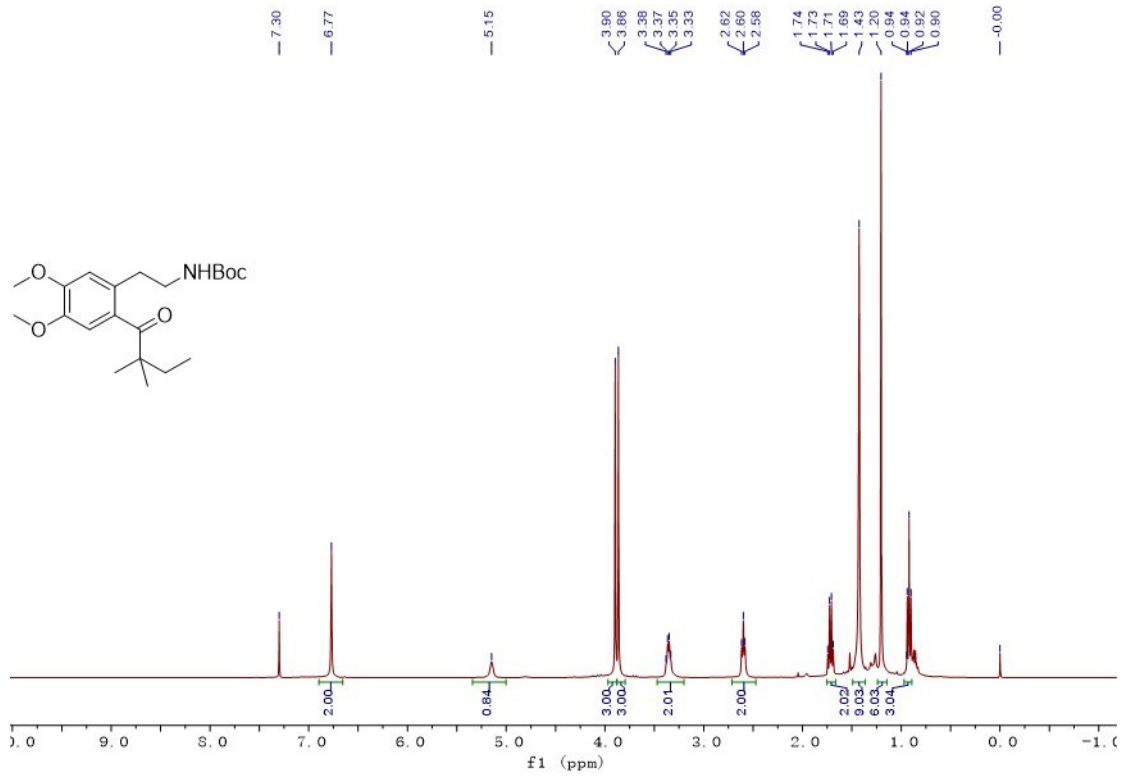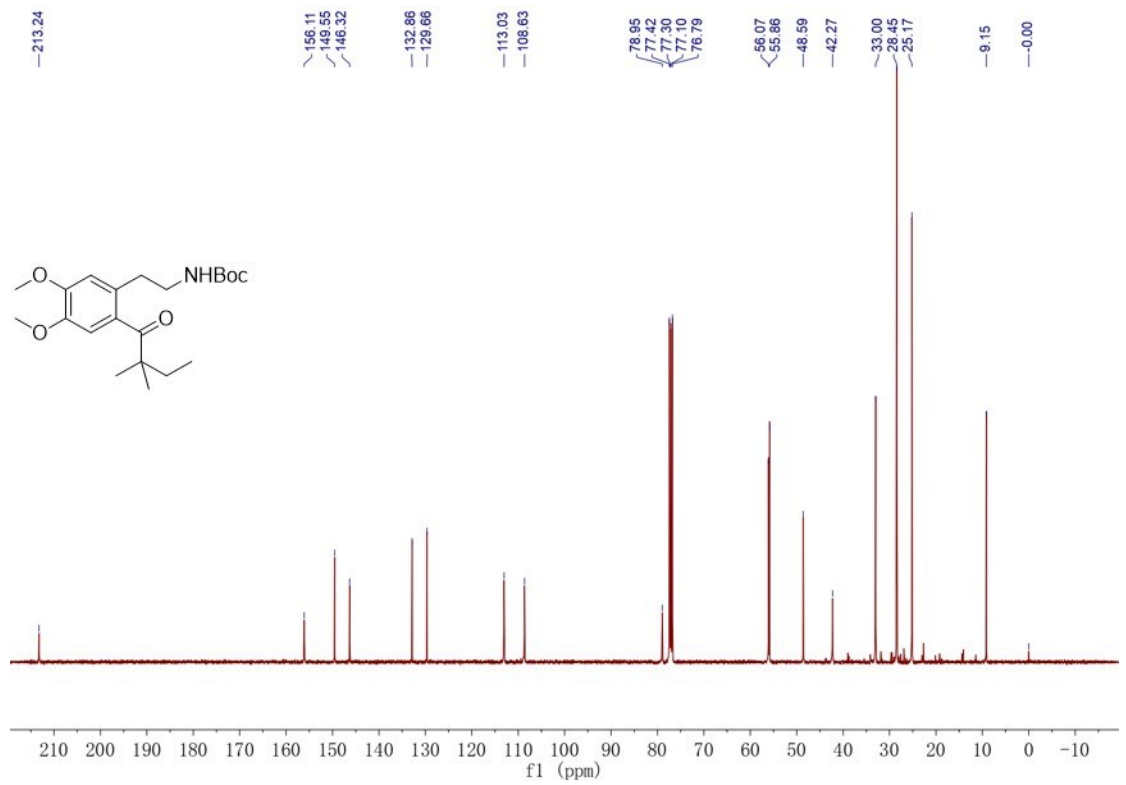

Sample Name: p1f2  
 Inj Vol: 0.1  
 Data Filename: LRX-2020120502-p.d  
 Position: p1f2  
 InjPosition: InjPosition  
 ACQ Method: 20110418-M5only-p.m  
 Instrument Name: Instrument 1  
 SampleType: Sample  
 Comment:  
 User Name: G65208-PC\Admin  
 IRM Calibration Status: Success  
 Acquired Time: 12/9/2020 11:21:56 AM

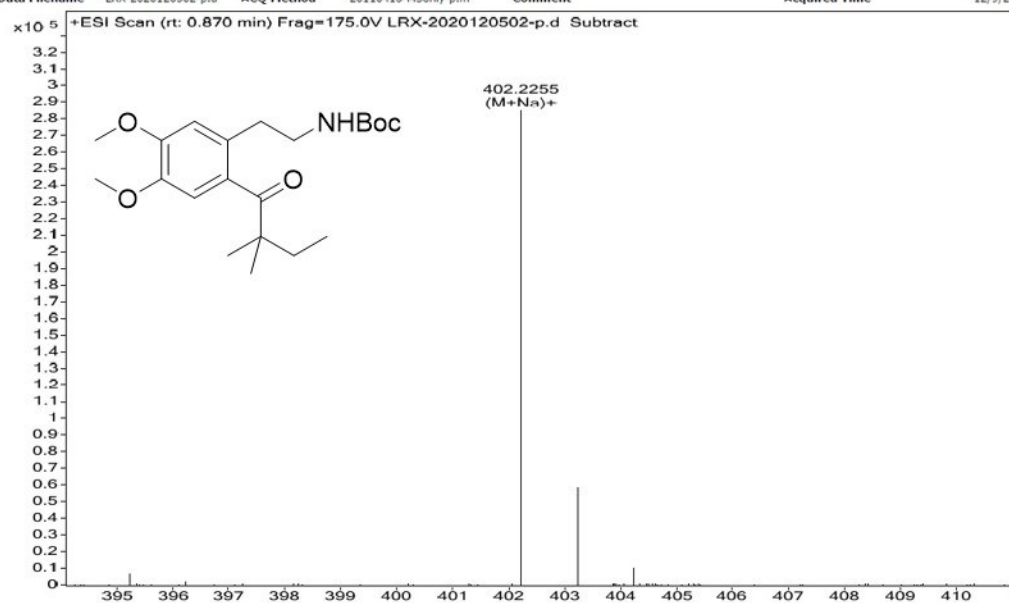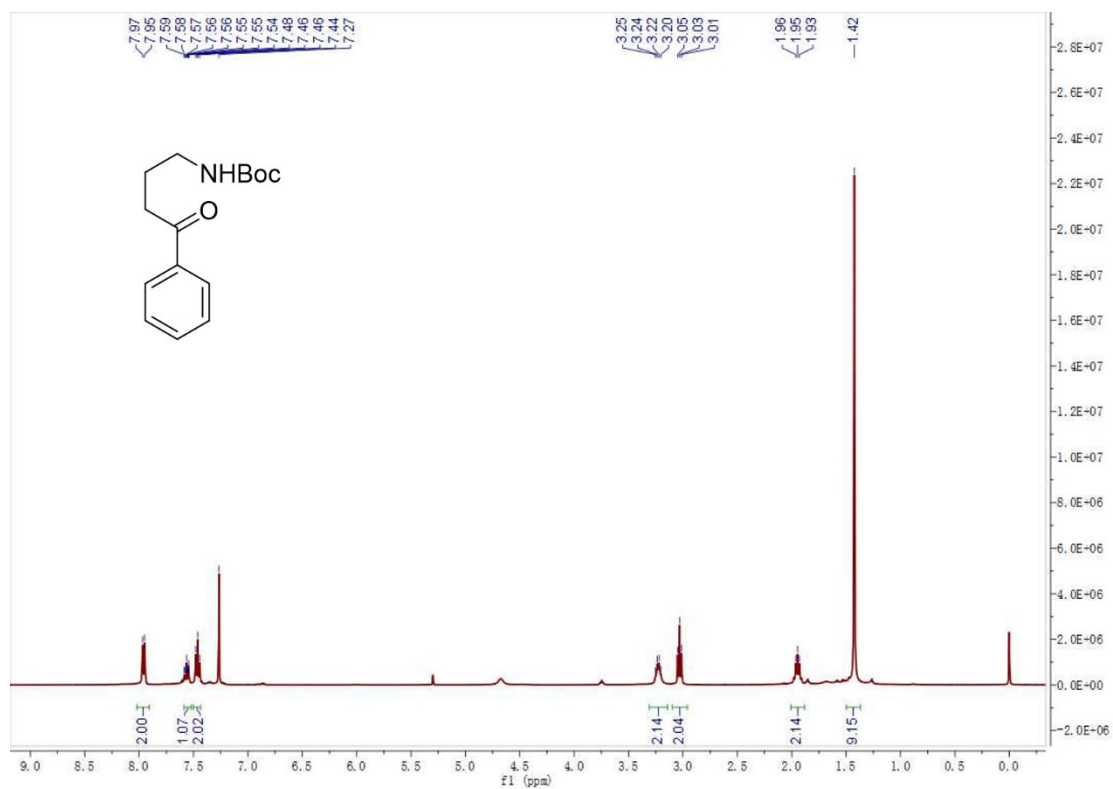

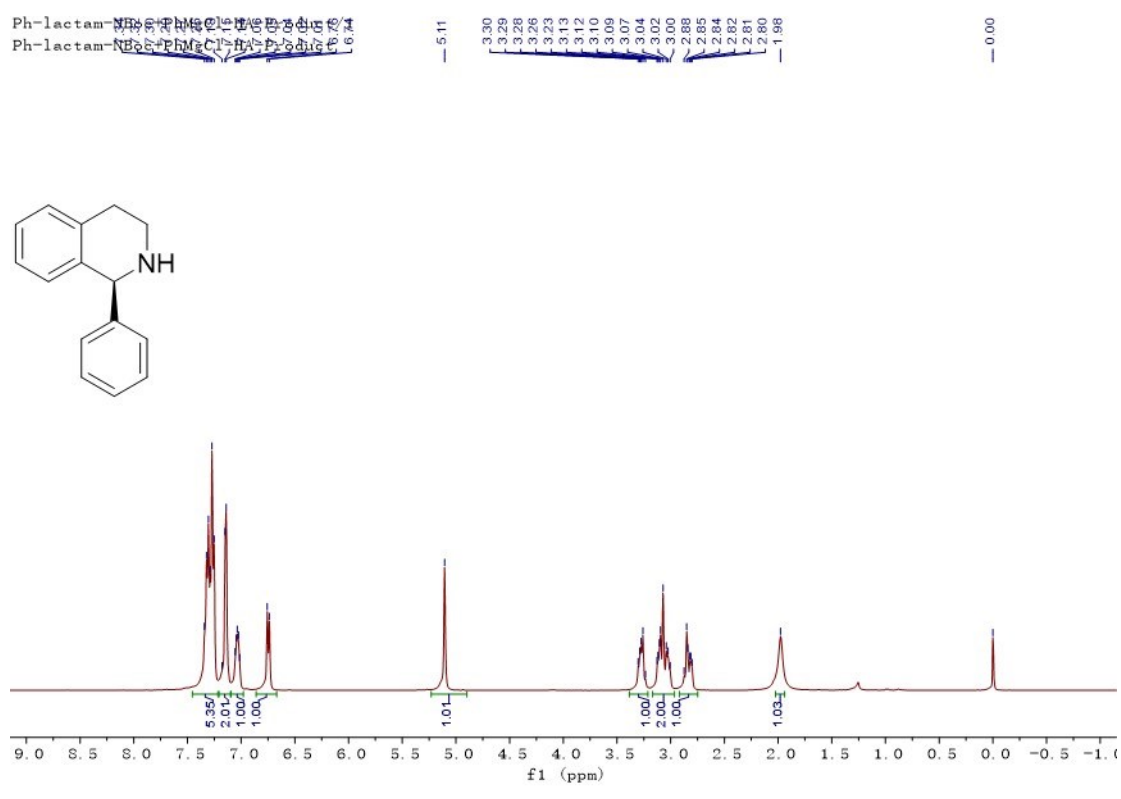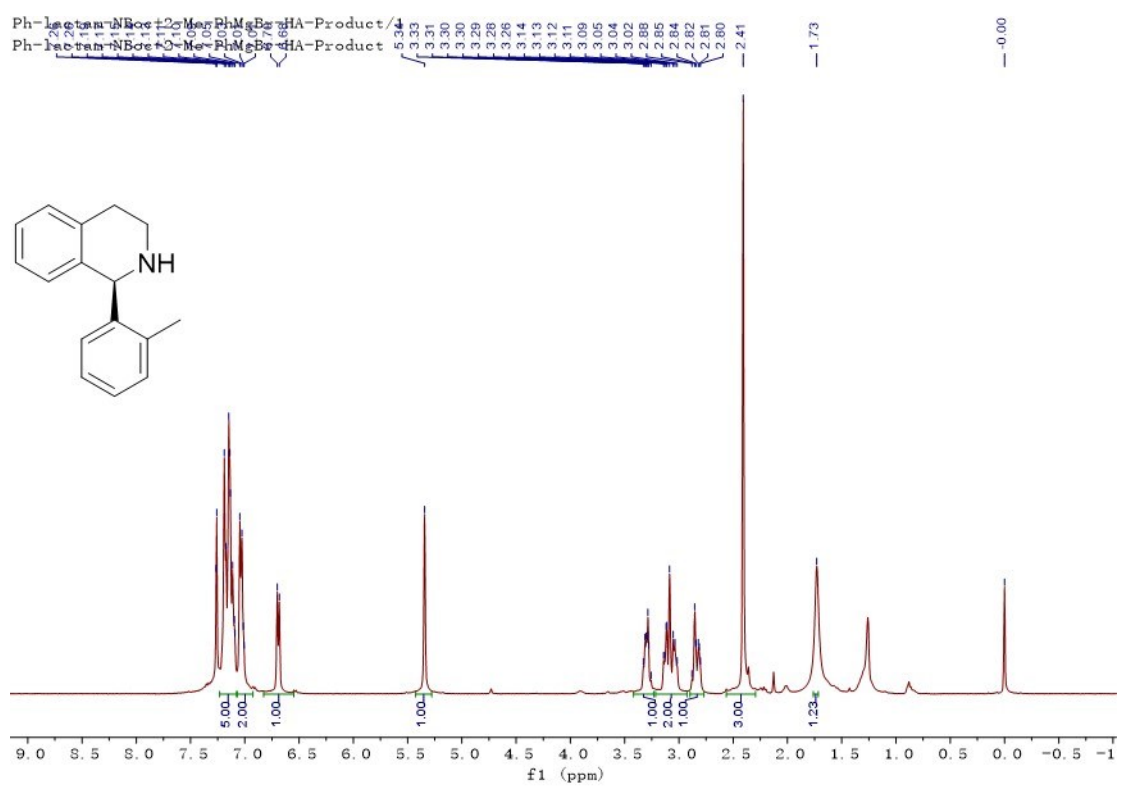

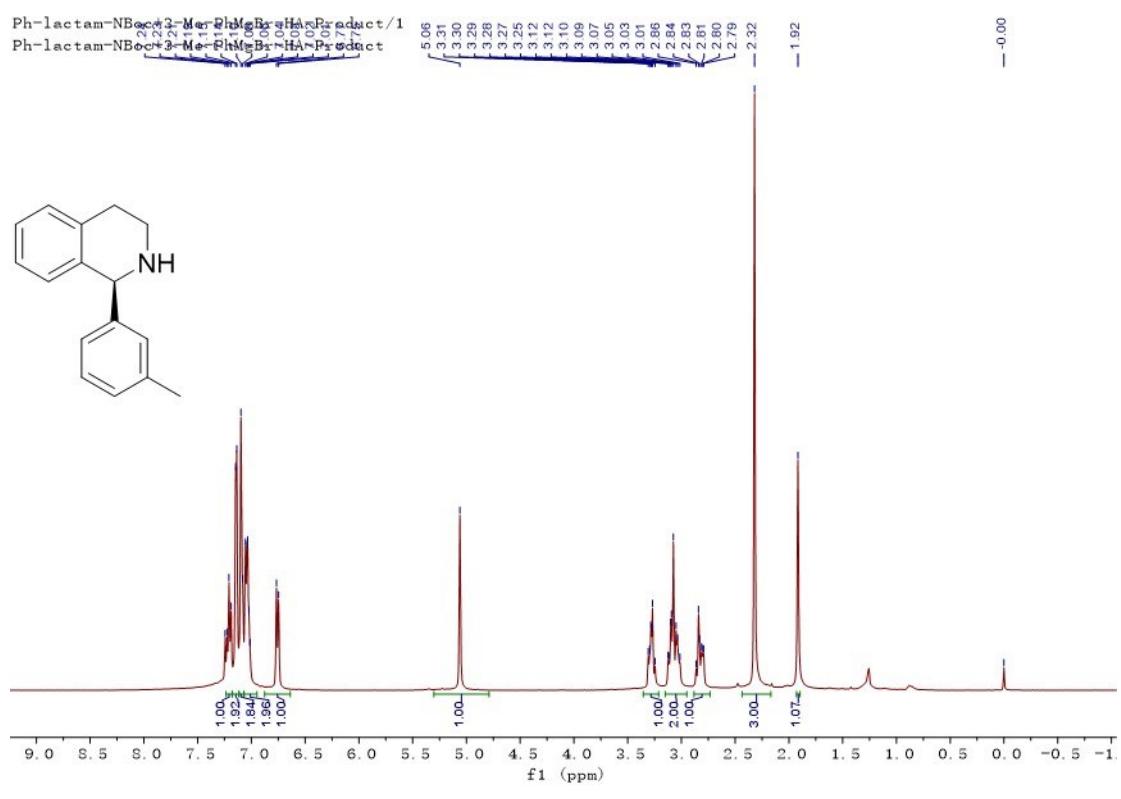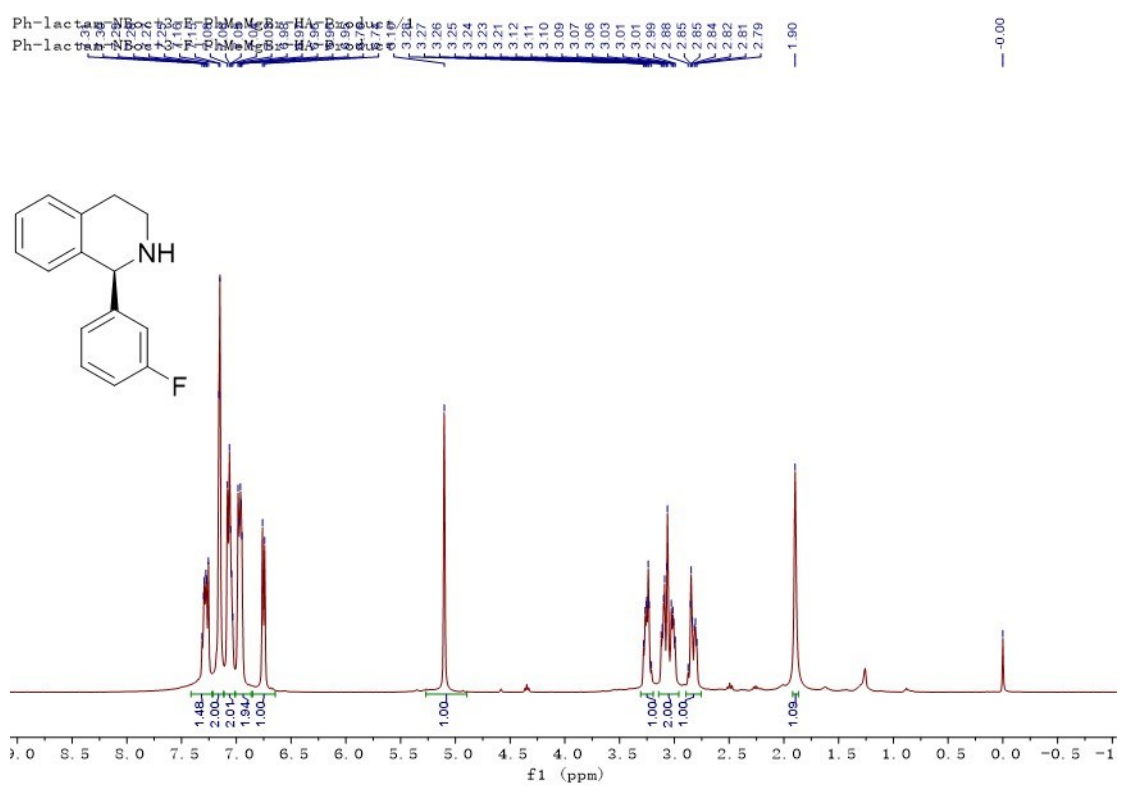

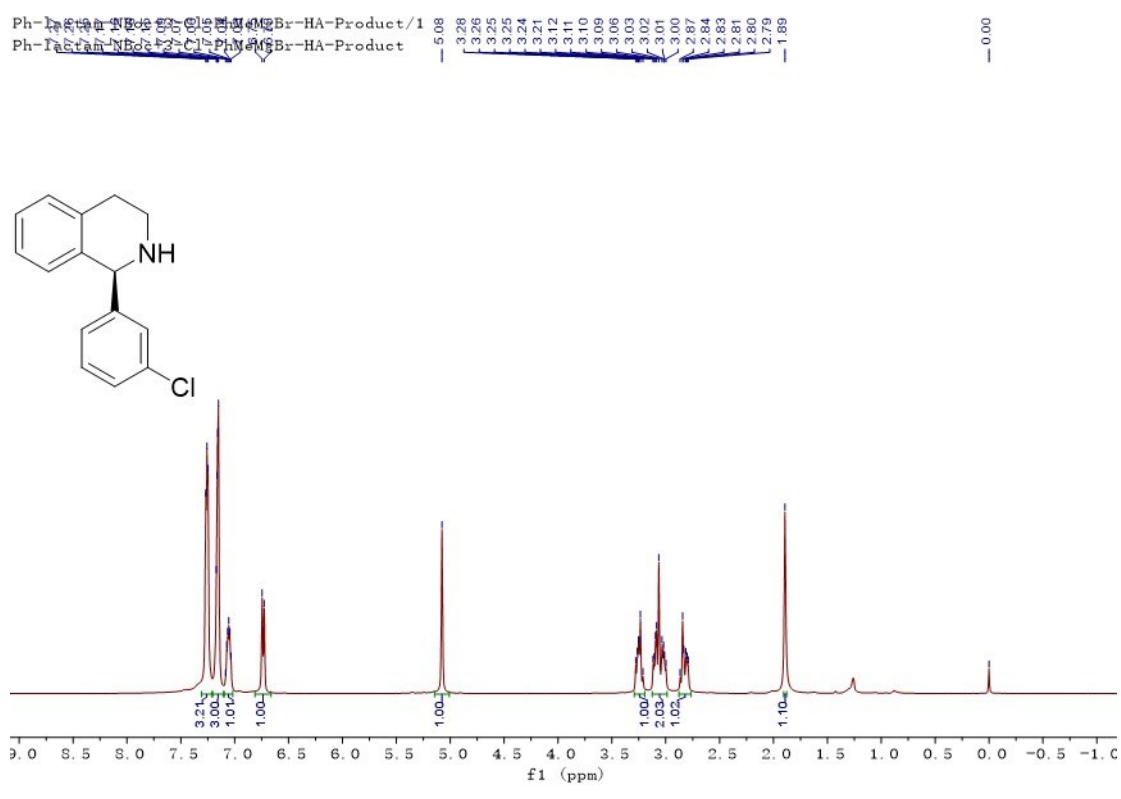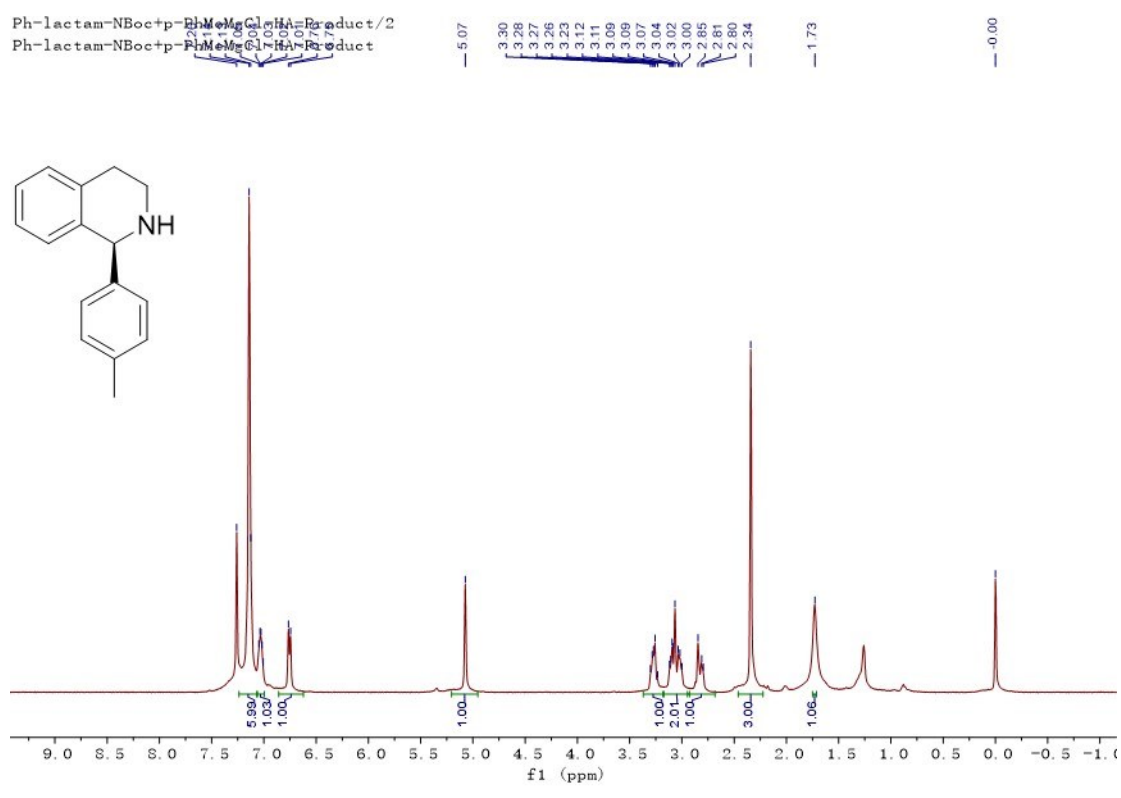

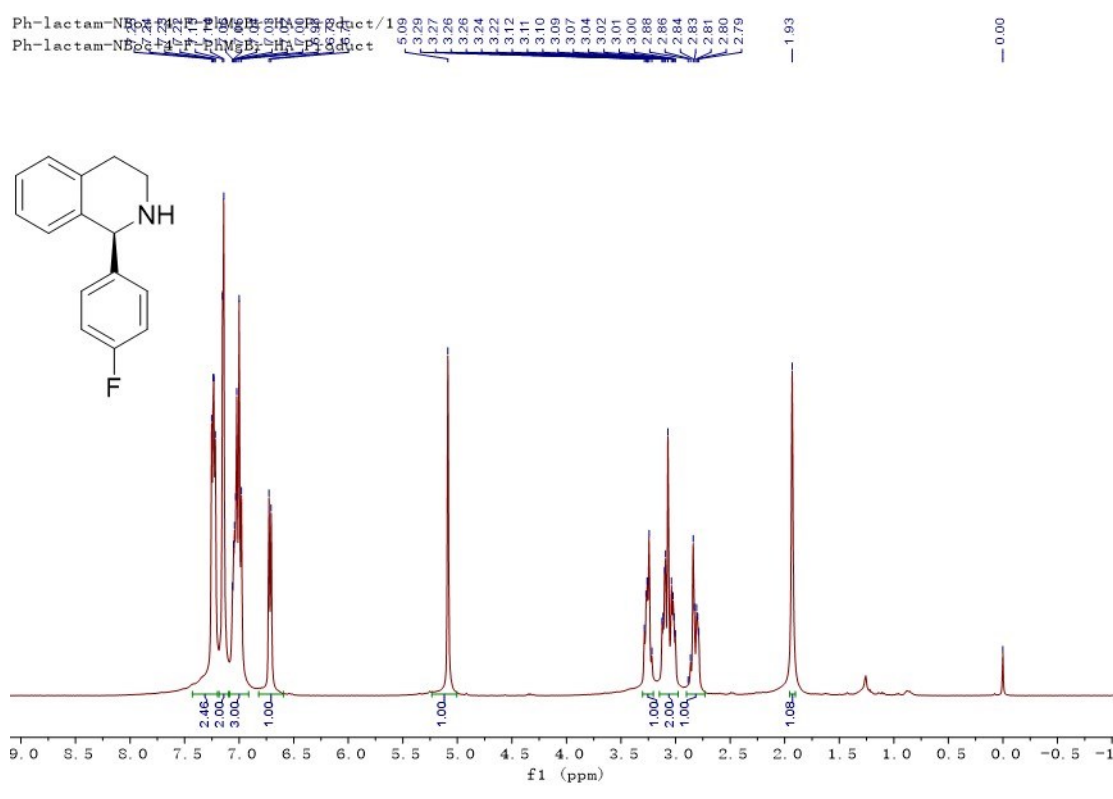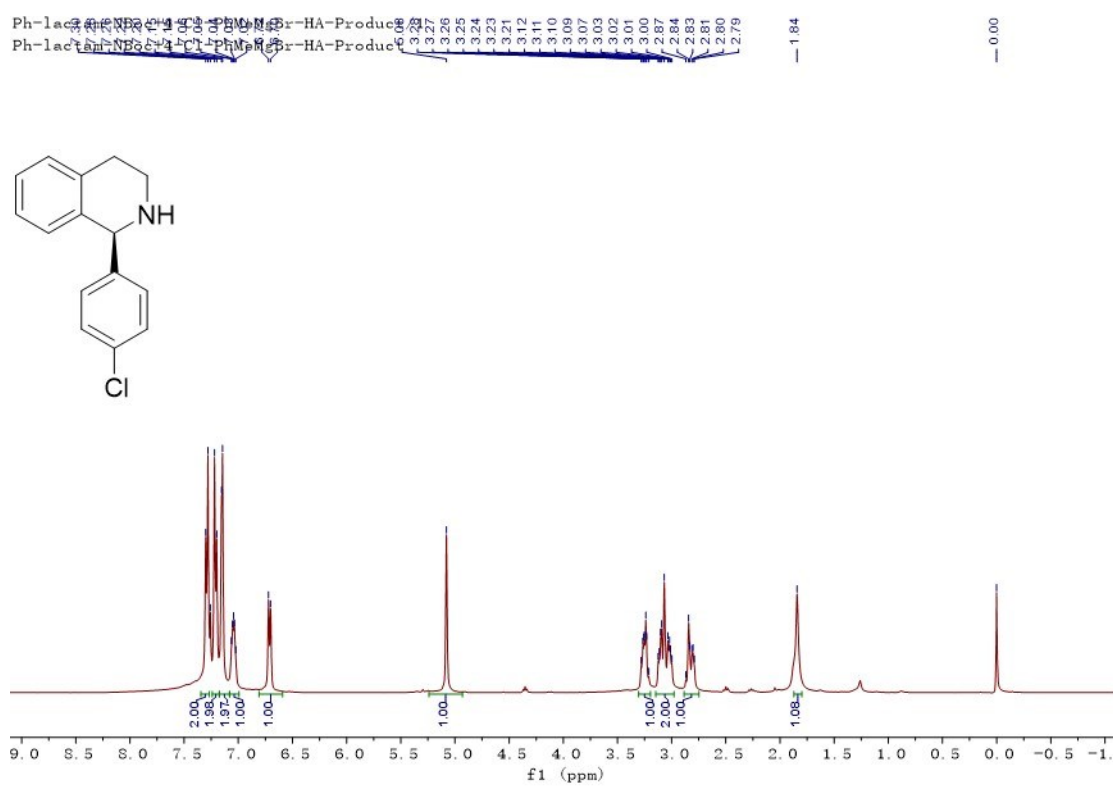

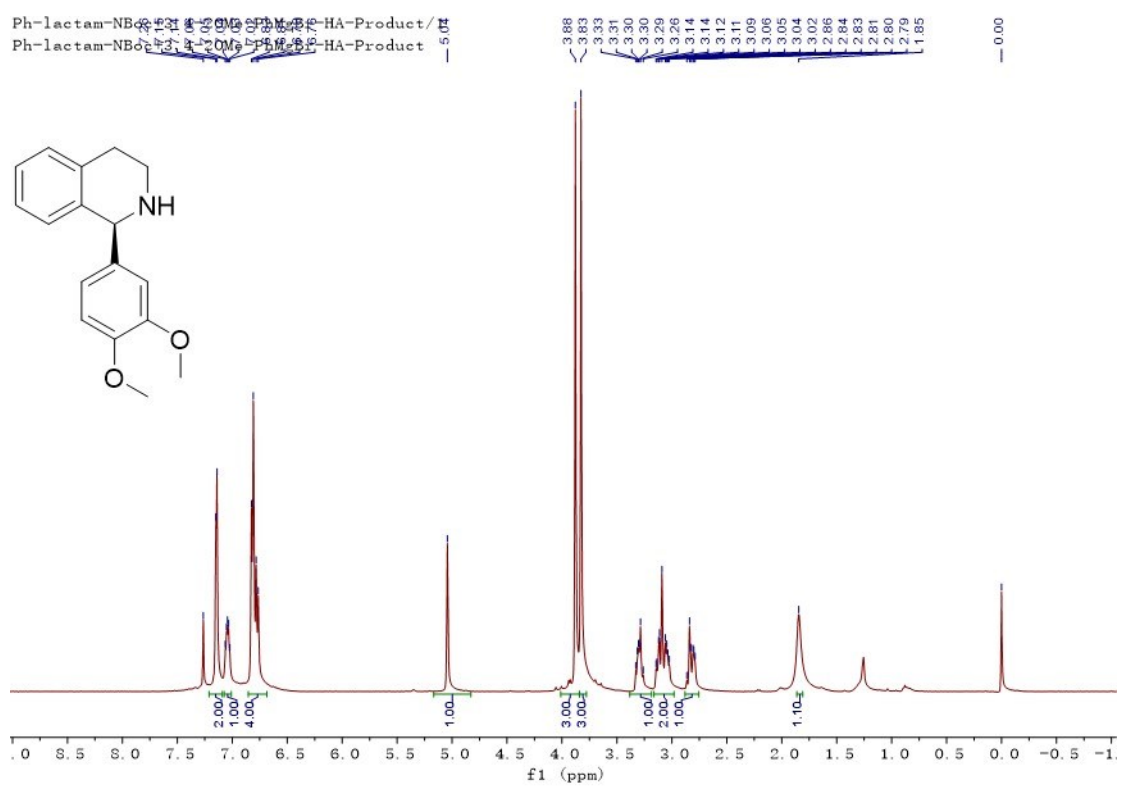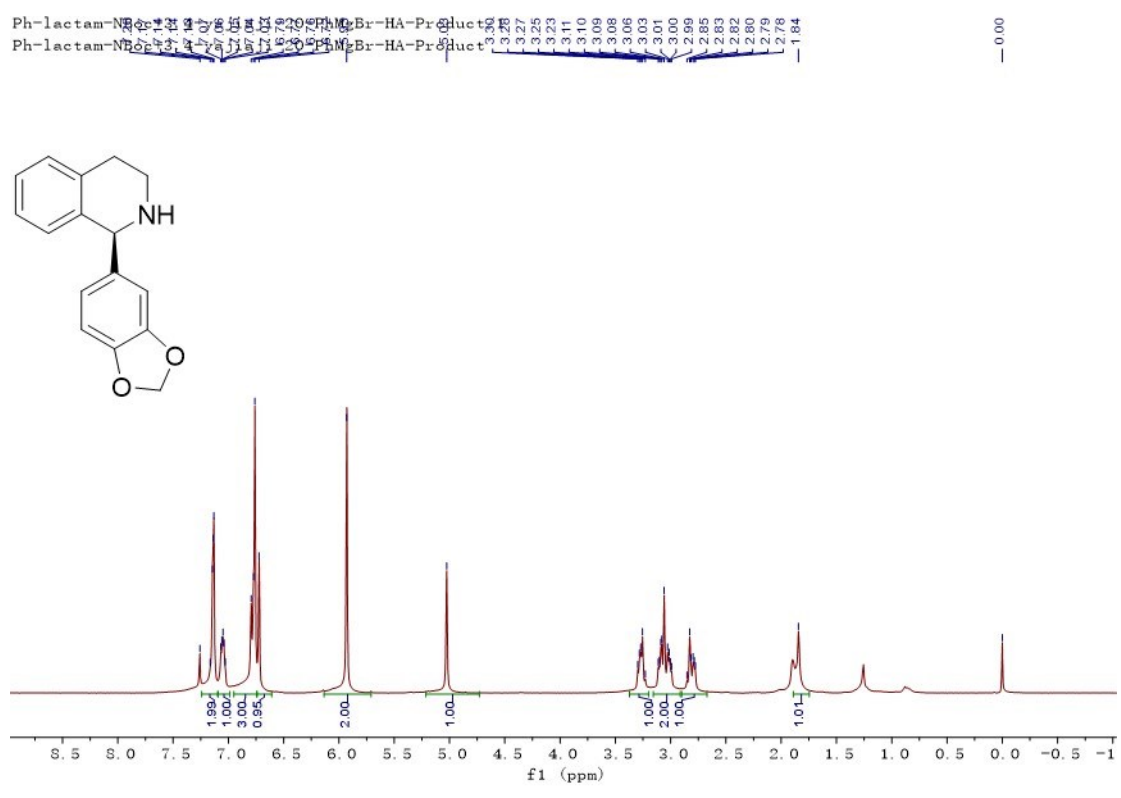



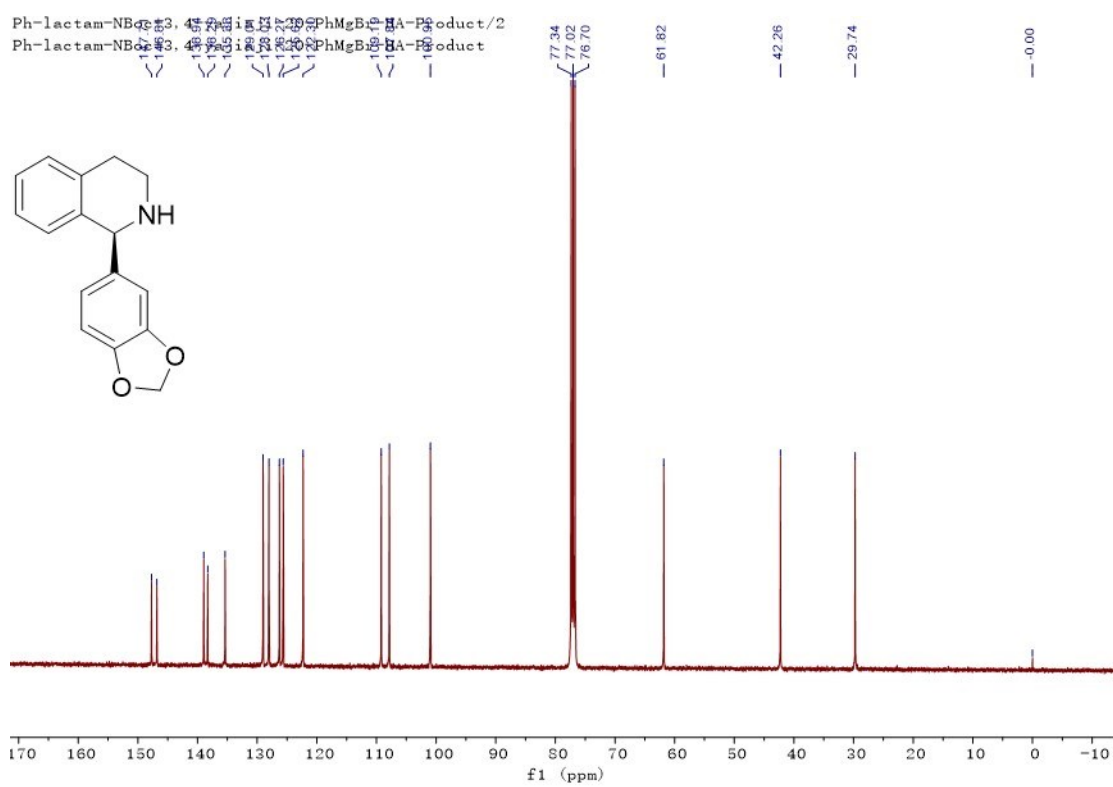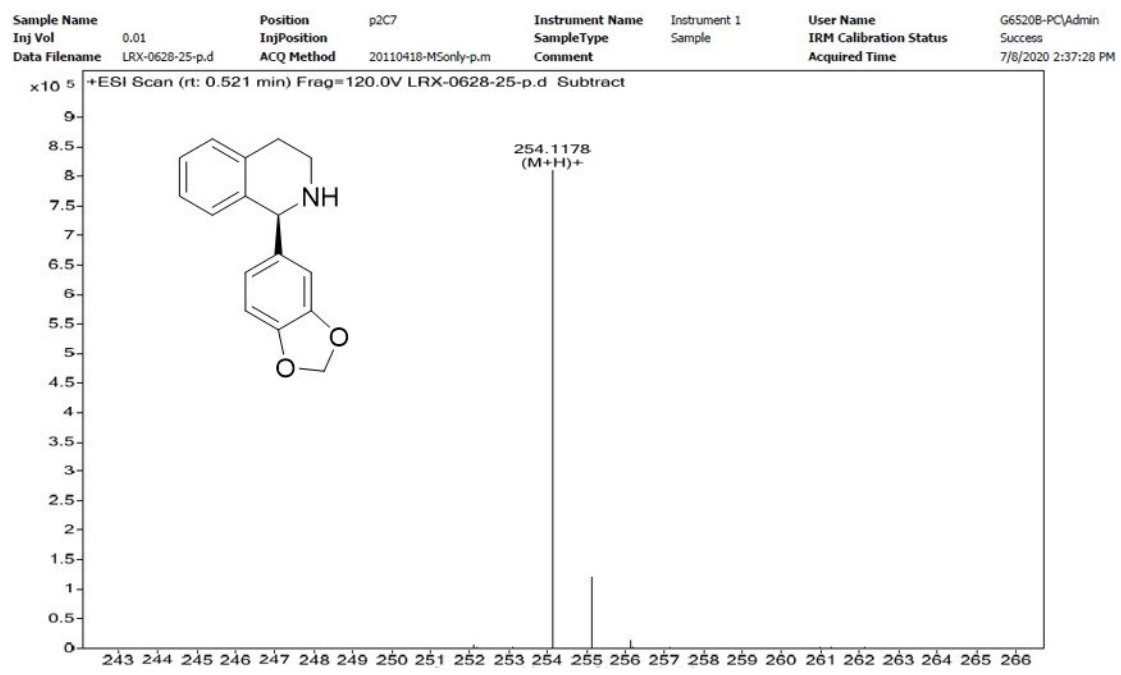

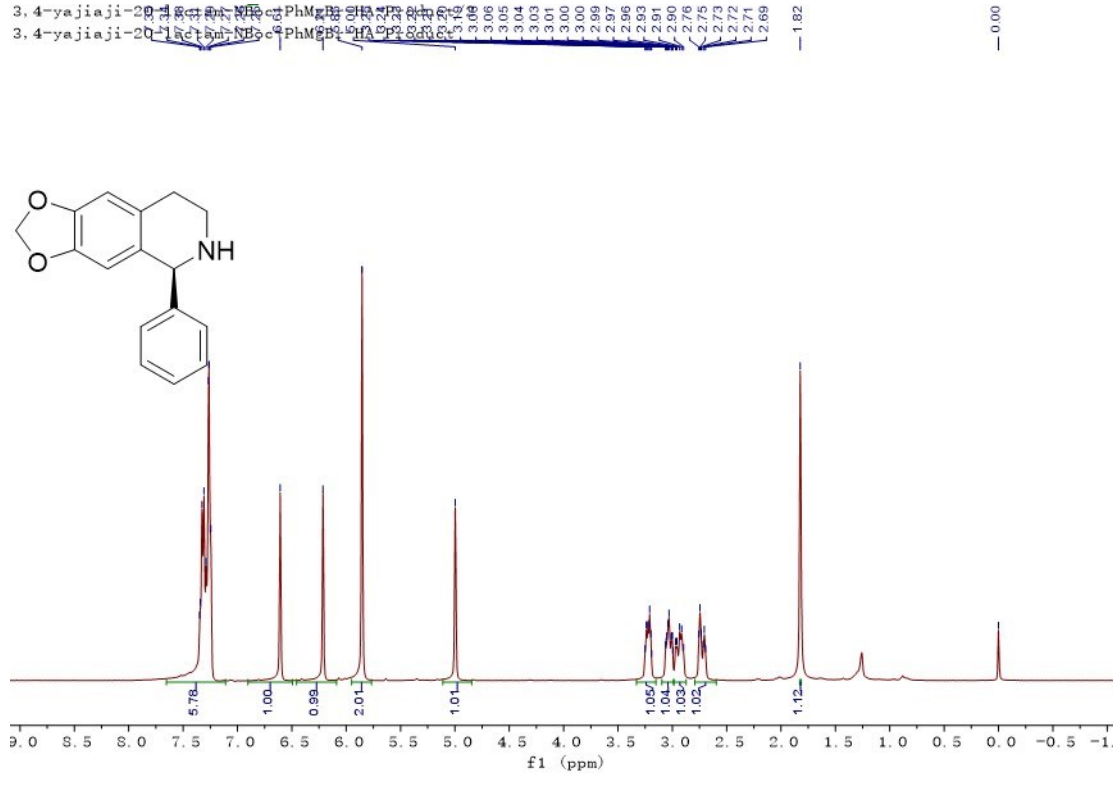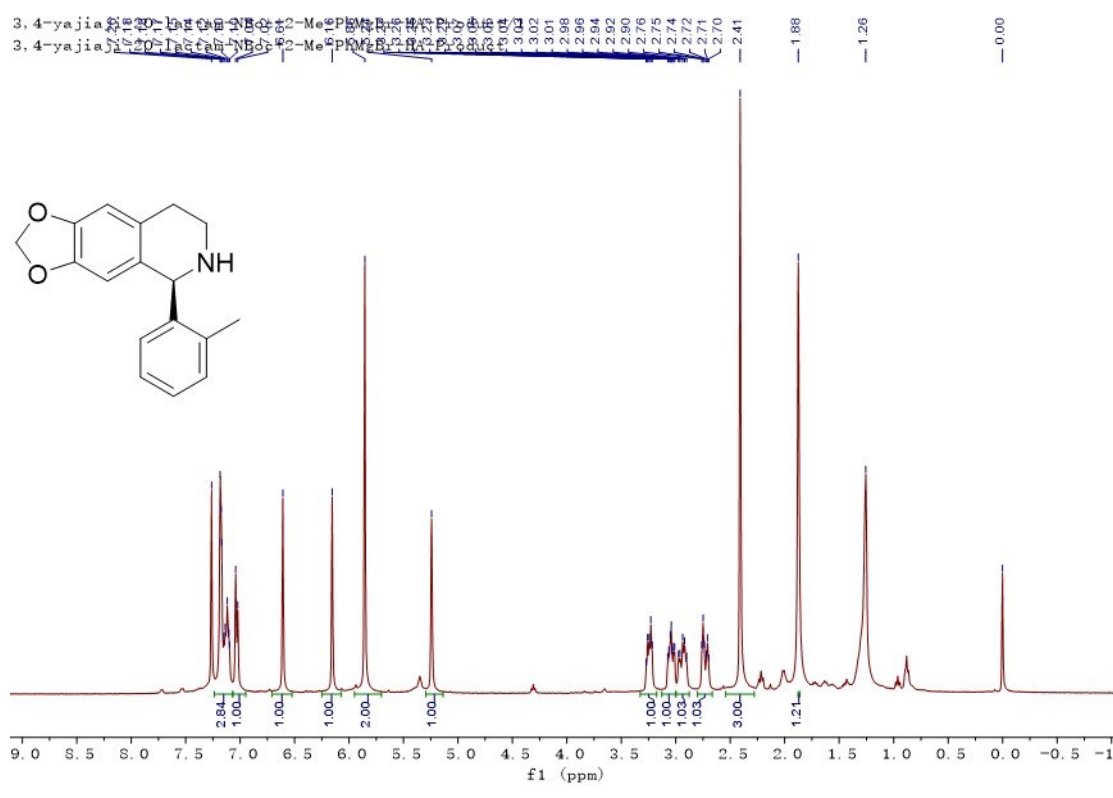

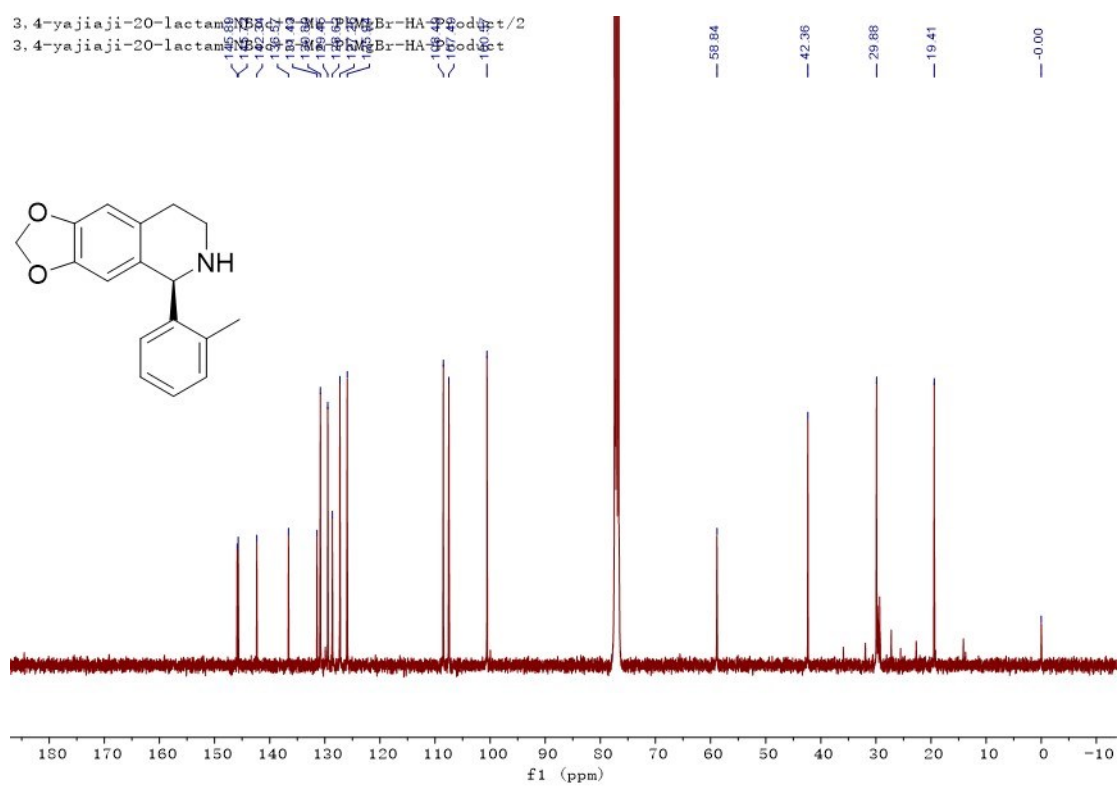

|               |                 |             |                     |                 |              |                        |                     |
|---------------|-----------------|-------------|---------------------|-----------------|--------------|------------------------|---------------------|
| Sample Name   | 0.01            | Position    | p2C3                | Instrument Name | Instrument 1 | User Name              | G6520B-PC\Admin     |
| Inj Vol       |                 | InjPosition |                     | SampleType      | Sample       | IRM Calibration Status | Success             |
| Data Filename | LRX-0628-21-p.d | ACQ Method  | 20110418-M5only-p.m | Comment         |              | Acquired Time          | 7/8/2020 2:29:18 PM |

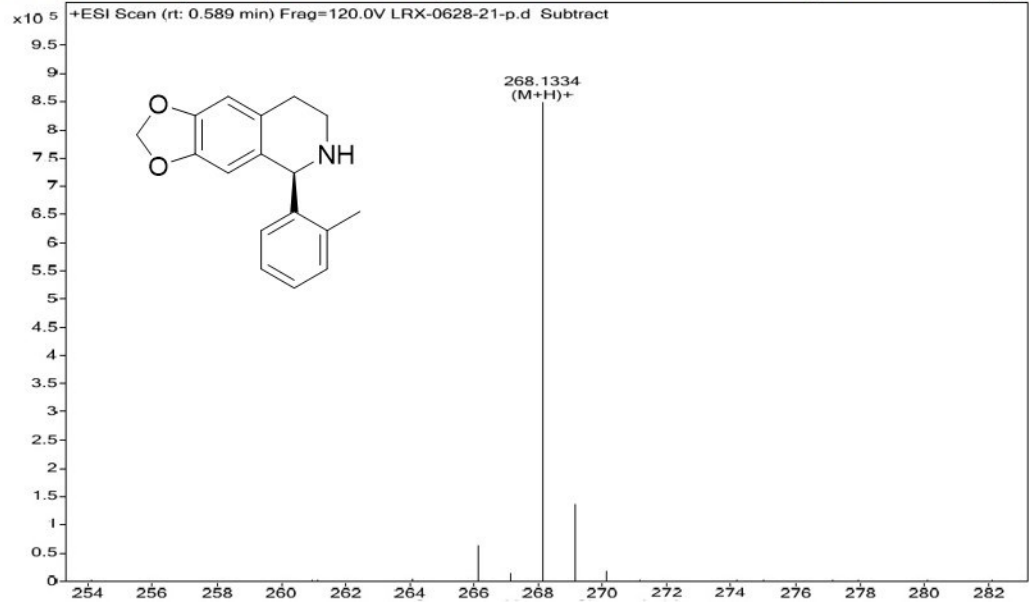



|               |                 |             |                     |                 |              |                        |                     |
|---------------|-----------------|-------------|---------------------|-----------------|--------------|------------------------|---------------------|
| Sample Name   | 0.01            | Position    | p2C2                | Instrument Name | Instrument 1 | User Name              | G65208-PC\Admin     |
| Inj Vol       | LRX-0628-20-p.d | InjPosition |                     | SampleType      | Sample       | IRM Calibration Status | Success             |
| Data Filename |                 | ACQ Method  | 20110418-M5only-p.m | Comment         |              | Acquired Time          | 7/8/2020 2:26:34 PM |

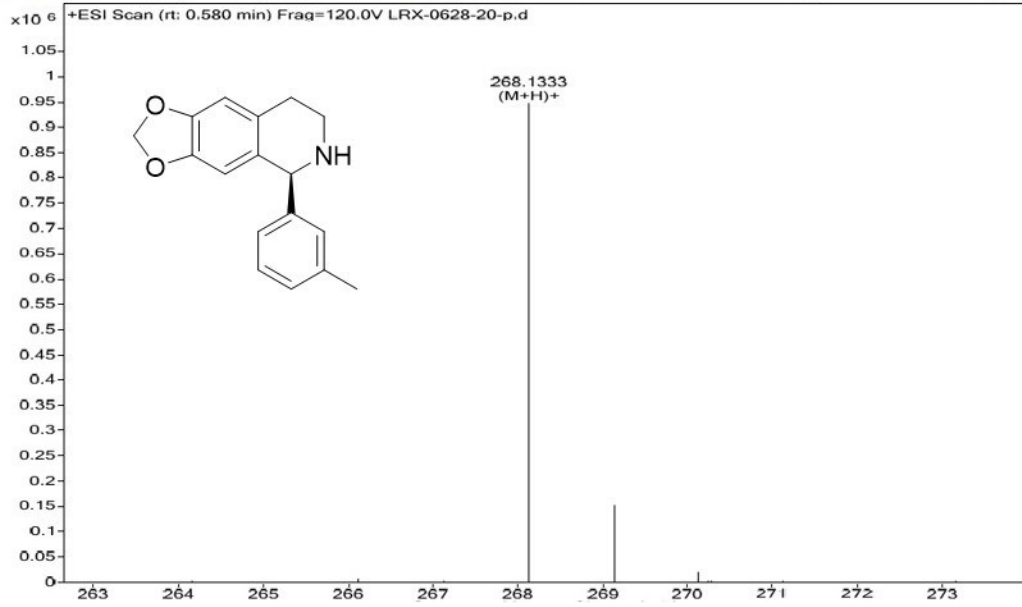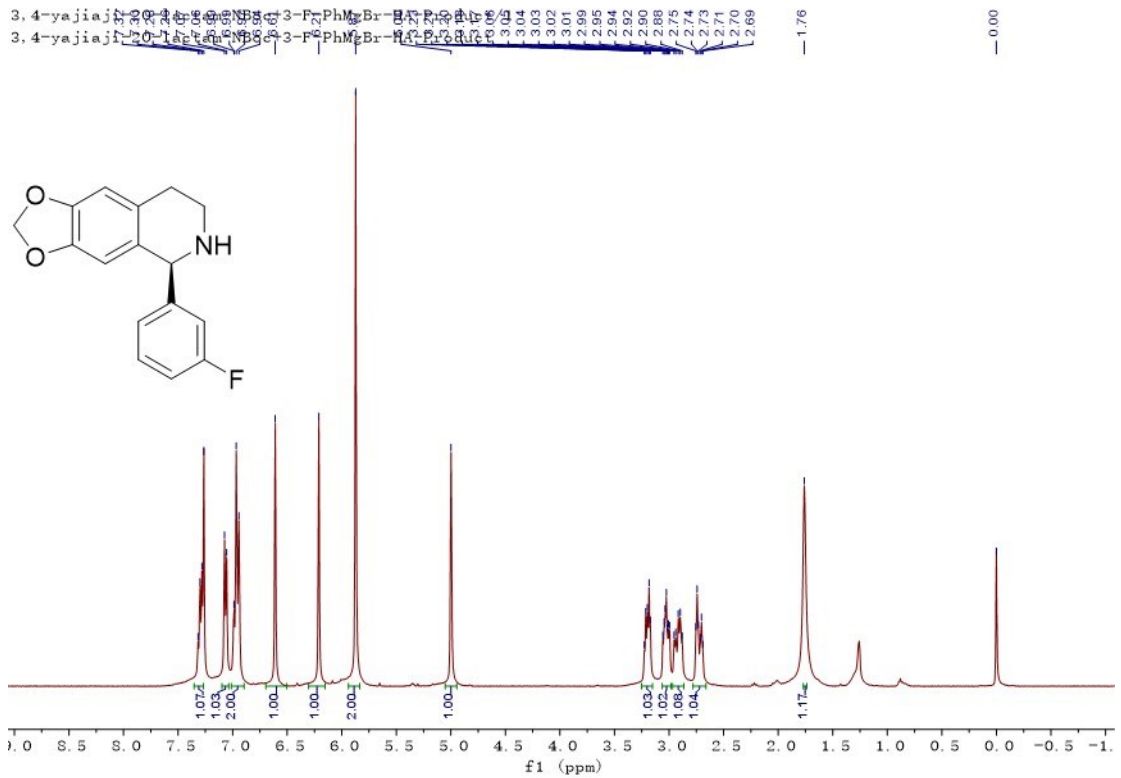

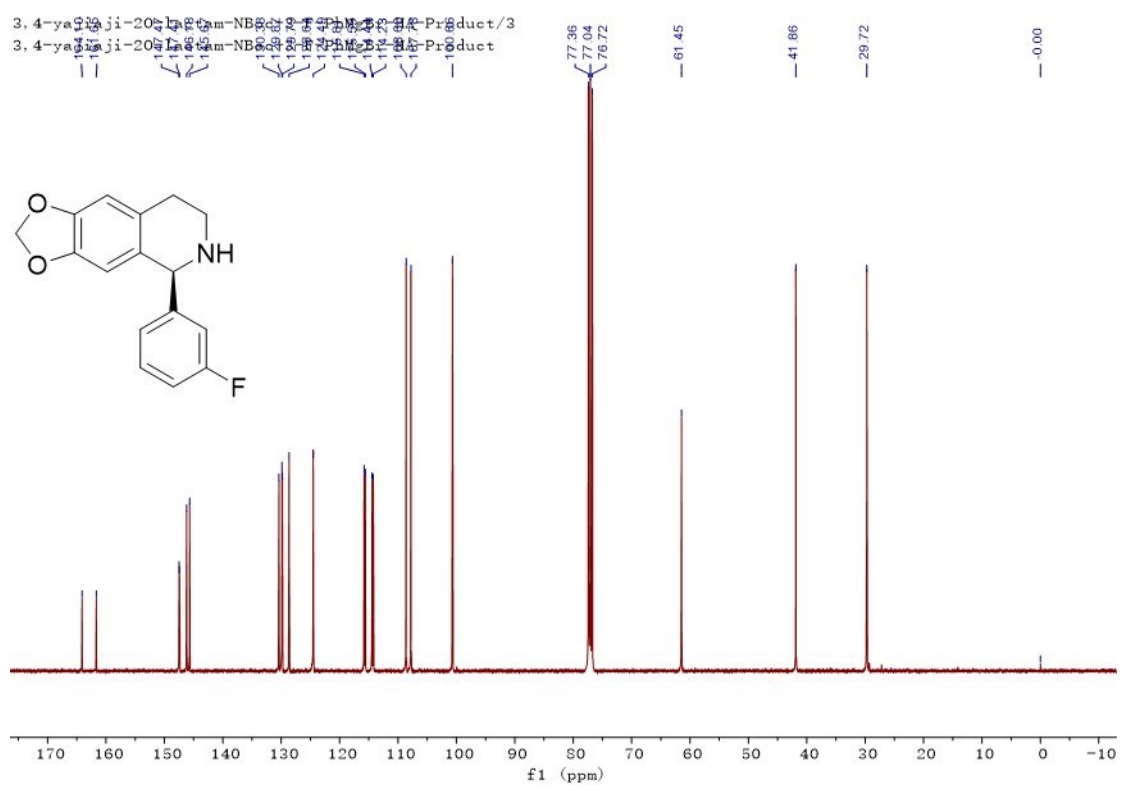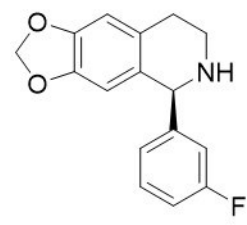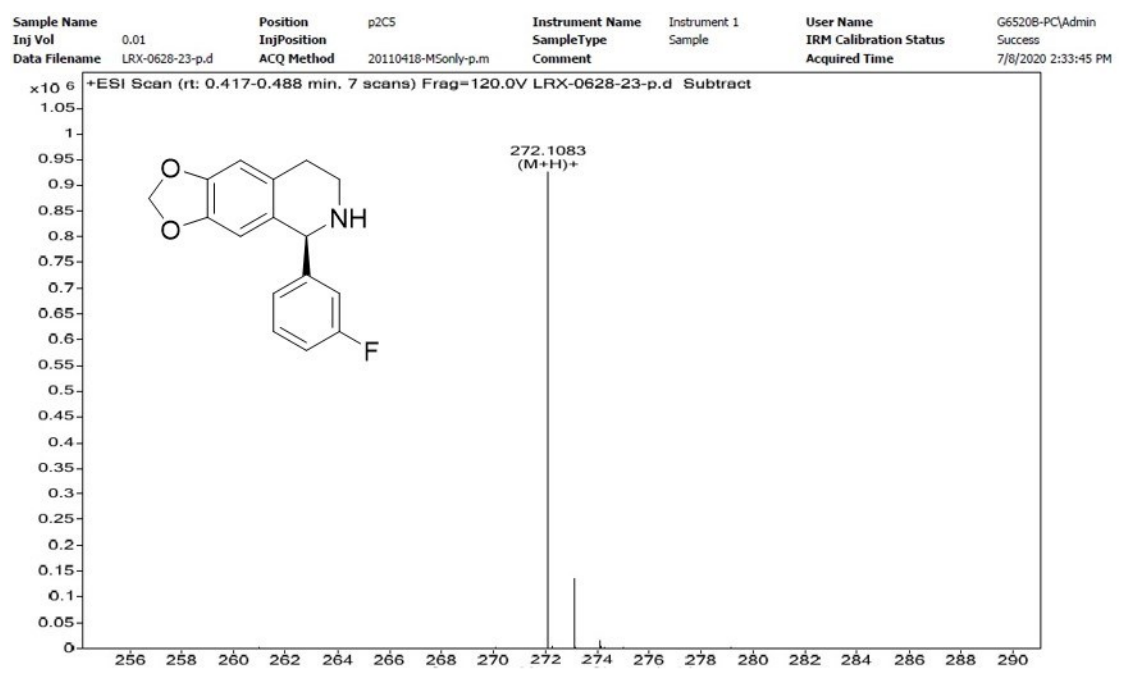



|               |                 |             |                     |                 |              |                        |                     |
|---------------|-----------------|-------------|---------------------|-----------------|--------------|------------------------|---------------------|
| Sample Name   | 0.01            | Position    | p2C6                | Instrument Name | Instrument 1 | User Name              | G65208-PC\Admin     |
| Inj Vol       | 0.01            | InjPosition |                     | SampleType      | Sample       | IRM Calibration Status | Success             |
| Data Filename | LRX-0628-24-p.d | ACQ Method  | 20110418-M5only-p.m | Comment         |              | Acquired Time          | 7/8/2020 2:35:40 PM |

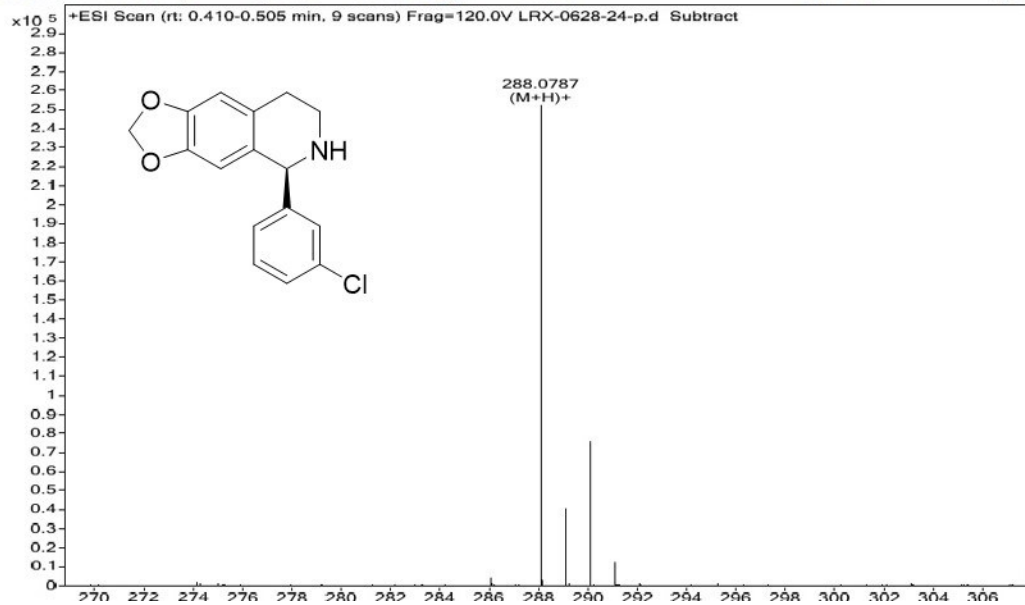

3.4-yajiaji-20-lactam-NBoc-p-MePhMeCl-HA-Product  
 3.4-yajiaji-20-lactam-NBoc-p-MePhMeCl-HA-Product

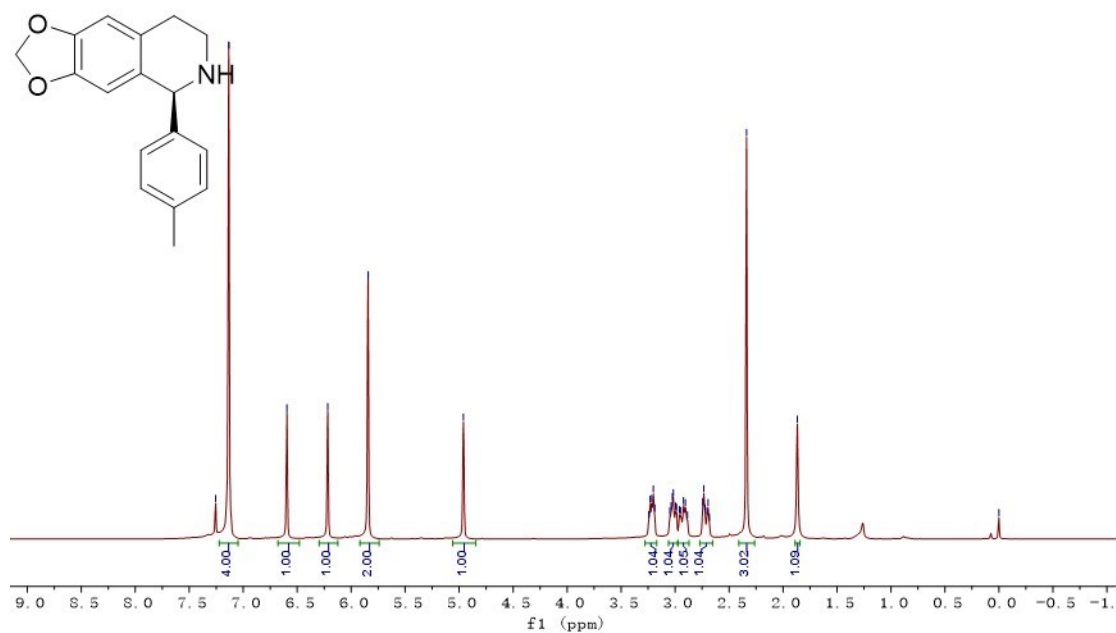



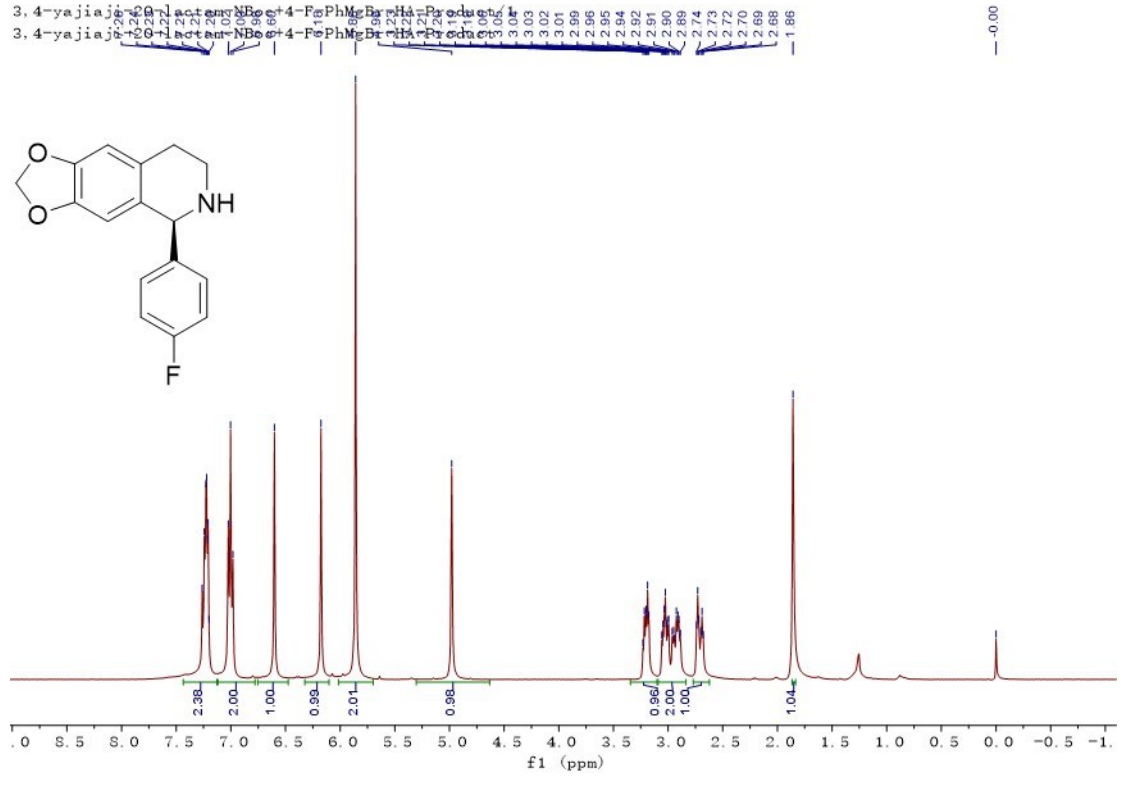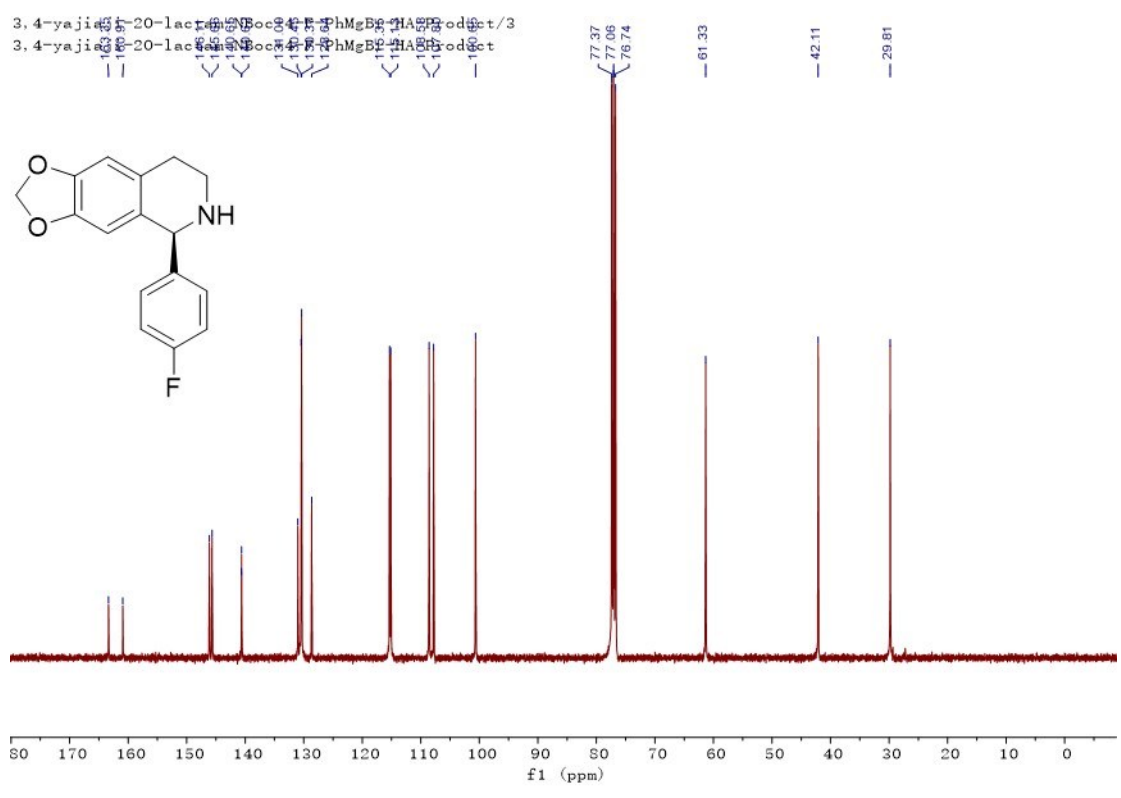



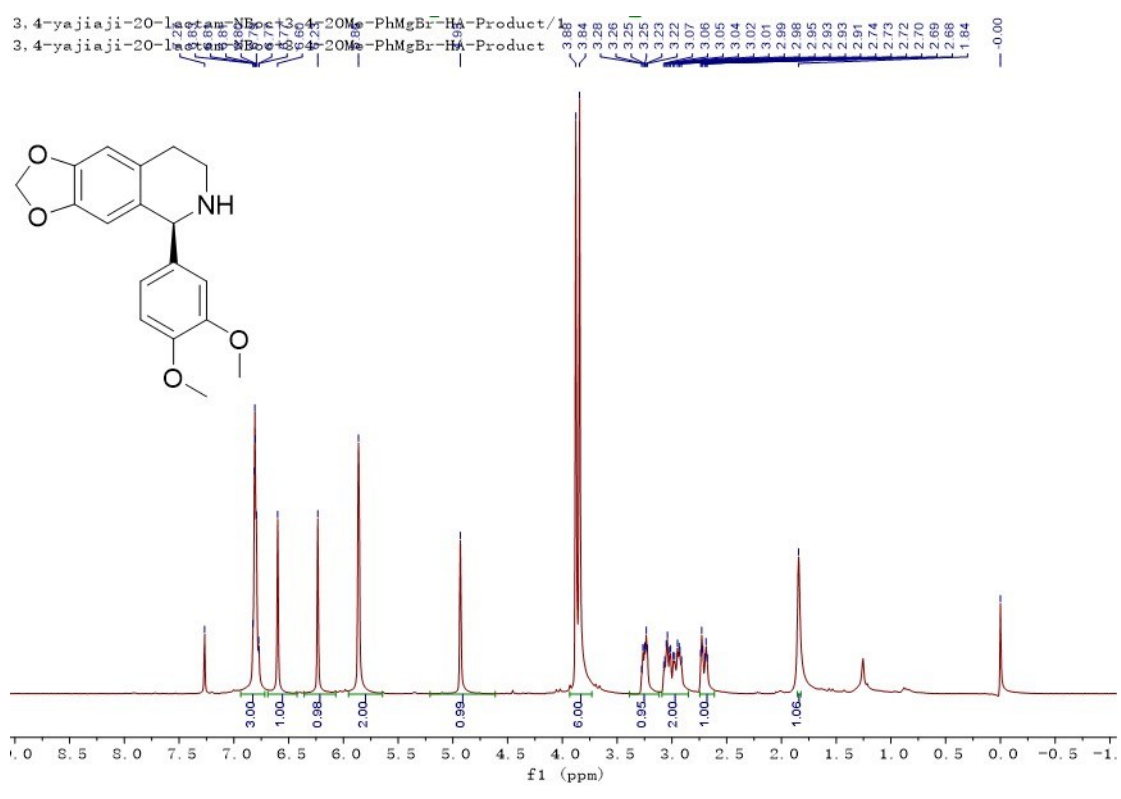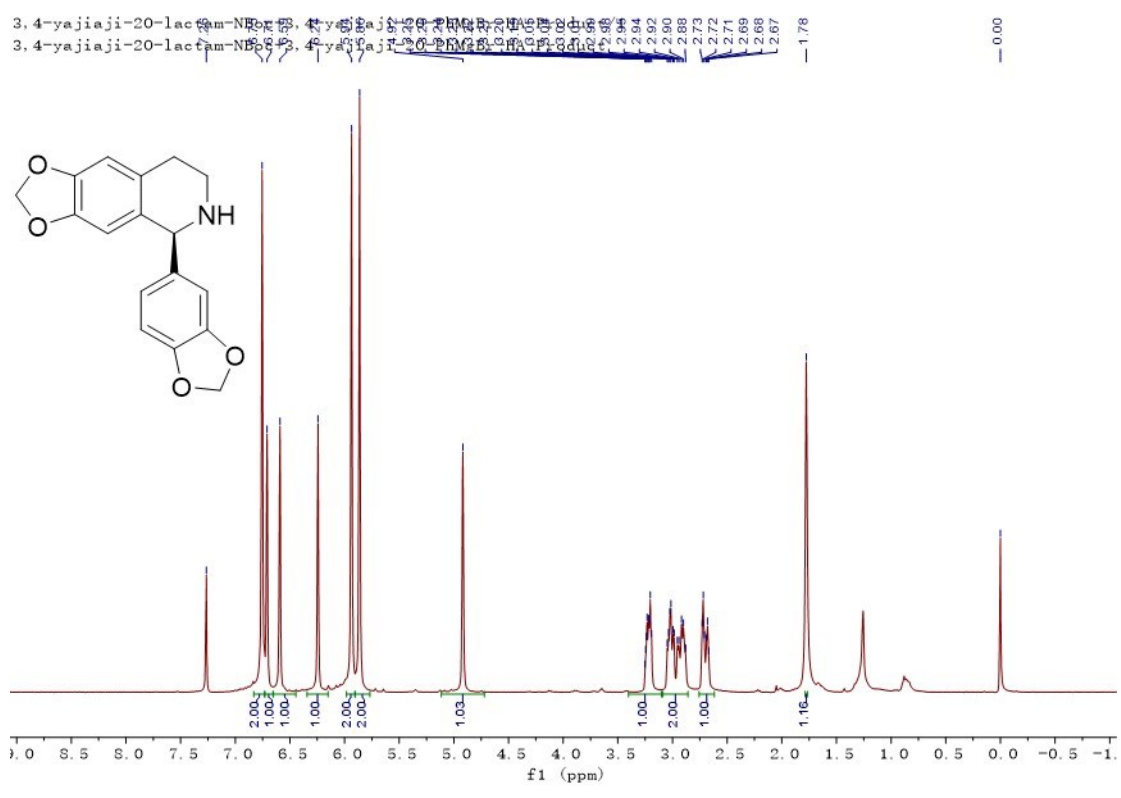

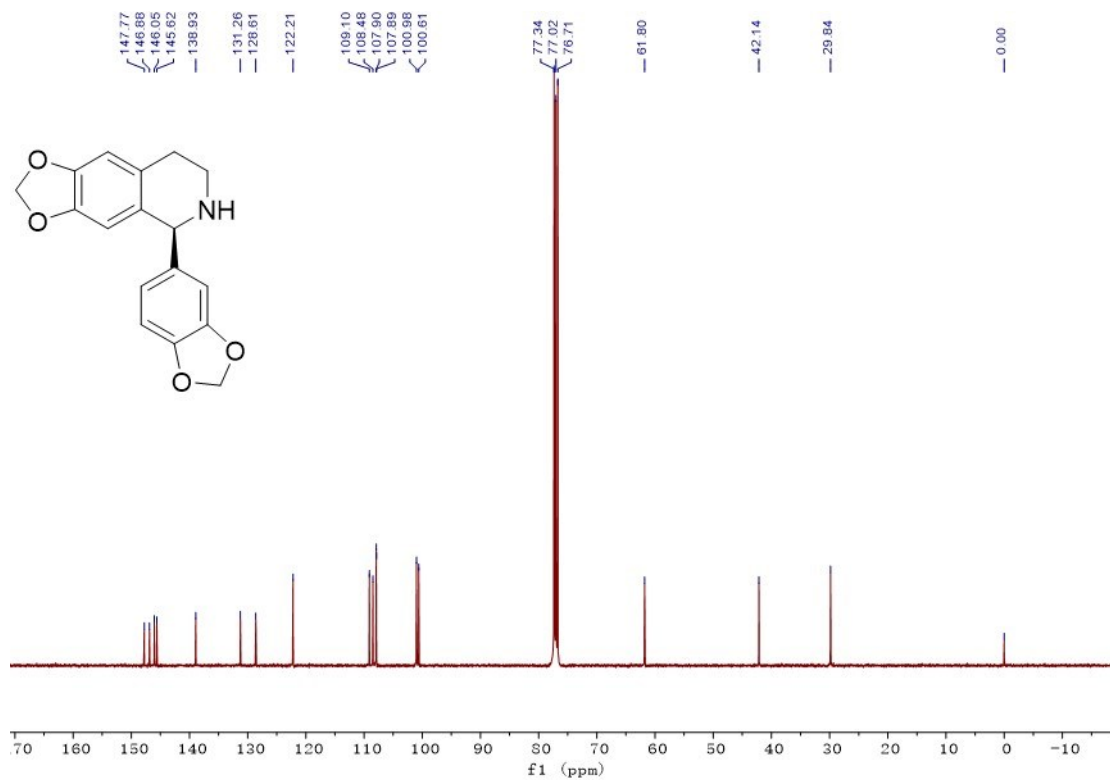

| Sample Name        | Position            | Instrument Name | User Name              |
|--------------------|---------------------|-----------------|------------------------|
| Inj Vol            | p1C3                | Instrument 1    | G6520B-PC\Admin        |
| Data Filename      | ACQ Method          | Sample          | IRM Calibration Status |
| LRX-20201102-2-p.d | 20110418-M5only-p.m |                 | Success                |
|                    |                     |                 | Acquired Time          |
|                    |                     |                 | 11/5/2020 1:44:07 PM   |

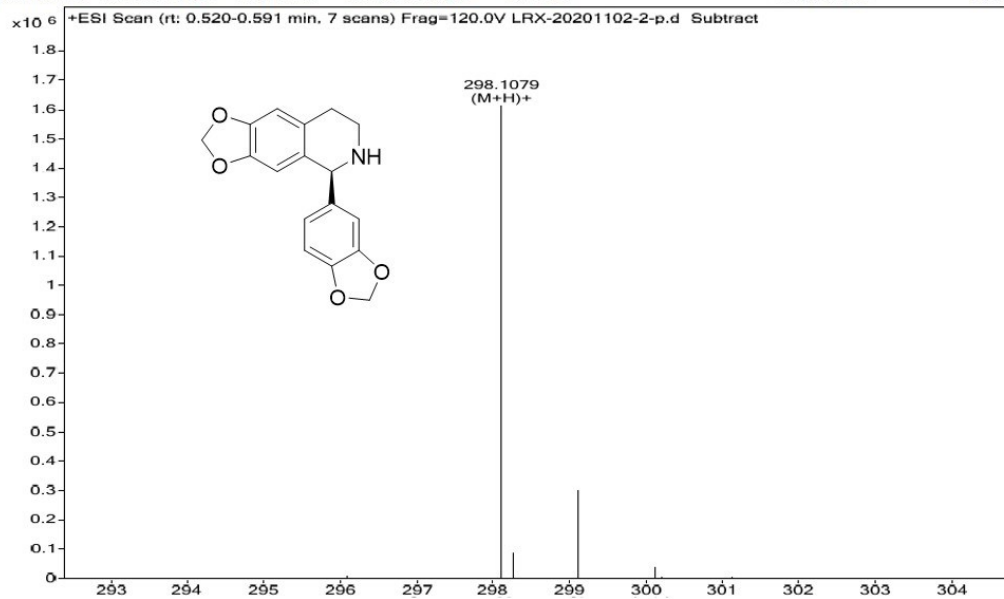

3,4-2OMe-lactam-NB-5-Ph-1-MgBr-HA-Product/2  
 3,4-2OMe-lactam-NB-5-Ph-1-MgBr-HA-Product

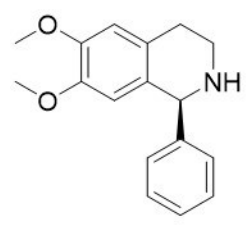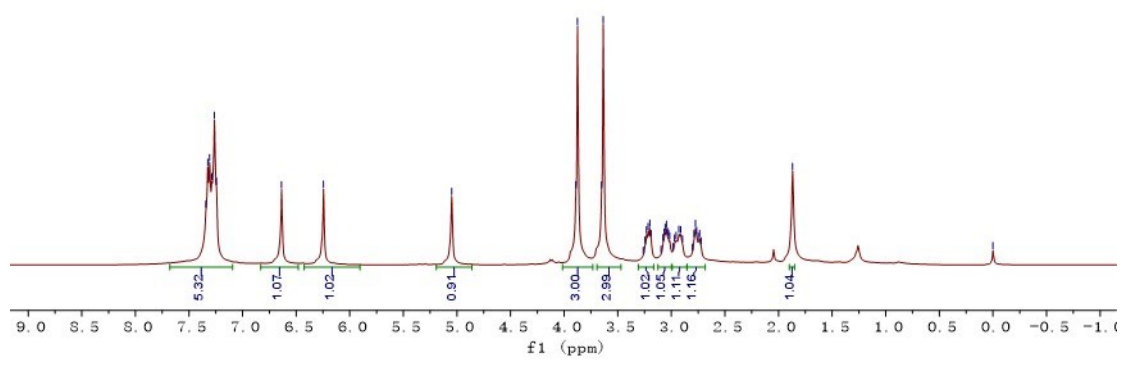

3,4-2OMe-lactam-NB-5-Ph-1-MgBr-HA-Product/1  
 3,4-2OMe-lactam-NB-5-Ph-1-MgBr-HA-Product

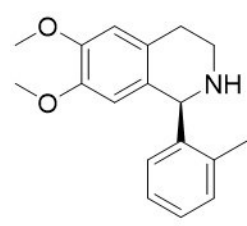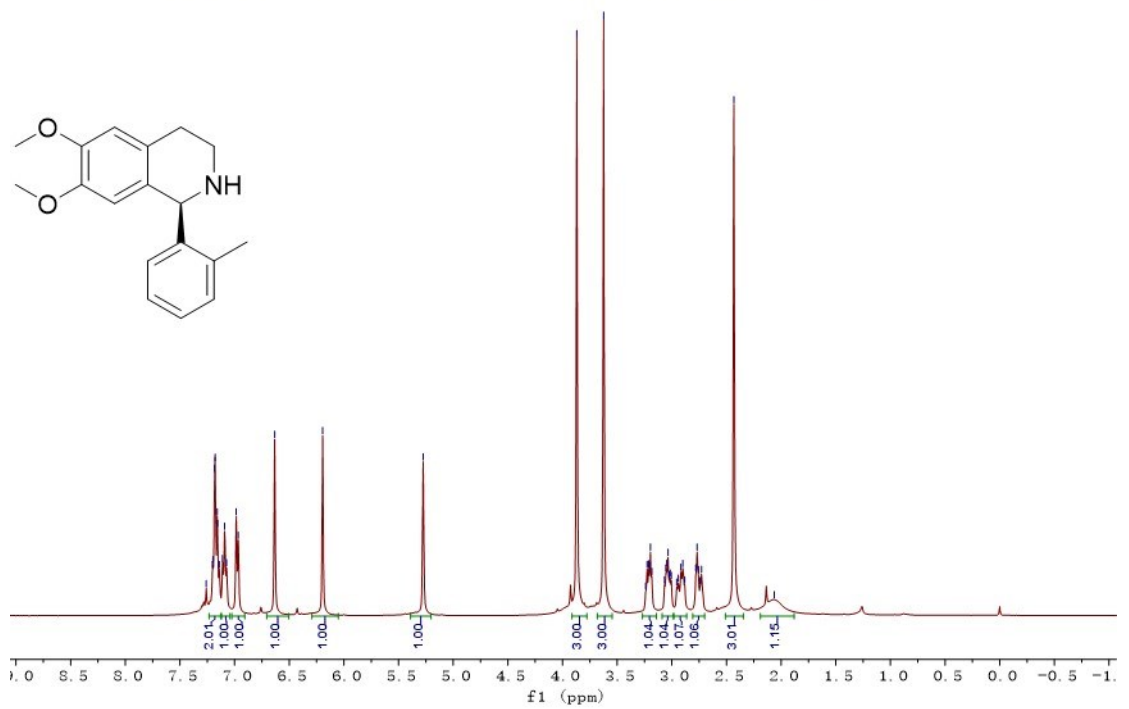

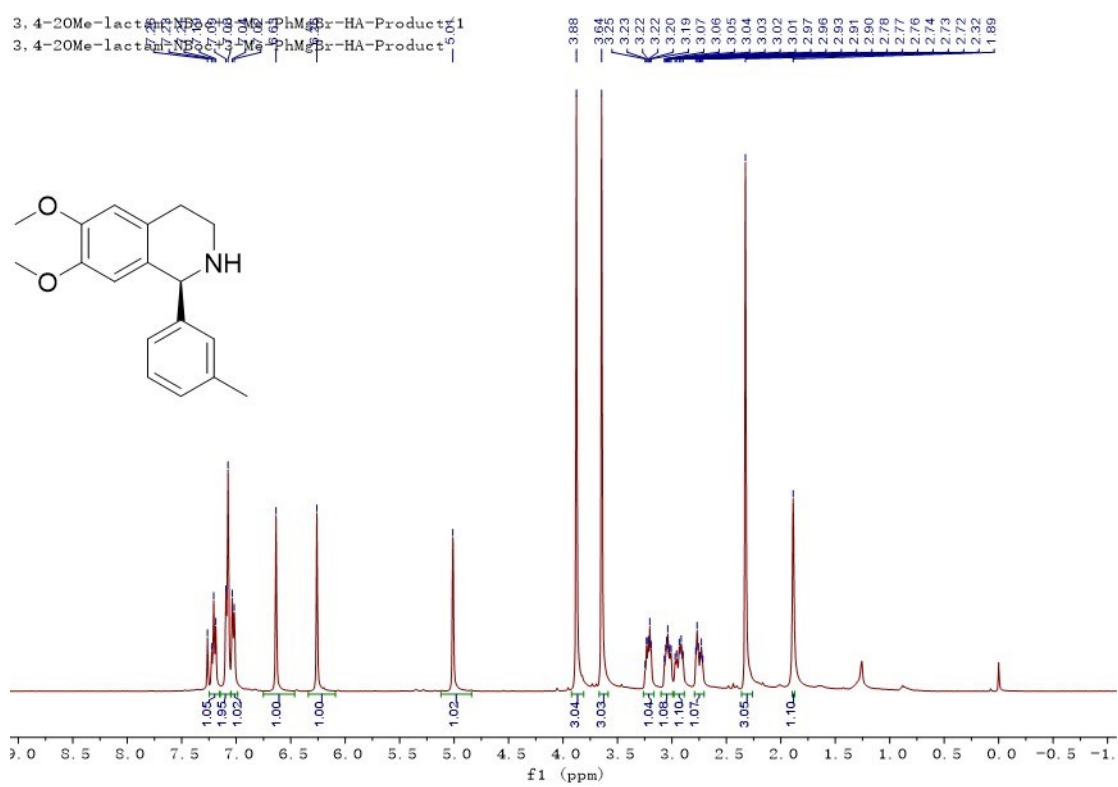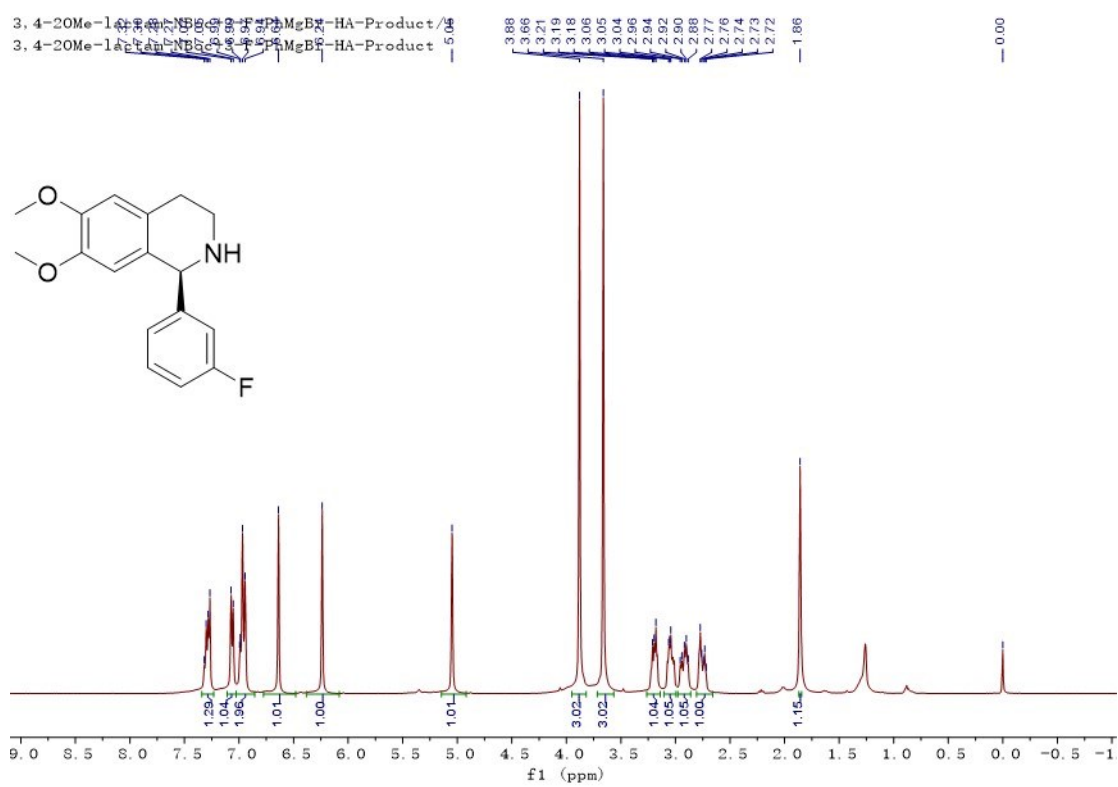

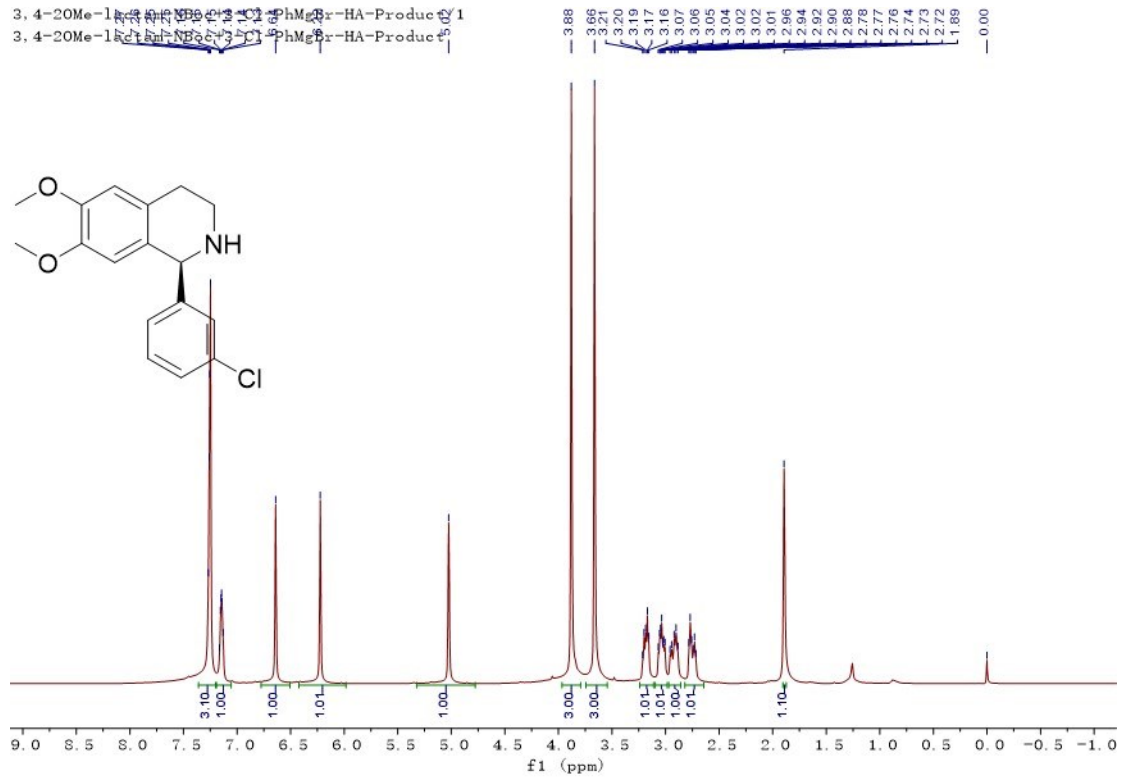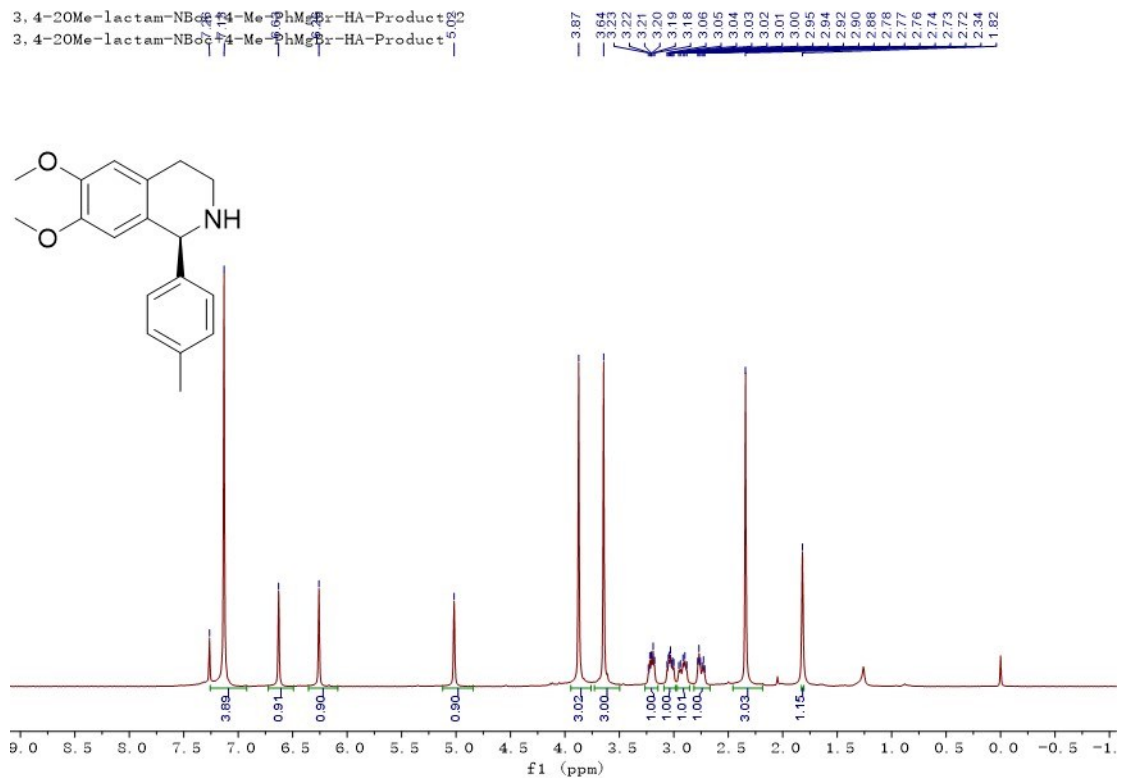

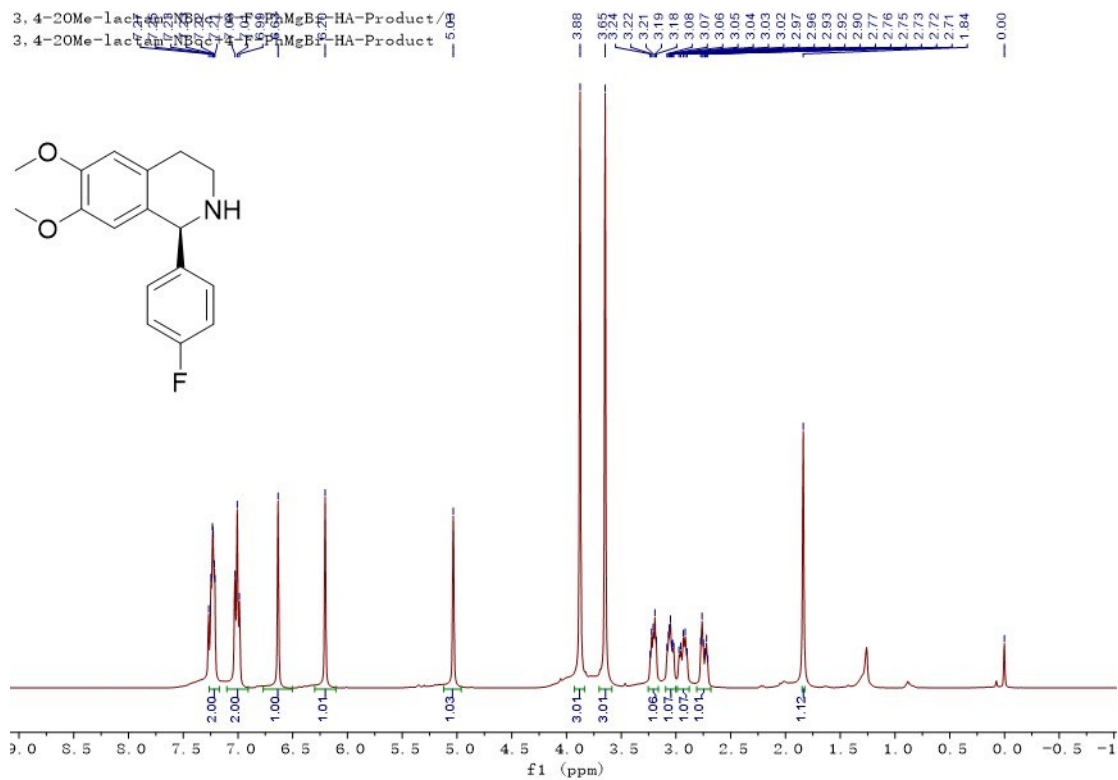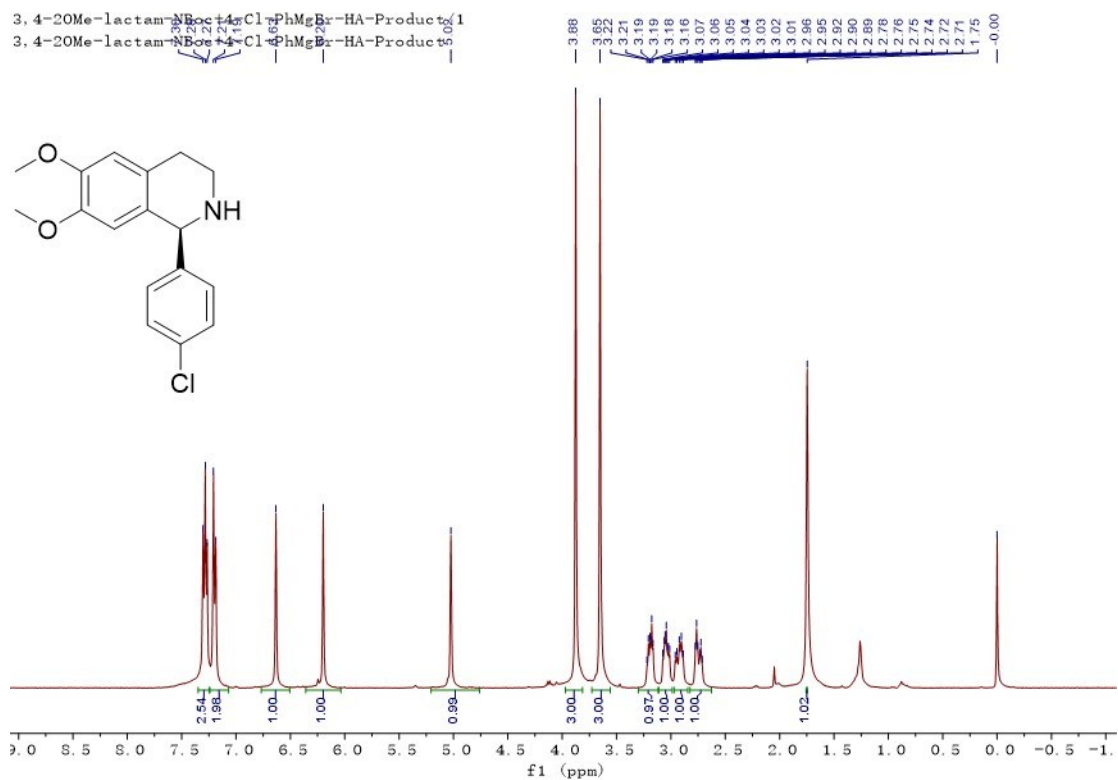



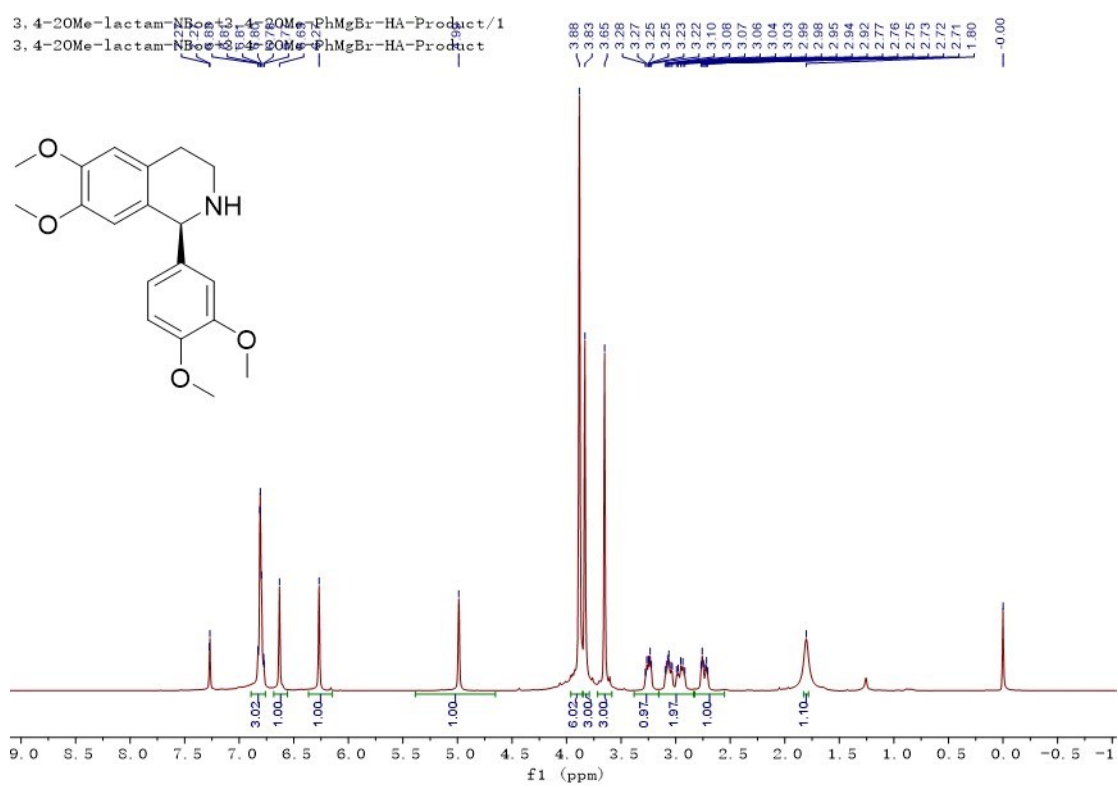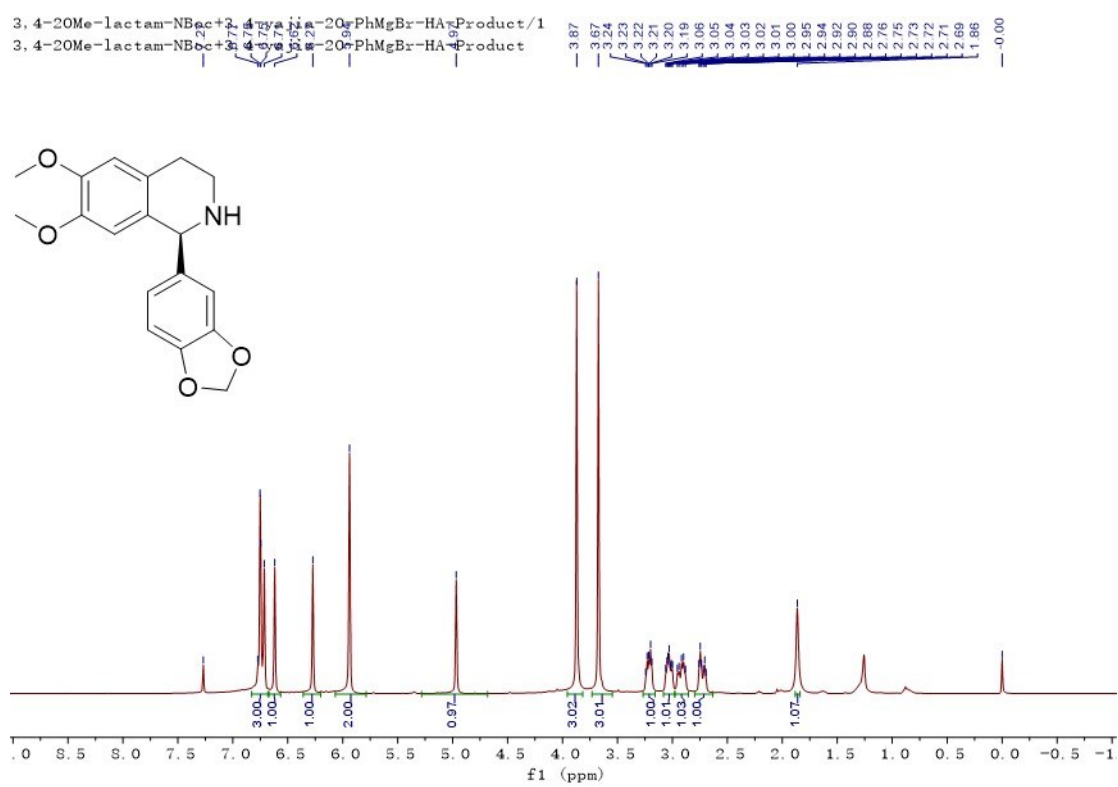

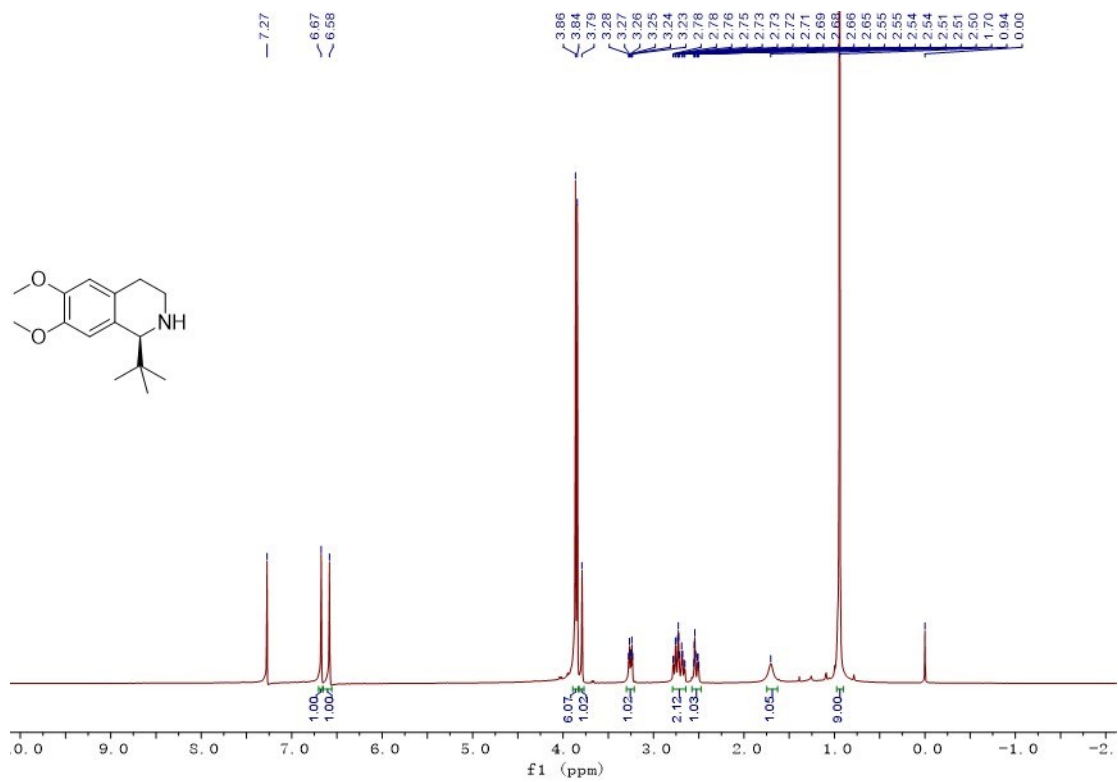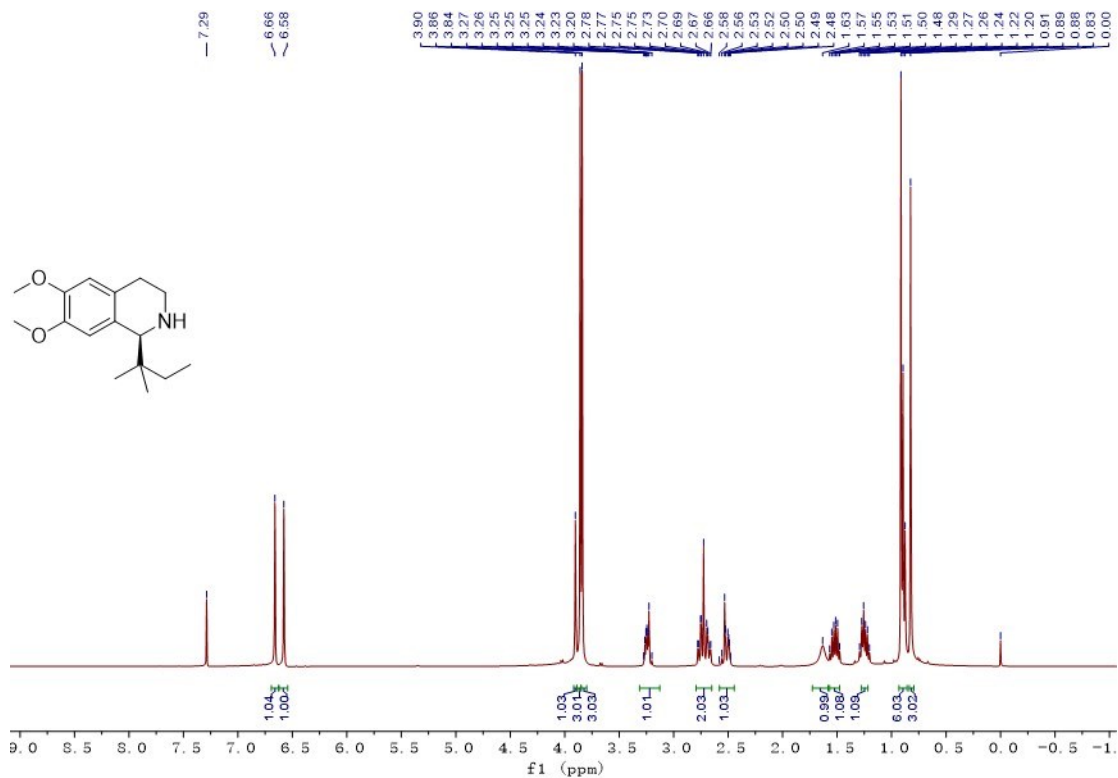

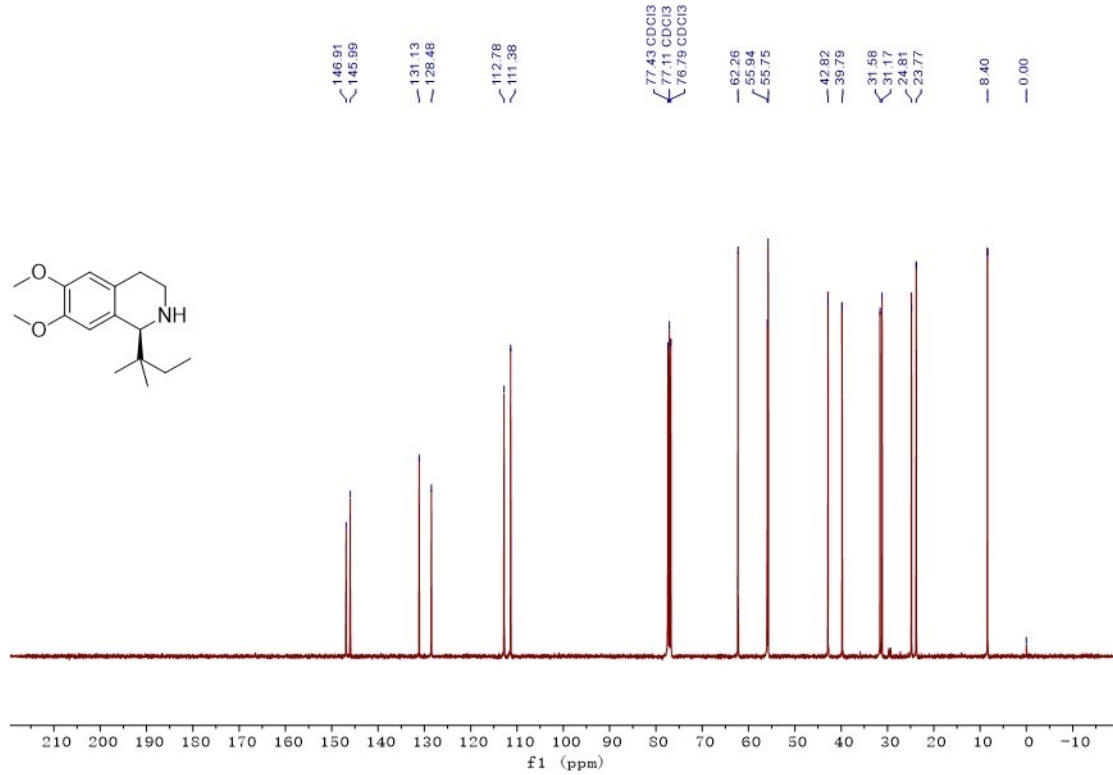

### Display Report

| Analysis Info |                                 | Acquisition Date       |             |
|---------------|---------------------------------|------------------------|-------------|
| Analysis Name | D:\Data\2020\12\10\20201209-3.d | 12/10/2020 10:56:35 AM |             |
| Method        | pos_low-20151116.m              | Operator               | Fan         |
| Sample Name   | niehuifang                      | Instrument             | maXis 10103 |
| Comment       |                                 |                        |             |

| Acquisition Parameter |            |                       |           |                  |           |
|-----------------------|------------|-----------------------|-----------|------------------|-----------|
| Source Type           | ESI        | Ion Polarity          | Positive  | Set Nebulizer    | 0.4 Bar   |
| Focus                 | Not active | Set Capillary         | 4000 V    | Set Dry Heater   | 180 °C    |
| Scan Begin            | 100 m/z    | Set End Plate Offset  | -500 V    | Set Dry Gas      | 4.0 l/min |
| Scan End              | 1100 m/z   | Set Collision Cell RF | 200.0 Vpp | Set Divert Valve | Waste     |

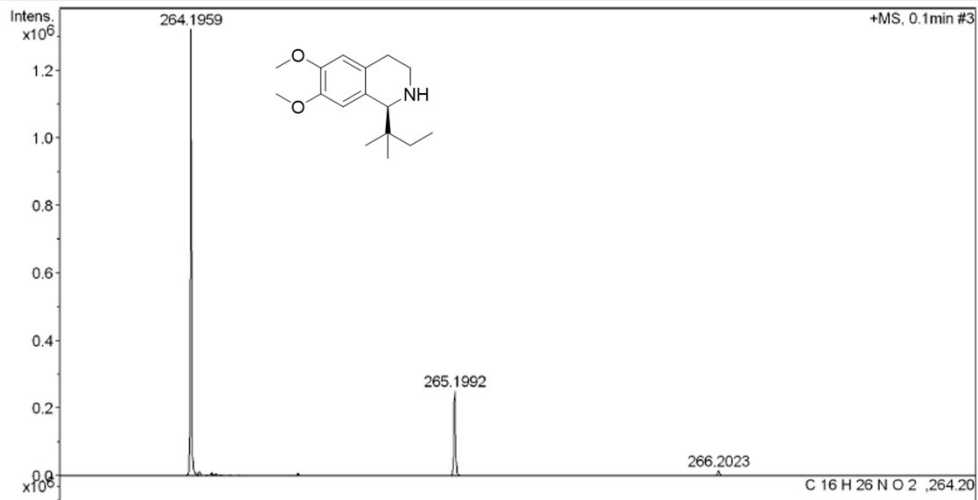

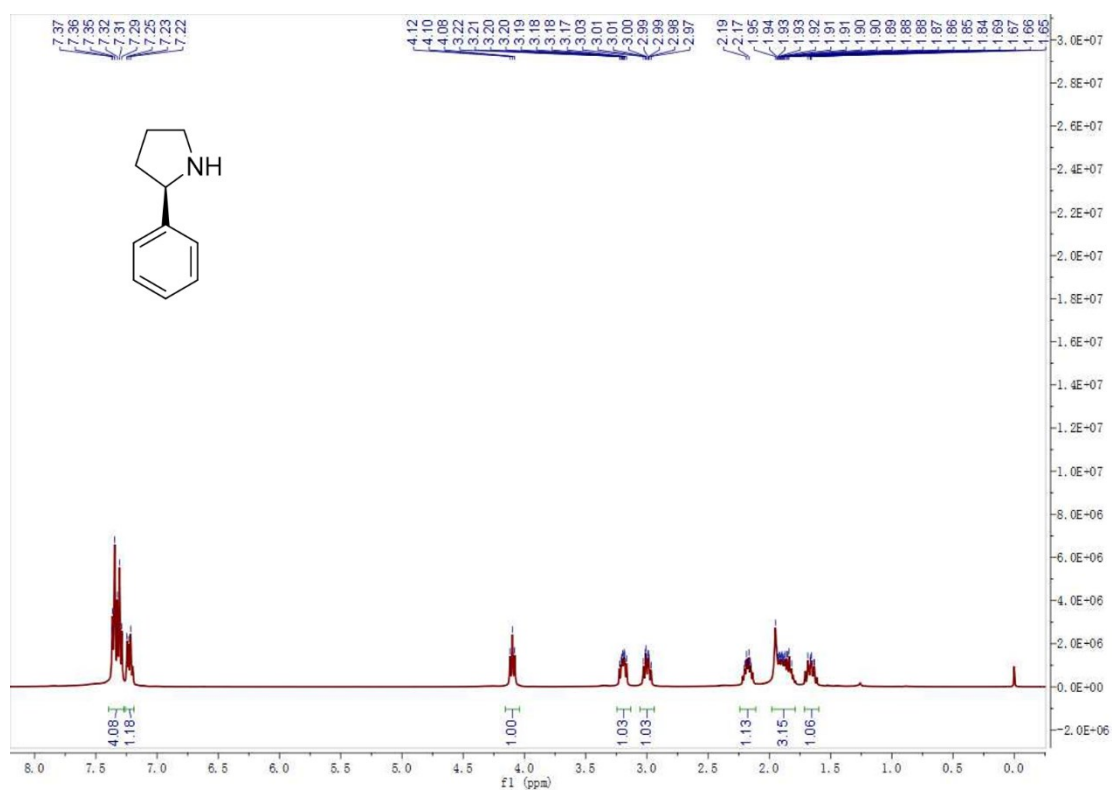

## 5. HPLC spectra

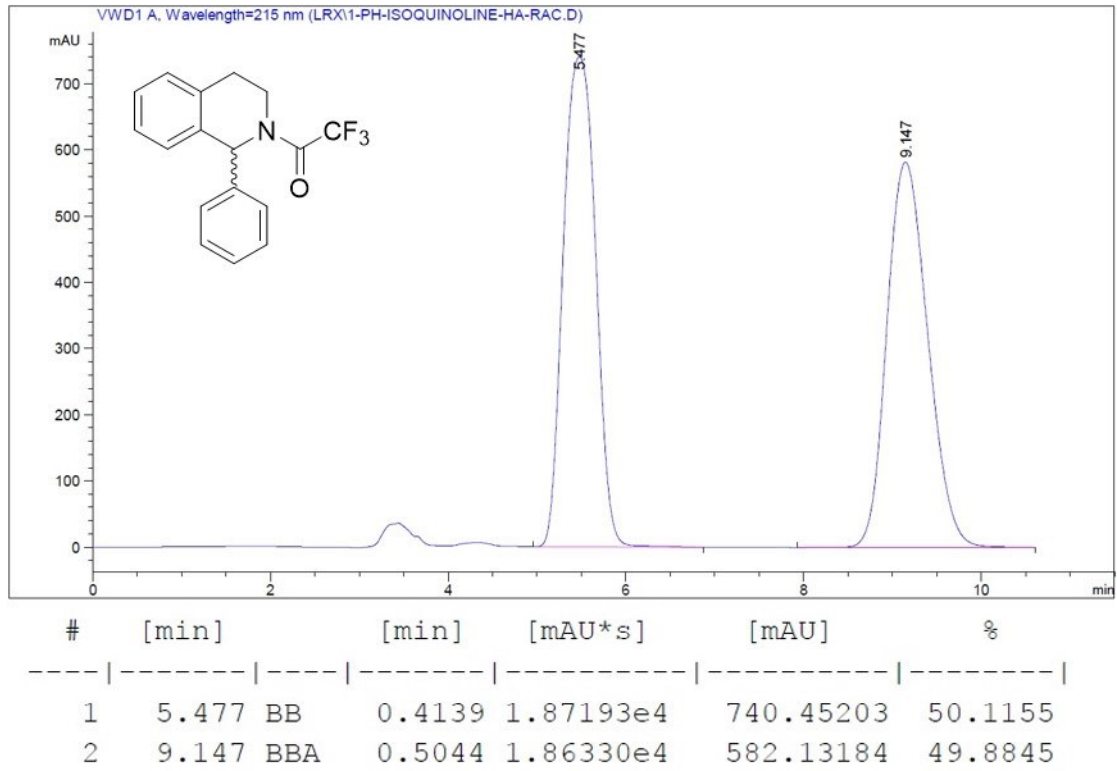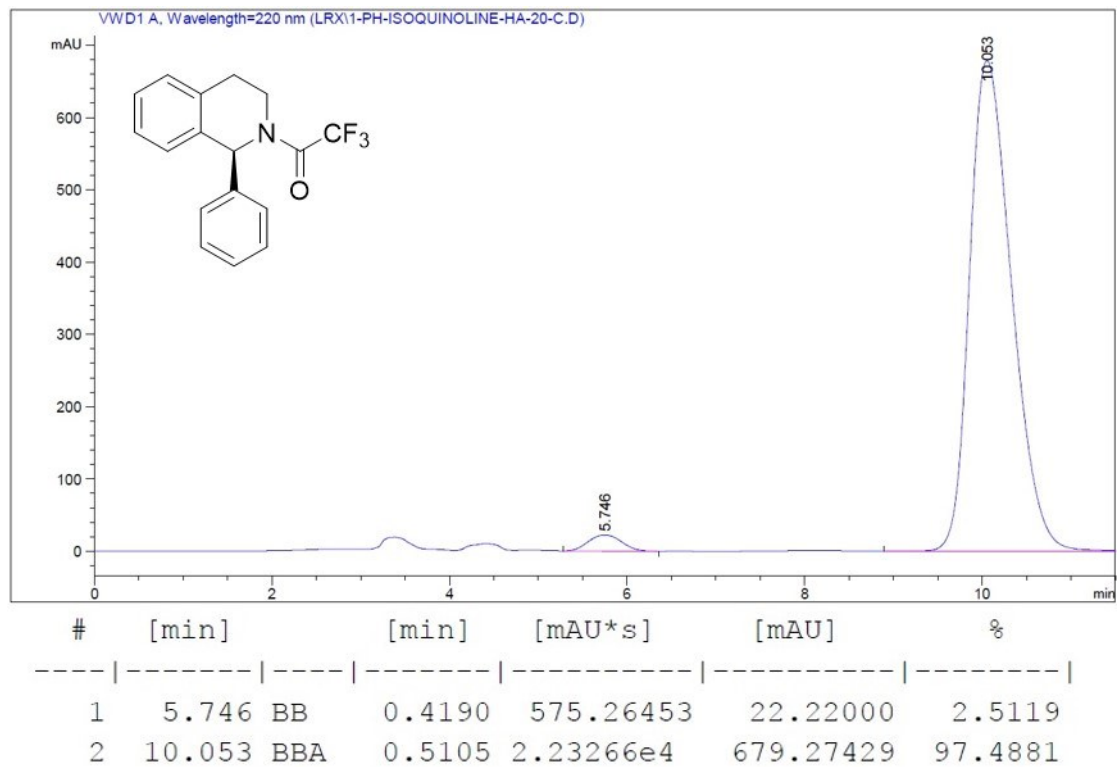

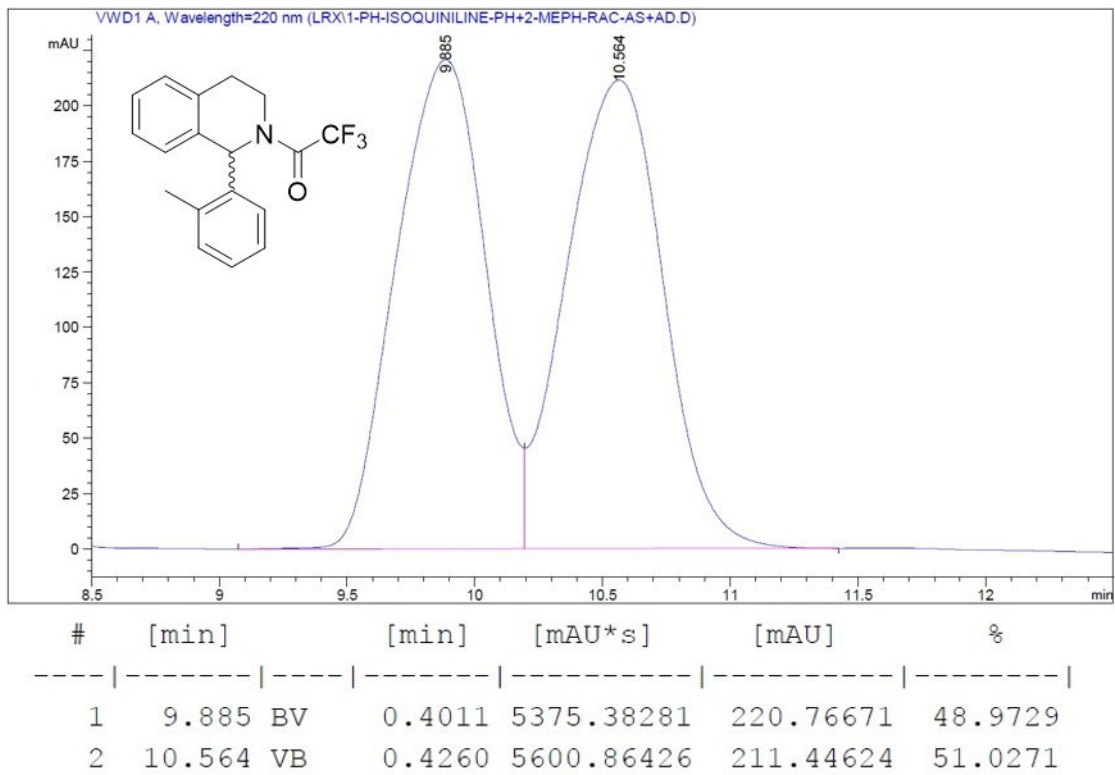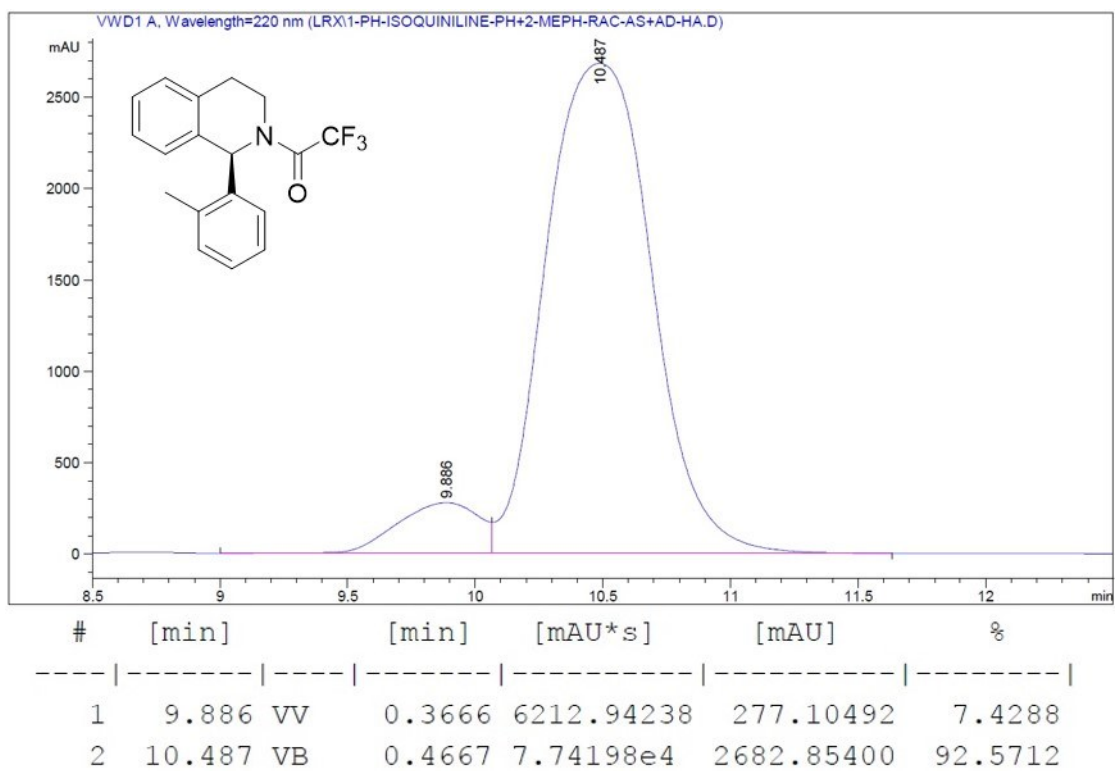

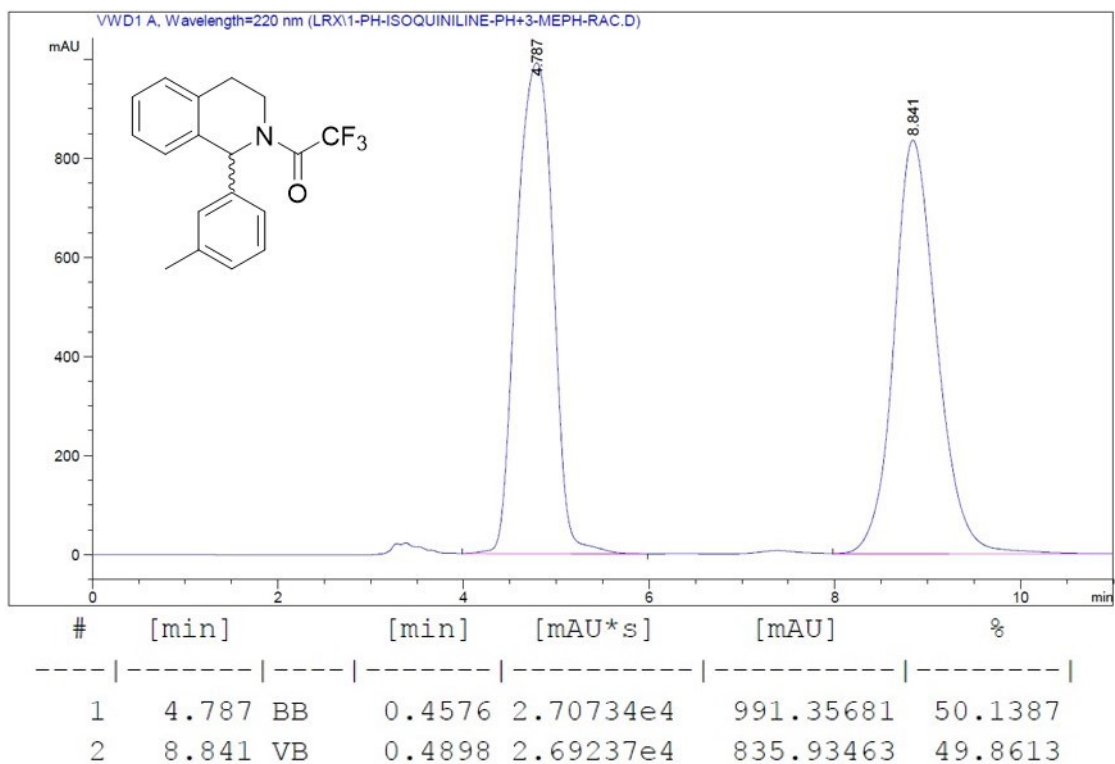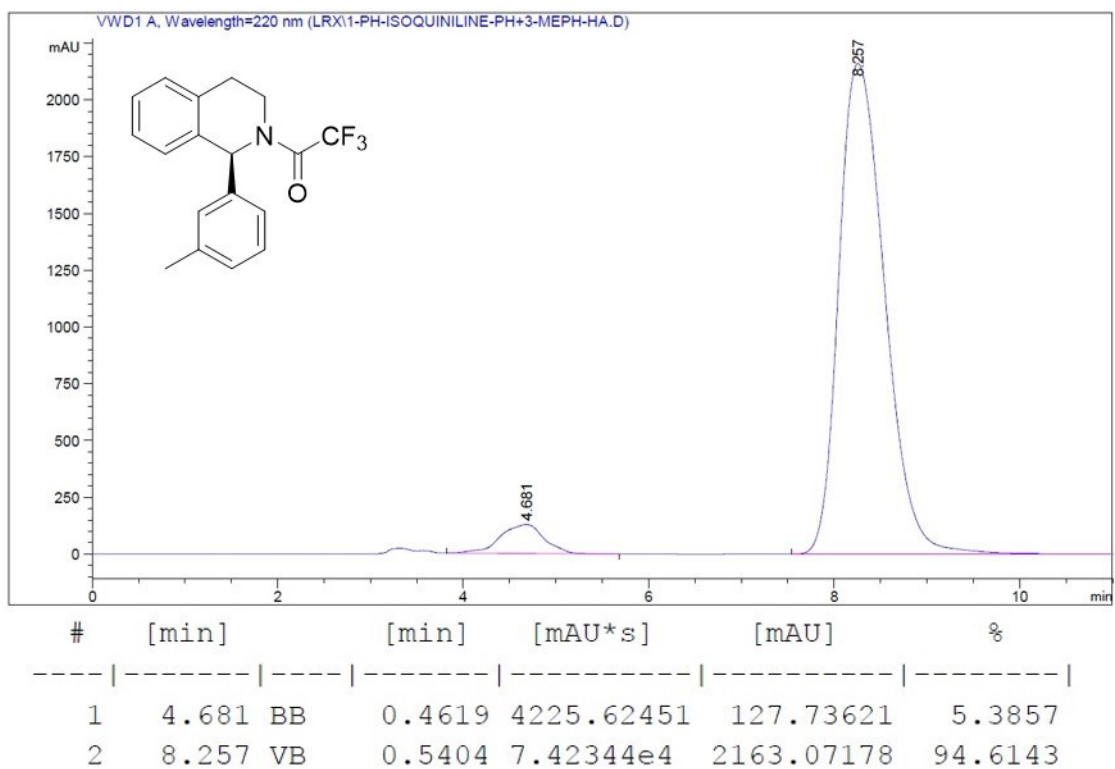

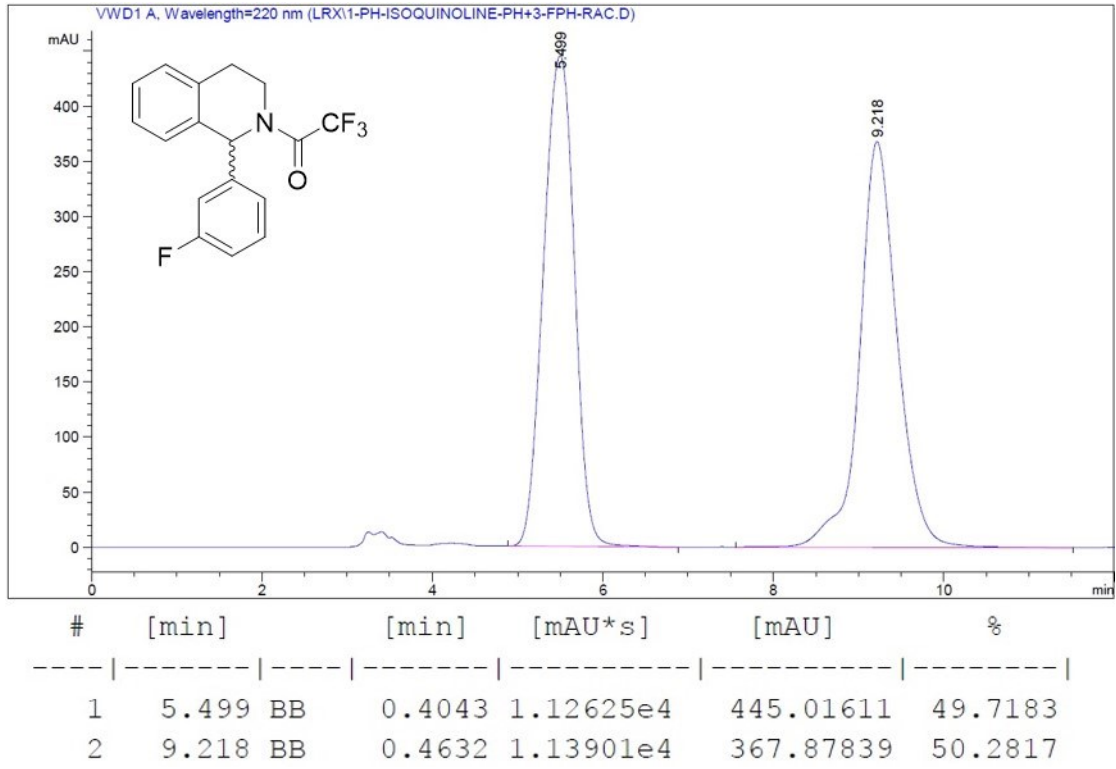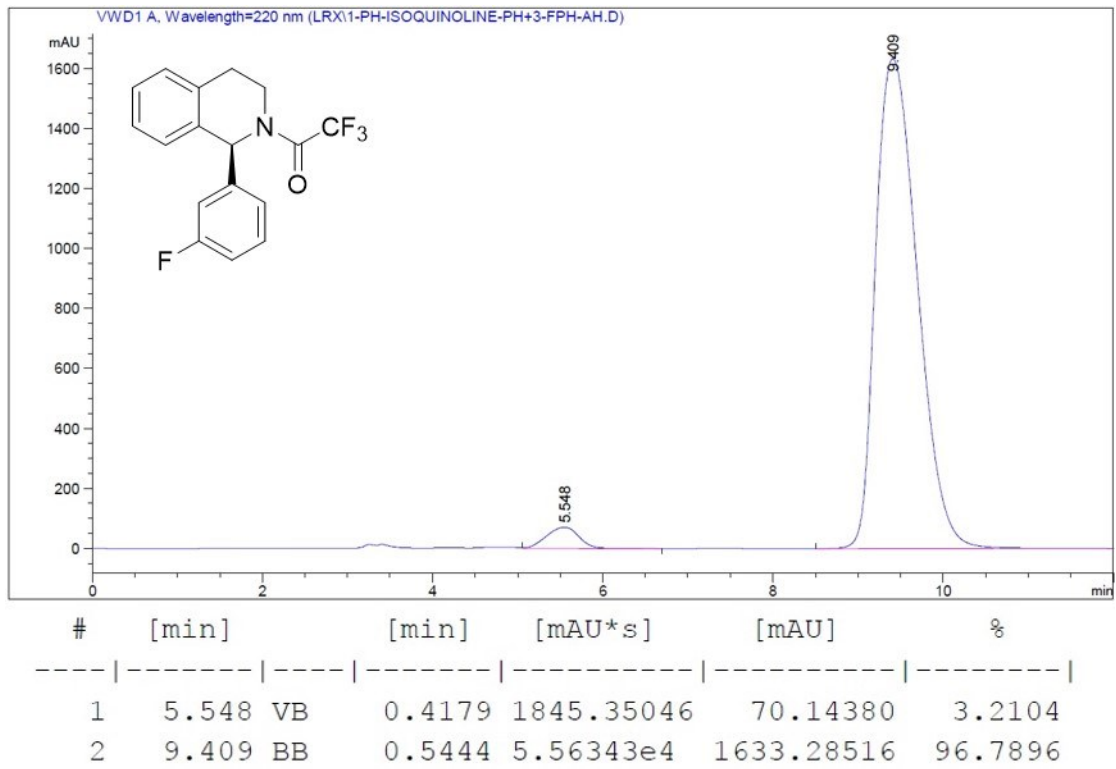



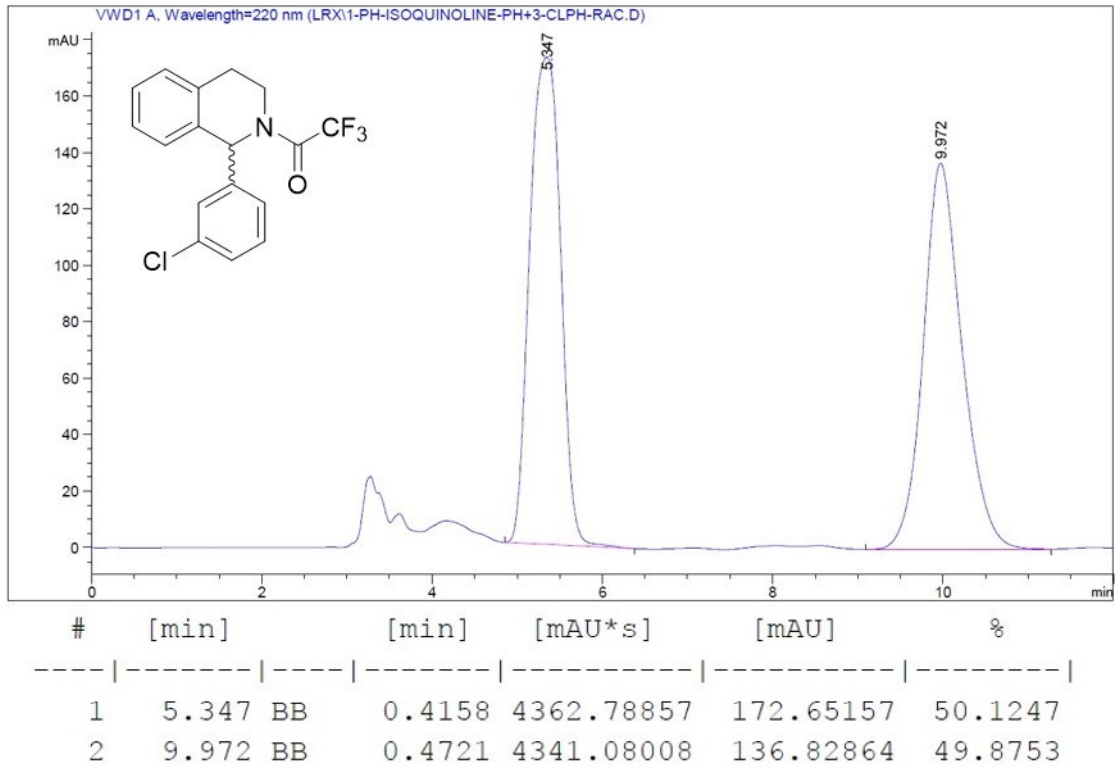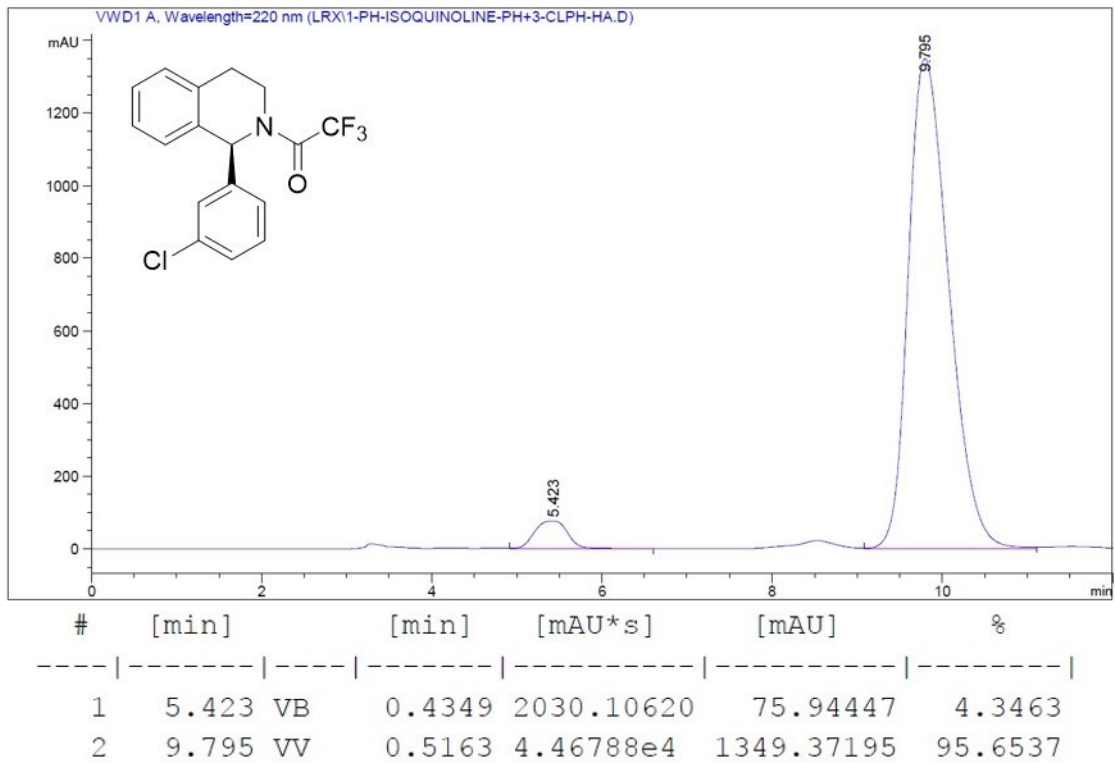

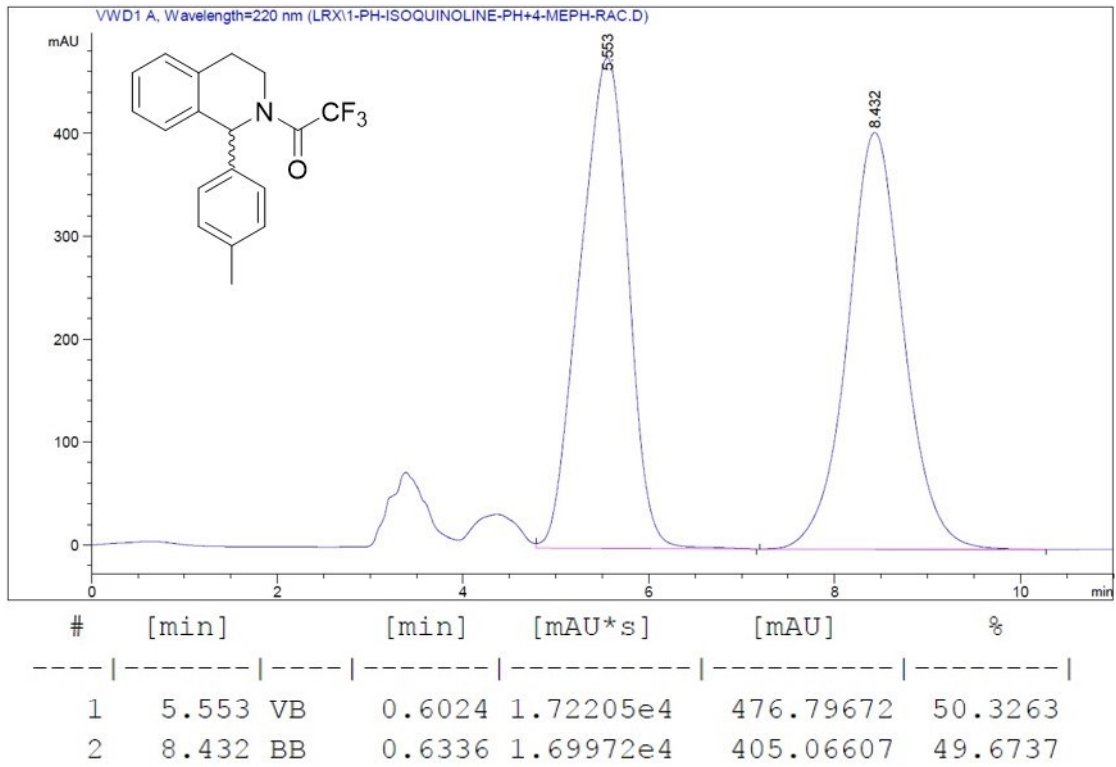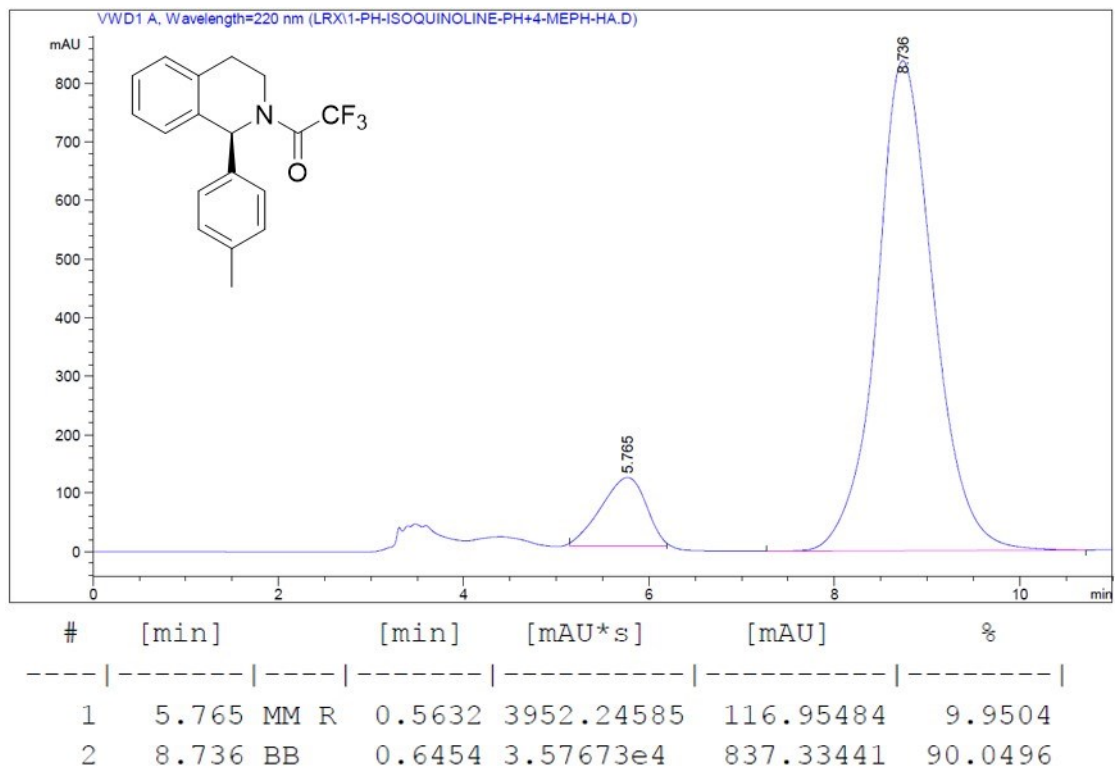

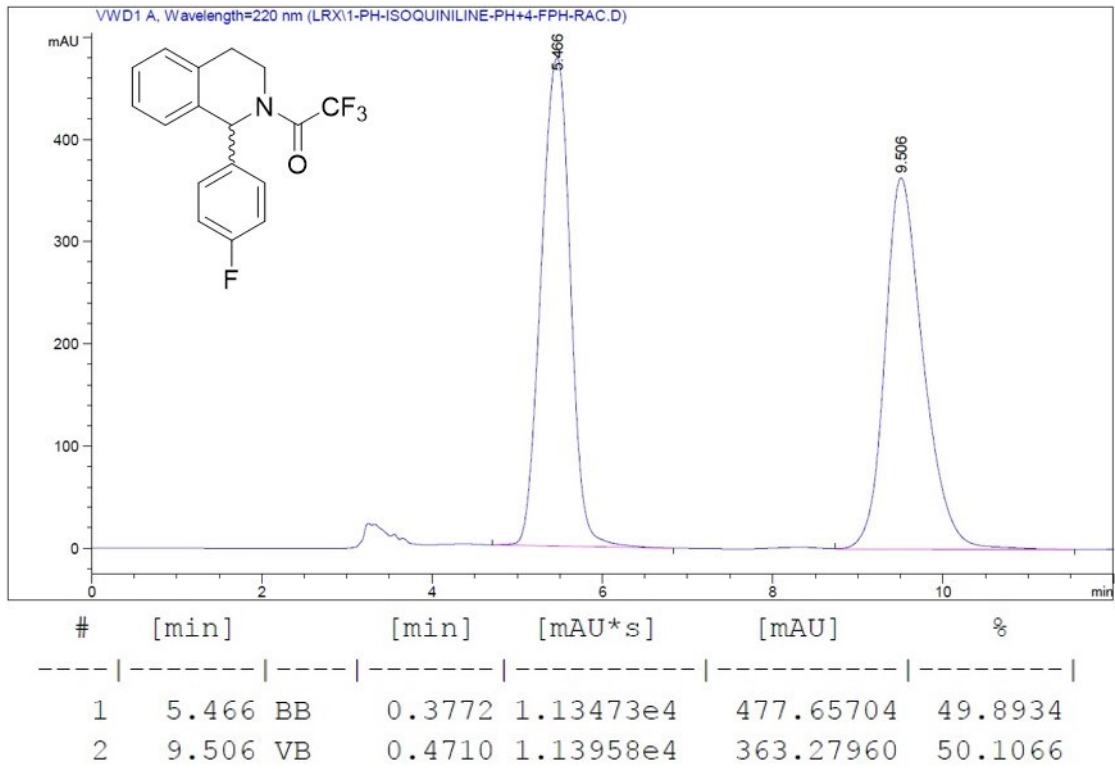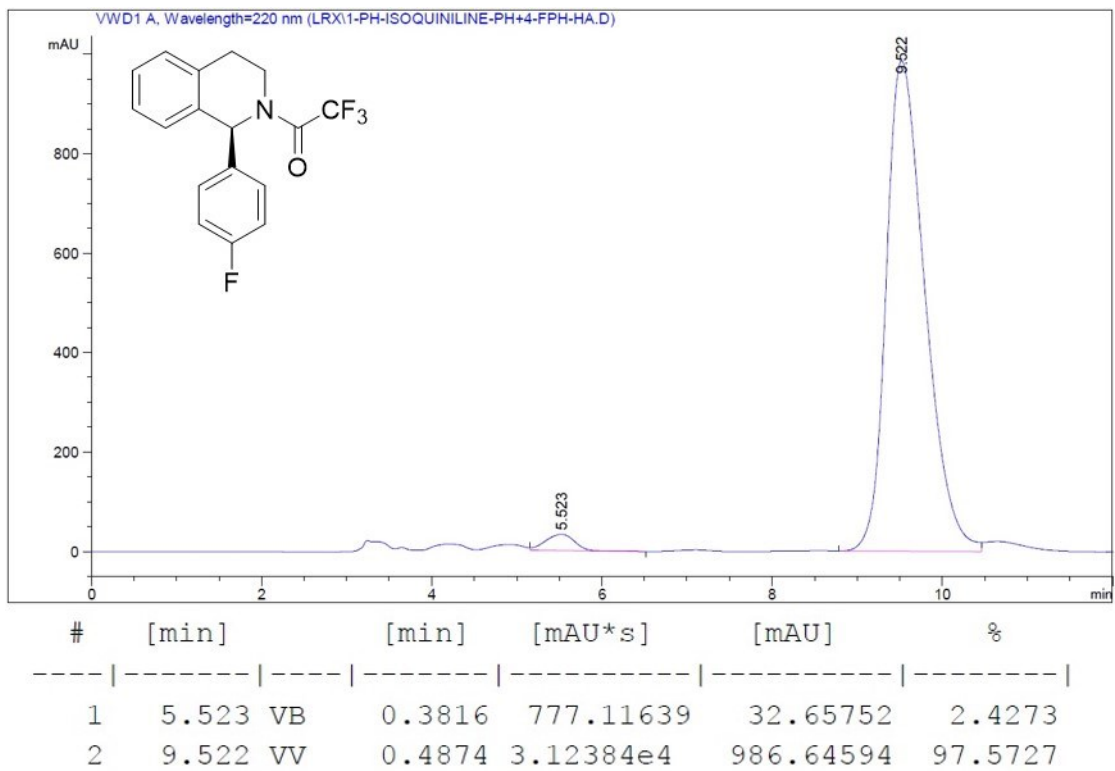

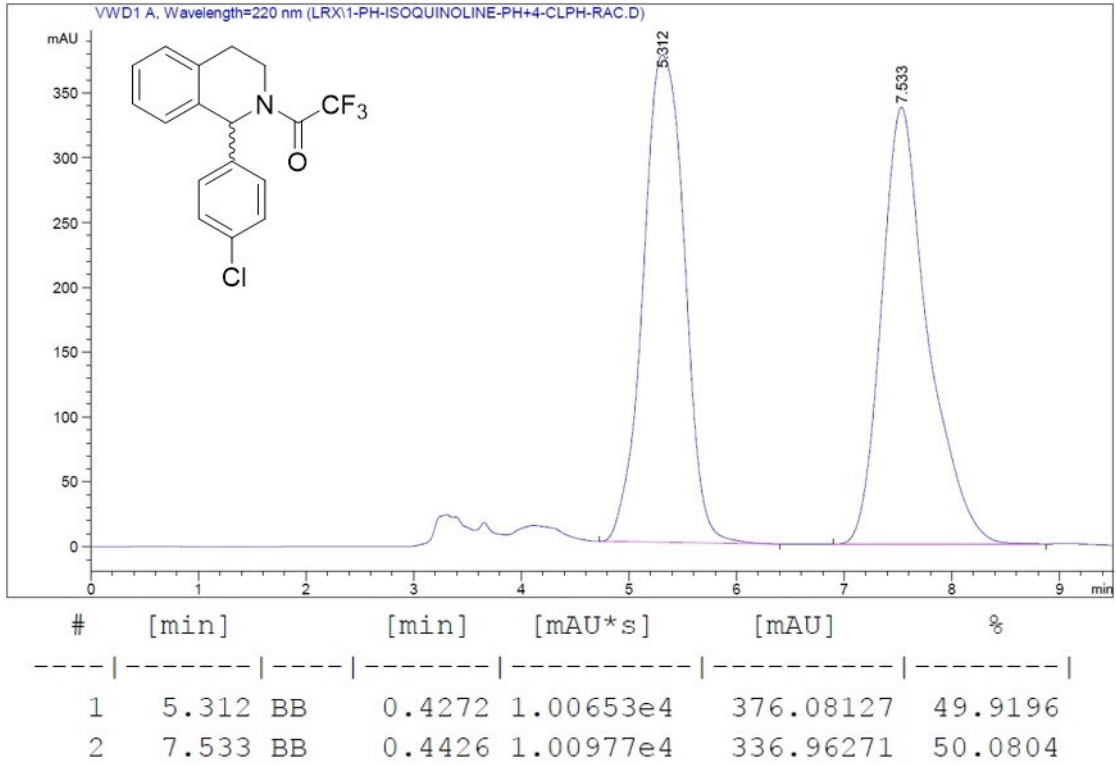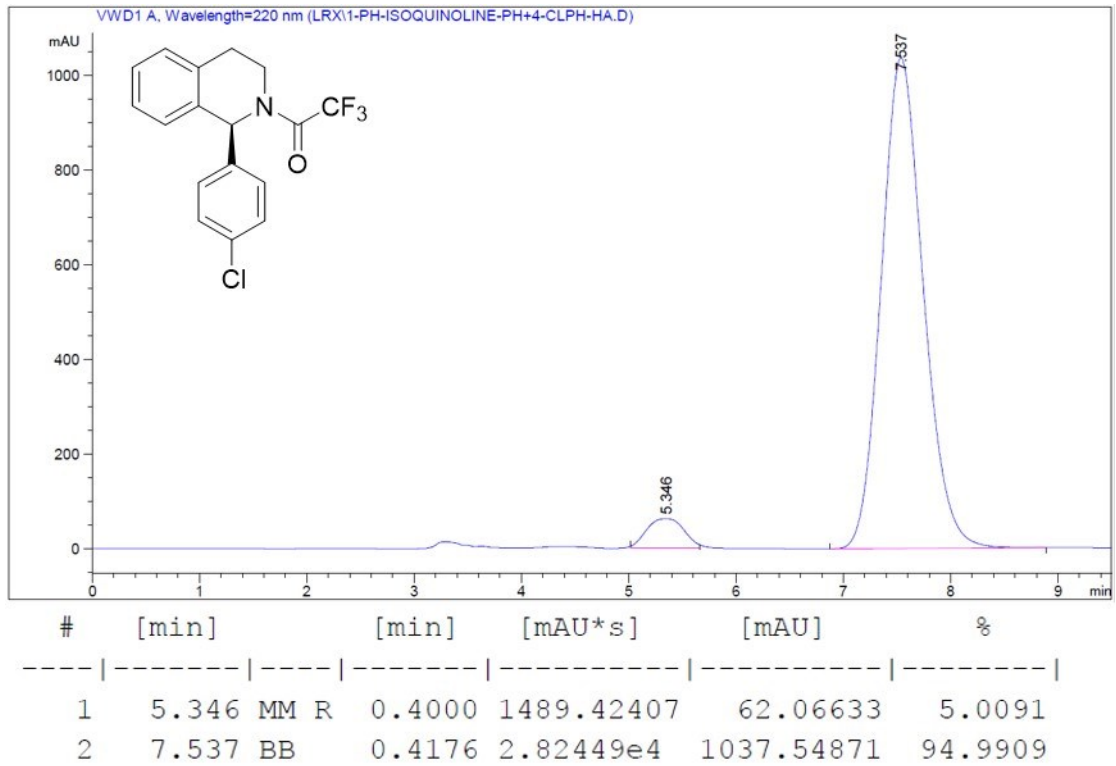

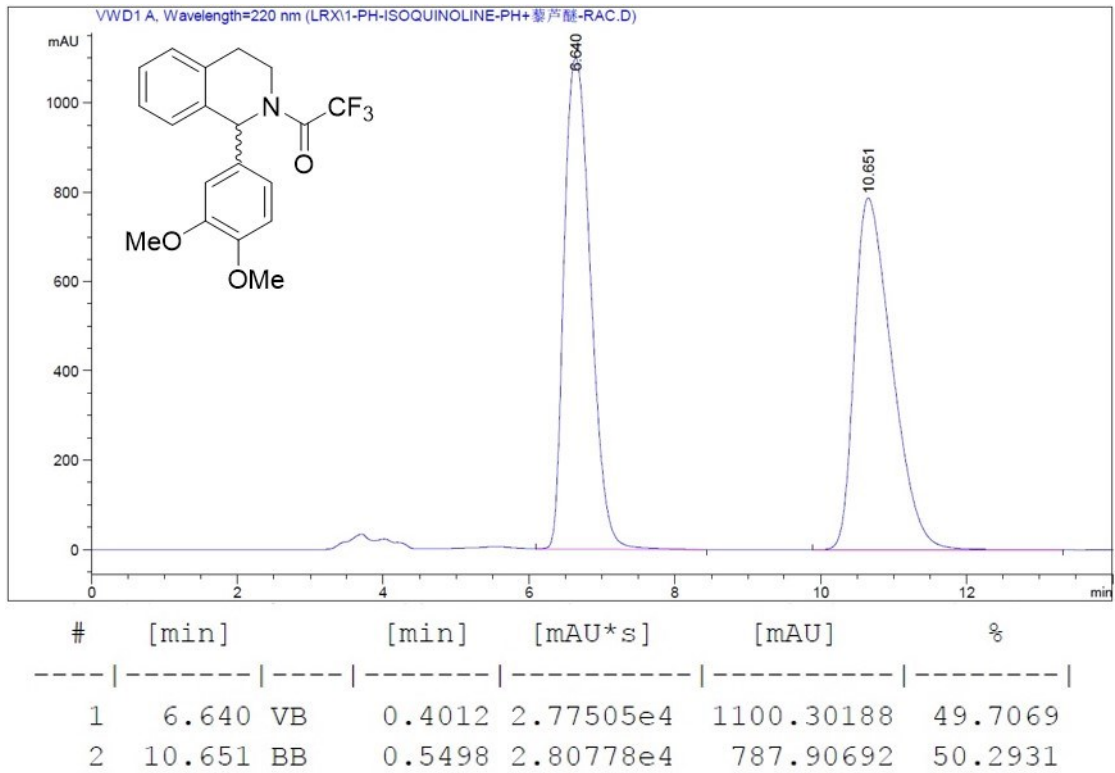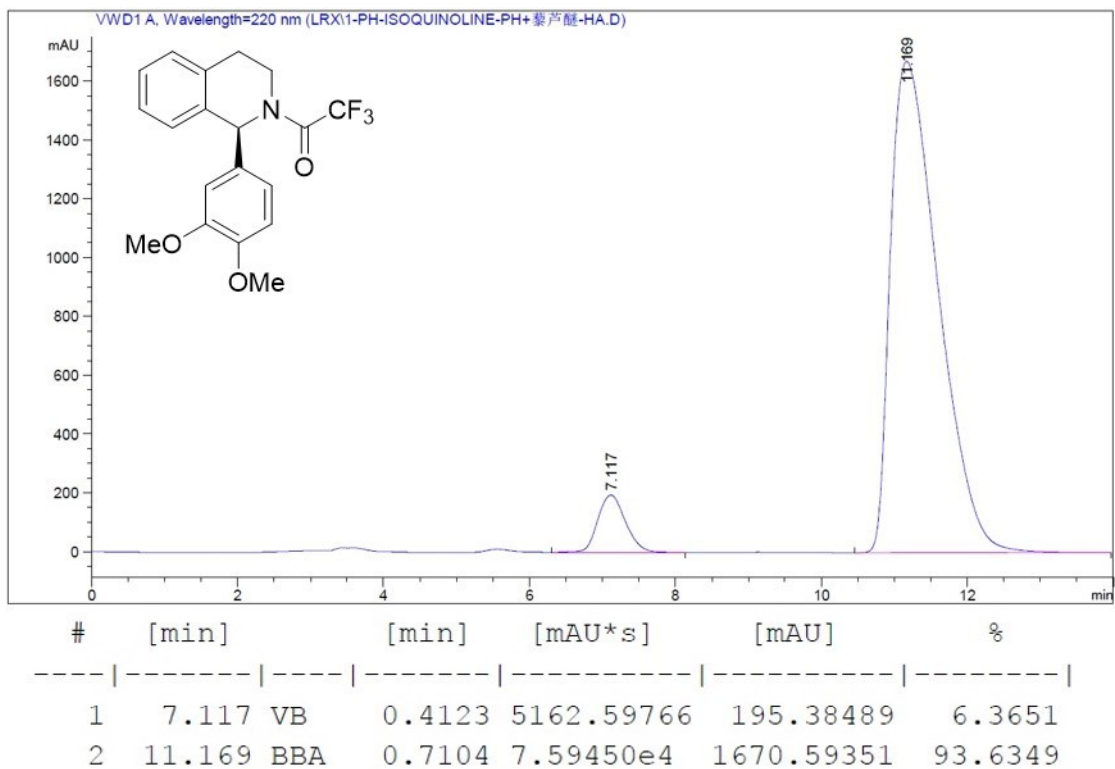

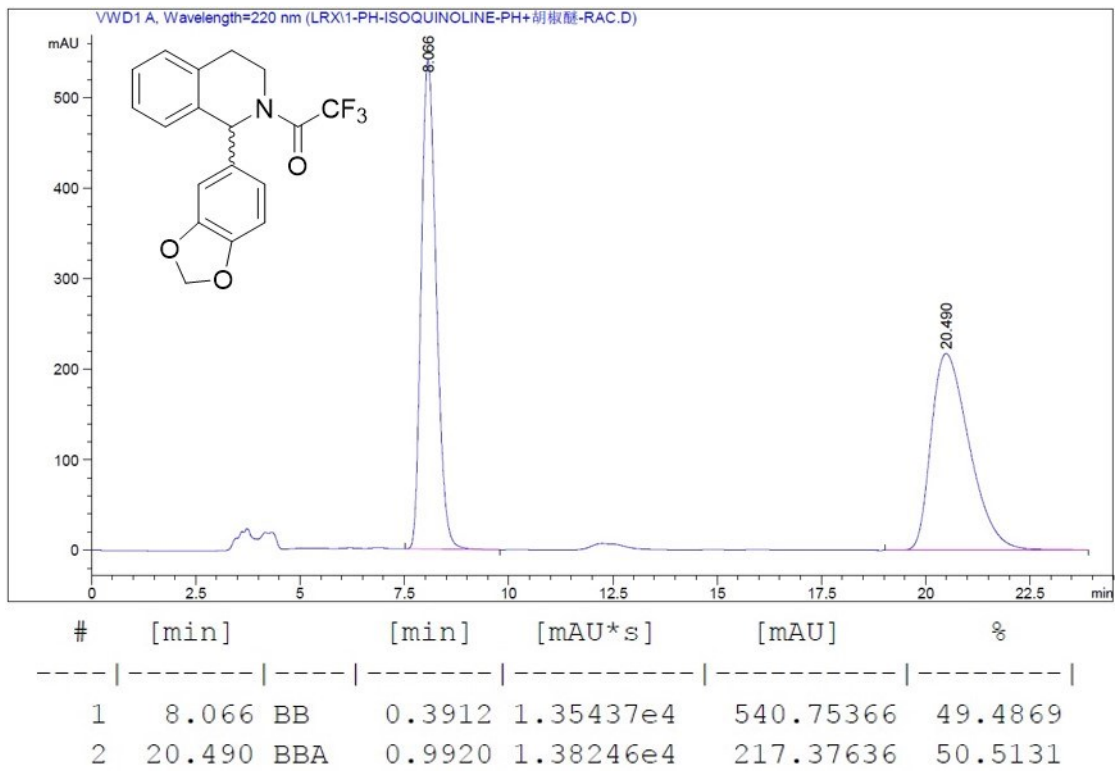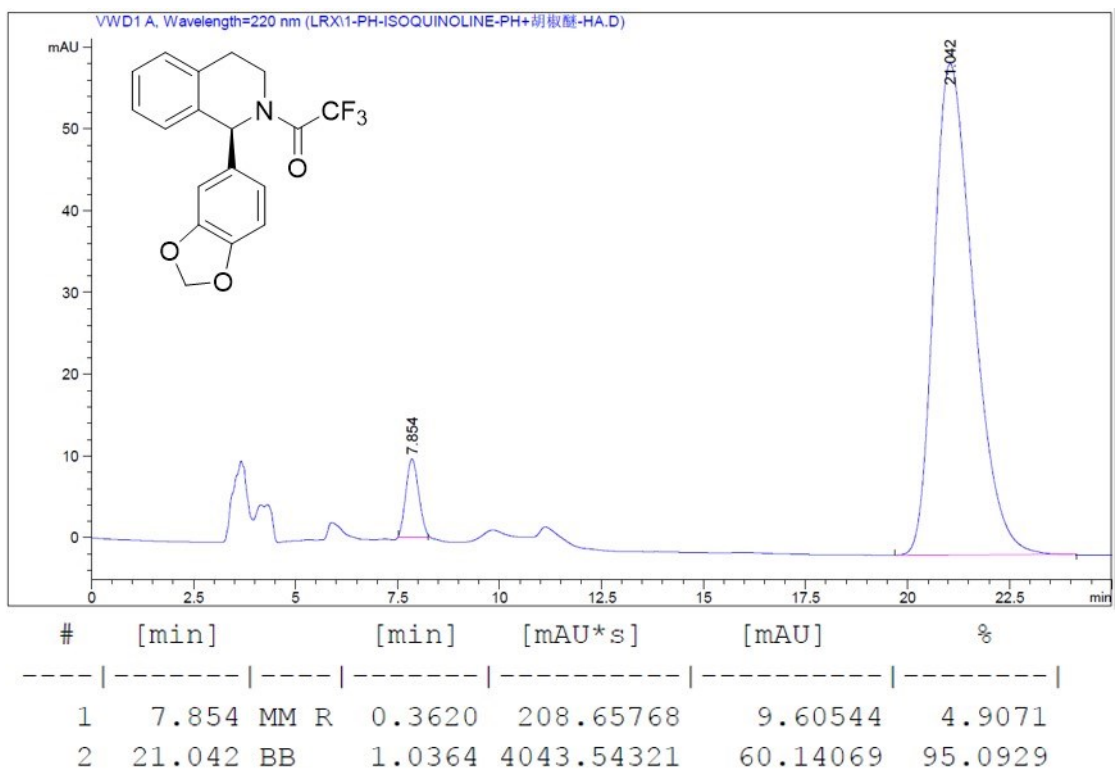

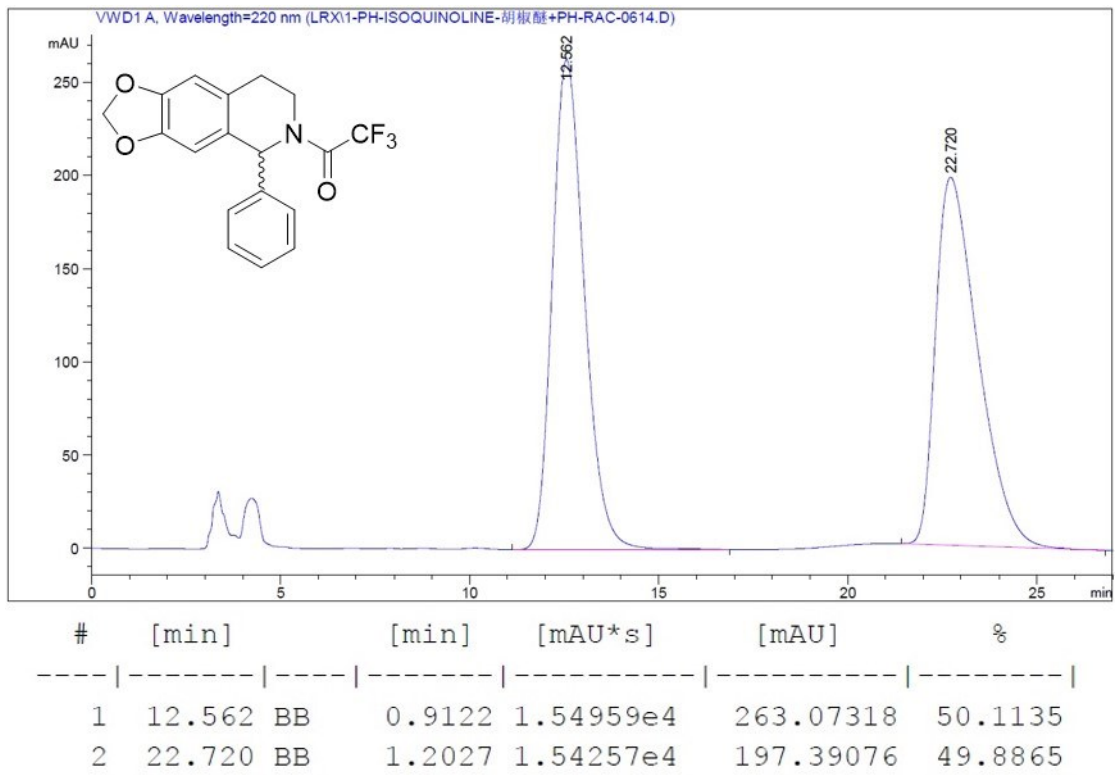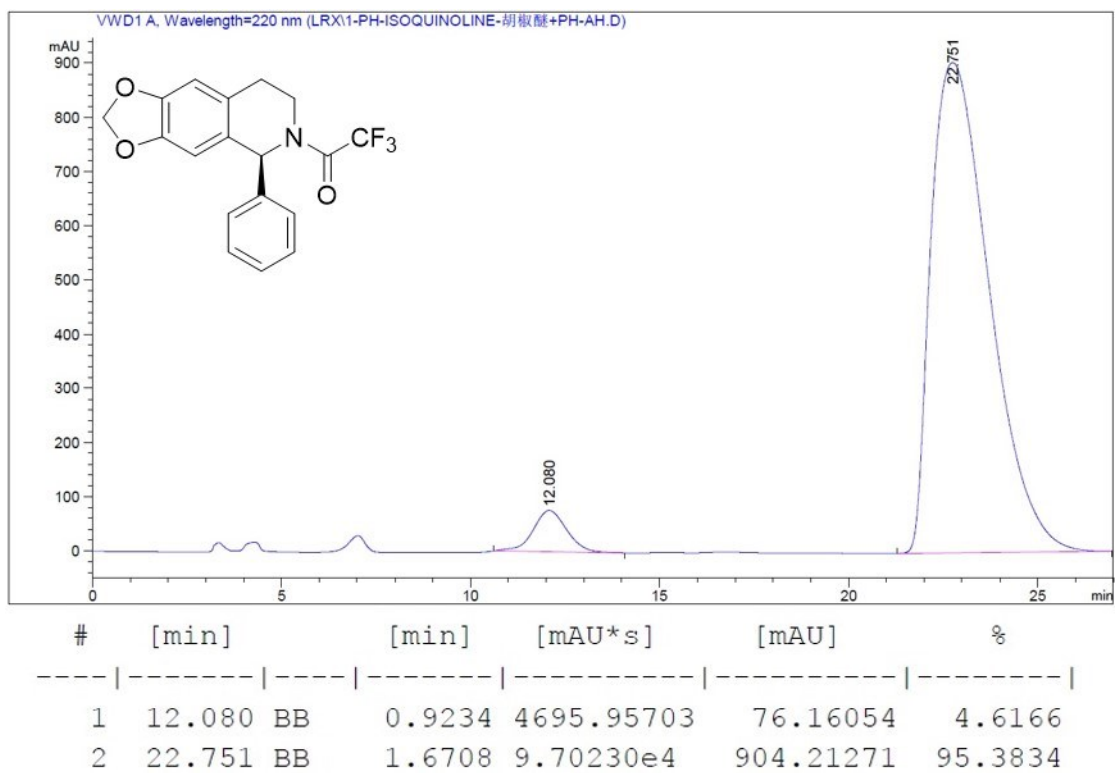

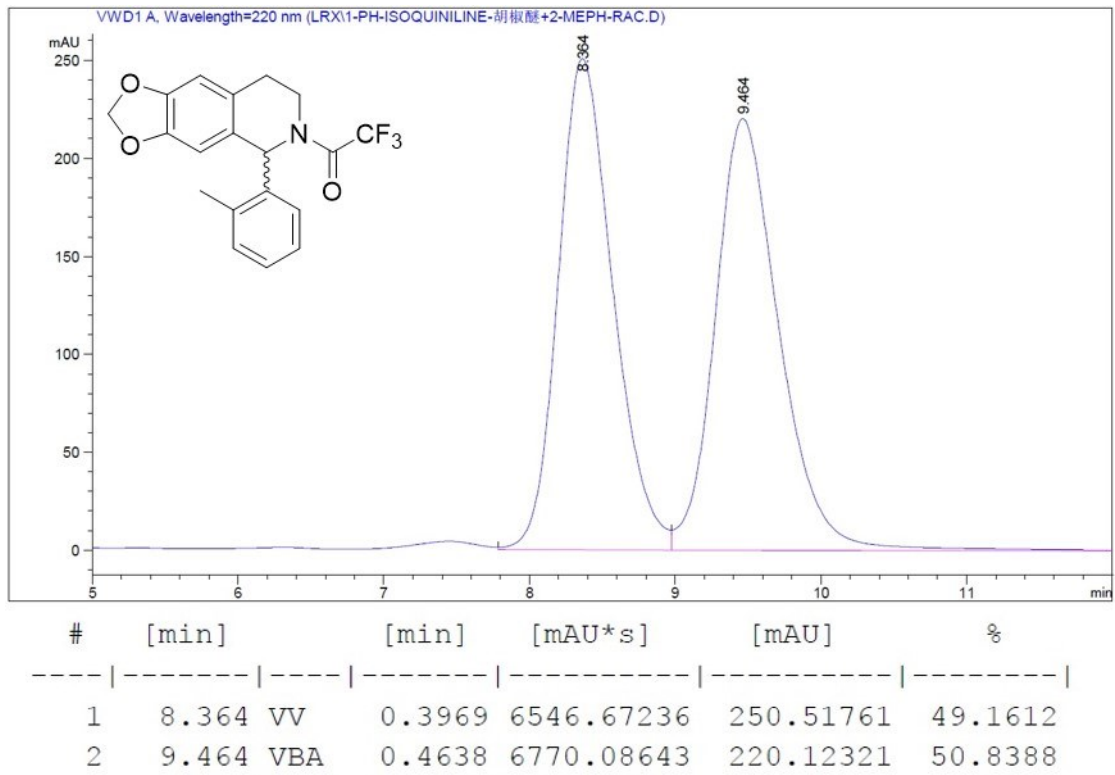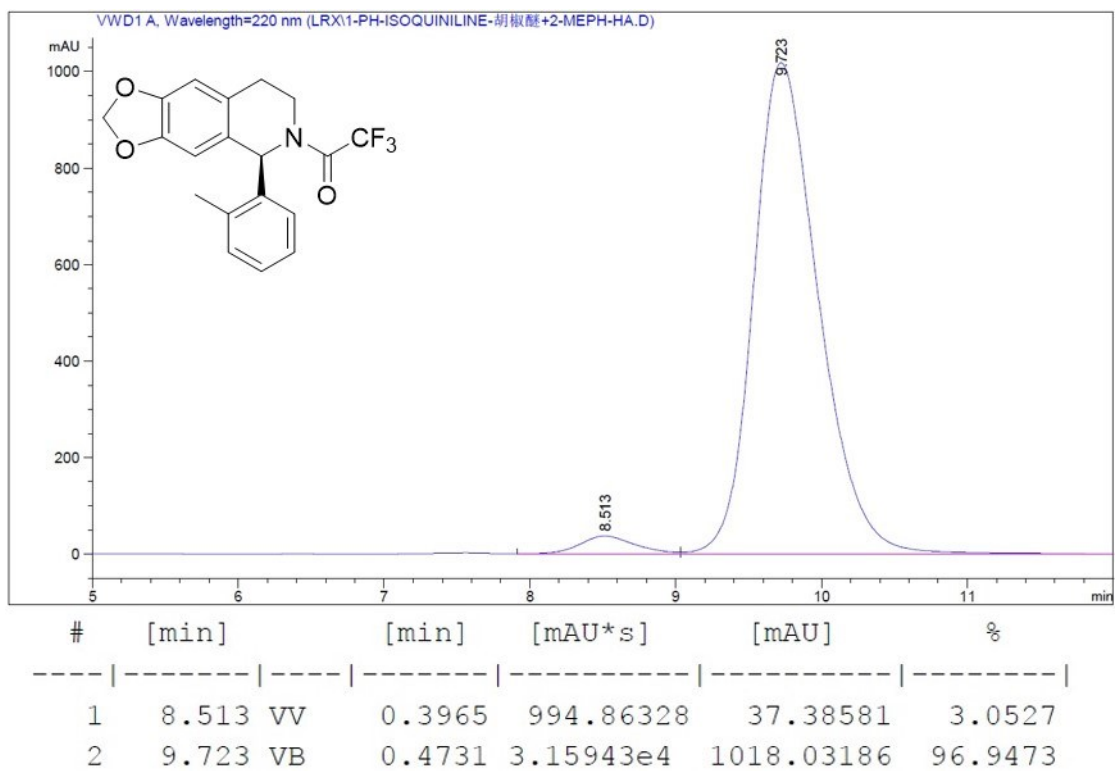



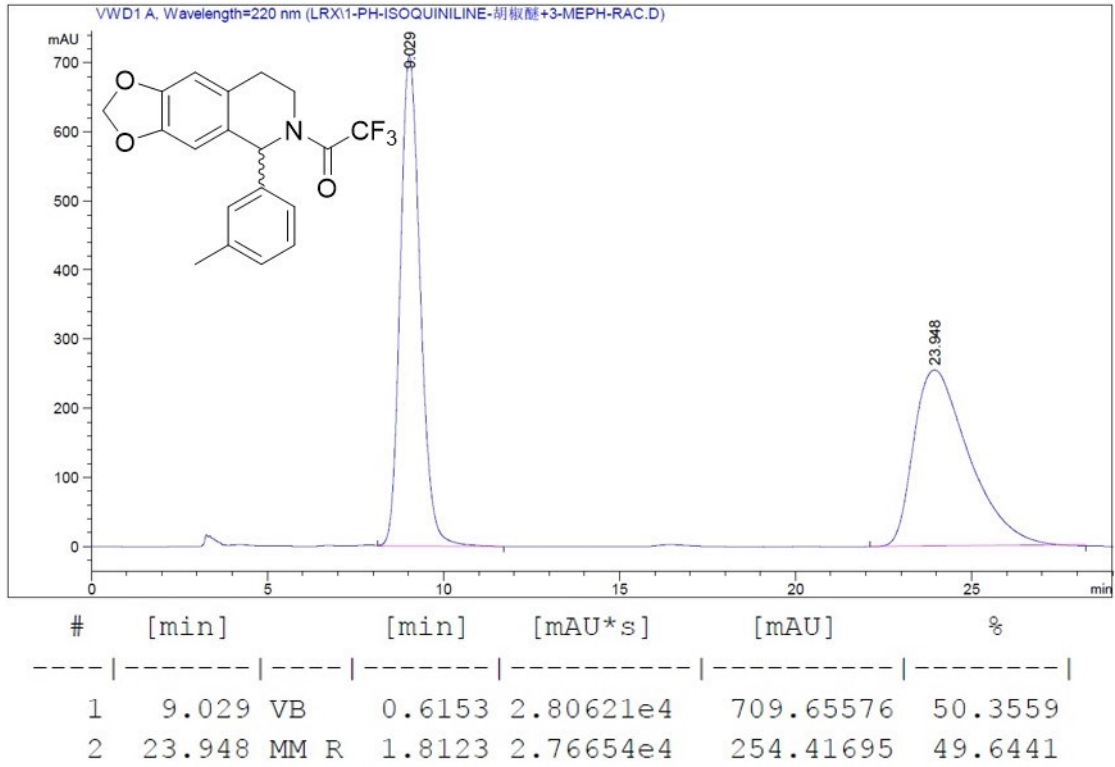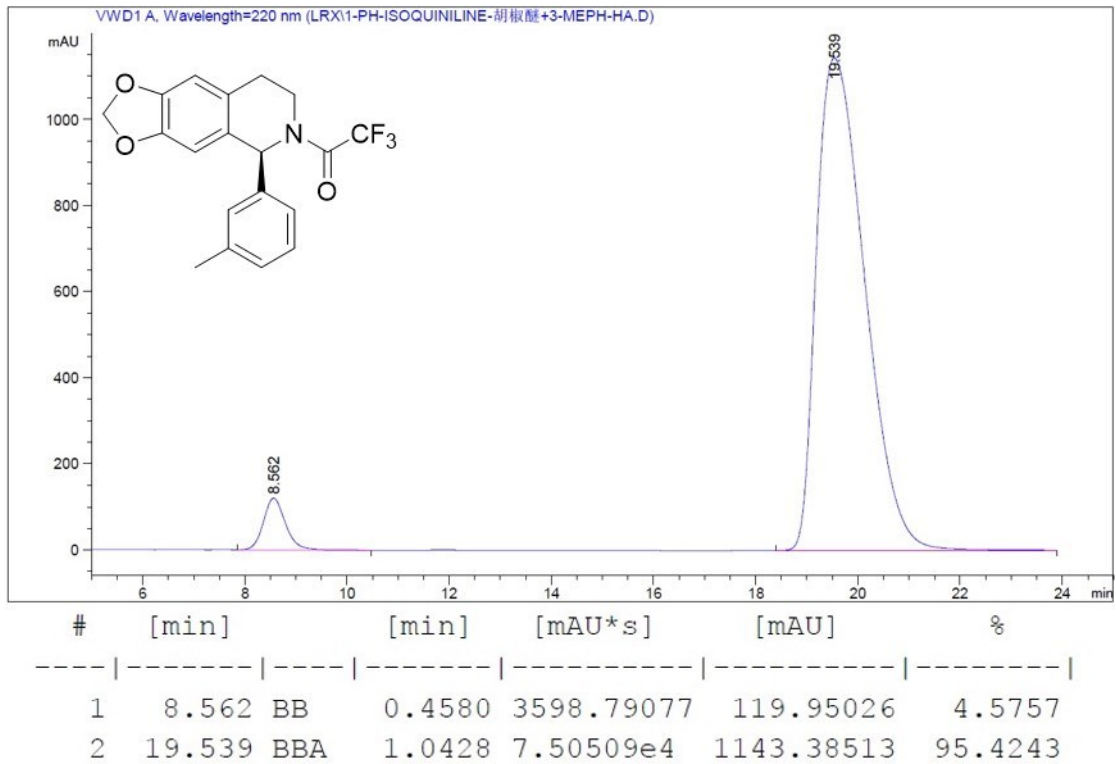

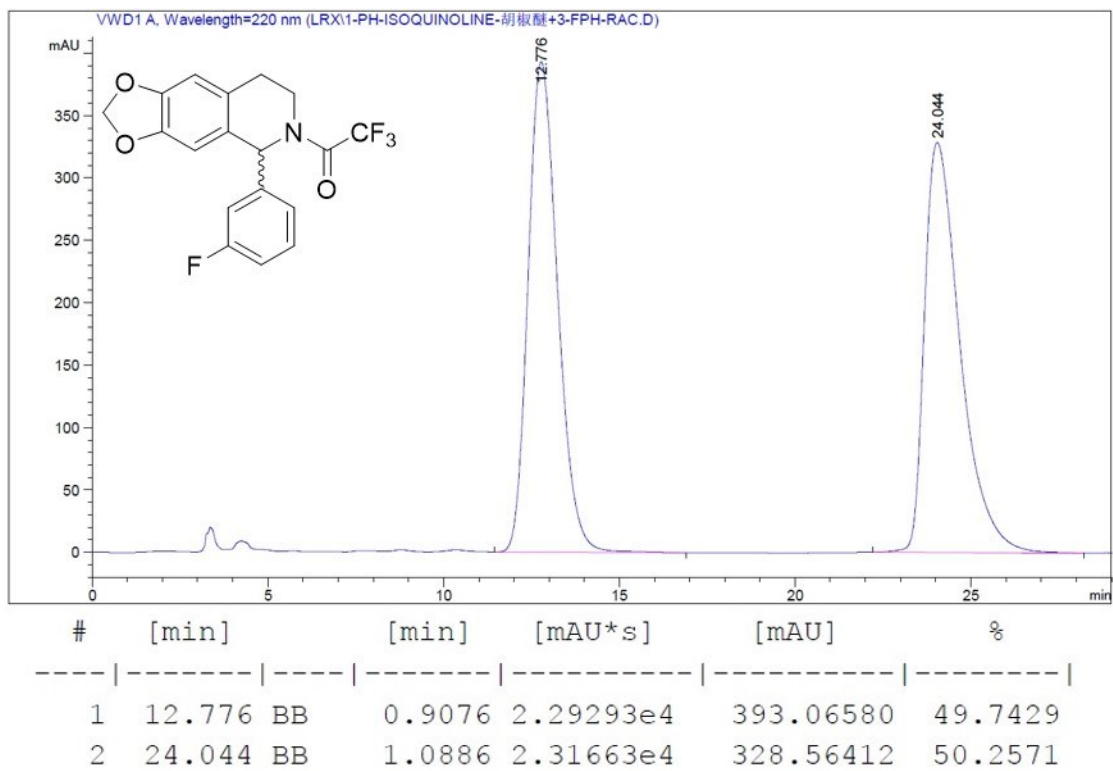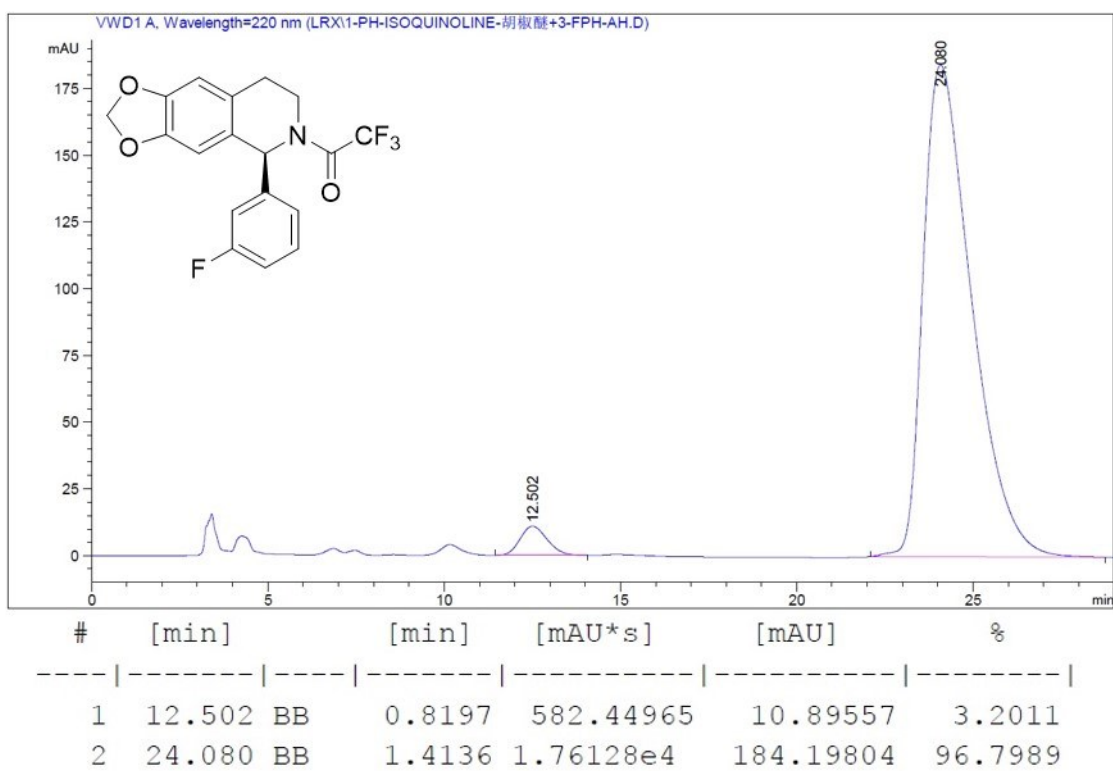

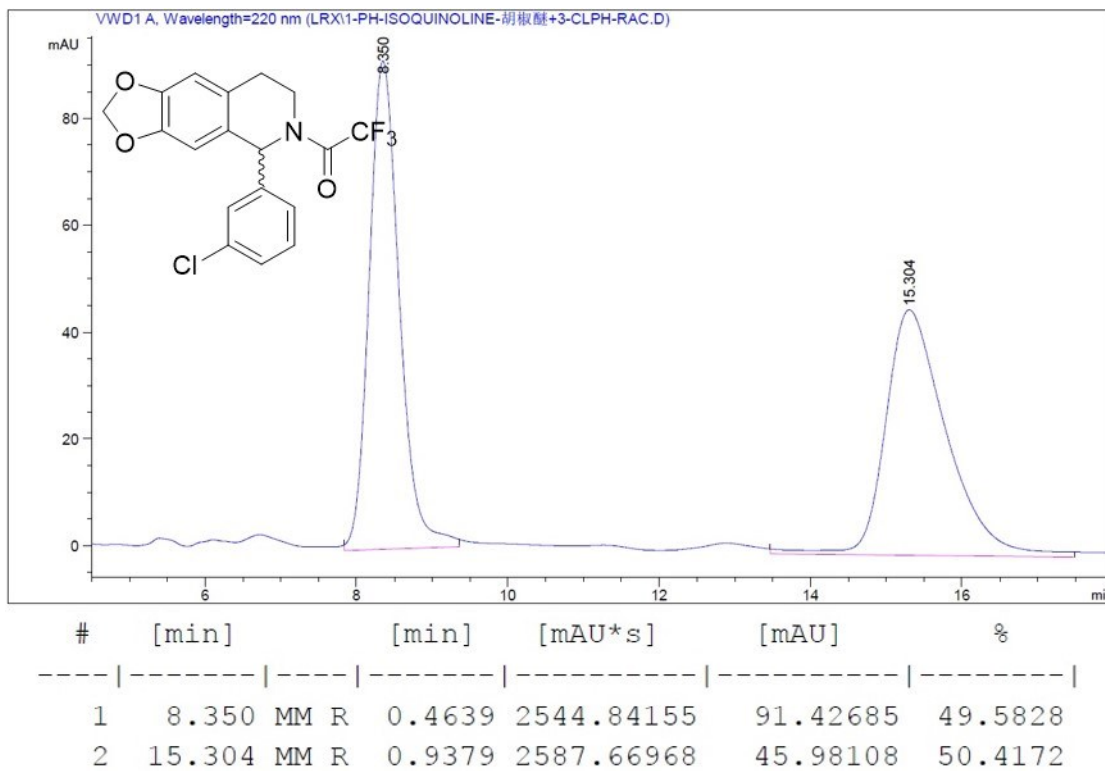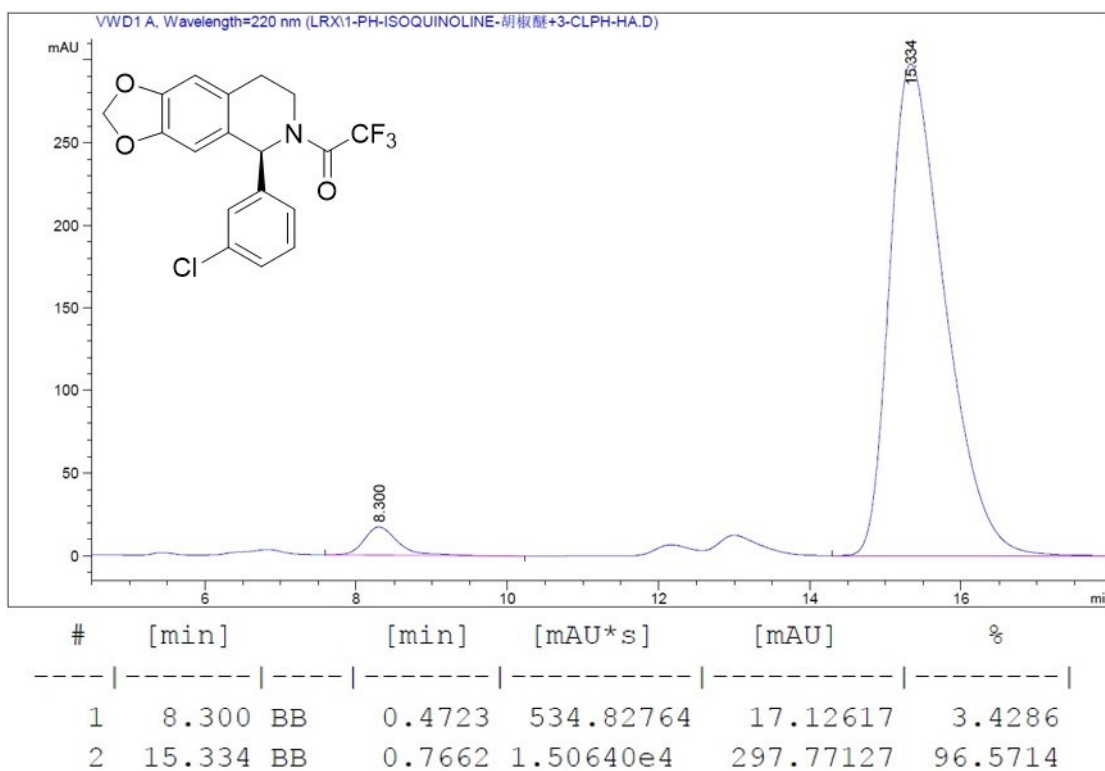

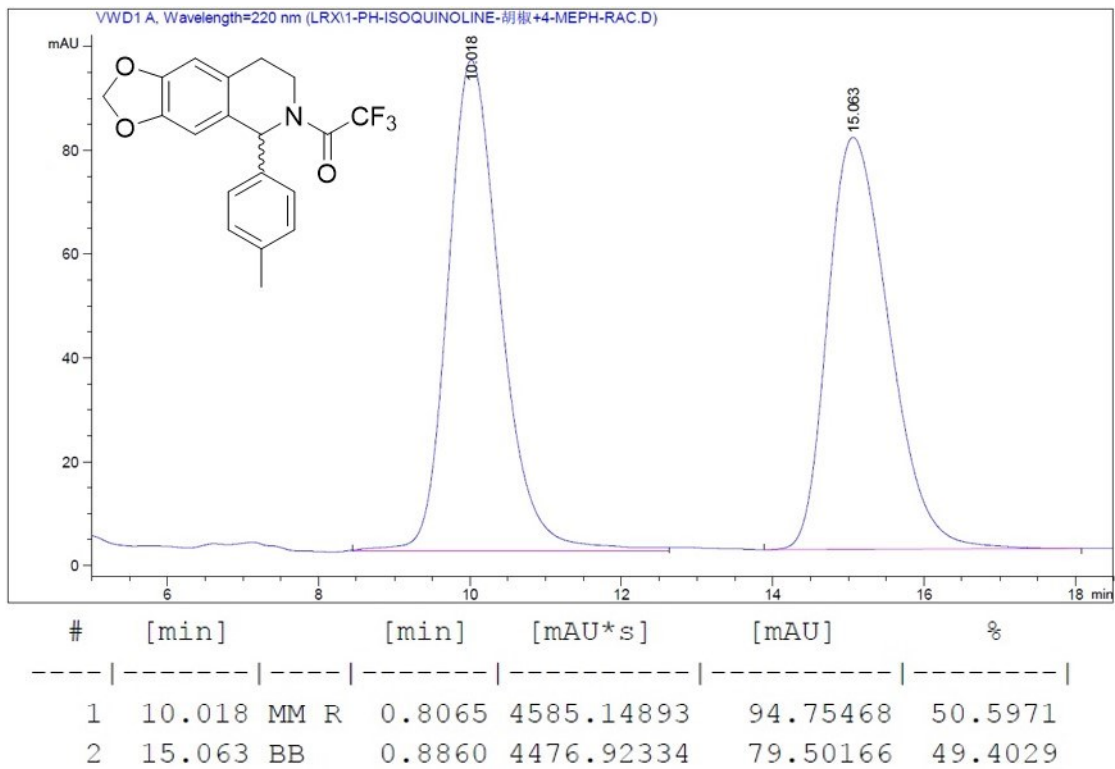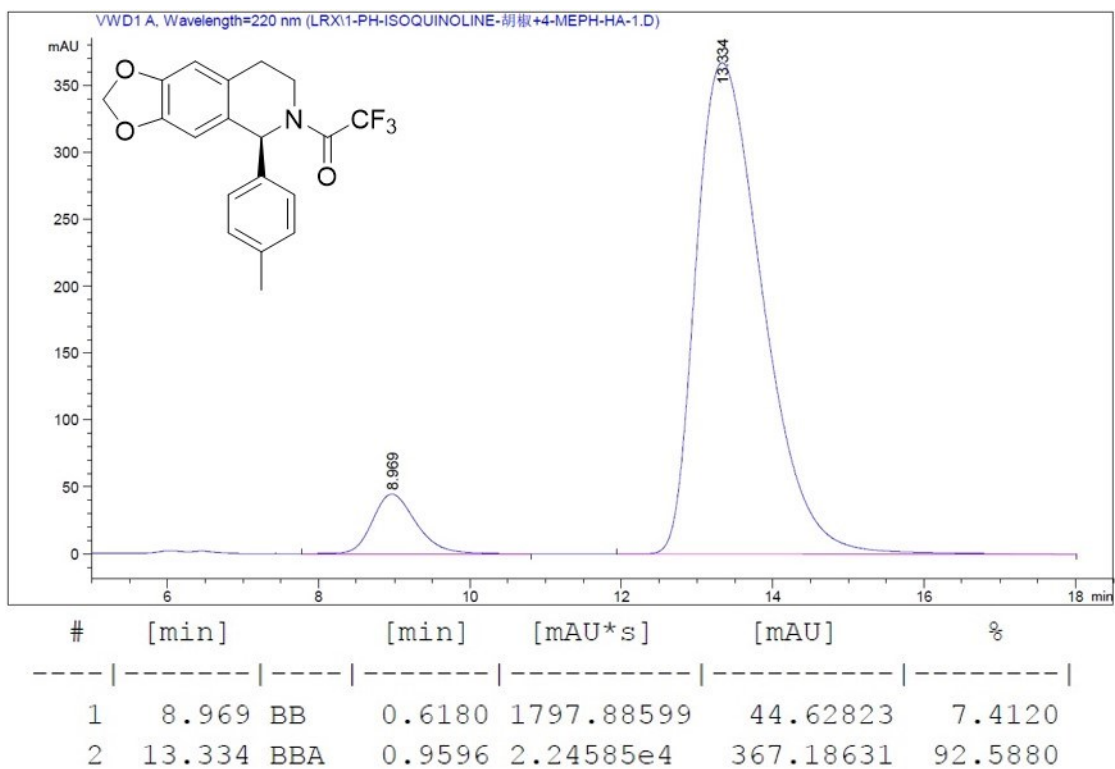

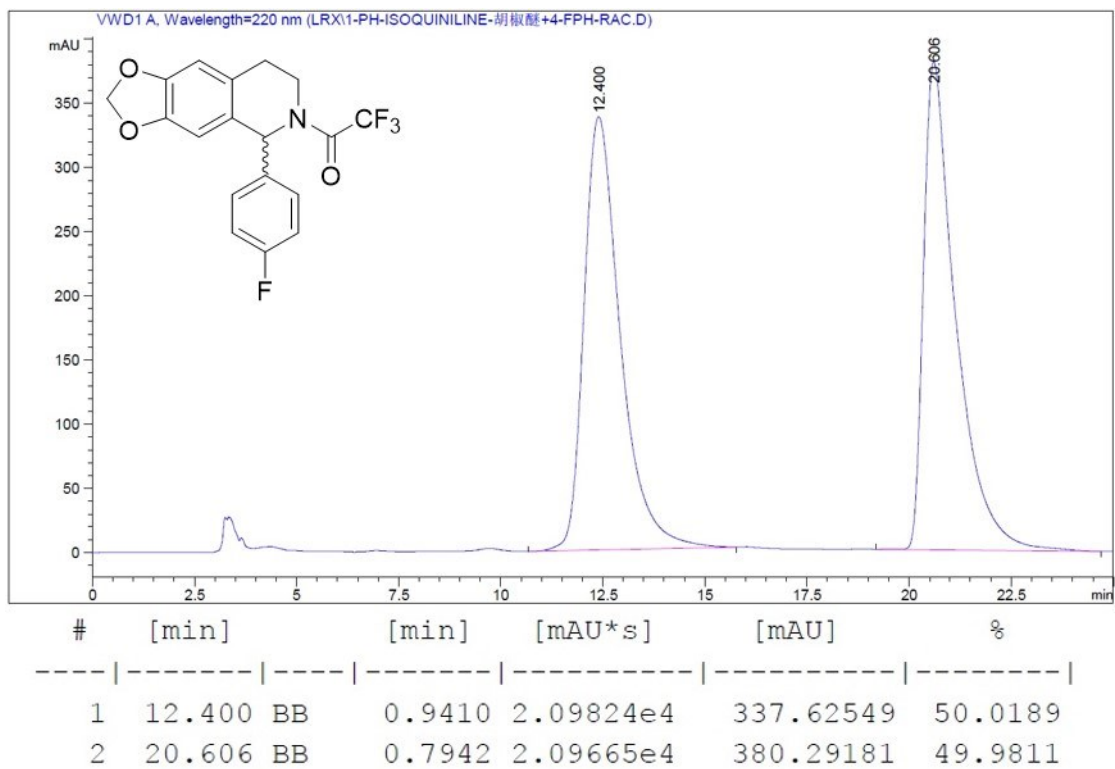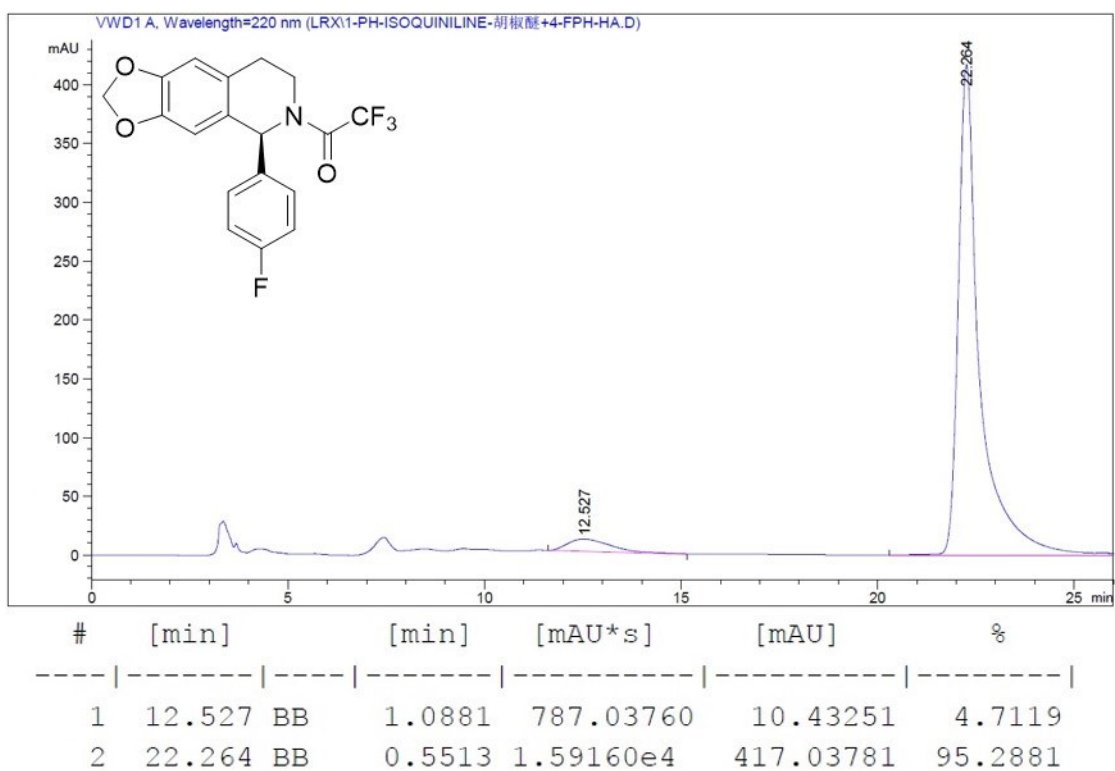

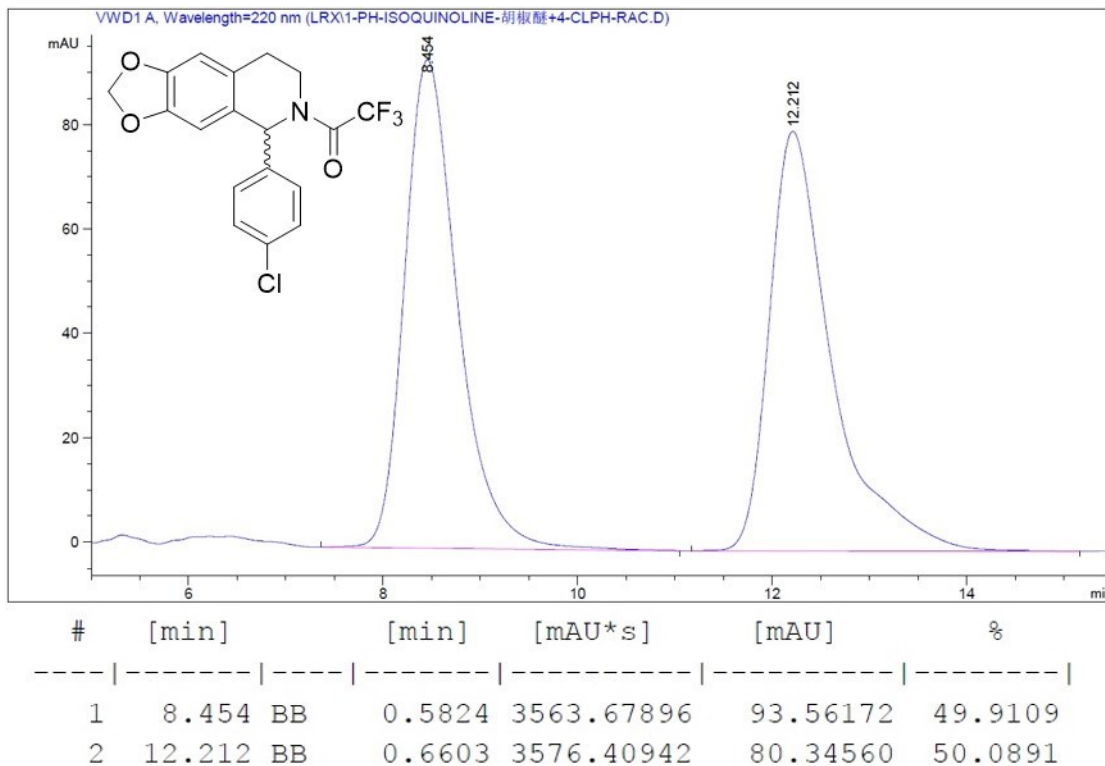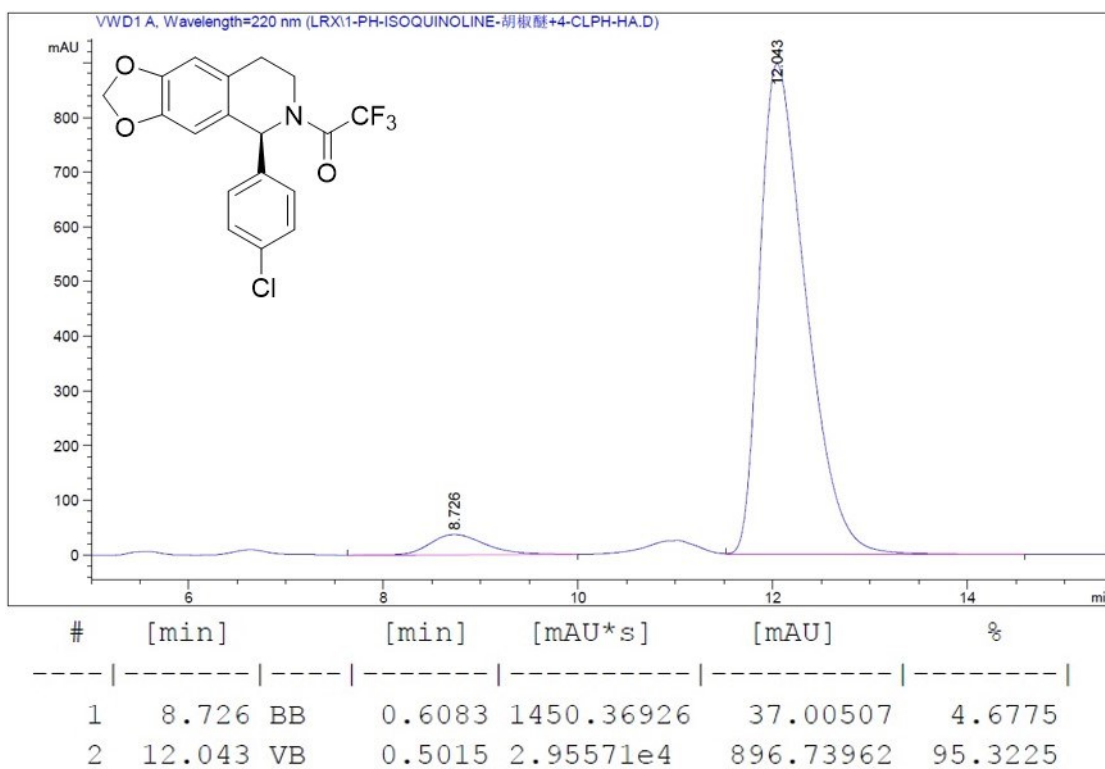

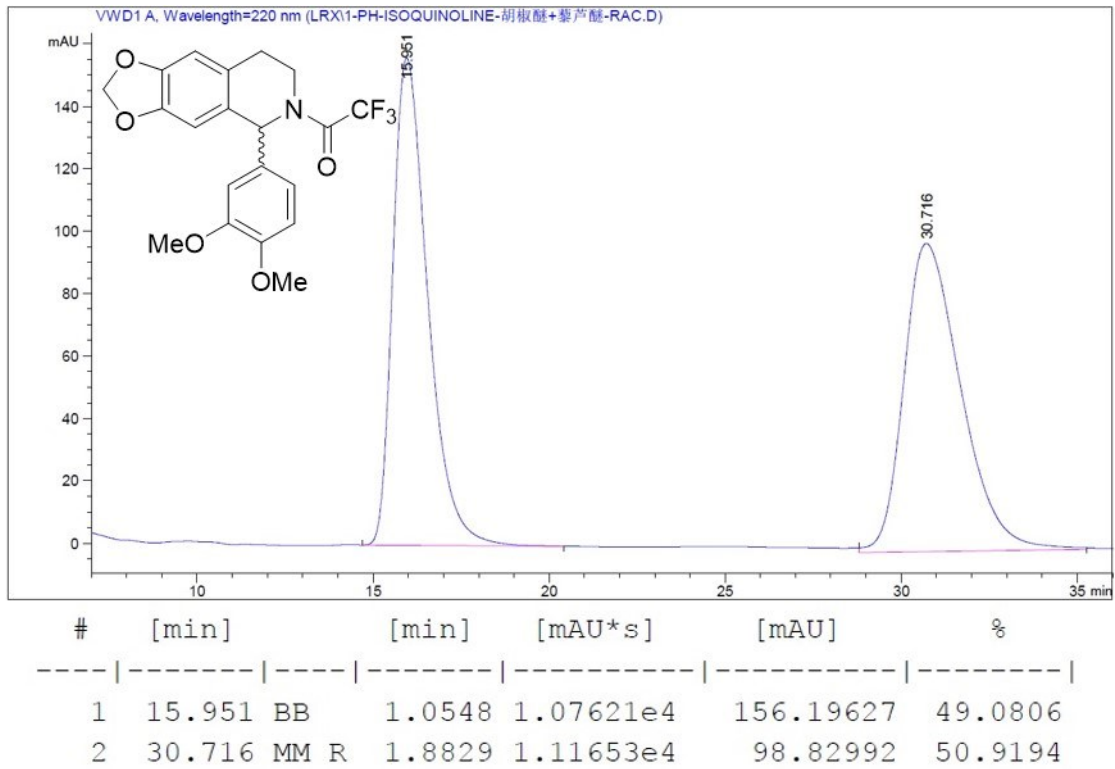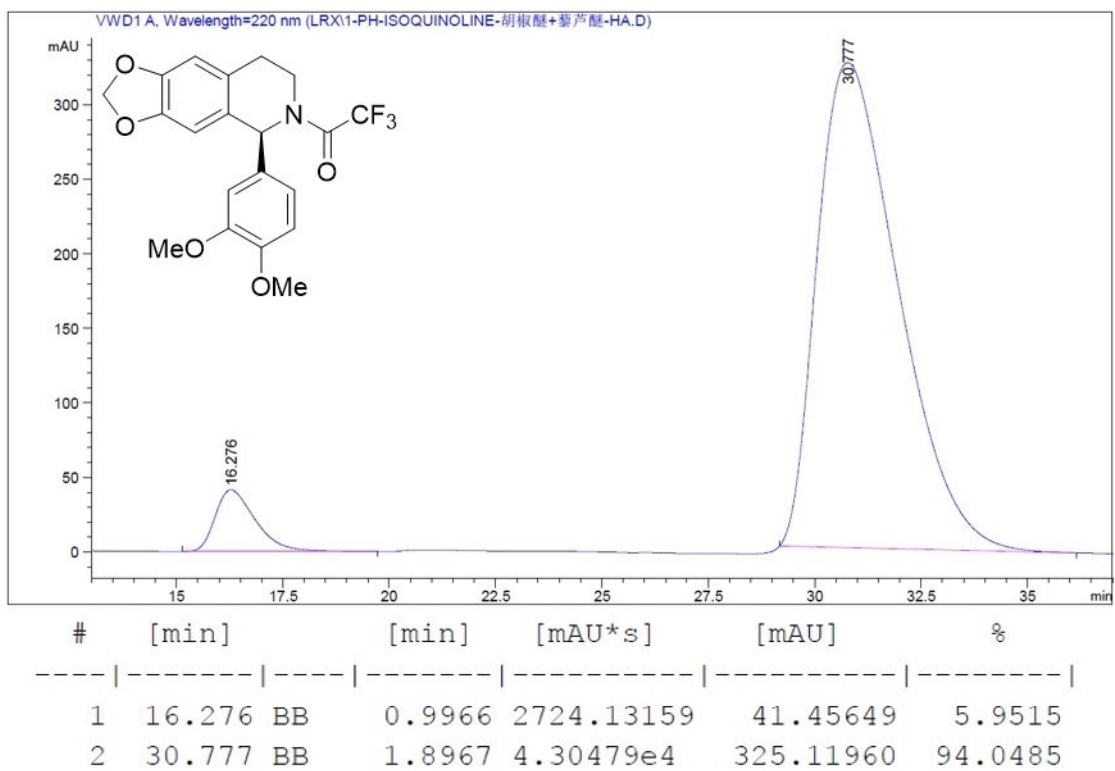

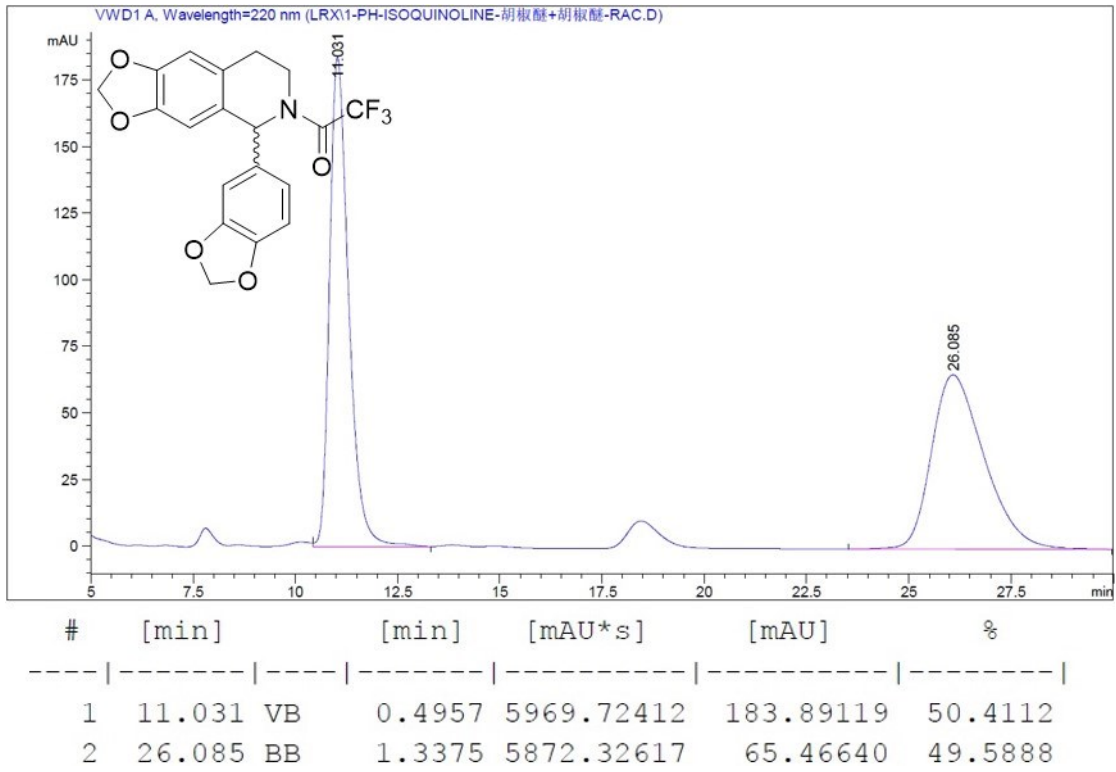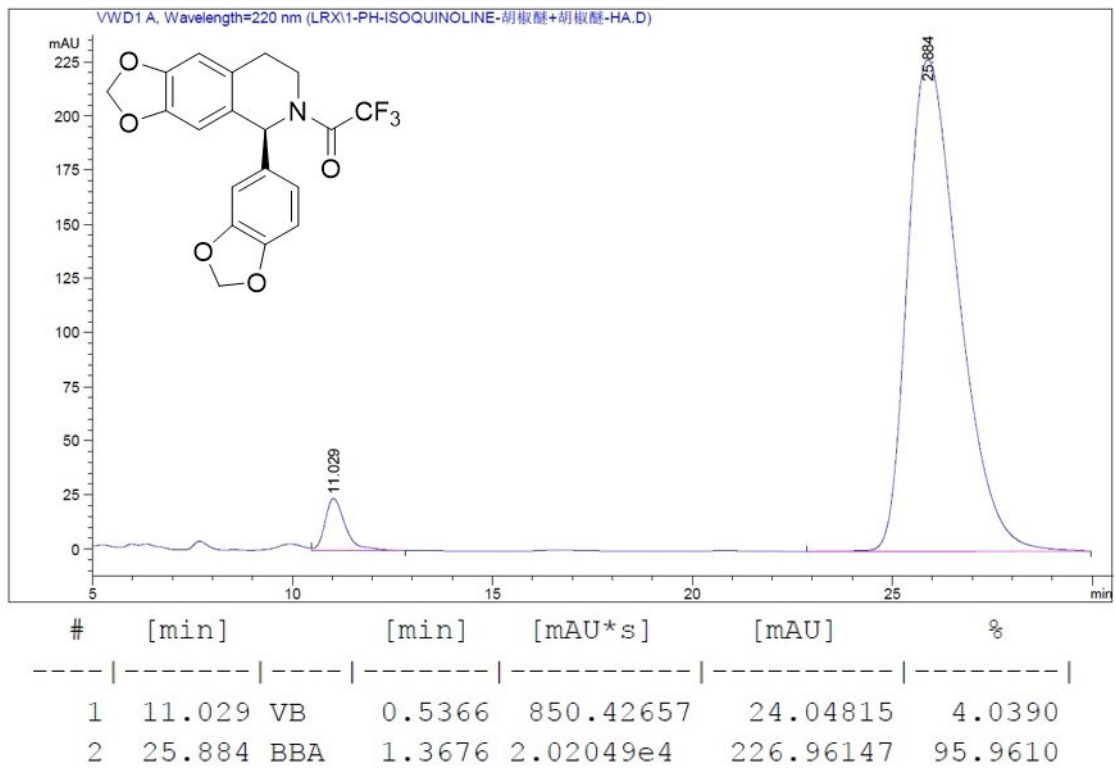



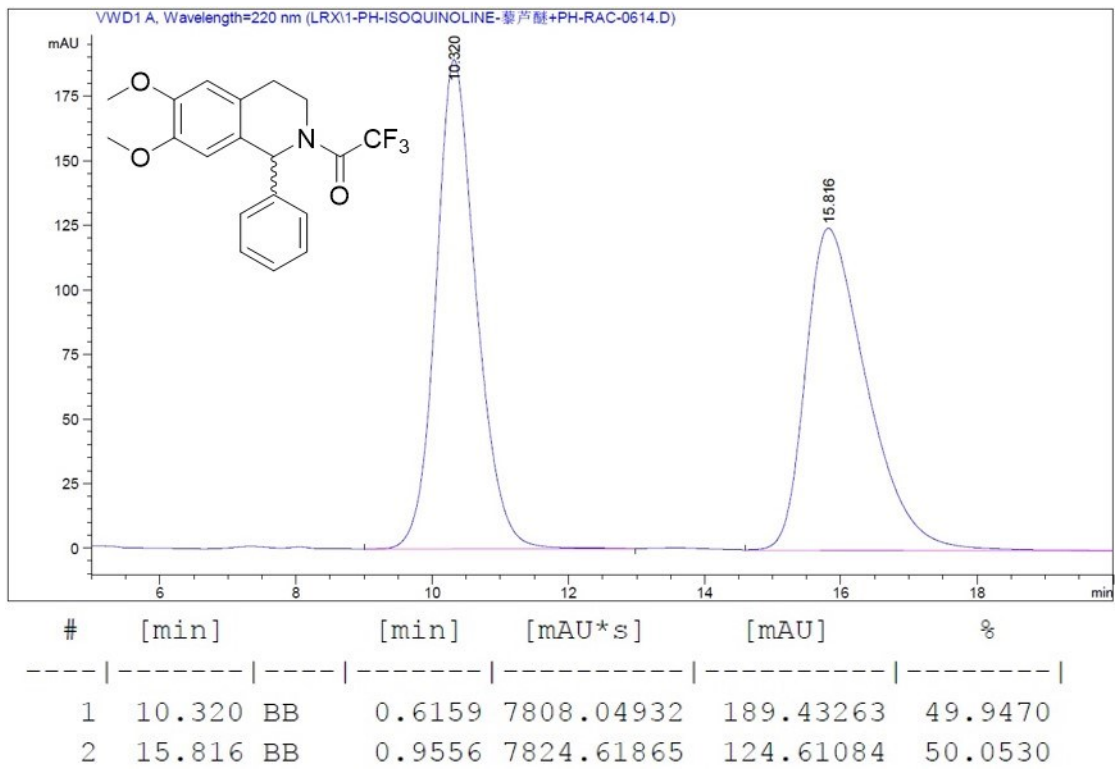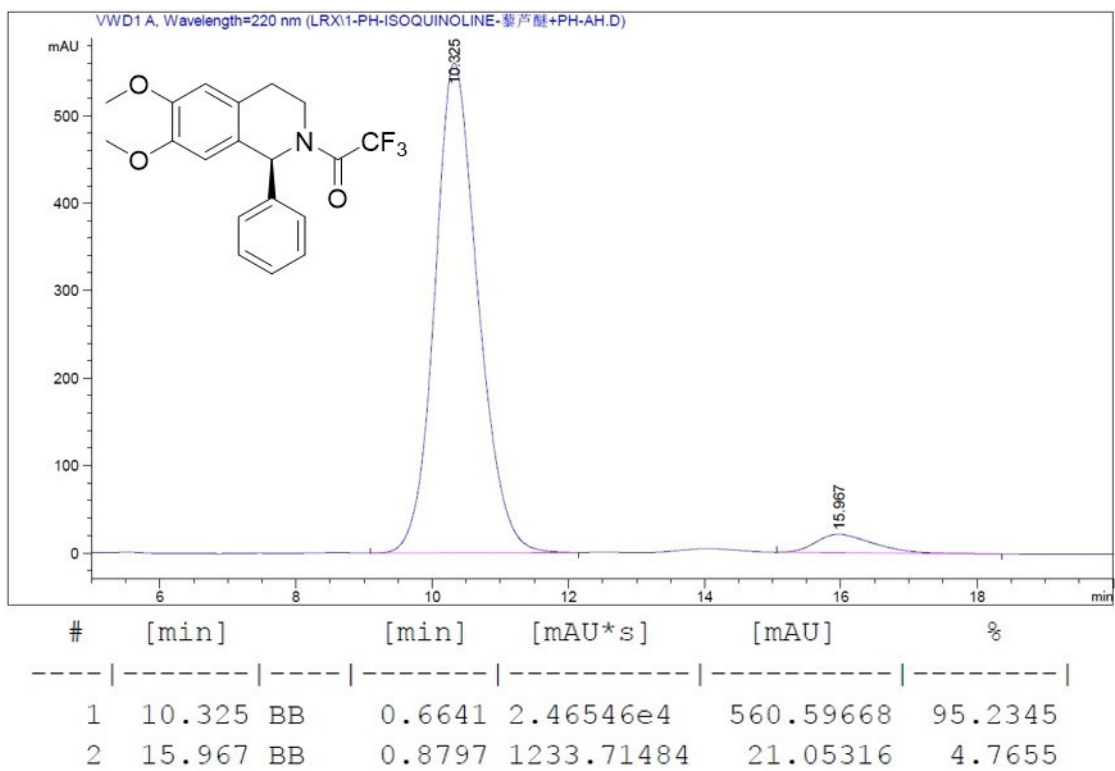

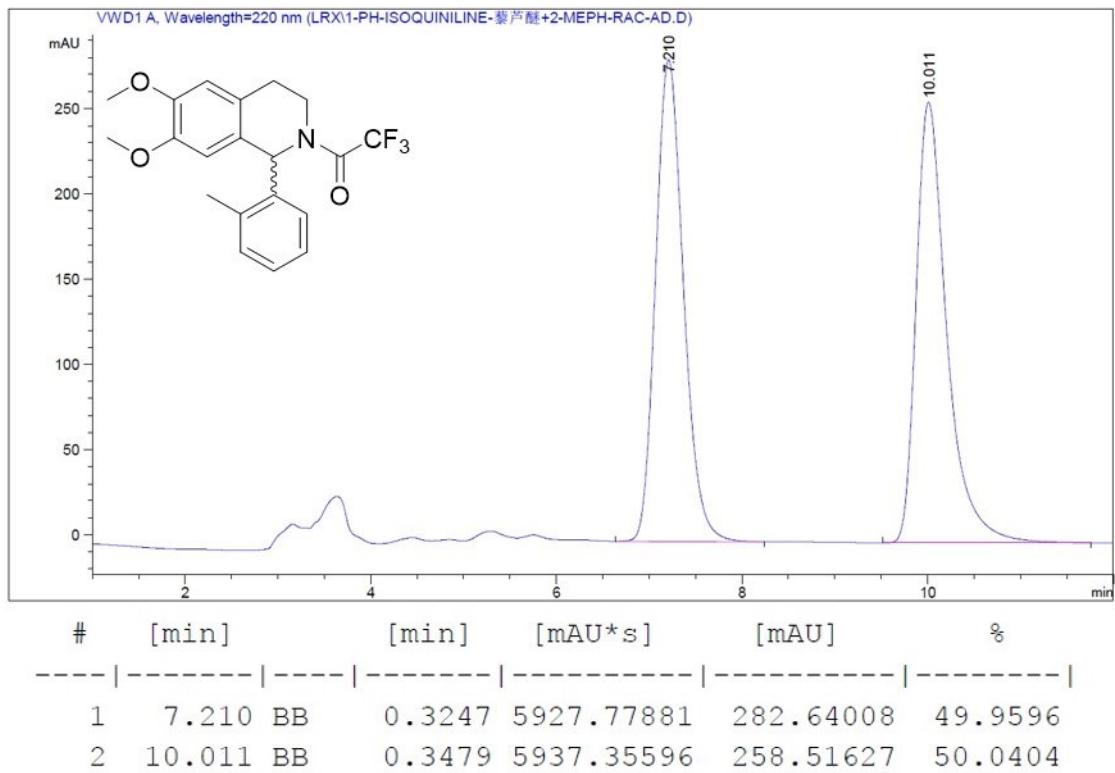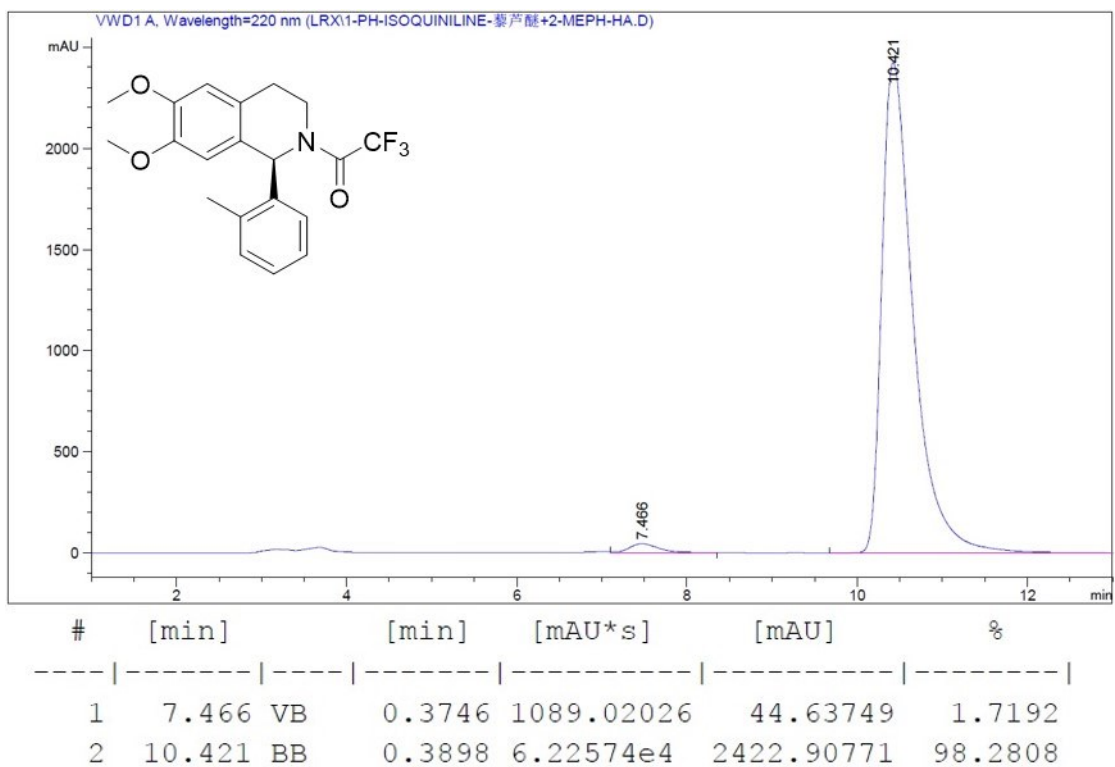

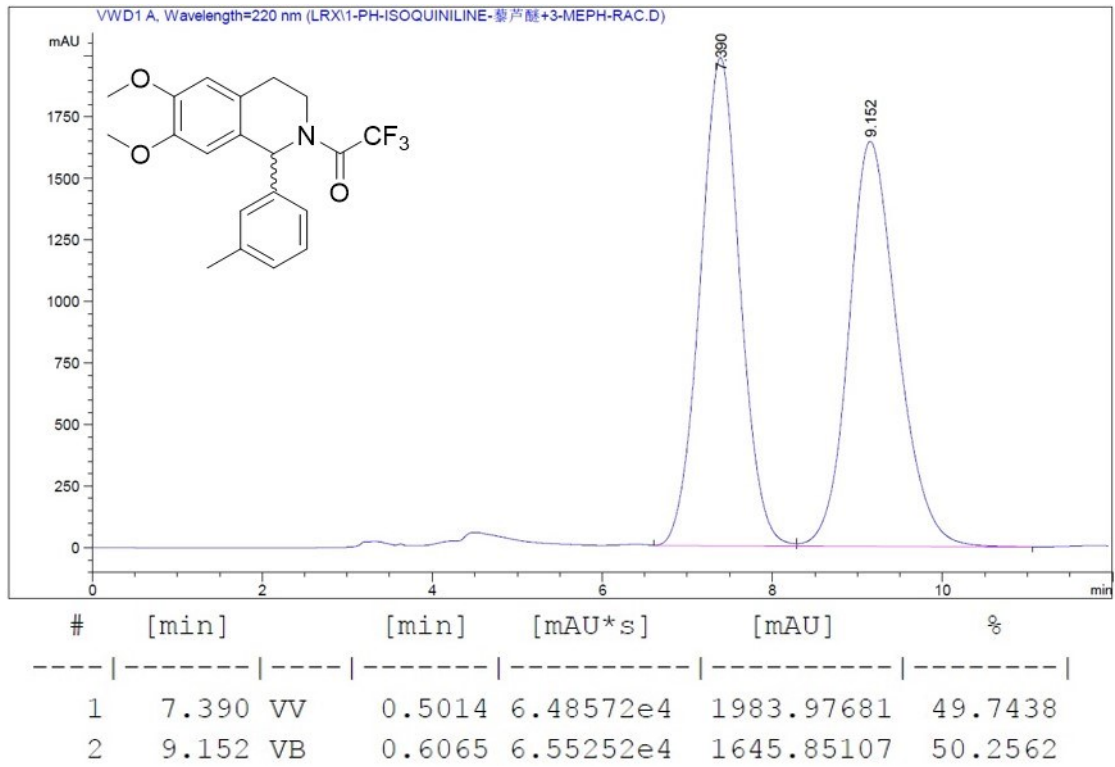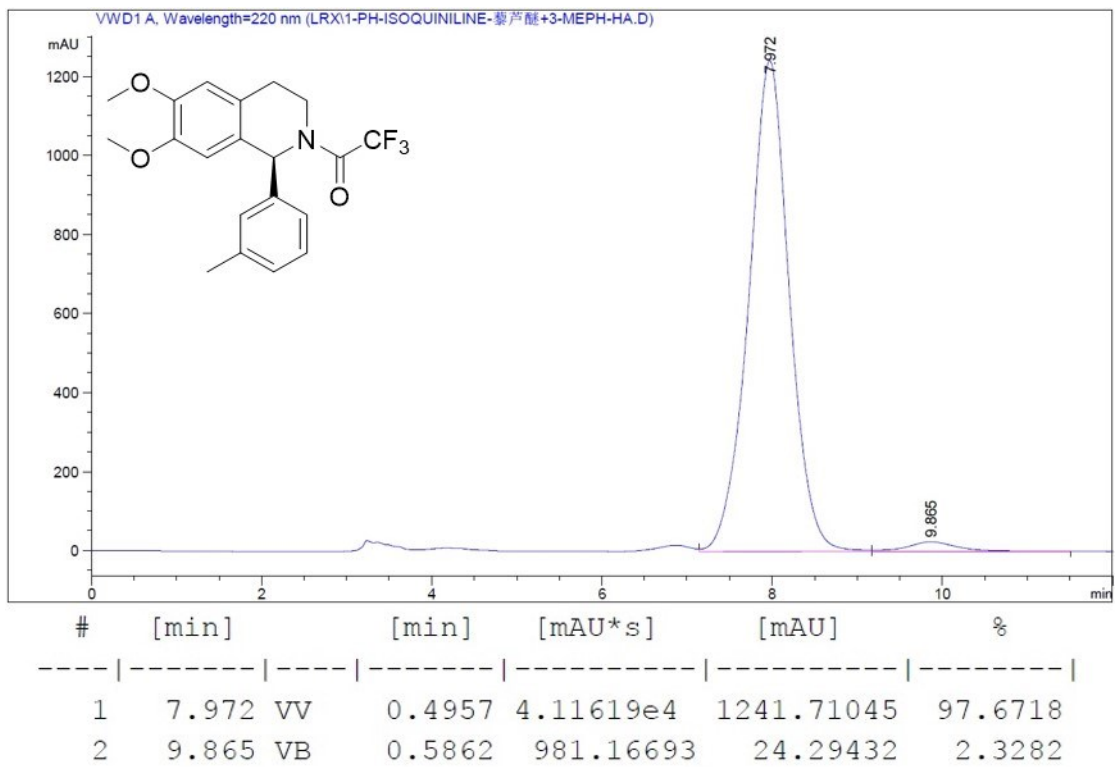

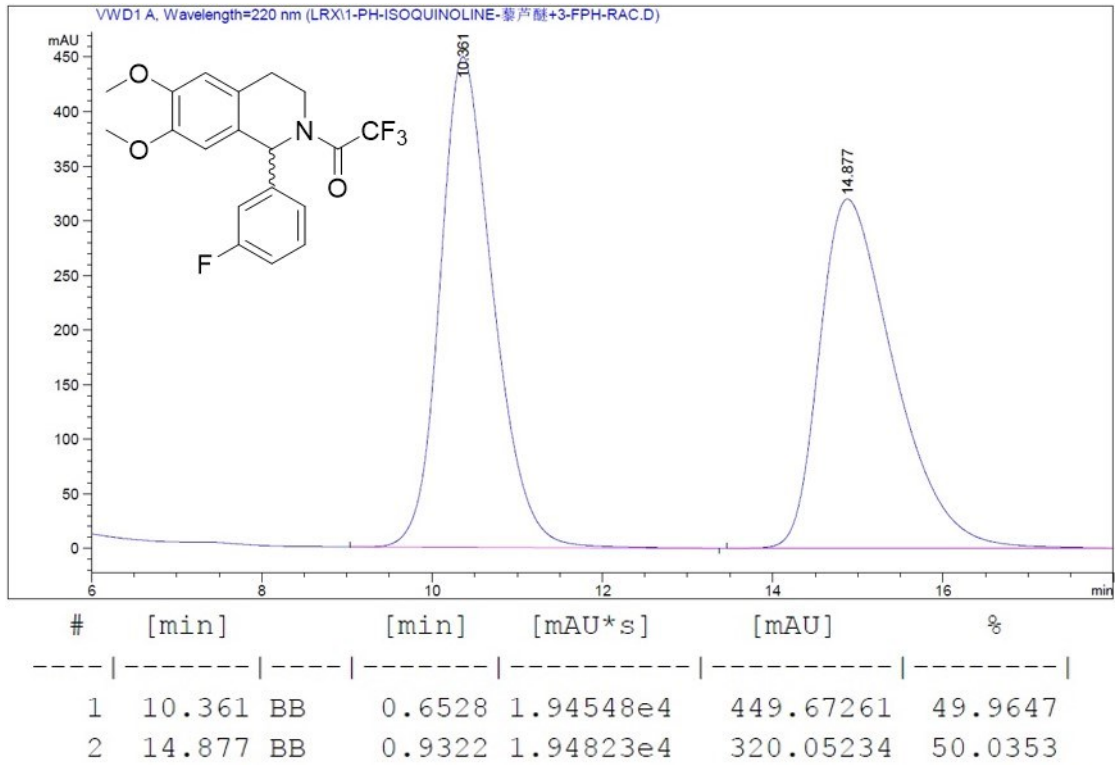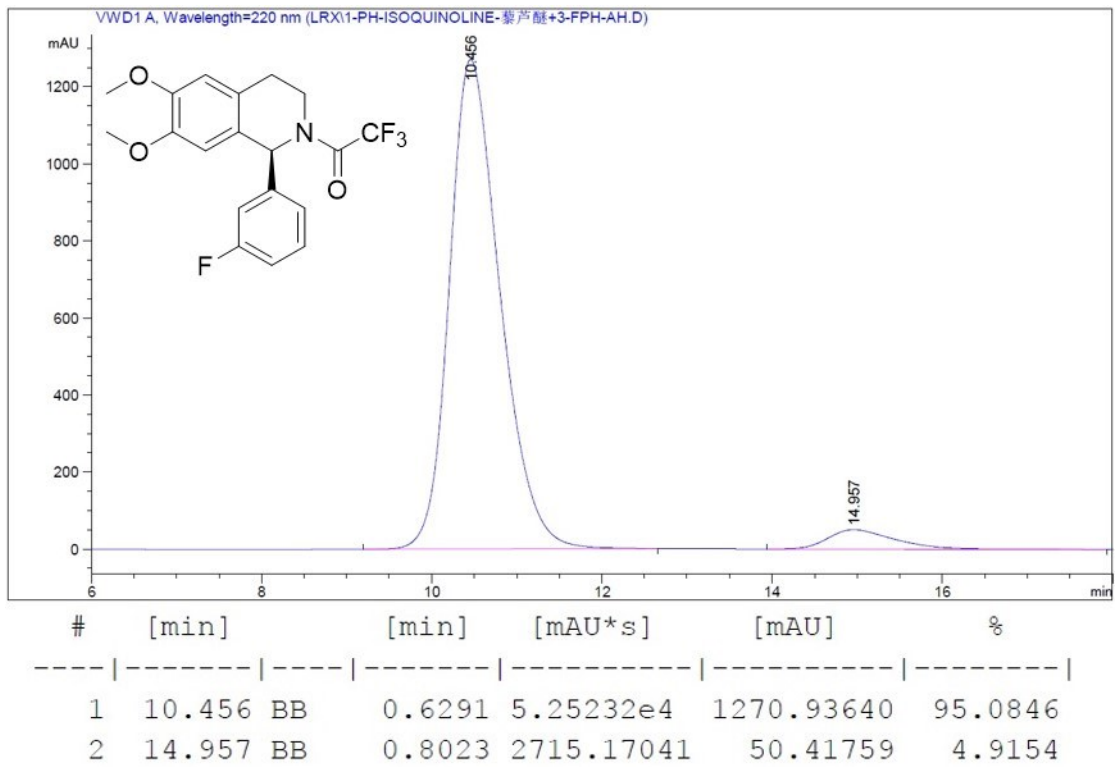

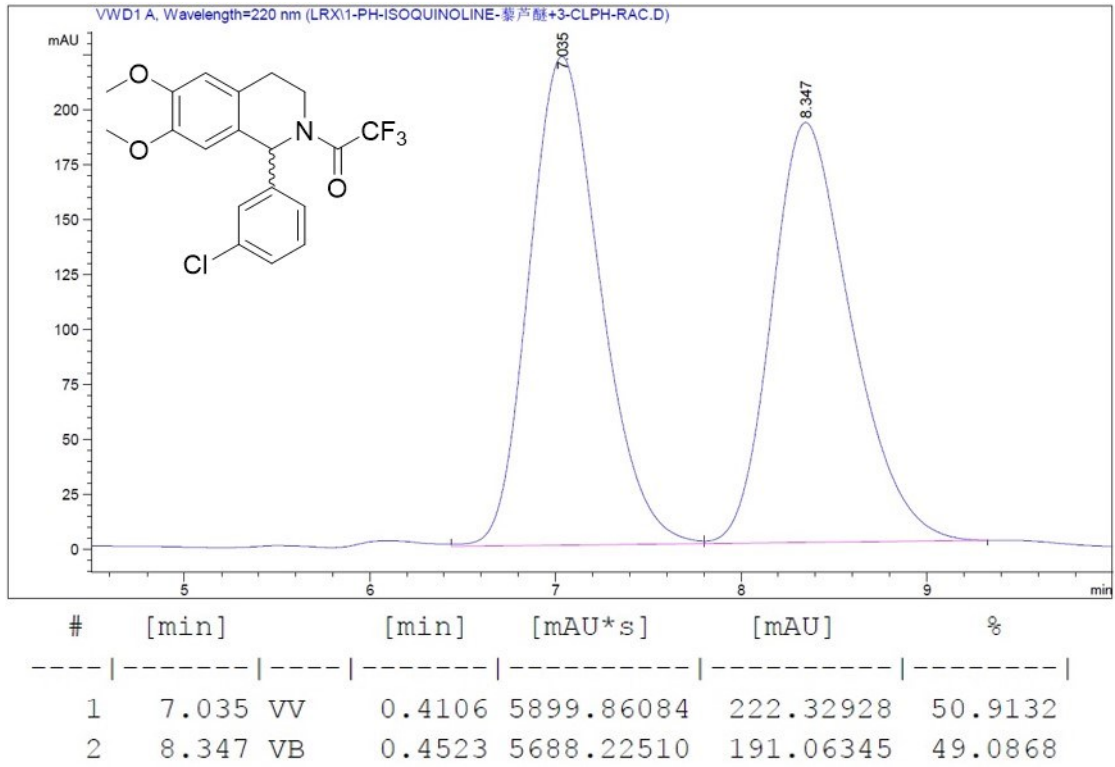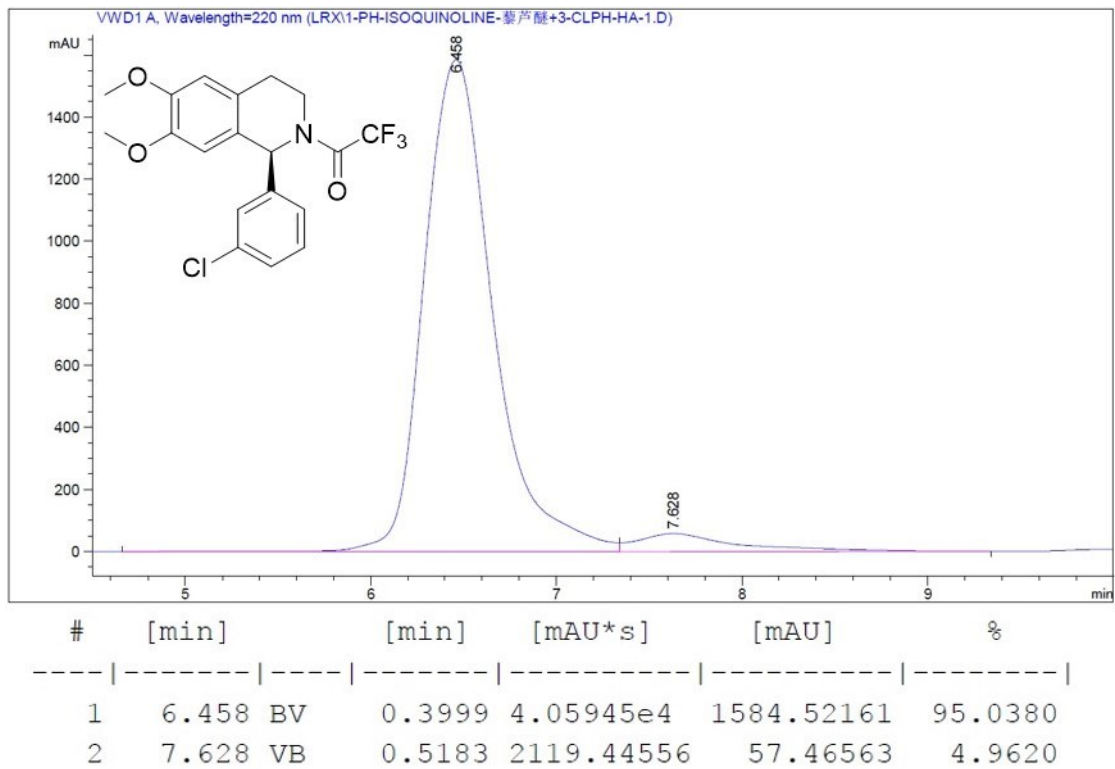

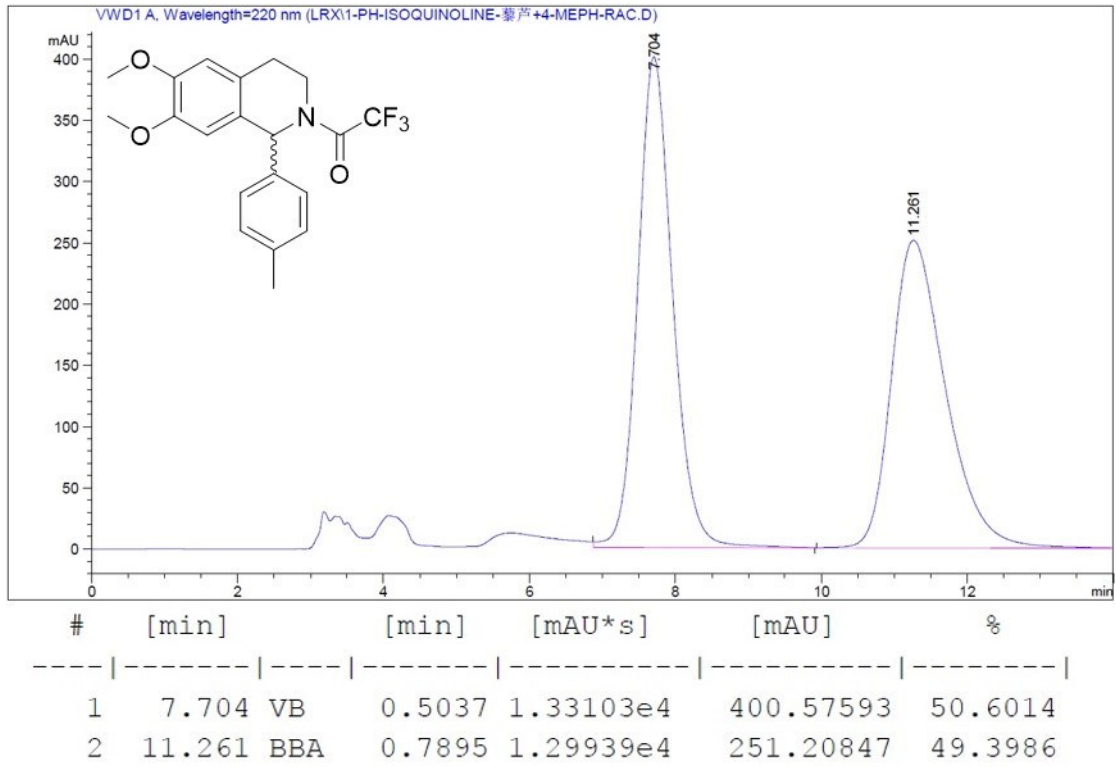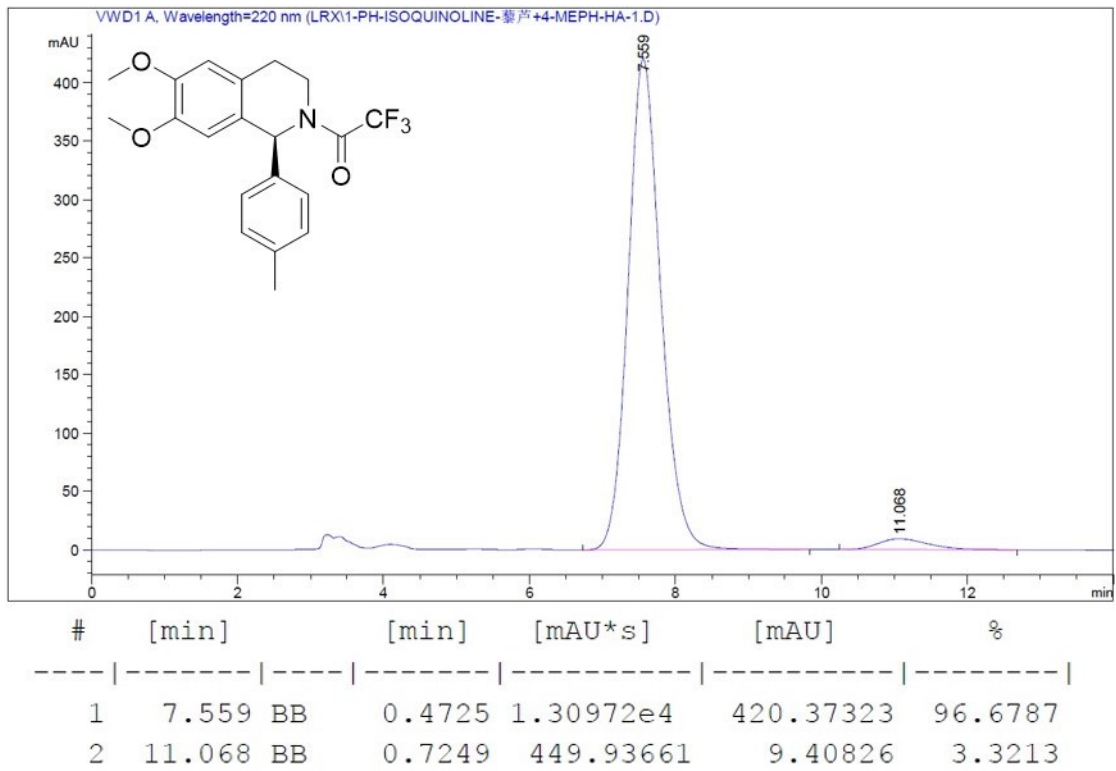

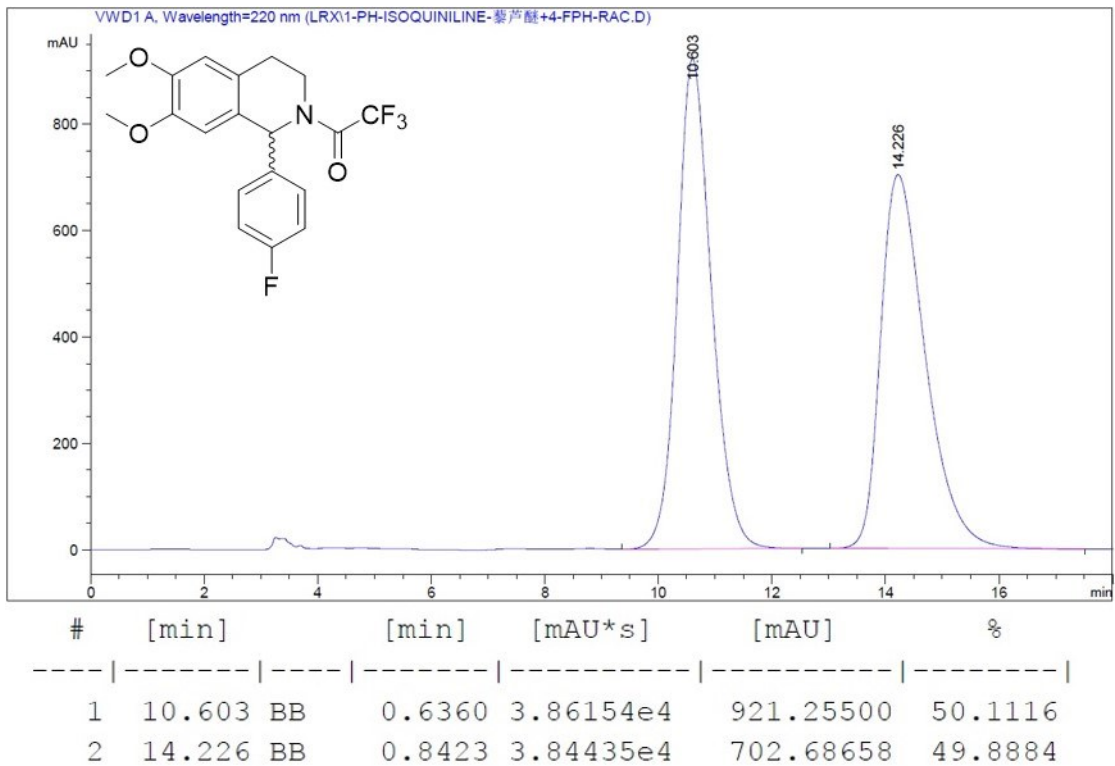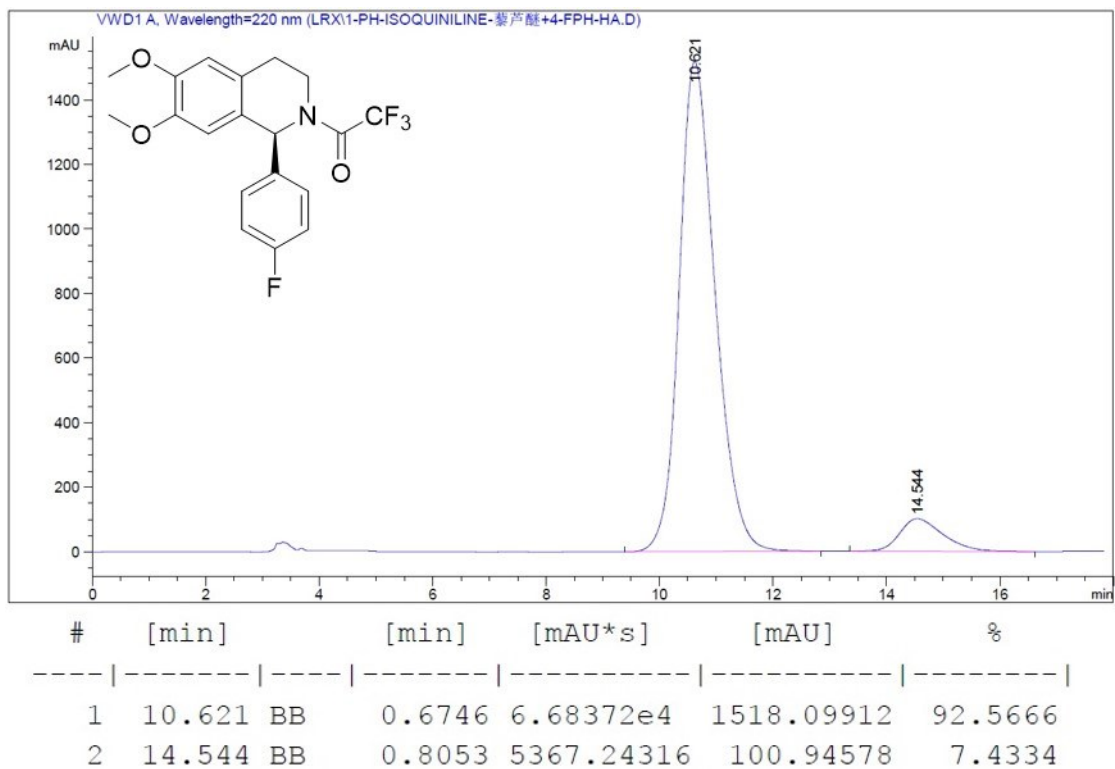

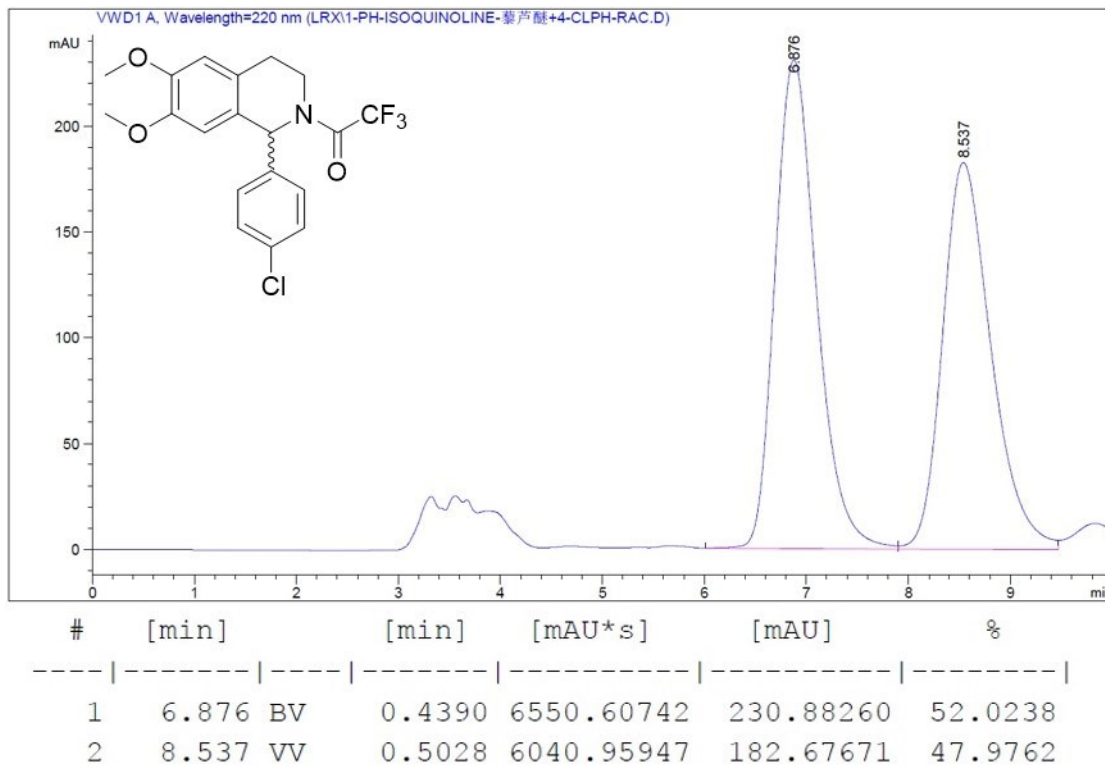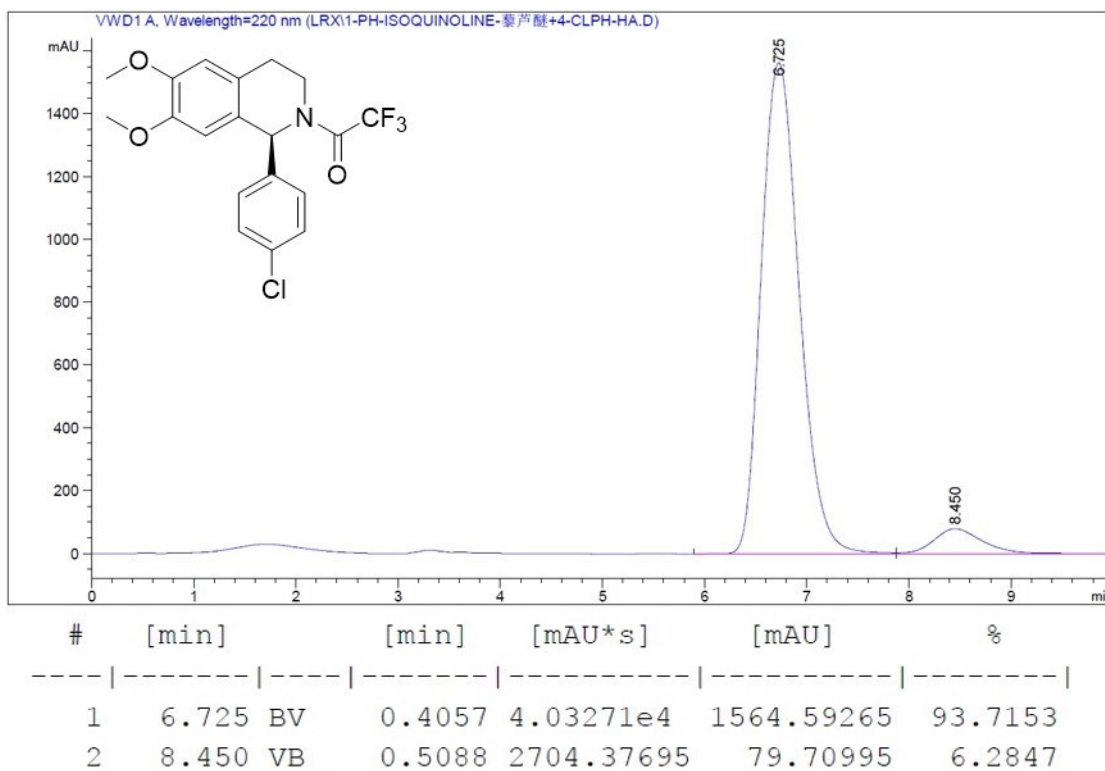



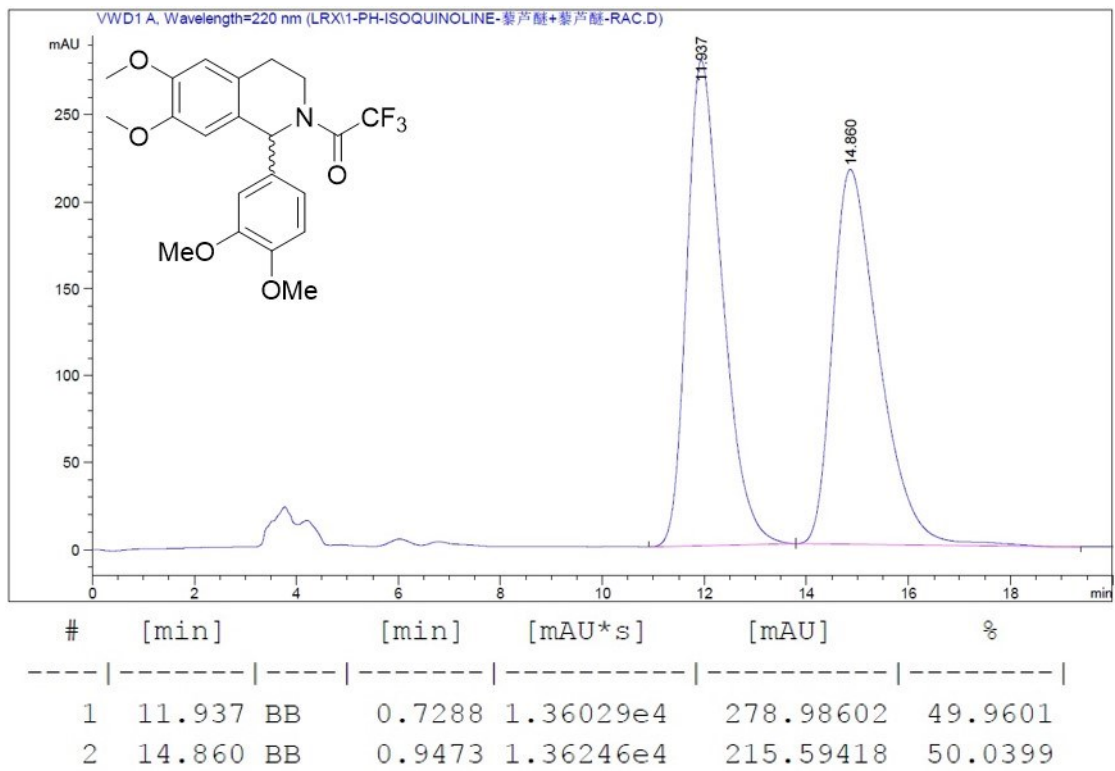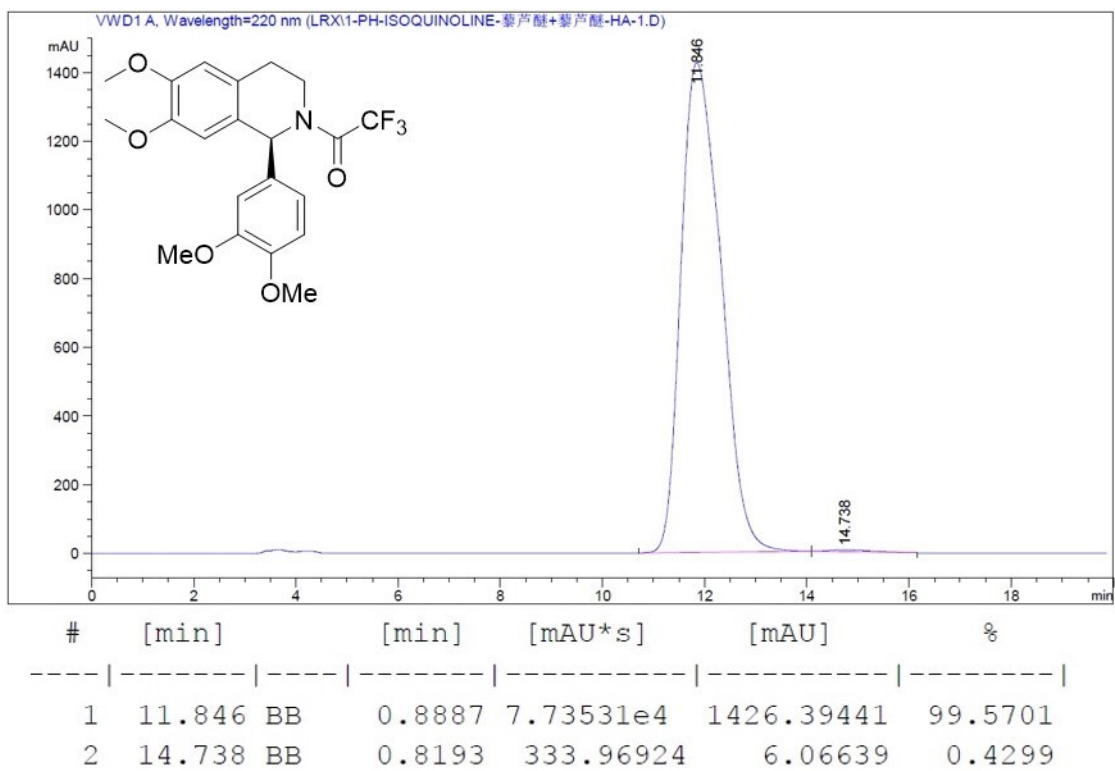

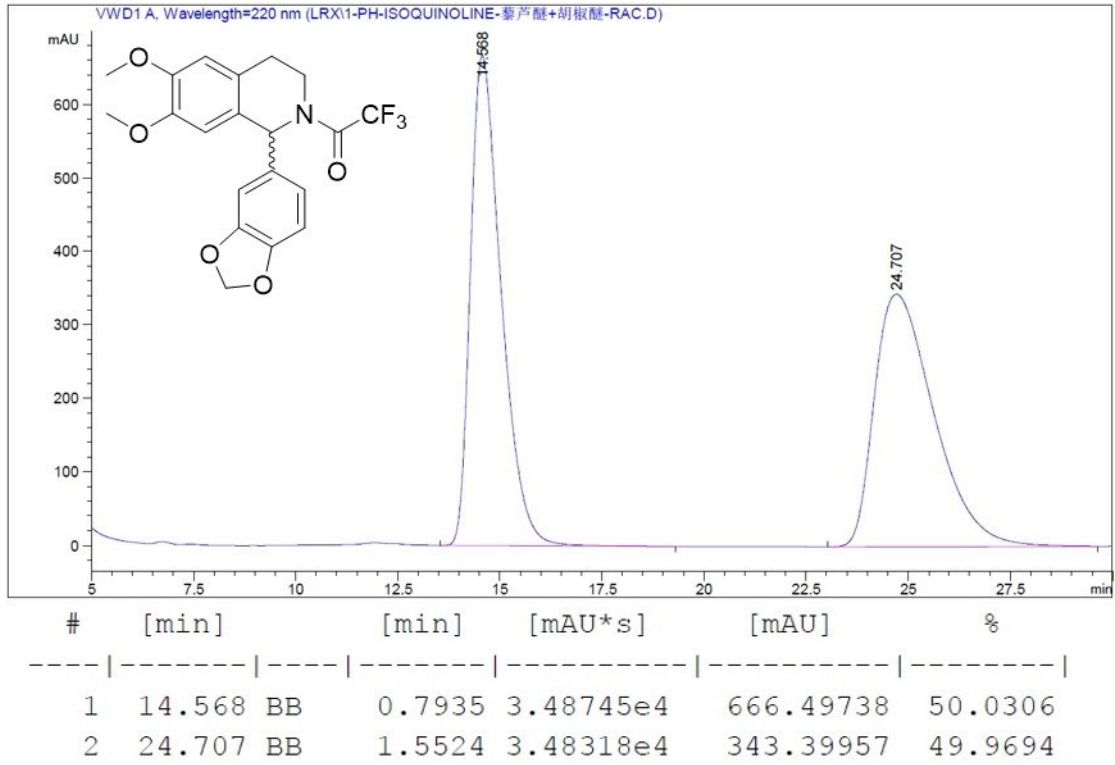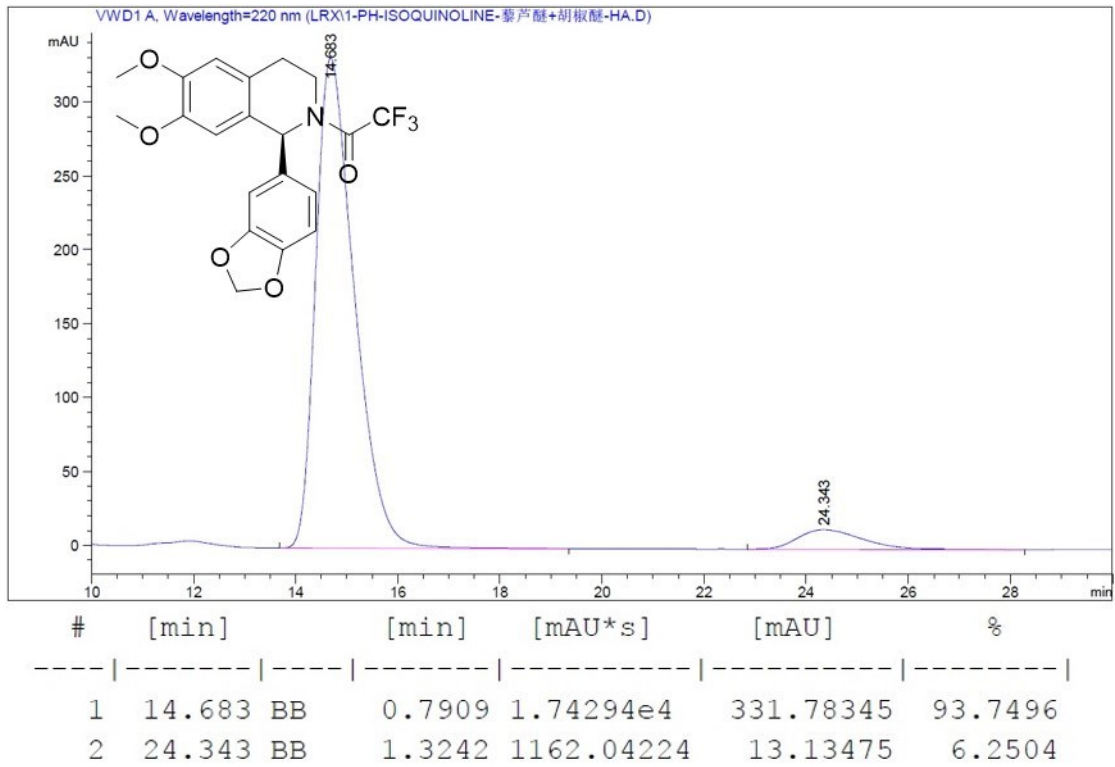

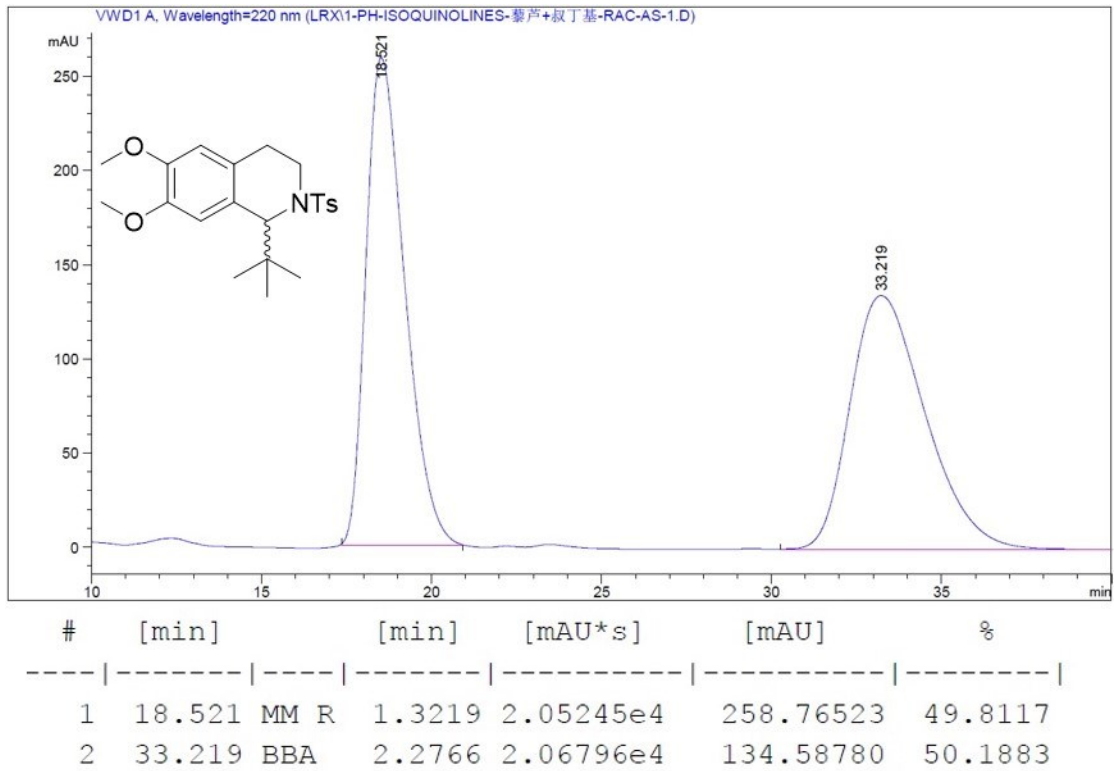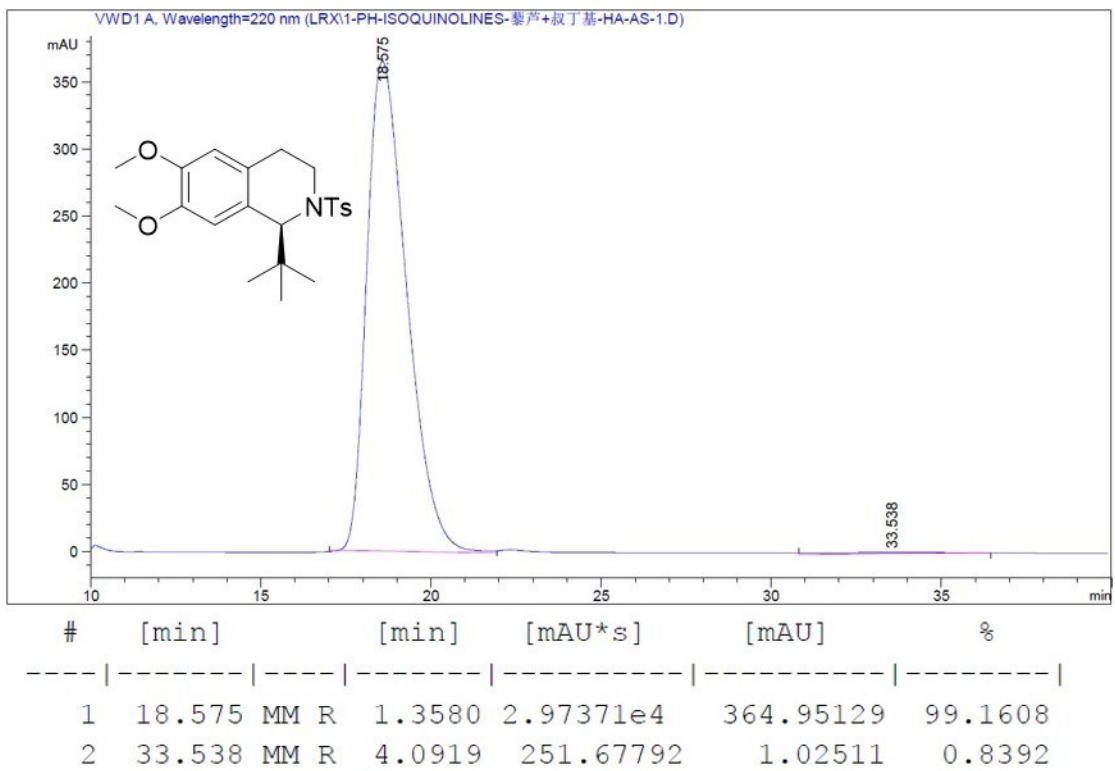

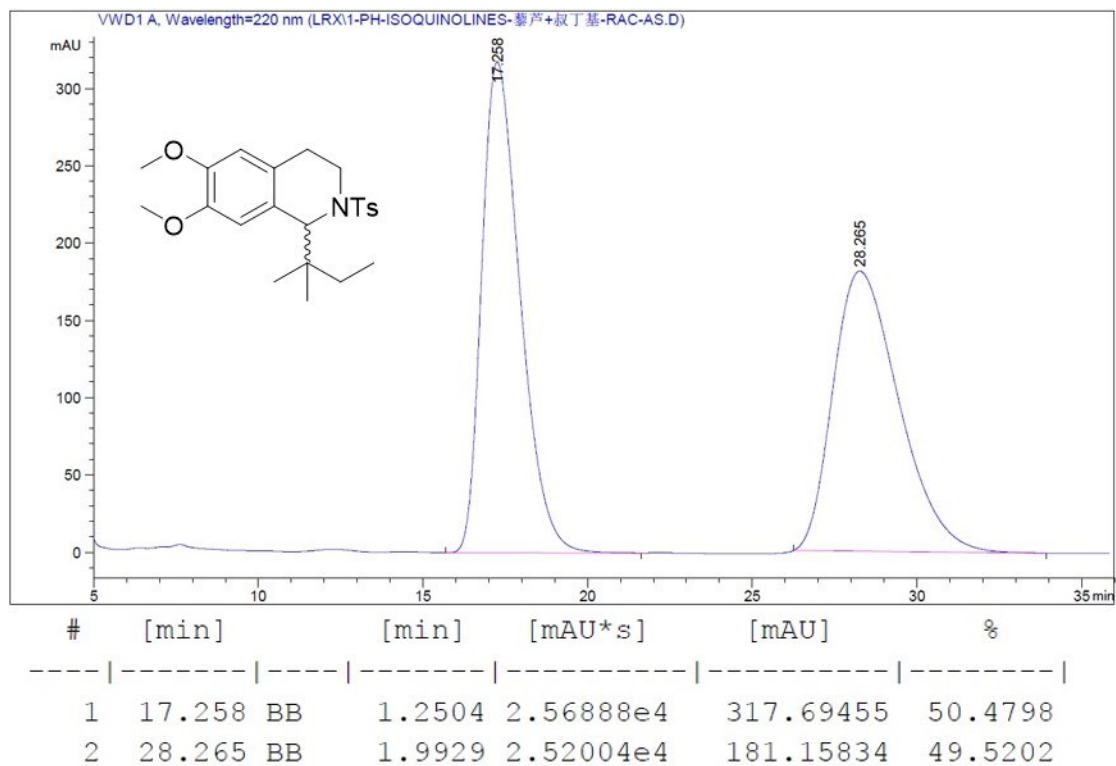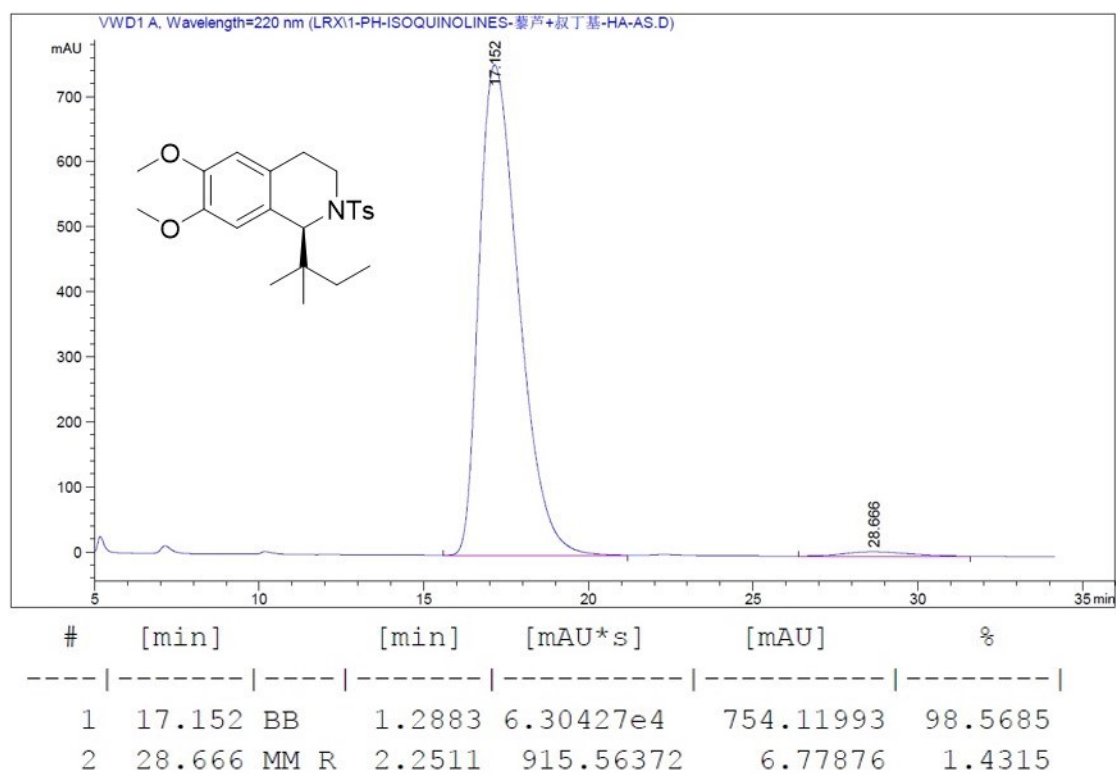

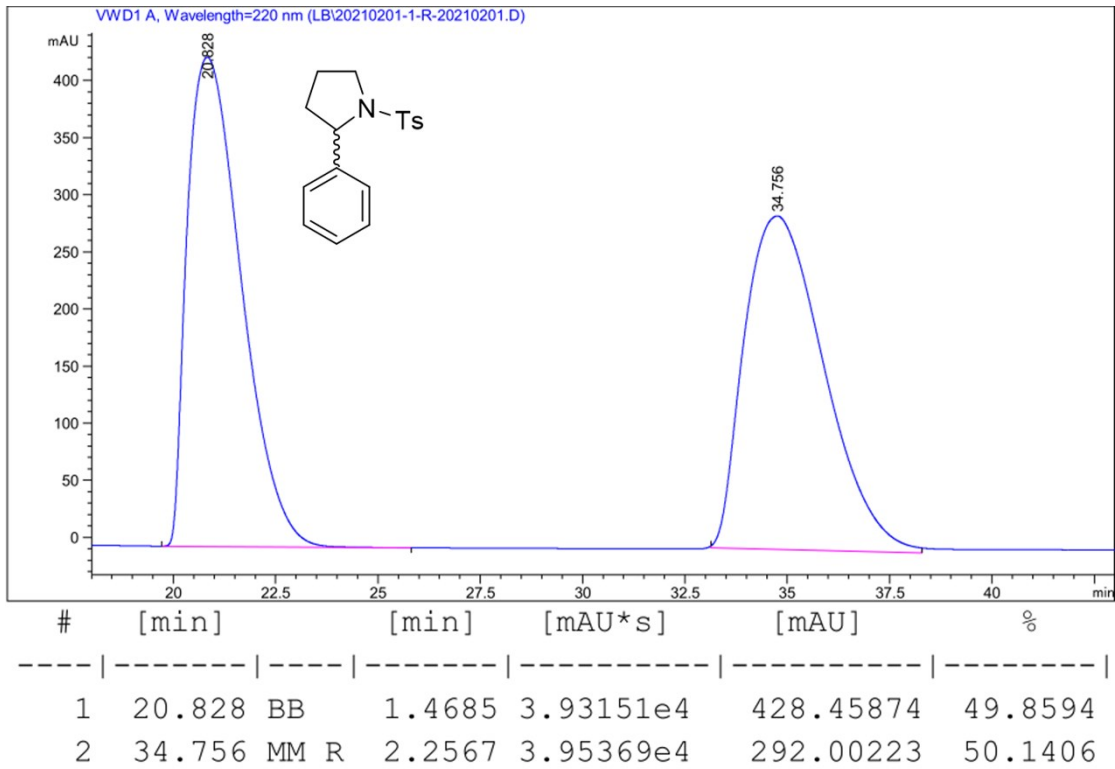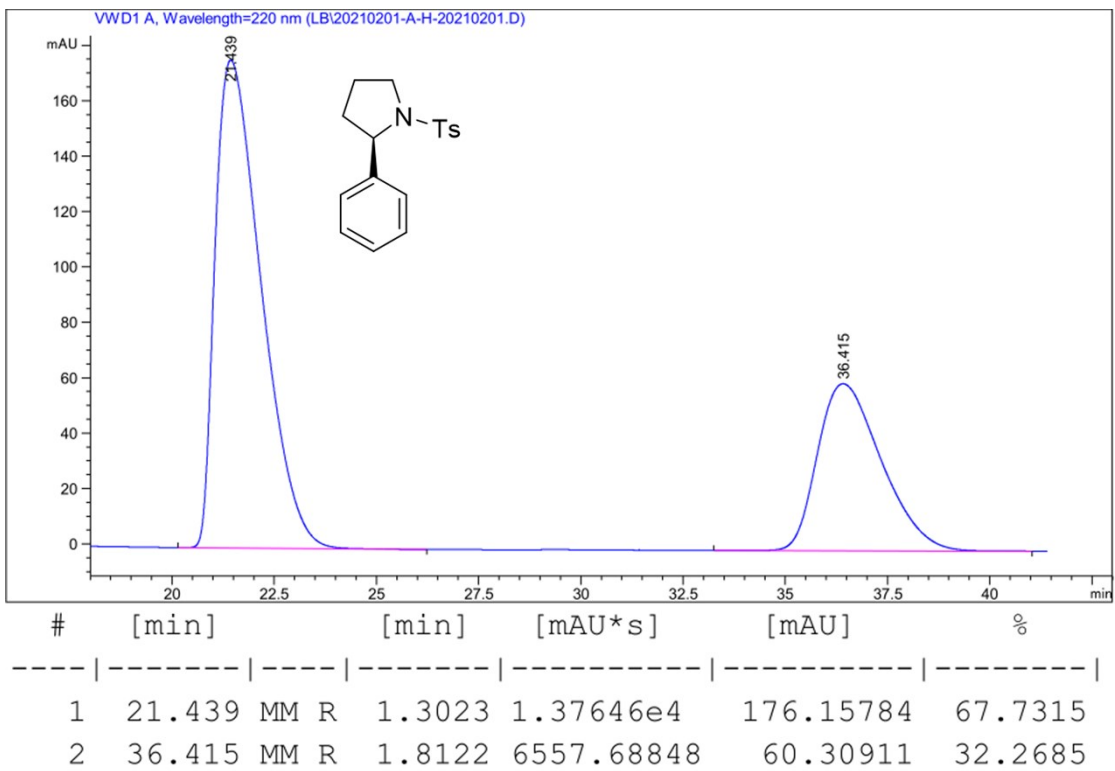

## References

1. J. In, S. Hwang, Ch. Kim, J. H. Seo, and S. Kim, Synthesis of 3,4-dihydroisoquinolin-1-ones from N-Boc-( $\beta$ -Arylethyl) carbamates via isocyanate intermediates, *Eur. J. Org. Chem.*, 2013, **5**, 965–971.
2. H. Zhou, Y. Liu, S. Yang, L. Zhou and M. Chang, One-pot N-deprotection and catalytic intramolecular asymmetric reductive amination for the synthesis of tetrahydroisoquinolines, *Angew. Chem., Int. Ed.*, 2017, **56**, 2725–2729.
3. K. Aganda, B. Hong, and A. Lee, Aerobic  $\alpha$ -oxidation of N-substituted tetrahydroisoquinolines to dihydroisoquinolones via organo-photocatalysis, *Adv. Synth. Catal.*, 2019, **361**, 1124–1129.
4. Y. Zhang, Q. Yan, G. Zi and G. Hou, Enantioselective direct synthesis of free cyclic amines via intramolecular reductive amination, *Org. Lett.*, 2017, **19**, 4215–4218.
5. P. Zhu, W. Ye, J. Li, Y. Zhang, W. Huang, M. Cheng, Y. Wang, Y. Zhang, H. Liu, J. Zuo, Design, synthesis, and biological evaluation of novel tetrahydroisoquinoline derivatives as potential antitumor candidate, *Chem. Biol. Drug. Des.*, 2017, **89**, 443–455.
6. H. Nie, Y. Zhu, X. Hu, Z. Wei, L. Yao, G. Zhou, P. Wang, R. Jiang and S. Zhang, Josiphos-type binaphane ligands for iridium-catalyzed enantioselective hydrogenation of 1-aryl-substituted dihydroisoquinolines, *Org. Lett.*, 2019, **21**, 8641–8645.
7. P. Cheng, N. Huang, Z. Jiang, Q. Zhang, Y. Zheng, J. Chen, X. Zhang, and Y. Ma, 1-Aryl-tetrahydroisoquinoline analogs as active anti-HIV agents in vitro, *Bioorg. Med. Chem. Lett.*, 2008, **18**, 2475–2478.
8. A. B. Péter, F. Tamá, and M. Milen, Total synthesis of racemic 1-aryl-tetrahydroisoquinoline alkaloids, *Monatsh. Chem.*, 2015, **146**, 1907–1912.
9. P. N. Craig, F. P. Nabenhauer, P. M. Williams, E. Macko, and J. Toner, Tetrahydroisoquinolines. I. 1-alkyl-6,7-dihydroxy-1,2,3,4-tetrahydroisoquinolines, *J. Am. Chem. Soc.* 1952, **74**, 1316–1617.
